# Supplementary material for: A Division of Labor between YAP and TAZ in Non–Small Cell Lung Cancer
Source: Oxford University Press journal article supplement (doi:10.1158/0008-5472.can-20-0125), 2020-08-14
Supplement: 00085472can200125-sup-235469_2_supp_6451211_qyjr2t.xlsx [file 00085472can200125-sup-235469_2_supp_6451211_qyjr2t.xlsx]

## Sheet: YAP-differential drugs
	name	dose	screen_id	moa	target	disease.area	indication	smiles	phase	broad_id_trimmed	P-value
584	lisofylline	2.5	HTS	interleukin receptor antagonist, STAT inhibitor	NA	NA	NA	CC(O)CCCCn1c(=O)n(C)c2ncn(C)c2c1=O	Phase 2	A05334458	0.00157419
600	meluadrine	2.5	HTS	NA	NA	NA	NA	CC(C)(C)NCC(O)c1ccc(O)cc1Cl	Preclinical	A07164067	0.000429894
618	famprofazone	2.5	HTS	cyclooxygenase inhibitor	NA	NA	NA	CC(Cc1ccccc1)N(C)Cc1c(C(C)C)c(=O)n(-c2ccccc2)n1C, CC(Cc1ccccc1)N(C)Cc1c(C(C)C)c(=O)n(-c2ccccc2)n1C	Preclinical	A08255417	0.00335587
620.3	doxycycline	2.38	HTS	metalloproteinase inhibitor	MMP8	dental	periodontitis	C[C@@H]1[C@H]2[C@H](O)[C@H]3[C@H](N(C)C)C(=O)C(C(N)=O)C(=O)[C@@]3(O)C(=O)C2C(=O)c2c(O)cccc12, C[C@@H]1[C@H]2[C@H](O)[C@H]3[C@H](N(C)C)C(=O)C(C(N)=O)C(=O)[C@@]3(O)C(=O)C2C(=O)c2c(O)cccc12, C[C@@H]1[C@H]2[C@H](O)[C@H]3[C@H](N(C)C)C(=O)C(C(N)=O)C(=O)[C@@]3(O)C(=O)C2C(=O)c2c(O)cccc12, C[C@@H]1[C@H]2[C@H](O)[C@H]3[C@H](N(C)C)C(=O)C(C(N)=O)C(=O)[C@@]3(O)C(=O)C2C(=O)c2c(O)cccc12, C[C@@H]1[C@H]2[C@H](O)[…	Launched	A08545410	0.00354185
645	fosfomycin	2.5	HTS	bacterial cell wall synthesis inhibitor	NA	infectious disease	urinary tract infections	C[C@@H]1O[C@@H]1P(O)(O)=O, CC1OC1P(O)(O)=O	Launched	A10652366	0.00986108
661	nutlin-3	2.5	HTS	MDM inhibitor	MDM2, TP53	NA	NA	COc1ccc(C2=NC(C(N2C(=O)N2CCNC(=O)C2)c2ccc(Cl)cc2)c2ccc(Cl)cc2)c(OC(C)C)c1, COc1ccc(C2=NC(C(N2C(=O)N2CCNC(=O)C2)c2ccc(Cl)cc2)c2ccc(Cl)cc2)c(OC(C)C)c1, COc1ccc(C2=N[C@@H]([C@@H](N2C(=O)N2CCNC(=O)C2)c2ccc(Cl)cc2)c2ccc(Cl)cc2)c(OC(C)C)c1	Preclinical	A12230535	0.00232949
778	zaldaride	2.5	HTS	calmodulin antagonist	CALM1	NA	NA	CC1(CN2CCC(CC2)n2c3ccccc3[nH]c2=O)OCc2ccccc2-n2cccc12, CC1(CN2CCC(CC2)n2c3ccccc3[nH]c2=O)OCc2ccccc2-n2cccc12	Phase 3	A26032986	0.00175577
787	atropine	2.5	HTS	acetylcholine receptor antagonist	CHRM1, CHRM2, CHRM3, CHRM4, CHRM5	ophthalmology	cycloplegia, mydriasis, amblyopia	CN1[C@H]2CC[C@@H]1C[C@@H](C2)OC(=O)C(CO)c1ccccc1, CN1[C@H]2CC[C@@H]1C[C@@H](C2)OC(=O)C(CO)c1ccccc1	Launched	A27290375	0.00441532
867	amcinonide	2.5	HTS	glucocorticoid receptor agonist	ANXA1, NR3C1	dermatology	corticosteroid-responsive dermatoses	CC(=O)OCC(=O)[C@@]12OC3(CCCC3)O[C@@H]1CC1C3CCC4=CC(=O)C=C[C@]4(C)[C@@]3(F)[C@@H](O)C[C@]21C	Launched	A36010170	0.000291843
892	teroxirone	2.5	HTS	DNA inhibitor	NA	NA	NA	O=c1n(CC2CO2)c(=O)n(CC2CO2)c(=O)n1CC1CO1	Phase 1	A39935389	0.00643686
916	ornidazole	2.5	HTS	antiprotozoal agent	NA	infectious disease	protozoan infection	Cc1ncc(n1CC(O)CCl)[N+]([O-])=O, Cc1ncc(n1CC(O)CCl)[N+]([O-])=O, Cc1ncc(n1CC(O)CCl)[N+]([O-])=O	Launched	A42759514	0.00643686
939	WYE-125132	2.5	HTS	mTOR inhibitor	MTOR	NA	NA	CNC(=O)Nc1ccc(cc1)-c1nc(N2CC3CCC(C2)O3)c2cnn(C3CCC4(CC3)OCCO4)c2n1	Preclinical	A45498368	0.00301914
983	flumethasone-pivalate	2.5	HTS	glucocorticoid receptor agonist	NR3C1, SERPINA6	NA	NA	C[C@@H]1CC2C3C[C@H](F)C4=CC(=O)C=C[C@]4(C)[C@@]3(F)[C@@H](O)C[C@]2(C)[C@@]1(O)C(=O)COC(=O)C(C)(C)C	Launched	A50064262	0.00194924
988	CGK-733	2.5	HTS	ATM kinase inhibitor, ATR kinase inhibitor	ATM, ATR	NA	NA	[O-][N+](=O)c1cc(NC(=S)NC(NC(=O)C(c2ccccc2)c2ccccc2)C(Cl)(Cl)Cl)ccc1F, [O-][N+](=O)c1cc(NC(=S)NC(NC(=O)C(c2ccccc2)c2ccccc2)C(Cl)(Cl)Cl)ccc1F, [O-][N+](=O)c1cc(NC(=S)NC(NC(=O)C(c2ccccc2)c2ccccc2)C(Cl)(Cl)Cl)ccc1F, [O-][N+](=O)c1cc(NC(=S)NC(NC(=O)C(c2ccccc2)c2ccccc2)C(Cl)(Cl)Cl)ccc1F	Preclinical	A50737080	0.00676725
1066	sodium-stibogluconate	2.5	HTS	tyrosine phosphatase inhibitor	PTPN6, TOP1	infectious disease	leishmaniasis	OCC(O)C1O[Sb]2(O)(O[Sb]34(O)OC(C(O)CO)C(O3)C(O4)C(O)=O)OC1C(O2)C(O)=O	Launched	A60786380	0.00886551
1130	K-858	2.5	HTS	kinesin-like spindle protein inhibitor	KIF11	NA	NA	CC(=O)NC1=NN(C(C)=O)C(C)(S1)c1ccccc1	Preclinical	A67748489	0.00744066
1187	pralatrexate	2.5	HTS	dihydrofolate reductase inhibitor	DHFR, TYMS	hematologic malignancy	peripheral T-cell lymphoma (PTCL)	Nc1nc(N)c2nc(CC(CC#C)c3ccc(cc3)C(=O)N[C@@H](CCC(O)=O)C(O)=O)cnc2n1	Launched	A74914197	0.00174075
1197	blebbistatin-(+/-)	2.5	HTS	ATPase inhibitor	MYH2	NA	NA	Cc1ccc2N=C3N(CCC3(O)C(=O)c2c1)c1ccccc1	Preclinical	A75817871	0.00217941
1290	chloroquine	2.5	HTS	antimalarial agent	GSTA2, MRGPRX1, TLR9, TNF	infectious disease	malaria, amebiasis	CCN(CC)CCCC(C)Nc1ccnc2cc(Cl)ccc12, CCN(CC)CCCC(C)Nc1ccnc2cc(Cl)ccc12, CCN(CC)CCCC(C)Nc1ccnc2cc(Cl)ccc12	Launched	A91699651	0.008434
1362	RITA	2.4	HTS	MDM inhibitor	MDM2	NA	NA	OCc1ccc(s1)-c1ccc(o1)-c1ccc(CO)s1, OCc1ccc(s1)-c1ccc(o1)-c1ccc(CO)s1	Preclinical	K00317371	0.00124329
1402	triapine	2.5	HTS	ribonucleotide reductase inhibitor	RRM1, RRM2	NA	NA	NC(=S)N\N=C\c1ncccc1N, NC(=S)N\N=C\c1ncccc1N, NC(=S)N\N=C\c1ncccc1N	Phase 2	K01669786	0.0021352
1444	SU-11274	2.5	HTS	hepatocyte growth factor receptor inhibitor, tyrosine kinase inhibitor	MET	NA	NA	CN(c1cccc(Cl)c1)S(=O)(=O)c1ccc2NC(=O)\C(=C/c3[nH]c(C)c(C(=O)N4CCN(C)CC4)c3C)c2c1, CN(c1cccc(Cl)c1)S(=O)(=O)c1ccc2NC(=O)\C(=C/c3[nH]c(C)c(C(=O)N4CCN(C)CC4)c3C)c2c1	Preclinical	K02965346	0.000854131
1454	trifluridine	2.37	HTS	DNA directed DNA polymerase inhibitor, thymidylate synthase inhibitor	TYMS	infectious disease	virus herpes simplex (HSV)	OC[C@H]1O[C@H](C[C@@H]1O)n1cc(c(=O)[nH]c1=O)C(F)(F)F, OC[C@H]1O[C@H](C[C@@H]1O)n1cc(c(=O)[nH]c1=O)C(F)(F)F, OC[C@H]1O[C@H](C[C@@H]1O)n1cc(c(=O)[nH]c1=O)C(F)(F)F, OC[C@H]1O[C@H](C[C@@H]1O)n1cc(c(=O)[nH]c1=O)C(F)(F)F	Launched	K03243820	5.32e-05
1464	azacitidine	2.5	HTS	DNA methyltransferase inhibitor	DNMT1, DNMT3A	hematologic malignancy, hematology	myelodysplastic diseases (MDS), anemia, chronic myelomonocytic leukemia (CMMoL)	Nc1ncn([C@@H]2O[C@H](CO)[C@@H](O)[C@H]2O)c(=O)n1, Nc1ncn([C@@H]2O[C@H](CO)[C@@H](O)[C@H]2O)c(=O)n1, Nc1ncn([C@@H]2O[C@H](CO)[C@@H](O)[C@H]2O)c(=O)n1	Launched	K03406345	0.00100287
1477	drospirenone	2.49	HTS	mineralocorticoid receptor antagonist	AR, NR3C2, PGR	endocrinology	contraceptive	C[C@]12CC[C@H]3[C@@H]([C@H]4C[C@H]4C4=CC(=O)CC[C@]34C)[C@@H]1[C@@H]1C[C@@H]1[C@@]21CCC(=O)O1, C[C@]12CC[C@H]3[C@@H]([C@H]4C[C@H]4C4=CC(=O)CC[C@]34C)[C@@H]1[C@@H]1C[C@@H]1[C@@]21CCC(=O)O1, C[C@]12CC[C@H]3[C@@H]([C@H]4C[C@H]4C4=CC(=O)CC[C@]34C)[C@@H]1[C@@H]1C[C@@H]1[C@@]21CCC(=O)O1, C[C@]12CC[C@H]3[C@@H]([C@H]4C[C@H]4C4=CC(=O)CC[C@]34C)[C@@H]1[C@@H]1C[C@@H]1[C@@]21CCC(=O)O1	Launched	K04394237	0.00450621
1494	GSK-3-inhibitor-IX	2.5	HTS	glycogen synthase kinase inhibitor, lipoxygenase inhibitor	GSK3A, GSK3B	NA	NA	O\N=C1/C(Nc2ccccc12)=C1/C(=O)Nc2cc(Br)ccc12, O\N=C1/C(Nc2ccccc12)=C1/C(=O)Nc2cc(Br)ccc12	Preclinical	K04923131	0.00614681
1562	moclobemide	2.5	HTS	monoamine oxidase inhibitor	MAOA, MAOB	neurology/psychiatry	depression, anxiety	Clc1ccc(cc1)C(=O)NCCN1CCOCC1, Clc1ccc(cc1)C(=O)NCCN1CCOCC1	Launched	K07237224	0.00175577
1595	entecavir	2.5	HTS	DNA replication inhibitor, nucleoside reverse transcriptase inhibitor	NA	infectious disease	hepatitis B	Nc1nc(=O)c2ncn([C@H]3C[C@H](O)[C@@H](CO)C3=C)c2[nH]1	Launched	K08206212	0.0040514
1653	FGIN-1-27	2.5	HTS	inositol monophosphatase inhibitor	TSPO	NA	NA	CCCCCCN(CCCCCC)C(=O)Cc1c([nH]c2ccccc12)-c1ccc(F)cc1, CCCCCCN(CCCCCC)C(=O)Cc1c([nH]c2ccccc12)-c1ccc(F)cc1	Preclinical	K09778810	0.008434
1755	mechlorethamine	2.5	HTS	DNA inhibitor	NA	hematologic malignancy, hematology, infectious disease, oncology	Hodgkin's lymphoma, chronic myeloid leukemia (CML), chronic lymphocytic leukemia (CLL), polycythemia vera, mycosis, bronchogenic carcinoma	CN(CCCl)CCCl, CN(CCCl)CCCl, CN(CCCl)CCCl, CN(CCCl)CCCl, CN(CCCl)CCCl	Launched	K12829205	5.91e-06
1795	midostaurin	2.5	HTS	FLT3 inhibitor, KIT inhibitor, PKC inhibitor	FLT3, PRKCG	hematologic malignancy	acute myeloid leukemia (AML)	CO[C@@H]1[C@@H](C[C@H]2O[C@]1(C)n1c3ccccc3c3c4CNC(=O)c4c4c5ccccc5n2c4c13)N(C)C(=O)c1ccccc1	Launched	K13646352	0.00194924
1804	tenovin-6	2.5	HTS	SIRT inhibitor	SIRT1, SIRT2, SIRT3	NA	NA	CN(C)CCCCC(=O)Nc1ccc(NC(=S)NC(=O)c2ccc(cc2)C(C)(C)C)cc1, CN(C)CCCCC(=O)Nc1ccc(NC(=S)NC(=O)c2ccc(cc2)C(C)(C)C)cc1	Preclinical	K13949769	0.00268015
1820	IKK-16	2.5	HTS	IKK inhibitor	IKBKB	NA	NA	O=C(N1CCC(CC1)N1CCCC1)c1ccc(Nc2nccc(n2)-c2cc3ccccc3s2)cc1, O=C(N1CCC(CC1)N1CCCC1)c1ccc(Nc2nccc(n2)-c2cc3ccccc3s2)cc1, O=C(N1CCC(CC1)N1CCCC1)c1ccc(Nc2nccc(n2)-c2cc3ccccc3s2)cc1	Preclinical	K14618467	0.00217513
1867	lobendazole	2.5	HTS	anthelmintic agent	NA	NA	NA	CCOC(=O)Nc1nc2ccccc2[nH]1	Preclinical	K15834839	0.000793423
1902	pibenzimol	2.5	HTS	DNA inhibitor	NA	NA	NA	c1ccc2[nH]c(nc2c1)-c1nc2ccccc2[nH]1, CN1CCN(CC1)c1ccc2nc([nH]c2c1)-c1ccc2nc([nH]c2c1)-c1ccc(O)cc1	Phase 2	K17026858	0.00194924
1919	penicillamine-(D)	2.5	HTS	chelating agent	NA	metabolism, rheumatology, nephrology	Wilson's disease, rheumatoid arthritis, cystinuria	CC(C)(S)[C@@H](N)C(O)=O, CC(C)(S)[C@@H](N)C(O)=O	Launched	K17518951	0.00450621
1985	prochlorperazine	2.5	HTS	dopamine receptor antagonist	DRD1, DRD2, DRD3, DRD4	gastroenterology	nausea, vomiting	CN1CCN(CCCN2c3ccccc3Sc3ccc(Cl)cc23)CC1, CN1CCN(CCCN2c3ccccc3Sc3ccc(Cl)cc23)CC1, CN1CCN(CCCN2c3ccccc3Sc3ccc(Cl)cc23)CC1, CN1CCN(CCCN2c3ccccc3Sc3ccc(Cl)cc23)CC1	Launched	K19352500	0.00534405
1995	ruxolitinib-(S)	2.5	HTS	JAK inhibitor	JAK1, JAK2	NA	NA	N#CC[C@@H](C1CCCC1)n1cc(cn1)-c1ncnc2[nH]ccc12	Preclinical	K19601669	0.00771648
2041.1	NVP-TAE226	2.5	HTS	protein tyrosine kinase inhibitor	PTK2	NA	NA	CNC(=O)c1ccccc1Nc1nc(Nc2ccc(cc2OC)N2CCOCC2)ncc1Cl, CNC(=O)c1ccccc1Nc1nc(Nc2ccc(cc2OC)N2CCOCC2)ncc1Cl	Preclinical	K21025364	0.00243081
2088	pirodavir	2.5	HTS	NA	NA	NA	NA	CCOC(=O)c1ccc(OCCC2CCN(CC2)c2ccc(C)nn2)cc1	Phase 2	K22261391	0.00534405
2122	voreloxin	2.5	HTS	topoisomerase inhibitor	TOP2A	NA	NA	CN[C@H]1CN(C[C@@H]1OC)c1ccc2c(n1)n(cc(C(O)=O)c2=O)-c1nccs1	Phase 3	K23677682	0.000378462
2124	dichlorvos	2.5	HTS	acetylcholinesterase inhibitor	NA	NA	NA	COP(=O)(OC)OC=C(Cl)Cl	Launched	K23779958	0.000439881
2131	sorafenib	2.5	HTS	FLT3 inhibitor, KIT inhibitor, PDGFR tyrosine kinase receptor inhibitor, RAF inhibitor, RET tyrosine kinase inhibitor, VEGFR inhibitor	BRAF, DDR2, FGFR1, FLT1, FLT3, FLT4, KDR, KIT, PDGFRB, RAF1, RET	oncology	renal cell carcinoma (RCC), thyroid cancer, hepatocellular carcinoma (HCC)	CNC(=O)c1cc(Oc2ccc(NC(=O)Nc3ccc(Cl)c(c3)C(F)(F)F)cc2)ccn1, CNC(=O)c1cc(Oc2ccc(NC(=O)Nc3ccc(Cl)c(c3)C(F)(F)F)cc2)ccn1	Launched	K23984367	0.00412861
2150	ETP-46464	2.5	HTS	ATR kinase inhibitor	NA	NA	NA	CC(C)(C#N)c1ccc(cc1)N1C(=O)OCc2cnc3ccc(cc3c12)-c1cnc2ccccc2c1	Preclinical	K24556407	0.000793423
2166	5-fluorouracil	2.5	HTS	thymidylate synthase inhibitor	DPYD, TYMS	oncology	colorectal cancer, breast cancer, pancreatic cancer, gastric adenocarcinoma	Fc1c[nH]c(=O)[nH]c1=O, Fc1c[nH]c(=O)[nH]c1=O	Launched	K24844714	6.23e-05
2195	PRT062070	2.5	HTS	JAK inhibitor, syk inhibitor	SYK	NA	NA	CCS(=O)(=O)N1CCN(CC1)c1ccc(Nc2ncc(C(N)=O)c(NC3CC3)n2)cc1, CCS(=O)(=O)N1CCN(CC1)c1ccc(Nc2ncc(C(N)=O)c(NC3CC3)n2)cc1, CCS(=O)(=O)N1CCN(CC1)c1ccc(Nc2ncc(C(N)=O)c(NC3CC3)n2)cc1	Phase 1	K25835157	0.00175577
2224	TAK-733	2.5	HTS	MEK inhibitor	MAP2K1	NA	NA	Cn1c2ncn(C[C@@H](O)CO)c(=O)c2c(Nc2ccc(I)cc2F)c(F)c1=O, Cn1c2ncn(C[C@@H](O)CO)c(=O)c2c(Nc2ccc(I)cc2F)c(F)c1=O	Phase 1	K26667523	0.00271231
2233	azomycin-(2-nitroimidazole)	2.5	HTS	protein synthesis inhibitor	NA	NA	NA	[O-][N+](=O)c1ncc[nH]1, [O-][N+](=O)c1ncc[nH]1	Preclinical	K26824830	0.00643686
2249	calcitriol	2.44	HTS	vitamin D receptor agonist	VDR	endocrinology, orthopedics	hypocalcemia, hypoparathyroidism, osteoporosis	C[C@H](CCCC(C)(C)O)[C@H]1CC[C@@H]2[C@]1(C)CCC\C2=C/C=C1/C[C@@H](O)C[C@H](O)C1=C, C[C@H](CCCC(C)(C)O)[C@H]1CC[C@@H]2[C@]1(C)CCC\C2=C/C=C1/C[C@@H](O)C[C@H](O)C1=C, C[C@H](CCCC(C)(C)O)[C@H]1CC[C@@H]2[C@]1(C)CCC\C2=C/C=C1/C[C@@H](O)C[C@H](O)C1=C	Launched	K27316855	0.000193007
2277	ganaxolone	2.5	HTS	GABA receptor modulator	GABRA1, GABRA2, GABRA3, GABRA4, GABRA5, GABRA6	NA	NA	CC(=O)[C@H]1CC[C@H]2[C@@H]3CC[C@H]4C[C@](C)(O)CC[C@]4(C)[C@H]3CC[C@]12C	Phase 3	K28217197	0.000704118
2282	TW-37	2.31	HTS	BCL inhibitor	BCL2, BCL2L1, MCL1	NA	NA	CC(C)c1ccccc1Cc1cc(C(=O)Nc2ccc(cc2)S(=O)(=O)c2ccccc2C(C)(C)C)c(O)c(O)c1O, CC(C)c1ccccc1Cc1cc(C(=O)Nc2ccc(cc2)S(=O)(=O)c2ccccc2C(C)(C)C)c(O)c(O)c1O	Preclinical	K28360340	0.00313062
2300	resminostat	2.5	HTS	HDAC inhibitor	HDAC1, HDAC3, HDAC6, HDAC8	NA	NA	CN(C)Cc1ccc(cc1)S(=O)(=O)n1ccc(c1)\C=C\C(=O)NO, CN(C)Cc1ccc(cc1)S(=O)(=O)n1ccc(c1)\C=C\C(=O)NO	Phase 2	K28822270	0.00194924
2334	ostarine	2.5	HTS	androgen receptor modulator	AR	NA	NA	C[C@](O)(COc1ccc(cc1)C#N)C(=O)Nc1ccc(C#N)c(c1)C(F)(F)F	Phase 3	K29735307	0.00771648
2337	axitinib	2.5	HTS	PDGFR tyrosine kinase receptor inhibitor, VEGFR inhibitor	CSF1, FLT1, FLT4, KDR, PLK4	oncology	renal cell carcinoma (RCC)	CNC(=O)c1ccccc1Sc1ccc2c(\C=C\c3ccccn3)n[nH]c2c1, CNC(=O)c1ccccc1Sc1ccc2c(\C=C\c3ccccn3)n[nH]c2c1, CNC(=O)c1ccccc1Sc1ccc2c(\C=C\c3ccccn3)n[nH]c2c1, CNC(=O)c1ccccc1Sc1ccc2c(\C=C\c3ccccn3)n[nH]c2c1, CNC(=O)c1ccccc1Sc1ccc2c(\C=C\c3ccccn3)n[nH]c2c1	Launched	K29905972	0.00505125
2373	NH125	2.5	HTS	eukaryotic translation elongation factor 2 inhibitor	NA	NA	NA	CCCCCCCCCCCCCCCC[n+]1ccn(Cc2ccccc2)c1C, CCCCCCCCCCCCCCCC[n+]1ccn(Cc2ccccc2)c1C	Preclinical	K31086665	0.00217513
2397	TAK-632	2.5	HTS	RAF inhibitor	BRAF	NA	NA	Fc1ccc(Oc2ccc3nc(NC(=O)C4CC4)sc3c2C#N)cc1NC(=O)Cc1cccc(c1)C(F)(F)F	Preclinical	K31866293	0.00744066
2414	D-7193	2.5	HTS	NA	NA	NA	NA	CC(=O)N[C@@H](CSSC[C@H](NC(C)=O)C(O)=O)C(O)=O	Phase 2	K32372024	1.2e-05
2416	vanoxerine	2.5	HTS	dopamine uptake inhibitor	SLC6A3	NA	NA	Fc1ccc(cc1)C(OCCN1CCN(CCCc2ccccc2)CC1)c1ccc(F)cc1, Fc1ccc(cc1)C(OCCN1CCN(CCCc2ccccc2)CC1)c1ccc(F)cc1	Phase 3	K32501161	0.00614681
2422	azathioprine	2.5	HTS	dehydrogenase inhibitor	HPRT1, IMPDH1, PPAT	transplant, rheumatology	renal homotransplantation, rheumatoid arthritis	Cn1cnc(c1Sc1[nH]cnc2ncnc12)[N+]([O-])=O, Cn1cnc(c1Sc1[nH]cnc2ncnc12)[N+]([O-])=O, Cn1cnc(c1Sc1[nH]cnc2ncnc12)[N+]([O-])=O	Launched	K32821942	0.00486052
2551	ribociclib	2.5	HTS	CDK inhibitor	CDK4, CDK6	oncology	breast cancer	CN(C)C(=O)c1cc2cnc(Nc3ccc(cn3)N3CCNCC3)nc2n1C1CCCC1, CN(C)C(=O)c1cc2cnc(Nc3ccc(cn3)N3CCNCC3)nc2n1C1CCCC1, CN(C)C(=O)c1cc2cnc(Nc3ccc(cn3)N3CCNCC3)nc2n1C1CCCC1	Launched	K36788280	0.00505125
2559	go-6983	2.5	HTS	protein kinase inhibitor	PRKCA, PRKCB, PRKCD, PRKCG, PRKCZ	NA	NA	COc1ccc2n(CCCN(C)C)cc(C3=C(C(=O)NC3=O)c3c[nH]c4ccccc34)c2c1, COc1ccc2n(CCCN(C)C)cc(C3=C(C(=O)NC3=O)c3c[nH]c4ccccc34)c2c1	Preclinical	K36984403	0.00157419
2564	1-hexadecanol	2.5	HTS	NA	NA	dermatology	cosmetic	CCCCCCCCCCCCCCCCO, CCCCCCCCCCCCCCCCO	Launched	K37203094	0.00637349
2580	AZD8330	2.5	HTS	MEK inhibitor	NA	NA	NA	Cc1cc(C(=O)NOCCO)c(Nc2ccc(I)cc2F)n(C)c1=O, Cc1cc(C(=O)NOCCO)c(Nc2ccc(I)cc2F)n(C)c1=O	Phase 1	K37687095	0.00486052
2658	torin-1	2.5	HTS	mTOR inhibitor	MTOR	NA	NA	CCC(=O)N1CCN(CC1)c1ccc(cc1C(F)(F)F)-n1c2c(ccc1=O)cnc1ccc(cc21)-c1cnc2ccccc2c1, CCC(=O)N1CCN(CC1)c1ccc(cc1C(F)(F)F)-n1c2c(ccc1=O)cnc1ccc(cc21)-c1cnc2ccccc2c1	Preclinical	K40175214	0.00441532
2663	crizotinib-(S)	2.54	HTS	MTH1 inhibitor	NUDT1	NA	NA	C[C@H](Oc1cc(cnc1N)-c1cnn(c1)C1CCNCC1)c1c(Cl)ccc(F)c1Cl, C[C@H](Oc1cc(cnc1N)-c1cnn(c1)C1CCNCC1)c1c(Cl)ccc(F)c1Cl	Preclinical	K40308497	0.00276152
2668	eltrombopag	2.34	HTS	thrombopoietin receptor agonist	MPL	hematology, infectious disease	anemia, hepatitis C, thrombocytopenia	CC1=NN(C(=O)C\1=N\Nc1cccc(-c2cccc(c2)C(O)=O)c1O)c1ccc(C)c(C)c1, CC1=NN(C(=O)C\1=N\Nc1cccc(-c2cccc(c2)C(O)=O)c1O)c1ccc(C)c(C)c1, CC1=NN(C(=O)C\1=N\Nc1cccc(-c2cccc(c2)C(O)=O)c1O)c1ccc(C)c(C)c1	Launched	K40496271	0.00712758
2758	GDC-0349	2.52	HTS	Pim kinase inhibitor	PIK3CA	NA	NA	CCNC(=O)Nc1ccc(cc1)-c1nc2CN(CCc2c(n1)N1CCOC[C@@H]1C)C1COC1, CCNC(=O)Nc1ccc(cc1)-c1nc2CN(CCc2c(n1)N1CCOC[C@@H]1C)C1COC1	Phase 1	K43187018	0.00795629
2848	MPI-0479605	2.49	HTS	mitotic kinase inhibitor	TTK	NA	NA	Cc1cc(ccc1Nc1nc(NC2CCCCC2)c2[nH]cnc2n1)N1CCOCC1, Cc1cc(ccc1Nc1nc(NC2CCCCC2)c2[nH]cnc2n1)N1CCOCC1, Cc1cc(ccc1Nc1nc(NC2CCCCC2)c2[nH]cnc2n1)N1CCOCC1, Cc1cc(ccc1Nc1nc(NC2CCCCC2)c2[nH]cnc2n1)N1CCOCC1	Preclinical	K45551181	0.000375247
2919	dexamethasone-acetate	2.5	HTS	glucocorticoid receptor agonist	NA	endocrinology, rheumatology, allergy, gastroenterology, hematology, neurology/psychiatry, dermatology	hypercalcemia, rheumatoid arthritis, psoriatic arthritis, osteoarthritis, allergic rhinitis, ulcerative colitis, anemia, multiple sclerosis, enteritis, lupus, dermatitis herpetiformis (DH), nephrotic syndrome, psoriasis	C[C@@H]1C[C@H]2[C@@H]3CCC4=CC(=O)C=C[C@]4(C)[C@@]3(F)[C@@H](O)C[C@]2(C)[C@@]1(O)C(=O)COC(C)=O, C[C@@H]1C[C@H]2[C@@H]3CCC4=CC(=O)C=C[C@]4(C)[C@@]3(F)[C@@H](O)C[C@]2(C)[C@@]1(O)C(=O)COC(C)=O	Launched	K47635719	0.00241608
2962	cytochlor	2.5	HTS	NA	NA	NA	NA	Nc1nc(=O)n(cc1Cl)[C@H]1C[C@@H](O)[C@@H](CO)O1	Phase 1	K48988407	0.000584998
3016	NVP-TAE684	2.5	HTS	ALK tyrosine kinase receptor inhibitor	ALK, INSR	NA	NA	COc1cc(ccc1Nc1ncc(Cl)c(Nc2ccccc2S(=O)(=O)C(C)C)n1)N1CCC(CC1)N1CCN(C)CC1	Preclinical	K50140147	0.00174075
3023	hycanthone	2.5	HTS	RNA synthesis inhibitor	NA	infectious disease	schistosomiasis	CCN(CC)CCNc1ccc(CO)c2sc3ccccc3c(=O)c12	Launched	K50406511	0.008434
3048	ethionamide	2.5	HTS	mycolic synthesis inhibitor	NA	infectious disease	tuberculosis	CCc1cc(ccn1)C(S)=N, CCc1cc(ccn1)C(S)=N	Launched	K51207550	0.00896062
3051	palbociclib	2.5	HTS	CDK inhibitor	CDK4, CDK6	oncology	breast cancer	CC(=O)c1c(C)c2cnc(Nc3ccc(cn3)N3CCNCC3)nc2n(C2CCCC2)c1=O, CC(=O)c1c(C)c2cnc(Nc3ccc(cn3)N3CCNCC3)nc2n(C2CCCC2)c1=O	Launched	K51313569	0.00534405
3122	tivozanib	2.5	HTS	VEGFR inhibitor	FLT1, FLT4, KDR, KIT, PDGFRA, PDGFRB	NA	NA	COc1cc2nccc(Oc3ccc(NC(=O)Nc4cc(C)on4)c(Cl)c3)c2cc1OC	Phase 3	K53414658	0.0099873
3127	arctigenin	2.5	HTS	MEK inhibitor	CHUK, MAP2K1	NA	NA	COc1cc(C[C@@H]2[C@@H](Cc3ccc(OC)c(OC)c3)COC2=O)ccc1O, COc1cc(C[C@@H]2[C@@H](Cc3ccc(OC)c(OC)c3)COC2=O)ccc1O	Preclinical	K53523901	0.00155215
3132	MK-5108	2.5	HTS	Aurora kinase inhibitor	AURKA, AURKB, AURKC	NA	NA	OC(=O)[C@@]1(Cc2cccc(Nc3nccs3)n2)CC[C@@H](CC1)Oc1cccc(Cl)c1F	Phase 1	K53665955	0.00100287
3221	amonafide	2.5	HTS	topoisomerase inhibitor	TOP2A, TOP2B	NA	NA	CN(C)CCN1C(=O)c2cccc3cc(N)cc(C1=O)c23	Phase 3	K56334280	0.00705182
3273	doxifluridine	2.5	HTS	thymidylate synthase inhibitor	TYMS	oncology	colorectal cancer	C[C@H]1O[C@H]([C@H](O)[C@@H]1O)n1cc(F)c(=O)[nH]c1=O, C[C@H]1O[C@H]([C@H](O)[C@@H]1O)n1cc(F)c(=O)[nH]c1=O	Launched	K58262659	0.000190338
3303	AZ3146	2.5	HTS	monopolar spindle 1 kinase inhibitor	NA	NA	NA	COc1cc(OC2CCN(C)CC2)ccc1Nc1ncc2n(C)c(=O)n(C3CCCC3)c2n1, COc1cc(OC2CCN(C)CC2)ccc1Nc1ncc2n(C)c(=O)n(C3CCCC3)c2n1, COc1cc(OC2CCN(C)CC2)ccc1Nc1ncc2n(C)c(=O)n(C3CCCC3)c2n1	Preclinical	K59146805	0.00586858
3322	methotrexate	2.51	HTS	dihydrofolate reductase inhibitor	DHFR	oncology, hematologic malignancy, dermatology, rheumatology	gestational choriocarcinoma, hydatidiform mole, acute lymphoblastic leukemia (ALL), psoriasis, rheumatoid arthritis	CN(Cc1cnc2nc(N)nc(N)c2n1)c1ccc(cc1)C(=O)N[C@@H](CCC(O)=O)C(O)=O, CN(Cc1cnc2nc(N)nc(N)c2n1)c1ccc(cc1)C(=O)N[C@@H](CCC(O)=O)C(O)=O, CN(Cc1cnc2nc(N)nc(N)c2n1)c1ccc(cc1)C(=O)N[C@@H](CCC(O)=O)C(O)=O, CN(Cc1cnc2nc(N)nc(N)c2n1)c1ccc(cc1)C(=O)NC(CCC(O)=O)C(O)=O	Launched	K59456551	3.56e-05
3390	SB-225002	2.5	HTS	CC chemokine receptor antagonist	CXCR2	NA	NA	Oc1cc(ccc1NC(=O)Nc1ccccc1Br)[N+]([O-])=O, Oc1cc(ccc1NC(=O)Nc1ccccc1Br)[N+]([O-])=O	Preclinical	K61323504	0.00217941
3393	esomeprazole	2.5	HTS	ATPase inhibitor	ATP4A	gastroenterology	gastroesophageal reflux disease (GERD), Zollinger-Ellison syndrome, peptic ulcer disease (PUD)	COc1ccc2[nH]c(nc2c1)[S@@](=O)Cc1ncc(C)c(OC)c1C, COc1ccc2[nH]c(nc2c1)[S@@](=O)Cc1ncc(C)c(OC)c1C, COc1ccc2[nH]c(nc2c1)[S@@](=O)Cc1ncc(C)c(OC)c1C	Launched	K61443506	0.00771648
3405.1	fleroxacin	2.5	HTS	topoisomerase inhibitor	NA	infectious disease, gastroenterology	gonorrhea, enteritis, diarrhea, respiratory tract infections	CN1CCN(CC1)c1c(F)cc2c(c1F)n(CCF)cc(C(O)=O)c2=O, CN1CCN(CC1)c1c(F)cc2c(c1F)n(CCF)cc(C(O)=O)c2=O	Launched	K61717546	0.00613729
3418	AVN-944	2.5	HTS	inosine monophosphate dehydrogenase inhibitor	IMPDH1, IMPDH2	NA	NA	CC[C@H](CC#N)OC(=O)N[C@@H](C)c1cccc(NC(=O)Nc2ccc(-c3cnco3)c(OC)c2)c1	Phase 2	K62196610	0.00557587
3452	PD-98059	2.5	HTS	MEK inhibitor	AKT1, CHEK1, GSK3B, LCK, MAP2K1, MAPK1, MAPK11, MAPK12, MAPK14, MAPK8, PRKCA, RAF1, ROCK1, RPS6KB1, SGK1	NA	NA	COc1cccc(-c2cc(=O)c3ccccc3o2)c1N, COc1cccc(-c2cc(=O)c3ccccc3o2)c1N, COc1cccc(-c2cc(=O)c3ccccc3o2)c1N	Preclinical	K62810658	0.00441532
3453	BMS-265246	2.5	HTS	CDK inhibitor	CDK1, CDK2	NA	NA	CCCCOc1c(cnc2[nH]ncc12)C(=O)c1c(F)cc(C)cc1F, CCCCOc1c(cnc2[nH]ncc12)C(=O)c1c(F)cc(C)cc1F	Preclinical	K62814476	0.00412861
3513	CYC116	2.5	HTS	Aurora kinase inhibitor	AURKA, AURKB, KDR	NA	NA	Cc1nc(N)sc1-c1ccnc(Nc2ccc(cc2)N2CCOCC2)n1, Cc1nc(N)sc1-c1ccnc(Nc2ccc(cc2)N2CCOCC2)n1	Phase 1	K64866502	0.00372484
3543	halobetasol-propionate	2.5	HTS	glucocorticoid receptor agonist	NR3C1, PLA2G1B	dermatology	corticosteroid-responsive dermatoses	CCC(=O)O[C@]1([C@@H](C)C[C@H]2[C@@H]3C[C@H](F)C4=CC(=O)C=C[C@]4(C)[C@]3(F)[C@H](O)C[C@]12C)C(=O)CCl	Launched	K65877271	0.00505125
3587	picotamide	2.5	HTS	thromboxane receptor antagonist, thromboxane synthase inhibitor	TBXA2R	hematology	thrombosis	COc1ccc(cc1C(=O)NCc1cccnc1)C(=O)NCc1cccnc1	Launched	K67277431	0.000754194
3588	SB-431542	2.5	HTS	TGF beta receptor inhibitor	ACVR1C, TGFBR1	NA	NA	NC(=O)c1ccc(cc1)-c1nc(c([nH]1)-c1ccccn1)-c1ccc2OCOc2c1, NC(=O)c1ccc(cc1)-c1nc(c([nH]1)-c1ccccn1)-c1ccc2OCOc2c1, NC(=O)c1ccc(cc1)-c1nc(c([nH]1)-c1ccccn1)-c1ccc2OCOc2c1	Preclinical	K67298865	0.00362995
3595	ku-0063794	2.5	HTS	mTOR inhibitor	MTOR	NA	NA	COc1ccc(cc1CO)-c1ccc2c(nc(nc2n1)N1C[C@H](C)O[C@H](C)C1)N1CCOCC1, COc1ccc(cc1CO)-c1ccc2c(nc(nc2n1)N1C[C@H](C)O[C@H](C)C1)N1CCOCC1	Preclinical	K67566344	0.000108695
3637	dianhydrogalactitol	2.5	HTS	DNA alkylating agent	NA	NA	NA	O[C@@H]([C@@H](O)[C@H]1CO1)[C@@H]1CO1	Phase 1	K68502831	0.00354185
3639	SB-743921	2.5	HTS	kinesin-like spindle protein inhibitor	KIF11	NA	NA	CC(C)[C@@H](N(CCCN)C(=O)c1ccc(C)cc1)c1oc2cc(Cl)ccc2c(=O)c1Cc1ccccc1, CC(C)[C@@H](N(CCCN)C(=O)c1ccc(C)cc1)c1oc2cc(Cl)ccc2c(=O)c1Cc1ccccc1	Phase 1/Phase 2	K68532323	0.000892693
3641	12-O-tetradecanoylphorbol-13-acetate	2.03	HTS	PKC activator	KCNT2, TRPV4	NA	NA	CCCCCCCCCCCCCC(=O)O[C@@H]1[C@@H](C)[C@]2(O)[C@@H]3C=C(C)C(=O)[C@@]3(O)CC(CO)=C[C@H]2[C@@H]2C(C)(C)[C@]12OC(C)=O	Phase 2	K68552125	0.00920766
3649	PF-03814735	2.5	HTS	Aurora kinase inhibitor	AURKA, AURKB	NA	NA	CC(=O)NCC(=O)N1[C@H]2CC[C@@H]1c1cc(Nc3ncc(c(NC4CCC4)n3)C(F)(F)F)ccc21, CC(=O)NCC(=O)N1[C@H]2CC[C@@H]1c1cc(Nc3ncc(c(NC4CCC4)n3)C(F)(F)F)ccc21	Phase 1	K68747584	0.00328509
3683	mericitabine	2.5	HTS	HCV inhibitor	NA	NA	NA	CC(C)C(=O)OC[C@H]1O[C@@H](n2ccc(N)nc2=O)[C@](C)(F)[C@@H]1OC(=O)C(C)C	Phase 2	K69726595	2.35e-05
3699	benzoxiquine	2.5	HTS	antiinfective drug	NA	NA	NA	O=C(Oc1cccc2cccnc12)c1ccccc1	Preclinical	K70327191	0.00100287
3768	AZD5438	2.5	HTS	CDK inhibitor	KCNH2	NA	NA	CC(C)n1c(C)ncc1-c1ccnc(Nc2ccc(cc2)S(C)(=O)=O)n1, CC(C)n1c(C)ncc1-c1ccnc(Nc2ccc(cc2)S(C)(=O)=O)n1, CC(C)n1c(C)ncc1-c1ccnc(Nc2ccc(cc2)S(C)(=O)=O)n1	Phase 1	K72414522	0.00705182
3823	HC-030031	2.5	HTS	TRPA1 channel blocker	TRPA1	NA	NA	CC(C)c1ccc(NC(=O)Cn2cnc3n(C)c(=O)n(C)c(=O)c23)cc1	Phase 1	K73815512	0.00195556
3852	SCH-900776	2.43	HTS	CHK inhibitor	CDK2, CHEK1	NA	NA	Cn1cc(cn1)-c1cnn2c(N)c(Br)c(nc12)[C@@H]1CCCNC1, Cn1cc(cn1)-c1cnn2c(N)c(Br)c(nc12)[C@@H]1CCCNC1	Phase 2	K75009076	0.000439881
3904	YM-155	2.5	HTS	survivin inhibitor	BIRC5	NA	NA	COCCn1c2c(C(=O)c3ccccc3C2=O)[n+](Cc2cnccn2)c1C, COCCn1c2c(C(=O)c3ccccc3C2=O)[n+](Cc2cnccn2)c1C	Phase 2	K76703230	0.00896062
3919	WYE-354	2.5	HTS	mTOR inhibitor	MTOR	NA	NA	COC(=O)Nc1ccc(cc1)-c1nc(N2CCOCC2)c2cnn(C3CCN(CC3)C(=O)OC)c2n1	Preclinical	K77008974	0.00896062
3937	A205804	2.5	HTS	ICAM1 expression inhibitor	ICAM1, SELE	NA	NA	Cc1ccc(Sc2cncc3sc(cc23)C(N)=O)cc1, Cc1ccc(Sc2cncc3sc(cc23)C(N)=O)cc1, Cc1ccc(Sc2cncc3sc(cc23)C(N)=O)cc1	Preclinical	K77627880	0.00243309
3951	entinostat	2.5	HTS	HDAC inhibitor	HDAC1, HDAC2, HDAC3, HDAC9	NA	NA	Nc1ccccc1NC(=O)c1ccc(CNC(=O)OCc2cccnc2)cc1, Nc1ccccc1NC(=O)c1ccc(CNC(=O)OCc2cccnc2)cc1	Phase 3	K77908580	0.00362995
3958	LY2090314	2.5	HTS	glycogen synthase kinase inhibitor	GSK3B	NA	NA	Fc1cc2CN(CCn3cc(C4=C(C(=O)NC4=O)c4cnc5ccccn45)c(c1)c23)C(=O)N1CCCCC1	Phase 2	K78055238	0.00335587
3993	oxaliplatin	2.5	HTS	DNA inhibitor	NA	oncology	colorectal cancer	O=C1O[Pt]2(N[C@@H]3CCCC[C@H]3N2)OC1=O, O=C1O[Pt]2(N[C@@H]3CCCC[C@H]3N2)OC1=O, O=C1O[Pt]2(N[C@@H]3CCCC[C@H]3N2)OC1=O, O=C1O[Pt]2(N[C@@H]3CCCC[C@H]3N2)OC1=O	Launched	K78960041	0.000319185
3993.1	oxaliplatin	2.5	HTS	DNA inhibitor	NA	oncology	colorectal cancer	O=C1O[Pt]2(N[C@@H]3CCCC[C@H]3N2)OC1=O, O=C1O[Pt]2(N[C@@H]3CCCC[C@H]3N2)OC1=O, O=C1O[Pt]2(N[C@@H]3CCCC[C@H]3N2)OC1=O, O=C1O[Pt]2(N[C@@H]3CCCC[C@H]3N2)OC1=O	Launched	K78960041	0.00399896
4005	decitabine	2.5	HTS	DNA methyltransferase inhibitor	DNMT1, DNMT3A	hematologic malignancy, hematology	myelodysplastic diseases (MDS), anemia, chronic myeloid leukemia (CML)	Nc1ncn([C@H]2C[C@H](O)[C@@H](CO)O2)c(=O)n1, Nc1ncn([C@H]2C[C@H](O)[C@@H](CO)O2)c(=O)n1, Nc1ncn([C@H]2C[C@H](O)[C@@H](CO)O2)c(=O)n1	Launched	K79254416	0.00268015
4017	inosine	2.62	HTS	neurotrophic agent	PARP1, PNP	NA	NA	OC[C@H]1O[C@H]([C@H](O)[C@@H]1O)n1cnc2c(O)ncnc12, OC[C@H]1O[C@H]([C@H](O)[C@@H]1O)n1cnc2c(O)ncnc12, OC[C@H]1O[C@H]([C@H](O)[C@@H]1O)n1cnc2c(O)ncnc12	Launched	K79612754	0.00886551
4022	UBP-302	2.5	HTS	glutamate receptor antagonist	GRIK1	NA	NA	N[C@@H](Cn1ccc(=O)n(Cc2ccccc2C(O)=O)c1=O)C(O)=O, N[C@@H](Cn1ccc(=O)n(Cc2ccccc2C(O)=O)c1=O)C(O)=O, N[C@@H](Cn1ccc(=O)n(Cc2ccccc2C(O)=O)c1=O)C(O)=O	Preclinical	K79753741	0.00335587
4147	alogliptin	2.35	HTS	dipeptidyl peptidase inhibitor	DPP4	endocrinology	diabetes mellitus	Cn1c(=O)cc(N2CCCC(N)C2)n(Cc2ccccc2C#N)c1=O, Cn1c(=O)cc(N2CCC[C@@H](N)C2)n(Cc2ccccc2C#N)c1=O, Cn1c(=O)cc(N2CCC[C@@H](N)C2)n(Cc2ccccc2C#N)c1=O	Launched	K83003151	4.6e-06
4170	avagacestat	2.5	HTS	gamma secretase inhibitor	PSEN1	NA	NA	NC(=O)[C@@H](CCC(F)(F)F)N(Cc1ccc(cc1F)-c1ncon1)S(=O)(=O)c1ccc(Cl)cc1	Phase 2	K83720053	0.00326216
4225	AZD2858	2.5	HTS	glycogen synthase kinase inhibitor	GSK3B	NA	NA	CN1CCN(CC1)S(=O)(=O)c1ccc(cc1)-c1cnc(N)c(n1)C(=O)Nc1cccnc1	Preclinical	K85849709	0.00557587
4243.1	AZD7762	2.5	HTS	CHK inhibitor	CHEK1, CHEK2	NA	NA	NC(=O)Nc1cc(sc1C(=O)N[C@H]1CCCNC1)-c1cccc(F)c1, NC(=O)Nc1cc(sc1C(=O)N[C@H]1CCCNC1)-c1cccc(F)c1, NC(=O)Nc1cc(sc1C(=O)N[C@H]1CCCNC1)-c1cccc(F)c1	Phase 1	K86525559	0.00243081
4259	asunaprevir	2.5	HTS	HCV inhibitor	NA	NA	NA	COc1cnc(O[C@@H]2C[C@H](N(C2)C(=O)[C@@H](NC(=O)OC(C)(C)C)C(C)(C)C)C(=O)N[C@@]2(C[C@H]2C=C)C(=O)NS(=O)(=O)C2CC2)c2cc(Cl)ccc12	Phase 3	K87028197	0.00335587
4296	pyrimethamine	2.5	HTS	dihydrofolate reductase inhibitor	DHFR, SLC47A1	infectious disease	malaria	CCc1nc(N)nc(N)c1-c1ccc(Cl)cc1, CCc1nc(N)nc(N)c1-c1ccc(Cl)cc1, CCc1nc(N)nc(N)c1-c1ccc(Cl)cc1, CCc1nc(N)nc(N)c1-c1ccc(Cl)cc1	Launched	K88429204	0.008434
4300	benurestat	2.5	HTS	urease inhibitor	NA	NA	NA	ONC(=O)CNC(=O)c1ccc(Cl)cc1	Phase 1	K88553858	0.00534405
4358	AR-12	2.5	HTS	phosphoinositide dependent kinase inhibitor	PDPK1	NA	NA	NCC(=O)Nc1ccc(cc1)-n1nc(cc1-c1ccc2c(ccc3ccccc23)c1)C(F)(F)F, NCC(=O)Nc1ccc(cc1)-n1nc(cc1-c1ccc2c(ccc3ccccc23)c1)C(F)(F)F, NCC(=O)Nc1ccc(cc1)-n1nc(cc1-c1ccc2c(ccc3ccccc23)c1)C(F)(F)F, NCC(=O)Nc1ccc(cc1)-n1nc(cc1-c1ccc2c(ccc3ccccc23)c1)C(F)(F)F	Phase 1	K90497590	0.00557587
4376	telcagepant	2.5	HTS	calcitonin antagonist	CALCRL, RAMP1	NA	NA	Fc1cccc([C@@H]2CC[C@@H](NC(=O)N3CCC(CC3)n3c4cccnc4[nH]c3=O)C(=O)N(CC(F)(F)F)C2)c1F	Phase 3	K91159026	0.000892693
4388	piceatannol	2.5	HTS	SYK inhibitor	ATP5A1, ATP5B, ATP5C1, IRF3	NA	NA	Oc1cc(O)cc(c1)\C=C\c1ccc(O)c(O)c1, Oc1cc(O)cc(c1)\C=C\c1ccc(O)c(O)c1, Oc1cc(O)cc(c1)\C=C\c1ccc(O)c(O)c1	Preclinical	K91509126	0.00241608
4426	zaleplon	2.5	HTS	benzodiazepine receptor agonist	GABRA1, GABRB1, GABRG2, TSPO	neurology/psychiatry	insomnia	CCN(C(C)=O)c1cccc(c1)-c1ccnc2c(cnn12)C#N	Launched	K92657060	0.00771648
4437	tirapazamine	2.5	HTS	DNA inhibitor	NA	NA	NA	Nc1n[n+]([O-])c2ccccc2[n+]1[O-], Nc1n[n+]([O-])c2ccccc2[n+]1[O-]	Phase 3	K92968657	0.00268015
4443	cladribine	2.5	HTS	adenosine deaminase inhibitor, ribonucleotide reductase inhibitor	ADA, PNP, POLA1, POLE, POLE2, POLE3, POLE4, RRM1, RRM2, RRM2B	hematologic malignancy	hairy cell leukemia	Nc1nc(Cl)nc2n(cnc12)[C@H]1C[C@H](O)[C@@H](CO)O1	Launched	K93034159	0.00920766
4460	hydrocortisone	2.5	HTS	glucocorticoid receptor agonist	NA	dermatology, neurology/psychiatry	eczema, psoriasis, seborrheic dermatitis, itching	C[C@]12C[C@H](O)[C@H]3[C@@H](CCC4=CC(=O)CC[C@]34C)[C@@H]1CC[C@]2(O)C(=O)CO, C[C@]12C[C@H](O)[C@H]3[C@@H](CCC4=CC(=O)CC[C@]34C)[C@@H]1CC[C@]2(O)C(=O)CO, C[C@]12C[C@H](O)[C@H]3[C@@H](CCC4=CC(=O)CC[C@]34C)[C@@H]1CC[C@]2(O)C(=O)CO	Launched	K93568044	0.00557587
4516	RN-1734	2.5	HTS	TRPV antagonist	TRPV4	NA	NA	CC(C)NCCN(C(C)C)S(=O)(=O)c1ccc(Cl)cc1Cl, CC(C)NCCN(C(C)C)S(=O)(=O)c1ccc(Cl)cc1Cl	Preclinical	K95581532	0.00412861
4538	brequinar	2.5	HTS	dihydroorotate dehydrogenase inhibitor	DHODH	NA	NA	Cc1c(nc2ccc(F)cc2c1C(O)=O)-c1ccc(cc1)-c1ccccc1F	Phase 2	K96123349	0.00586858
4623	desoxycortone	2.5	HTS	mineralocorticoid receptor agonist	NR3C1, NR3C2	NA	NA	C[C@]12CC[C@H]3[C@@H](CCC4=CC(=O)CC[C@]34C)[C@@H]1CC[C@@H]2C(=O)CO	Preclinical	K98521173	0.00586858
4631	SB-2343	2.5	HTS	mTOR inhibitor, PI3K inhibitor	MTOR, PIK3CA, PIK3CB, PIK3CD, PIK3CG	NA	NA	CC(C)n1c(C)nc2c(nc(nc12)N1CCOCC1)-c1cnc(N)nc1	Phase 1	K98795921	0.0045698
4646	ftorafur	2.5	HTS	thymidylate synthase inhibitor	TYMS	oncology	colorectal cancer	Fc1cn([C@H]2CCCO2)c(=O)[nH]c1=O, Fc1cn([C@H]2CCCO2)c(=O)[nH]c1=O	Launched	K99383816	0.00100287
4646.1	ftorafur	2.5	HTS	thymidylate synthase inhibitor	TYMS	oncology	colorectal cancer	Fc1cn([C@H]2CCCO2)c(=O)[nH]c1=O, Fc1cn([C@H]2CCCO2)c(=O)[nH]c1=O	Launched	K99383816	0.0040514
4649	genz-644282	2.5	HTS	topoisomerase inhibitor	TOP1	NA	NA	CNCCn1c2c(cnc3cc4OCOc4cc23)c2cc(OC)c(OC)cc2c1=O	Phase 1	K99475619	0.00981473
136	PF-03049423	2.5	MTS004	phosphodiesterase inhibitor	PDE5A	NA	NA	CCCOCCn1c2cc(ncc2nc(N2CCN(CCO)CC2)c1=O)-c1ccc(OC)nc1	Phase 2	K07070922	0.00920766
205	fosaprepitant-dimeglumine	2.5	MTS004	tachykinin antagonist	TACR1	gastroenterology	nausea, vomiting	C[C@@H](O[C@H]1OCCN(Cc2nn(c(=O)[nH]2)P(O)(O)=O)[C@H]1c1ccc(F)cc1)c1cc(cc(c1)C(F)(F)F)C(F)(F)F, C[C@@H](O[C@H]1OCCN(Cc2nn(c(=O)[nH]2)P(O)(O)=O)[C@H]1c1ccc(F)cc1)c1cc(cc(c1)C(F)(F)F)C(F)(F)F, C[C@@H](O[C@H]1OCCN(Cc2nn(c(=O)[nH]2)P(O)(O)=O)[C@H]1c1ccc(F)cc1)c1cc(cc(c1)C(F)(F)F)C(F)(F)F, C[C@@H](O[C@H]1OCCN(Cc2nn(c(=O)[nH]2)P(O)(O)=O)[C@H]1c1ccc(F)cc1)c1cc(cc(c1)C(F)(F)F)C(F)(F)F	Launched	K23848629	1.41e-05
234	chidamide	2.49997	MTS004	HDAC inhibitor	HDAC10, HDAC3	NA	NA	Nc1ccc(F)cc1NC(=O)c1ccc(CNC(=O)\C=C\c2cccnc2)cc1	Launched	K28537285	0.00534405
247	pemetrexed	2.5	MTS004	dihydrofolate reductase inhibitor, thymidylate synthase inhibitor	ATIC, DHFR, GART, TYMS	oncology	non-small cell lung cancer (NSCLC), mesothelioma	Nc1nc(=O)c2c(CCc3ccc(cc3)C(=O)N[C@@H](CCC(O)=O)C(O)=O)c[nH]c2[nH]1, Nc1nc(=O)c2c(CCc3ccc(cc3)C(=O)N[C@@H](CCC(O)=O)C(O)=O)c[nH]c2[nH]1, Nc1nc(=O)c2c(CCc3ccc(cc3)C(=O)N[C@@H](CCC(O)=O)C(O)=O)c[nH]c2[nH]1, Nc1nc(=O)c2c(CCc3ccc(cc3)C(=O)N[C@@H](CCC(O)=O)C(O)=O)c[nH]c2[nH]1, Nc1nc(=O)c2c(CCc3ccc(cc3)C(=O)N[C@@H](CCC(O)=O)C(O)=O)c[nH]c2[nH]1, Nc1nc(=O)c2c(CCc3ccc(cc3)C(=O)N[C@@H](CCC(O)=O)C(O)=O)c[nH]…	Launched	K32842773	0.000793423
359	clobetasone-butyrate	2.56459	MTS004	corticosteroid agonist	NR3C1	dermatology	eczema, psoriasis, dermatitis	CCCC(=O)O[C@@]1([C@@H](C)C[C@H]2[C@@H]3CCC4=CC(=O)C=C[C@]4(C)[C@@]3(F)C(=O)C[C@]12C)C(=O)CCl	Launched	K58810291	0.00400594
378	PI3K-IN-2	2.49997	MTS004	PI3K inhibitor	NA	NA	NA	Nc1cc(c(cn1)-c1nc(nc(n1)N1CCOCC1)N1CCOCC1)C(F)(F)F	Phase 2	K62374002	0.00771648
398	carboxyamidotriazole	2.42064	MTS004	calcium channel blocker	CXCL8	NA	NA	NC(=O)c1nnn(Cc2cc(Cl)c(C(=O)c3ccc(Cl)cc3)c(Cl)c2)c1N	Phase 3	K68408772	0.000623893
404	AGN-194310	2.49997	MTS004	retinoid receptor antagonist	RXRA, RXRB, RXRG	NA	NA	CCc1ccc(cc1)C1=CC(C)(C)Sc2ccc(cc12)C#Cc1ccc(cc1)C(O)=O	Phase 3	K70262971	2.77e-05
442	abafungin	2.71597	MTS004	sterol methyltransferase inhibitor	NA	NA	NA	Cc1ccc(Oc2ccccc2-c2csc(N=C3NCCCN3)n2)c(C)c1	Phase 3	K77432251	0.00705182
459	JTE-607	2.5	MTS004	cytokine production inhibitor	IL10, IL1B, IL6, TNF	NA	NA	CCOC(=O)[C@H](Cc1ccccc1)NC(=O)c1cc(Cl)c(OCCN2CCN(C)CC2)c(Cl)c1O, CCOC(=O)[C@H](Cc1ccccc1)NC(=O)c1cc(Cl)c(OCCN2CCN(C)CC2)c(Cl)c1O	Phase 2	K81405859	0.000793423

## Sheet: TAZ-differential drugs
	name	dose	screen_id	moa	target	disease.area	indication	smiles	phase	broad_id_trimmed	P-value
629	strychnine	2.5	HTS	acetylcholine receptor antagonist	CHRM1, CHRM2, CHRM3, CHRM4, CHRM5, CHRNA10, CHRNA9, GLRA1, GLRA2, GLRA3, GLRB	NA	NA	O=C1CC2OCC=C3CN4CC[C@@]56C4C[C@@H]3[C@@H]2C5N1c1ccccc61	Preclinical	A09094913	0.00542576
785	isamoltane	2.5	HTS	adrenergic receptor antagonist	HTR1A, HTR1B	NA	NA	CC(C)NCC(O)COc1ccccc1-n1cccc1	Phase 1	A26845397	0.000633351
835	fluoxetine	2.5	HTS	selective serotonin reuptake inhibitor (SSRI)	ANO1, HTR2B, SLC6A4	neurology/psychiatry	depression, obsessive compulsive disorder (OCD), bulimia nervosa, panic disorders, bipolar disorder	CNCCC(Oc1ccc(cc1)C(F)(F)F)c1ccccc1, CNCCC(Oc1ccc(cc1)C(F)(F)F)c1ccccc1, CNCCC(Oc1ccc(cc1)C(F)(F)F)c1ccccc1, CNCCC(Oc1ccc(cc1)C(F)(F)F)c1ccccc1	Launched	A31159102	0.00181213
1414	AMG-9810	2.5	HTS	TRPV antagonist	TRPV1	NA	NA	CC(C)(C)c1ccc(cc1)\C=C\C(=O)Nc1ccc2OCCOc2c1, CC(C)(C)c1ccc(cc1)\C=C\C(=O)Nc1ccc2OCCOc2c1	Preclinical	K01995783	0.0060053
1444	SU-11274	2.5	HTS	hepatocyte growth factor receptor inhibitor, tyrosine kinase inhibitor	MET	NA	NA	CN(c1cccc(Cl)c1)S(=O)(=O)c1ccc2NC(=O)\C(=C/c3[nH]c(C)c(C(=O)N4CCN(C)CC4)c3C)c2c1, CN(c1cccc(Cl)c1)S(=O)(=O)c1ccc2NC(=O)\C(=C/c3[nH]c(C)c(C(=O)N4CCN(C)CC4)c3C)c2c1	Preclinical	K02965346	0.00224139
1554	promazine	2.5	HTS	dopamine receptor antagonist	ADRA1A, ADRA1B, ADRA1D, CHRM1, CHRM2, CHRM3, CHRM4, CHRM5, DRD1, DRD2, DRD3, DRD4, HRH1, HTR2A, HTR2C	neurology/psychiatry	schizophrenia	CN(C)CCCN1c2ccccc2Sc2ccccc12, CN(C)CCCN1c2ccccc2Sc2ccccc12	Launched	K06980535	0.00833572
1592	danoprevir	2.5	HTS	HCV inhibitor	NA	NA	NA	CC(C)(C)OC(=O)N[C@H]1CCCCC\C=C/[C@@H]2C[C@]2(NC(=O)[C@@H]2C[C@H](CN2C1=O)OC(=O)N1Cc2cccc(F)c2C1)C(=O)NS(=O)(=O)C1CC1	Phase 2	K08111240	0.0049801
1867	lobendazole	2.5	HTS	anthelmintic agent	NA	NA	NA	CCOC(=O)Nc1nc2ccccc2[nH]1	Preclinical	K15834839	0.00706936
2081	U-18666A	2.5	HTS	oxidosqualene cyclase inhibitor	NA	NA	NA	CCN(CC)CCO[C@H]1CC[C@]2(C)[C@H]3CC[C@@]4(C)[C@@H](CCC4=O)[C@@H]3CC=C2C1	Preclinical	K22025381	9.39e-05
2218	DMAB-anabaseine	2.5	HTS	adrenergic receptor agonist	CHRNA7	NA	NA	CN(C)c1ccc(cc1)\C=C1CCCN=C/1c1cccnc1, CN(C)c1ccc(cc1)\C=C1CCCN=C/1c1cccnc1	Preclinical	K26573499	0.0018853
2351	timolol	2.5	HTS	adrenergic receptor antagonist	ADRB1, ADRB2	ophthalmology	ocular hypertension, glaucoma	CC(C)(C)NC[C@@H](O)COc1nsnc1N1CCOCC1, CC(C)(C)NC[C@H](O)COc1nsnc1N1CCOCC1, CC(C)(C)NC[C@H](O)COc1nsnc1N1CCOCC1	Launched	K30421593	0.000890905
2365	levothyroxine	2.5	HTS	thyroid hormone stimulant	THRA, THRB	endocrinology	myxedema coma	N[C@@H](Cc1cc(I)c(Oc2cc(I)c(O)c(I)c2)c(I)c1)C(O)=O, N[C@@H](Cc1cc(I)c(Oc2cc(I)c(O)c(I)c2)c(I)c1)C(O)=O, N[C@@H](Cc1cc(I)c(Oc2cc(I)c(O)c(I)c2)c(I)c1)C(O)=O, N[C@@H](Cc1cc(I)c(Oc2cc(I)c(O)c(I)c2)c(I)c1)C(O)=O	Launched	K30685142	0.00939441
2371	FR-122047	2.5	HTS	cyclooxygenase inhibitor	NA	NA	NA	COc1ccc(cc1)-c1nc(sc1-c1ccc(OC)cc1)C(=O)N1CCN(C)CC1	Preclinical	K30990140	0.00838838
2445	obidoxime	2.5	HTS	cholinesterase reactivator	ACHE	critical care, neurology/psychiatry	poison antidote, nerve gas poisoning	O\N=C\c1cc[n+](COC[n+]2ccc(cc2)\C=N\O)cc1	Launched	K33588785	0.00679351
2577	MRS-1220	2.5	HTS	adenosine receptor antagonist	ADORA2B, ADORA3	NA	NA	Clc1ccc2nc(NC(=O)Cc3ccccc3)n3nc(nc3c2c1)-c1ccco1, Clc1ccc2nc(NC(=O)Cc3ccccc3)n3nc(nc3c2c1)-c1ccco1	Preclinical	K37618799	0.000239255
2656	bisacodyl	2.5	HTS	laxative	NA	gastroenterology	constipation	CC(=O)Oc1ccc(cc1)C(c1ccc(OC(C)=O)cc1)c1ccccn1, CC(=O)Oc1ccc(cc1)C(c1ccc(OC(C)=O)cc1)c1ccccn1	Launched	K39987650	0.00706936
2796	dexniguldipine	2.5	HTS	calmodulin antagonist	ADORA3	NA	NA	COC(=O)C1=C(C)NC(C)=C([C@@H]1c1cccc(c1)[N+]([O-])=O)C(=O)OCCCN1CCC(CC1)(c1ccccc1)c1ccccc1	Phase 2	K44309363	0.00860991
2862	RS-67333	2.5	HTS	serotonin receptor partial agonist	HTR4	NA	NA	CCCCN1CCC(CCC(=O)c2cc(Cl)c(N)cc2OC)CC1	Preclinical	K46142322	0.00593248
2900	talnetant	2.5	HTS	tachykinin antagonist	TACR2, TACR3	NA	NA	CC[C@H](NC(=O)c1c(O)c(nc2ccccc12)-c1ccccc1)c1ccccc1	Phase 2	K47095176	0.00275759
3000	benazepril	2.5	HTS	angiotensin converting enzyme inhibitor	ACE	cardiology	hypertension	CCOC(=O)[C@H](CCc1ccccc1)N[C@H]1CCc2ccccc2N(CC(O)=O)C1=O, CCOC(=O)[C@H](CCc1ccccc1)N[C@H]1CCc2ccccc2N(CC(O)=O)C1=O, CCOC(=O)[C@H](CCc1ccccc1)N[C@H]1CCc2ccccc2N(CC(O)=O)C1=O, CCOC(=O)[C@H](CCc1ccccc1)N[C@H]1CCc2ccccc2N(CC(O)=O)C1=O	Launched	K49807096	0.00337509
3455	6-benzylaminopurine	2.5	HTS	purinergic receptor activator	NA	NA	NA	N(Cc1ccccc1)c1ncnc2nc[nH]c12	Preclinical	K62929068	0.00341465
3534	icariin	2.5	HTS	phosphodiesterase inhibitor	PDE5A	NA	NA	COc1ccc(cc1)-c1oc2c(CC=C(C)C)c(O[C@@H]3O[C@H](CO)[C@@H](O)[C@H](O)[C@H]3O)cc(O)c2c(=O)c1O[C@@H]1O[C@@H](C)[C@H](O)[C@@H](O)[C@H]1O, COc1ccc(cc1)-c1oc2c(CC=C(C)C)c(O[C@@H]3O[C@H](CO)[C@@H](O)[C@H](O)[C@H]3O)cc(O)c2c(=O)c1O[C@@H]1O[C@@H](C)[C@H](O)[C@@H](O)[C@H]1O	Phase 3	K65639003	0.00201673
3587	picotamide	2.5	HTS	thromboxane receptor antagonist, thromboxane synthase inhibitor	TBXA2R	hematology	thrombosis	COc1ccc(cc1C(=O)NCc1cccnc1)C(=O)NCc1cccnc1	Launched	K67277431	0.00860991
3595	ku-0063794	2.5	HTS	mTOR inhibitor	MTOR	NA	NA	COc1ccc(cc1CO)-c1ccc2c(nc(nc2n1)N1C[C@H](C)O[C@H](C)C1)N1CCOCC1, COc1ccc(cc1CO)-c1ccc2c(nc(nc2n1)N1C[C@H](C)O[C@H](C)C1)N1CCOCC1	Preclinical	K67566344	0.00248777
3708	doxofylline	2.5	HTS	adenosine receptor antagonist	ADORA1, PDE4A, PDE4B, PDE4C, PDE4D	pulmonary	asthma	Cn1c2ncn(CC3OCCO3)c2c(=O)n(C)c1=O, Cn1c2ncn(CC3OCCO3)c2c(=O)n(C)c1=O	Launched	K70507123	0.00912319
3832	cytisine	2.5	HTS	acetylcholine receptor agonist	CHRNA2, CHRNA3, CHRNA4, CHRNA6, CHRNA7, CHRNB2, CHRNB4	neurology/psychiatry	nicotinism	O=c1cccc2[C@H]3CNC[C@H](C3)Cn12, O=c1cccc2[C@H]3CNC[C@H](C3)Cn12, O=c1cccc2[C@H]3CNC[C@H](C3)Cn12, O=c1cccc2[C@H]3CNC[C@H](C3)Cn12	Launched	K74186897	0.00425374
3834	resorcinol	2.5	HTS	phosphodiesterase inhibitor	CA12, CA14, CA2, PTGS1	dermatology	acne vulgaris (AV), eczema, psoriasis, seborrheic dermatitis	Oc1cccc(O)c1	Launched	K74190368	0.00044875
3882	r(-)-apomorphine	2.5	HTS	dopamine receptor agonist	DRD2, HTR5A	neurology/psychiatry	Parkinson's Disease	CN1CCc2cccc-3c2C1Cc1ccc(O)c(O)c-31, CN1CCc2cccc-3c2[C@H]1Cc1ccc(O)c(O)c-31, CN1CCc2cccc-3c2[C@H]1Cc1ccc(O)c(O)c-31	Launched	K76022557	0.00658277
3950	U-104	2.5	HTS	carbonic anhydrase inhibitor	CA1, CA12, CA2, CA9	NA	NA	NS(=O)(=O)c1ccc(NC(=O)Nc2ccc(F)cc2)cc1, NS(=O)(=O)c1ccc(NC(=O)Nc2ccc(F)cc2)cc1	Preclinical	K77867004	0.00991213
4008	erythritol	2.5	HTS	NA	NA	NA	NA	OC[C@H](O)[C@H](O)CO, OC[C@H](O)[C@H](O)CO	Launched	K79315489	0.00887204
4263	OSI-027	2.5	HTS	mTOR inhibitor	MTOR	NA	NA	COc1cccc2cc([nH]c12)-c1nc([C@H]2CC[C@@H](CC2)C(O)=O)n2ncnc(N)c12, COc1cccc2cc([nH]c12)-c1nc([C@H]2CC[C@@H](CC2)C(O)=O)n2ncnc(N)c12	Phase 1	K87124298	0.00770473
4319	chlorocresol	2.5	HTS	ryanodine receptor activator	NA	infectious disease	first-aid antiseptic	Cc1cc(O)ccc1Cl, Cc1cc(O)ccc1Cl, Cc1cc(O)ccc1Cl	Launched	K89056082	0.00452353
4420	oxandrolone	2.5	HTS	androgen receptor agonist	AR	endocrinology	weight-gain aid	C[C@]1(O)CC[C@H]2[C@@H]3CC[C@H]4CC(=O)OC[C@]4(C)[C@H]3CC[C@]12C	Launched	K92467929	0.000307958
4487.1	mevastatin	2.6	HTS	HMGCR inhibitor	HMGCR	NA	NA	CC[C@H](C)C(=O)O[C@H]1CCC=C2C=C[C@H](C)[C@H](CC[C@@H]3C[C@@H](O)CC(=O)O3)[C@@H]12, CC[C@H](C)C(=O)O[C@H]1CCC=C2C=C[C@H](C)[C@H](CC[C@@H]3C[C@@H](O)CC(=O)O3)[C@@H]12, CC[C@H](C)C(=O)O[C@H]1CCC=C2C=C[C@H](C)[C@H](CC[C@@H]3C[C@@H](O)CC(=O)O3)[C@@H]12, CC[C@H](C)C(=O)O[C@H]1CCC=C2C=C[C@H](C)[C@H](CC[C@@H]3C[C@@H](O)CC(=O)O3)[C@@H]12, CC[C@H](C)C(=O)O[C@H]1CCC=C2C=C[C@H](C)[C@H](CC[C@@H]3C[C@@H](O)CC(…	Preclinical	K94441233	0.00181213
4646.1	ftorafur	2.5	HTS	thymidylate synthase inhibitor	TYMS	oncology	colorectal cancer	Fc1cn([C@H]2CCCO2)c(=O)[nH]c1=O, Fc1cn([C@H]2CCCO2)c(=O)[nH]c1=O	Launched	K99383816	0.0055023
70	picartamide	2.5	MTS004	H+/K+-ATPase inhibitor	ATP4A	NA	NA	CNC(=S)C1(CCCS1)c1ccccn1	Phase 2	A71765060	0.00770473
183	cinoxate	2.53614	MTS004	NA	NA	dermatology	sunscreen lotion	CCOCCOC(=O)\C=C\c1ccc(OC)cc1	Launched	K17828029	0.00310198
301	presatovir	2.49999	MTS004	RSV fusion inhibitor	NA	NA	NA	Cc1cn2nc(cc2nc1N1CC[C@H](N)C1)[C@@H]1CCCCN1C(=O)c1cc(Cl)ccc1NS(C)(=O)=O	Phase 2	K45906612	0.00912319
