# Supplementary material for: A Division of Labor between YAP and TAZ in Non–Small Cell Lung Cancer
Source: Oxford University Press journal article supplement (doi:10.1158/0008-5472.can-20-0125), 2020-08-14
Supplement: 00085472can200125-sup-235469_2_supp_6451212_q1jr2t.xlsx [file 00085472can200125-sup-235469_2_supp_6451212_q1jr2t.xlsx]

## Sheet: TAZ-regulated genes
_MEMBER_Input ID	_LogP_Input ID	GO	_PATTERN_	_RANK_	GiniIndex	Category	CategoryID	Description	LogP	Enrichment	Z-score	#TotalGeneInLibrary	#GeneInGO	#GeneInHitList	#GeneInGOAndHitList	%InGO	STDV %InGO	GeneID	Hits	Log(q-value)	EvidenceCutoff	GROUP_ID	FirstInGroupByEnrichment	FirstInGroupByLogP	BestLogPInGroup	BestEnrichmentInGroup	URL
1	-7.74401	GO:0043062	M1	1	0	GO Biological Processes	19	extracellular structure organization	-7.74401	4.38802	7.52014	24155	425	272	21	7.72059	1.61843	19|185|1295|1490|3037|3383|3696|3909|4312|4313|4319|4320|4323|4629|7092|7133|7450|8728|60484|140766|169611	ABCA1|AGTR1|COL8A1|CCN2|HAS2|ICAM1|ITGB8|LAMA3|MMP1|MMP2|MMP10|MMP11|MMP14|MYH11|TLL1|TNFRSF1B|VWF|ADAM19|HAPLN2|ADAMTS14|OLFML2A	-3.81704	0	1	1	1	-7.74401	11.3368
1	-7.31865	GO:0030198	M1	1	0	GO Biological Processes	19	extracellular matrix organization	-7.31865	4.56026	7.36489	24155	370	272	19	6.98529	1.54555	1295|1490|3037|3383|3696|3909|4312|4313|4319|4320|4323|4629|7092|7133|7450|8728|60484|140766|169611	COL8A1|CCN2|HAS2|ICAM1|ITGB8|LAMA3|MMP1|MMP2|MMP10|MMP11|MMP14|MYH11|TLL1|TNFRSF1B|VWF|ADAM19|HAPLN2|ADAMTS14|OLFML2A	-3.81704	0	1	0	0	-7.74401	11.3368
1	-7.67617	GO:0001822	M1	1	0	GO Biological Processes	19	kidney development	-7.67617	5.41107	7.9086	24155	279	272	17	6.25	1.46771	59|185|1636|2028|2246|2736|3037|5629|6469|6659|7477|8829|25937|28514|55083|64220|80144	ACTA2|AGTR1|ACE|ENPEP|FGF1|GLI2|HAS2|PROX1|SHH|SOX4|WNT7B|NRP1|WWTR1|DLL1|KIF26B|STRA6|FRAS1	-3.81704	0	2	1	1	-7.67617	8.32548
1	-7.34368	GO:0072001	M1	1	0	GO Biological Processes	19	renal system development	-7.34368	5.13499	7.6127	24155	294	272	17	6.25	1.46771	59|185|1636|2028|2246|2736|3037|5629|6469|6659|7477|8829|25937|28514|55083|64220|80144	ACTA2|AGTR1|ACE|ENPEP|FGF1|GLI2|HAS2|PROX1|SHH|SOX4|WNT7B|NRP1|WWTR1|DLL1|KIF26B|STRA6|FRAS1	-3.81704	0	2	0	0	-7.67617	8.32548
1	-7.33636	GO:0001655	M1	1	0	GO Biological Processes	19	urogenital system development	-7.33636	4.82928	7.48615	24155	331	272	18	6.61765	1.5073	59|185|1636|2028|2246|2736|3037|5629|6469|6659|7477|8829|25937|28514|55083|55840|64220|80144	ACTA2|AGTR1|ACE|ENPEP|FGF1|GLI2|HAS2|PROX1|SHH|SOX4|WNT7B|NRP1|WWTR1|DLL1|KIF26B|EAF2|STRA6|FRAS1	-3.81704	0	2	0	0	-7.67617	8.32548
1	-7.21601	GO:0060541	M1	1	0	GO Biological Processes	19	respiratory system development	-7.21601	6.27915	7.96004	24155	198	272	14	5.14706	1.33974	1490|1749|2246|2736|4323|5629|6469|7477|9242|23657|64220|64399|93986|340419	CCN2|DLX5|FGF1|GLI2|MMP14|PROX1|SHH|WNT7B|MSC|SLC7A11|STRA6|HHIP|FOXP2|RSPO2	-3.79359	0	3	1	1	-7.21601	38.0593
1	-6.20422	GO:0030324	M1	1	0	GO Biological Processes	19	lung development	-6.20422	6.19571	7.2978	24155	172	272	12	4.41176	1.24516	1490|2246|2736|4323|5629|6469|7477|23657|64220|64399|93986|340419	CCN2|FGF1|GLI2|MMP14|PROX1|SHH|WNT7B|SLC7A11|STRA6|HHIP|FOXP2|RSPO2	-2.84874	0	3	0	0	-7.21601	38.0593
1	-6.09772	GO:0030323	M1	1	0	GO Biological Processes	19	respiratory tube development	-6.09772	6.0549	7.1827	24155	176	272	12	4.41176	1.24516	1490|2246|2736|4323|5629|6469|7477|23657|64220|64399|93986|340419	CCN2|FGF1|GLI2|MMP14|PROX1|SHH|WNT7B|SLC7A11|STRA6|HHIP|FOXP2|RSPO2	-2.80024	0	3	0	0	-7.21601	38.0593
1	-5.70577	GO:0001568	M1	1	0	GO Biological Processes	19	blood vessel development	-5.70577	2.91355	5.72809	24155	762	272	25	9.19118	1.75172	59|133|185|577|1295|1490|1909|2028|2246|3037|3696|4313|4323|4804|5629|6469|6659|7477|8829|8862|11174|27286|28514|64220|221981	ACTA2|ADM|AGTR1|ADGRB3|COL8A1|CCN2|EDNRA|ENPEP|FGF1|HAS2|ITGB8|MMP2|MMP14|NGFR|PROX1|SHH|SOX4|WNT7B|NRP1|APLN|ADAMTS6|SRPX2|DLL1|STRA6|THSD7A	-2.45944	0	4	1	1	-5.70577	8.88051
1	-5.48507	GO:0048514	M1	1	0	GO Biological Processes	19	blood vessel morphogenesis	-5.48507	2.99489	5.63978	24155	682	272	23	8.45588	1.68698	133|185|577|1295|1490|1909|2028|2246|3037|3696|4313|4323|4804|5629|6469|6659|7477|8829|8862|27286|28514|64220|221981	ADM|AGTR1|ADGRB3|COL8A1|CCN2|EDNRA|ENPEP|FGF1|HAS2|ITGB8|MMP2|MMP14|NGFR|PROX1|SHH|SOX4|WNT7B|NRP1|APLN|SRPX2|DLL1|STRA6|THSD7A	-2.28449	0	4	0	0	-5.70577	8.88051
1	-5.40112	GO:0001944	M1	1	0	GO Biological Processes	19	vasculature development	-5.40112	2.79966	5.49928	24155	793	272	25	9.19118	1.75172	59|133|185|577|1295|1490|1909|2028|2246|3037|3696|4313|4323|4804|5629|6469|6659|7477|8829|8862|11174|27286|28514|64220|221981	ACTA2|ADM|AGTR1|ADGRB3|COL8A1|CCN2|EDNRA|ENPEP|FGF1|HAS2|ITGB8|MMP2|MMP14|NGFR|PROX1|SHH|SOX4|WNT7B|NRP1|APLN|ADAMTS6|SRPX2|DLL1|STRA6|THSD7A	-2.24194	0	4	0	0	-5.70577	8.88051
1	-5.12856	GO:0001501	M1	1	0	GO Biological Processes	19	skeletal system development	-5.12856	3.25733	5.54241	24155	518	272	19	6.98529	1.54555	1490|1749|2736|3037|3623|3696|4313|4323|6469|6659|6660|7092|7298|7477|8313|60484|64399|144347|340419	CCN2|DLX5|GLI2|HAS2|INHA|ITGB8|MMP2|MMP14|SHH|SOX4|SOX5|TLL1|TYMS|WNT7B|AXIN2|HAPLN2|HHIP|RFLNA|RSPO2	-2.00716	0	5	1	1	-5.12856	8.53896
1	-5.03726	GO:0048608	M1	1	0	GO Biological Processes	19	reproductive structure development	-5.03726	3.49465	5.58343	24155	432	272	17	6.25	1.46771	116|133|638|2736|3293|3383|3623|3696|4323|5270|6469|6932|7477|8728|55840|56956|64220	ADCYAP1|ADM|BIK|GLI2|HSD17B3|ICAM1|INHA|ITGB8|MMP14|SERPINE2|SHH|TCF7|WNT7B|ADAM19|EAF2|LHX9|STRA6	-1.98731	0	6	1	1	-5.03726	6.45856
1	-5.01602	GO:0003006	M1	1	0	GO Biological Processes	19	developmental process involved in reproduction	-5.01602	2.88584	5.31133	24155	677	272	22	8.08824	1.65321	116|133|638|2736|3293|3383|3623|3696|4323|4867|5270|6469|6932|7477|8728|9319|55840|56956|64220|80217|84225|117155	ADCYAP1|ADM|BIK|GLI2|HSD17B3|ICAM1|INHA|ITGB8|MMP14|NPHP1|SERPINE2|SHH|TCF7|WNT7B|ADAM19|TRIP13|EAF2|LHX9|STRA6|CFAP43|ZMYND15|CATSPER2	-1.98731	0	6	0	0	-5.03726	6.45856
1	-4.99826	GO:0061458	M1	1	0	GO Biological Processes	19	reproductive system development	-4.99826	3.47055	5.549	24155	435	272	17	6.25	1.46771	116|133|638|2736|3293|3383|3623|3696|4323|5270|6469|6932|7477|8728|55840|56956|64220	ADCYAP1|ADM|BIK|GLI2|HSD17B3|ICAM1|INHA|ITGB8|MMP14|SERPINE2|SHH|TCF7|WNT7B|ADAM19|EAF2|LHX9|STRA6	-1.98731	0	6	0	0	-5.03726	6.45856
1	-4.98377	GO:0032488	M1	1	0	GO Biological Processes	19	Cdc42 protein signal transduction	-4.98377	27.3247	10.1317	24155	13	272	4	1.47059	0.729868	19|7454|8829|58480	ABCA1|WAS|NRP1|RHOU	-1.98731	0	7	1	1	-4.98377	27.3247
1	-4.91162	GO:0048598	M1	1	0	GO Biological Processes	19	embryonic morphogenesis	-4.91162	3.03089	5.31129	24155	586	272	20	7.35294	1.58257	133|1295|1749|2736|3909|4313|4323|4771|5100|5629|6469|6657|6659|6932|7477|8862|28514|64220|80144|340419	ADM|COL8A1|DLX5|GLI2|LAMA3|MMP2|MMP14|NF2|PCDH8|PROX1|SHH|SOX2|SOX4|TCF7|WNT7B|APLN|DLL1|STRA6|FRAS1|RSPO2	-1.94149	0	3	0	0	-7.21601	38.0593
1	-4.85191	GO:0030574	M1	1	0	GO Biological Processes	19	collagen catabolic process	-4.85191	11.3368	7.5699	24155	47	272	6	2.20588	0.89056	4312|4313|4319|4320|4323|140766	MMP1|MMP2|MMP10|MMP11|MMP14|ADAMTS14	-1.93009	0	1	0	0	-7.74401	11.3368
1	-4.85917	GO:0030155	M1	1	0	GO Biological Processes	19	regulation of cell adhesion	-4.85917	2.81921	5.18563	24155	693	272	22	8.08824	1.65321	566|972|1295|2042|2615|2736|3037|3383|3592|3909|4323|4771|5100|5270|5274|5592|6469|6657|8728|8829|28514|55083	AZU1|CD74|COL8A1|EPHA3|LRRC32|GLI2|HAS2|ICAM1|IL12A|LAMA3|MMP14|NF2|PCDH8|SERPINE2|SERPINI1|PRKG1|SHH|SOX2|ADAM19|NRP1|DLL1|KIF26B	-1.93009	0	8	1	1	-4.85917	4.72368
1	-4.77963	GO:0000083	M1	1	0	GO Biological Processes	19	regulation of transcription involved in G1/S transition of mitotic cell cycle	-4.77963	15.3112	8.2294	24155	29	272	5	1.83824	0.814493	990|4998|6241|7298|8318	CDC6|ORC1|RRM2|TYMS|CDC45	-1.88008	0	9	1	1	-4.77963	26.6415
1	-4.71506	GO:0045664	M1	1	0	GO Biological Processes	19	regulation of neuron differentiation	-4.71506	2.84285	5.10683	24155	656	272	21	7.72059	1.61843	116|577|2042|2736|4804|5274|5629|6469|6657|7025|7869|8829|11141|22999|28514|57520|80258|114788|146760|223117|374946	ADCYAP1|ADGRB3|EPHA3|GLI2|NGFR|SERPINI1|PROX1|SHH|SOX2|NR2F1|SEMA3B|NRP1|IL1RAPL1|RIMS1|DLL1|HECW2|EFHC2|CSMD3|RTN4RL1|SEMA3D|DRAXIN	-1.8403	0	10	1	1	-4.71506	10.2467
1	-4.69845	GO:0090066	M1	1	0	GO Biological Processes	19	regulation of anatomical structure size	-4.69845	3.15285	5.22822	24155	507	272	18	6.61765	1.5073	59|116|133|185|1636|1909|3383|4703|5592|7454|7477|7869|8829|8862|25802|64798|223117|374946	ACTA2|ADCYAP1|ADM|AGTR1|ACE|EDNRA|ICAM1|NEB|PRKG1|WAS|WNT7B|SEMA3B|NRP1|APLN|LMOD1|DEPTOR|SEMA3D|DRAXIN	-1.8403	0	10	0	0	-4.71506	10.2467
1	-4.62071	GO:0042310	M1	1	0	GO Biological Processes	19	vasoconstriction	-4.62071	8.17942	6.68978	24155	76	272	7	2.57353	0.960105	59|133|185|1636|1909|3383|8862	ACTA2|ADM|AGTR1|ACE|EDNRA|ICAM1|APLN	-1.78187	0	11	1	1	-4.62071	8.17942
1	-4.58958	GO:0000076	M1	1	0	GO Biological Processes	19	DNA replication checkpoint	-4.58958	22.2013	9.0531	24155	16	272	4	1.47059	0.729868	990|4998|8318|63967	CDC6|ORC1|CDC45|CLSPN	-1.77419	0	9	0	0	-4.77963	26.6415
1	-4.57682	GO:0060322	M1	1	0	GO Biological Processes	19	head development	-4.57682	2.62872	4.9248	24155	777	272	23	8.45588	1.68698	116|1749|1909|2736|3777|4313|4323|4771|5270|5592|5629|6469|6657|7477|8829|11240|23657|28514|64220|93986|146760|158067|374946	ADCYAP1|DLX5|EDNRA|GLI2|KCNK3|MMP2|MMP14|NF2|SERPINE2|PRKG1|PROX1|SHH|SOX2|WNT7B|NRP1|PADI2|SLC7A11|DLL1|STRA6|FOXP2|RTN4RL1|AK8|DRAXIN	-1.77419	0	12	1	1	-4.57682	11.4587
1	-4.54945	GO:0003018	M1	1	0	GO Biological Processes	19	vascular process in circulatory system	-4.54945	5.13325	5.82245	24155	173	272	10	3.67647	1.14103	59|116|133|185|566|1636|1909|3383|5592|8862	ACTA2|ADCYAP1|ADM|AGTR1|AZU1|ACE|EDNRA|ICAM1|PRKG1|APLN	-1.76385	0	11	0	0	-4.62071	8.17942
1	-4.4373	GO:0035296	M1	1	0	GO Biological Processes	19	regulation of tube diameter	-4.4373	5.58914	5.8738	24155	143	272	9	3.30882	1.08454	59|116|133|185|1636|1909|3383|5592|8862	ACTA2|ADCYAP1|ADM|AGTR1|ACE|EDNRA|ICAM1|PRKG1|APLN	-1.69912	0	11	0	0	-4.62071	8.17942
1	-4.4373	GO:0050880	M1	1	0	GO Biological Processes	19	regulation of blood vessel size	-4.4373	5.58914	5.8738	24155	143	272	9	3.30882	1.08454	59|116|133|185|1636|1909|3383|5592|8862	ACTA2|ADCYAP1|ADM|AGTR1|ACE|EDNRA|ICAM1|PRKG1|APLN	-1.69912	0	11	0	0	-4.62071	8.17942
1	-4.4373	GO:0097746	M1	1	0	GO Biological Processes	19	regulation of blood vessel diameter	-4.4373	5.58914	5.8738	24155	143	272	9	3.30882	1.08454	59|116|133|185|1636|1909|3383|5592|8862	ACTA2|ADCYAP1|ADM|AGTR1|ACE|EDNRA|ICAM1|PRKG1|APLN	-1.69912	0	11	0	0	-4.62071	8.17942
1	-4.41351	GO:0035150	M1	1	0	GO Biological Processes	19	regulation of tube size	-4.41351	5.55032	5.84457	24155	144	272	9	3.30882	1.08454	59|116|133|185|1636|1909|3383|5592|8862	ACTA2|ADCYAP1|ADM|AGTR1|ACE|EDNRA|ICAM1|PRKG1|APLN	-1.69005	0	11	0	0	-4.62071	8.17942
1	-4.36178	GO:0061138	M1	1	0	GO Biological Processes	19	morphogenesis of a branching epithelium	-4.36178	4.8794	5.60627	24155	182	272	10	3.67647	1.14103	133|1909|2246|2736|4323|5629|6469|8829|64399|340419	ADM|EDNRA|FGF1|GLI2|MMP14|PROX1|SHH|NRP1|HHIP|RSPO2	-1.65257	0	3	0	0	-7.21601	38.0593
1	-4.32056	GO:0007442	M1	1	0	GO Biological Processes	19	hindgut morphogenesis	-4.32056	38.0593	10.465	24155	7	272	3	1.10294	0.633262	2736|6469|6932	GLI2|SHH|TCF7	-1.65146	0	3	0	0	-7.21601	38.0593
1	-4.33758	GO:0097756	M1	1	0	GO Biological Processes	19	negative regulation of blood vessel diameter	-4.33758	7.40043	6.27099	24155	84	272	7	2.57353	0.960105	59|133|185|1636|1909|3383|8862	ACTA2|ADM|AGTR1|ACE|EDNRA|ICAM1|APLN	-1.65146	0	11	0	0	-4.62071	8.17942
1	-4.32056	GO:0060839	M1	1	0	GO Biological Processes	19	endothelial cell fate commitment	-4.32056	38.0593	10.465	24155	7	272	3	1.10294	0.633262	5629|8829|28514	PROX1|NRP1|DLL1	-1.65146	0	13	1	1	-4.32056	38.0593
1	-4.17977	GO:0048745	M1	1	0	GO Biological Processes	19	smooth muscle tissue development	-4.17977	17.761	8.00252	24155	20	272	4	1.47059	0.729868	5629|6469|64220|93986	PROX1|SHH|STRA6|FOXP2	-1.52327	0	14	1	1	-4.17977	17.761
1	-4.12007	GO:0061525	M1	1	0	GO Biological Processes	19	hindgut development	-4.12007	33.3019	9.75161	24155	8	272	3	1.10294	0.633262	2736|6469|6932	GLI2|SHH|TCF7	-1.4877	0	3	0	0	-7.21601	38.0593
1	-4.12286	GO:0030036	M1	1	0	GO Biological Processes	19	actin cytoskeleton organization	-4.12286	2.66282	4.64751	24155	667	272	20	7.35294	1.58257	1490|2042|3383|4629|4703|4771|4867|5592|5629|7454|8829|11346|25802|58480|84665|129446|144347|201191|221981|339768	CCN2|EPHA3|ICAM1|MYH11|NEB|NF2|NPHP1|PRKG1|PROX1|WAS|NRP1|SYNPO|LMOD1|RHOU|MYPN|XIRP2|RFLNA|SAMD14|THSD7A|ESPNL	-1.4877	0	15	1	1	-4.12286	5.82329
1	-4.09273	GO:0060562	M1	1	0	GO Biological Processes	19	epithelial tube morphogenesis	-4.09273	3.5853	4.98407	24155	322	272	13	4.77941	1.29351	133|1909|2246|2736|4323|5629|6469|6659|8829|28514|55083|64399|340419	ADM|EDNRA|FGF1|GLI2|MMP14|PROX1|SHH|SOX4|NRP1|DLL1|KIF26B|HHIP|RSPO2	-1.48214	0	3	0	0	-7.21601	38.0593
1	-4.09165	GO:0001763	M1	1	0	GO Biological Processes	19	morphogenesis of a branching structure	-4.09165	4.53087	5.29676	24155	196	272	10	3.67647	1.14103	133|1909|2246|2736|4323|5629|6469|8829|64399|340419	ADM|EDNRA|FGF1|GLI2|MMP14|PROX1|SHH|NRP1|HHIP|RSPO2	-1.48214	0	3	0	0	-7.21601	38.0593
1	-4.06139	GO:0048729	M1	1	0	GO Biological Processes	19	tissue morphogenesis	-4.06139	2.63517	4.59482	24155	674	272	20	7.35294	1.58257	59|133|1909|2246|2736|3909|4323|4771|5100|5629|6469|6659|7477|8829|28514|55083|64399|80144|129446|340419	ACTA2|ADM|EDNRA|FGF1|GLI2|LAMA3|MMP14|NF2|PCDH8|PROX1|SHH|SOX4|WNT7B|NRP1|DLL1|KIF26B|HHIP|FRAS1|XIRP2|RSPO2	-1.46287	0	3	0	0	-7.21601	38.0593
1	-3.99585	GO:0060993	M1	1	0	GO Biological Processes	19	kidney morphogenesis	-3.99585	6.54354	5.77744	24155	95	272	7	2.57353	0.960105	2246|6469|6659|7477|25937|55083|80144	FGF1|SHH|SOX4|WNT7B|WWTR1|KIF26B|FRAS1	-1.40806	0	2	0	0	-7.67617	8.32548
1	-3.91845	GO:0030900	M1	1	0	GO Biological Processes	19	forebrain development	-3.91845	3.25464	4.74025	24155	382	272	14	5.14706	1.33974	116|1749|2736|4771|5592|5629|6469|6657|7477|8829|23657|93986|146760|374946	ADCYAP1|DLX5|GLI2|NF2|PRKG1|PROX1|SHH|SOX2|WNT7B|NRP1|SLC7A11|FOXP2|RTN4RL1|DRAXIN	-1.346	0	12	0	0	-4.57682	11.4587
1	-3.91311	GO:0050679	M1	1	0	GO Biological Processes	19	positive regulation of epithelial cell proliferation	-3.91311	4.31093	5.09301	24155	206	272	10	3.67647	1.14103	185|1749|2246|3037|5629|6469|8829|8862|11223|93986	AGTR1|DLX5|FGF1|HAS2|PROX1|SHH|NRP1|APLN|MST1L|FOXP2	-1.346	0	12	0	0	-4.57682	11.4587
1	-3.87406	GO:0001525	M1	1	0	GO Biological Processes	19	angiogenesis	-3.87406	2.71852	4.50222	24155	588	272	18	6.61765	1.5073	133|185|577|1295|1490|1909|2028|2246|3696|4313|4323|4804|6469|8829|8862|27286|28514|221981	ADM|AGTR1|ADGRB3|COL8A1|CCN2|EDNRA|ENPEP|FGF1|ITGB8|MMP2|MMP14|NGFR|SHH|NRP1|APLN|SRPX2|DLL1|THSD7A	-1.32921	0	4	0	0	-5.70577	8.88051
1	-3.86702	GO:0048732	M1	1	0	GO Biological Processes	19	gland development	-3.86702	3.06225	4.63193	24155	435	272	15	5.51471	1.38407	116|440|2736|5270|5629|6469|6657|7298|7477|8829|8862|11223|29842|55840|64220	ADCYAP1|ASNS|GLI2|SERPINE2|PROX1|SHH|SOX2|TYMS|WNT7B|NRP1|APLN|MST1L|TFCP2L1|EAF2|STRA6	-1.32921	0	12	0	0	-4.57682	11.4587
1	-3.87406	GO:0007507	M1	1	0	GO Biological Processes	19	heart development	-3.87406	2.71852	4.50222	24155	588	272	18	6.61765	1.5073	133|1363|1909|2736|3037|4629|4703|5629|6469|6659|7133|8313|8829|8862|11174|28514|64220|129446	ADM|CPE|EDNRA|GLI2|HAS2|MYH11|NEB|PROX1|SHH|SOX4|TNFRSF1B|AXIN2|NRP1|APLN|ADAMTS6|DLL1|STRA6|XIRP2	-1.32921	0	16	1	1	-3.87406	5.32831
1	-3.83165	GO:0002009	M1	1	0	GO Biological Processes	19	morphogenesis of an epithelium	-3.83165	2.79572	4.50376	24155	540	272	17	6.25	1.46771	133|1909|2246|2736|3909|4323|5100|5629|6469|6659|7477|8829|28514|55083|64399|80144|340419	ADM|EDNRA|FGF1|GLI2|LAMA3|MMP14|PCDH8|PROX1|SHH|SOX4|WNT7B|NRP1|DLL1|KIF26B|HHIP|FRAS1|RSPO2	-1.31179	0	3	0	0	-7.21601	38.0593
1	-3.83113	GO:0035987	M1	1	0	GO Biological Processes	19	endodermal cell differentiation	-3.83113	9.86724	6.35376	24155	45	272	5	1.83824	0.814493	1295|3909|4313|4323|6657	COL8A1|LAMA3|MMP2|MMP14|SOX2	-1.31179	0	17	1	1	-3.83113	9.86724
1	-3.82213	GO:0044089	M1	1	0	GO Biological Processes	19	positive regulation of cellular component biogenesis	-3.82213	2.79055	4.49505	24155	541	272	17	6.25	1.46771	19|577|638|1490|3383|3556|4312|4771|4867|5629|7454|8829|11141|11346|25802|27286|90427	ABCA1|ADGRB3|BIK|CCN2|ICAM1|IL1RAP|MMP1|NF2|NPHP1|PROX1|WAS|NRP1|IL1RAPL1|SYNPO|LMOD1|SRPX2|BMF	-1.31175	0	15	0	0	-4.12286	5.82329
1	-3.80727	GO:0030029	M1	1	0	GO Biological Processes	19	actin filament-based process	-3.80727	2.45383	4.34603	24155	760	272	21	7.72059	1.61843	1490|2042|3383|4629|4703|4771|4867|5592|5629|7454|8829|8913|11346|25802|58480|84665|129446|144347|201191|221981|339768	CCN2|EPHA3|ICAM1|MYH11|NEB|NF2|NPHP1|PRKG1|PROX1|WAS|NRP1|CACNA1G|SYNPO|LMOD1|RHOU|MYPN|XIRP2|RFLNA|SAMD14|THSD7A|ESPNL	-1.30567	0	15	0	0	-4.12286	5.82329
1	-3.79634	GO:0033314	M1	1	0	GO Biological Processes	19	mitotic DNA replication checkpoint	-3.79634	26.6415	8.65496	24155	10	272	3	1.10294	0.633262	990|4998|63967	CDC6|ORC1|CLSPN	-1.30334	0	9	0	0	-4.77963	26.6415
1	-3.74935	GO:0050673	M1	1	0	GO Biological Processes	19	epithelial cell proliferation	-3.74935	2.98672	4.51941	24155	446	272	15	5.51471	1.38407	185|1295|1749|2246|3037|4323|4804|5629|6469|6657|8829|8862|11223|55840|93986	AGTR1|COL8A1|DLX5|FGF1|HAS2|MMP14|NGFR|PROX1|SHH|SOX2|NRP1|APLN|MST1L|EAF2|FOXP2	-1.26477	0	12	0	0	-4.57682	11.4587
1	-3.72715	GO:0010975	M1	1	0	GO Biological Processes	19	regulation of neuron projection development	-3.72715	2.84746	4.4503	24155	499	272	16	5.88235	1.42668	116|577|2042|4804|5274|7025|7869|8829|11141|22999|57520|80258|114788|146760|223117|374946	ADCYAP1|ADGRB3|EPHA3|NGFR|SERPINI1|NR2F1|SEMA3B|NRP1|IL1RAPL1|RIMS1|HECW2|EFHC2|CSMD3|RTN4RL1|SEMA3D|DRAXIN	-1.25084	0	10	0	0	-4.71506	10.2467
1	-3.69647	GO:0008038	M1	1	0	GO Biological Processes	19	neuron recognition	-3.69647	9.25054	6.10613	24155	48	272	5	1.83824	0.814493	2042|8829|50863|84665|128434	EPHA3|NRP1|NTM|MYPN|VSTM2L	-1.22829	0	18	1	1	-3.69647	9.25054
1	-3.6504	GO:0072006	M1	1	0	GO Biological Processes	19	nephron development	-3.6504	4.96812	5.07894	24155	143	272	8	2.94118	1.02446	59|2028|2246|6469|7477|25937|28514|55083	ACTA2|ENPEP|FGF1|SHH|WNT7B|WWTR1|DLL1|KIF26B	-1.2057	0	2	0	0	-7.67617	8.32548
1	-3.66167	GO:0060439	M1	1	0	GO Biological Processes	19	trachea morphogenesis	-3.66167	24.2196	8.22017	24155	11	272	3	1.10294	0.633262	6469|7477|340419	SHH|WNT7B|RSPO2	-1.2057	0	3	0	0	-7.21601	38.0593
1	-3.65634	GO:0022407	M1	1	0	GO Biological Processes	19	regulation of cell-cell adhesion	-3.65634	3.06981	4.48291	24155	405	272	14	5.14706	1.33974	972|2615|2736|3037|3383|3592|4771|5100|5270|5592|6469|6657|8728|55083	CD74|LRRC32|GLI2|HAS2|ICAM1|IL12A|NF2|PCDH8|SERPINE2|PRKG1|SHH|SOX2|ADAM19|KIF26B	-1.2057	0	8	0	0	-4.85917	4.72368
1	-3.60223	GO:0048589	M1	1	0	GO Biological Processes	19	developmental growth	-3.60223	2.50341	4.22458	24155	674	272	19	6.98529	1.54555	133|2246|2736|5629|6469|6657|7298|7477|7516|7869|8829|22999|25937|28514|55083|64220|223117|340419|374946	ADM|FGF1|GLI2|PROX1|SHH|SOX2|TYMS|WNT7B|XRCC2|SEMA3B|NRP1|RIMS1|WWTR1|DLL1|KIF26B|STRA6|SEMA3D|RSPO2|DRAXIN	-1.19405	0	2	0	0	-7.67617	8.32548
1	-3.61192	GO:0060425	M1	1	0	GO Biological Processes	19	lung morphogenesis	-3.61192	8.88051	5.95279	24155	50	272	5	1.83824	0.814493	6469|7477|64399|93986|340419	SHH|WNT7B|HHIP|FOXP2|RSPO2	-1.19405	0	3	0	0	-7.21601	38.0593
1	-3.60249	GO:0045665	M1	1	0	GO Biological Processes	19	negative regulation of neuron differentiation	-3.60249	3.9469	4.73935	24155	225	272	10	3.67647	1.14103	4804|6469|6657|7025|7869|8829|28514|146760|223117|374946	NGFR|SHH|SOX2|NR2F1|SEMA3B|NRP1|DLL1|RTN4RL1|SEMA3D|DRAXIN	-1.19405	0	10	0	0	-4.71506	10.2467
1	-3.60223	GO:0097435	M1	1	0	GO Biological Processes	19	supramolecular fiber organization	-3.60223	2.50341	4.22458	24155	674	272	19	6.98529	1.54555	1490|3383|4320|4629|4703|4771|5629|6469|7454|8829|11346|25802|58480|83473|84665|140766|144347|201191|339768	CCN2|ICAM1|MMP11|MYH11|NEB|NF2|PROX1|SHH|WAS|NRP1|SYNPO|LMOD1|RHOU|KATNAL2|MYPN|ADAMTS14|RFLNA|SAMD14|ESPNL	-1.19405	0	15	0	0	-4.12286	5.82329
1	-3.61192	GO:0001706	M1	1	0	GO Biological Processes	19	endoderm formation	-3.61192	8.88051	5.95279	24155	50	272	5	1.83824	0.814493	1295|3909|4313|4323|6657	COL8A1|LAMA3|MMP2|MMP14|SOX2	-1.19405	0	17	0	0	-3.83113	9.86724
1	-3.53957	GO:0033045	M1	1	0	GO Biological Processes	19	regulation of sister chromatid segregation	-3.53957	6.66039	5.41181	24155	80	272	6	2.20588	0.89056	990|8313|9212|9319|57520|113130	CDC6|AXIN2|AURKB|TRIP13|HECW2|CDCA5	-1.13834	0	19	1	1	-3.53957	6.96511
1	-3.53116	GO:0032330	M1	1	0	GO Biological Processes	19	regulation of chondrocyte differentiation	-3.53116	8.53896	5.8078	24155	52	272	5	1.83824	0.814493	1490|2736|6660|8313|144347	CCN2|GLI2|SOX5|AXIN2|RFLNA	-1.13676	0	5	0	0	-5.12856	8.53896
1	-3.50952	GO:0048754	M1	1	0	GO Biological Processes	19	branching morphogenesis of an epithelial tube	-3.50952	4.73627	4.89856	24155	150	272	8	2.94118	1.02446	1909|2246|2736|4323|6469|8829|64399|340419	EDNRA|FGF1|GLI2|MMP14|SHH|NRP1|HHIP|RSPO2	-1.12186	0	3	0	0	-7.21601	38.0593
1	-3.48128	GO:0022617	M1	1	0	GO Biological Processes	19	extracellular matrix disassembly	-3.48128	6.49794	5.32202	24155	82	272	6	2.20588	0.89056	4312|4313|4319|4320|4323|7092	MMP1|MMP2|MMP10|MMP11|MMP14|TLL1	-1.1186	0	1	0	0	-7.74401	11.3368
1	-3.48033	GO:0032963	M1	1	0	GO Biological Processes	19	collagen metabolic process	-3.48033	5.40553	5.05376	24155	115	272	7	2.57353	0.960105	1490|4312|4313|4319|4320|4323|140766	CCN2|MMP1|MMP2|MMP10|MMP11|MMP14|ADAMTS14	-1.1186	0	1	0	0	-7.74401	11.3368
1	-3.49937	GO:0007411	M1	1	0	GO Biological Processes	19	axon guidance	-3.49937	3.53934	4.52794	24155	276	272	11	4.04412	1.19444	1749|2042|2736|6469|7869|8829|56956|84665|128434|223117|374946	DLX5|EPHA3|GLI2|SHH|SEMA3B|NRP1|LHX9|MYPN|VSTM2L|SEMA3D|DRAXIN	-1.1186	0	10	0	0	-4.71506	10.2467
1	-3.48604	GO:0097485	M1	1	0	GO Biological Processes	19	neuron projection guidance	-3.48604	3.52656	4.51341	24155	277	272	11	4.04412	1.19444	1749|2042|2736|6469|7869|8829|56956|84665|128434|223117|374946	DLX5|EPHA3|GLI2|SHH|SEMA3B|NRP1|LHX9|MYPN|VSTM2L|SEMA3D|DRAXIN	-1.1186	0	10	0	0	-4.71506	10.2467
1	-3.46569	GO:0021696	M1	1	0	GO Biological Processes	19	cerebellar cortex morphogenesis	-3.46569	11.8407	6.34042	24155	30	272	4	1.47059	0.729868	2736|5270|5629|28514	GLI2|SERPINE2|PROX1|DLL1	-1.11637	0	13	0	0	-4.32056	38.0593
1	-3.46569	GO:0043171	M1	1	0	GO Biological Processes	19	peptide catabolic process	-3.46569	11.8407	6.34042	24155	30	272	4	1.47059	0.729868	1636|2028|79094|206338	ACE|ENPEP|CHAC1|LVRN	-1.11637	0	20	1	1	-3.46569	11.8407
1	-3.40953	GO:0070306	M1	1	0	GO Biological Processes	19	lens fiber cell differentiation	-3.40953	11.4587	6.21827	24155	31	272	4	1.47059	0.729868	4771|5629|7477|23657	NF2|PROX1|WNT7B|SLC7A11	-1.06628	0	12	0	0	-4.57682	11.4587
1	-3.40078	GO:0045596	M1	1	0	GO Biological Processes	19	negative regulation of cell differentiation	-3.40078	2.34624	4.0162	24155	757	272	20	7.35294	1.58257	19|116|972|2736|3623|4320|4804|6469|6657|7025|7869|8313|8829|10221|25937|28514|144347|146760|223117|374946	ABCA1|ADCYAP1|CD74|GLI2|INHA|MMP11|NGFR|SHH|SOX2|NR2F1|SEMA3B|AXIN2|NRP1|TRIB1|WWTR1|DLL1|RFLNA|RTN4RL1|SEMA3D|DRAXIN	-1.06353	0	10	0	0	-4.71506	10.2467
1	-3.38856	GO:0006935	M1	1	0	GO Biological Processes	19	chemotaxis	-3.38856	2.47828	4.06112	24155	645	272	18	6.61765	1.5073	185|566|972|1749|2042|2246|2736|3592|6469|7869|8829|11223|11240|56956|84665|128434|223117|374946	AGTR1|AZU1|CD74|DLX5|EPHA3|FGF1|GLI2|IL12A|SHH|SEMA3B|NRP1|MST1L|PADI2|LHX9|MYPN|VSTM2L|SEMA3D|DRAXIN	-1.05722	0	10	0	0	-4.71506	10.2467
1	-3.37273	GO:0042330	M1	1	0	GO Biological Processes	19	taxis	-3.37273	2.47062	4.0465	24155	647	272	18	6.61765	1.5073	185|566|972|1749|2042|2246|2736|3592|6469|7869|8829|11223|11240|56956|84665|128434|223117|374946	AGTR1|AZU1|CD74|DLX5|EPHA3|FGF1|GLI2|IL12A|SHH|SEMA3B|NRP1|MST1L|PADI2|LHX9|MYPN|VSTM2L|SEMA3D|DRAXIN	-1.04722	0	10	0	0	-4.71506	10.2467
1	-3.33459	GO:0031032	M1	1	0	GO Biological Processes	19	actomyosin structure organization	-3.33459	3.99623	4.54074	24155	200	272	9	3.30882	1.08454	1490|4629|4703|4771|5629|7454|8829|25802|84665	CCN2|MYH11|NEB|NF2|PROX1|WAS|NRP1|LMOD1|MYPN	-1.02051	0	15	0	0	-4.12286	5.82329
1	-3.33946	GO:0051962	M1	1	0	GO Biological Processes	19	positive regulation of nervous system development	-3.33946	2.6264	4.08297	24155	541	272	16	5.88235	1.42668	116|577|2042|2736|3556|4804|5270|5274|5629|6469|7133|7516|8829|11141|22999|27286	ADCYAP1|ADGRB3|EPHA3|GLI2|IL1RAP|NGFR|SERPINE2|SERPINI1|PROX1|SHH|TNFRSF1B|XRCC2|NRP1|IL1RAPL1|RIMS1|SRPX2	-1.02051	0	21	1	1	-3.33946	2.6264
1	-3.31846	GO:0042063	M1	1	0	GO Biological Processes	19	gliogenesis	-3.31846	3.36847	4.33033	24155	290	272	11	4.04412	1.19444	116|566|4323|4771|5270|6469|6657|6659|7133|28514|54587	ADCYAP1|AZU1|MMP14|NF2|SERPINE2|SHH|SOX2|SOX4|TNFRSF1B|DLL1|MXRA8	-1.00997	0	22	1	1	-3.31846	3.36847
1	-3.30872	GO:0019229	M1	1	0	GO Biological Processes	19	regulation of vasoconstriction	-3.30872	7.65562	5.41571	24155	58	272	5	1.83824	0.814493	133|185|1636|3383|8862	ADM|AGTR1|ACE|ICAM1|APLN	-1.00852	0	11	0	0	-4.62071	8.17942
1	-3.30601	GO:0050678	M1	1	0	GO Biological Processes	19	regulation of epithelial cell proliferation	-3.30601	2.97543	4.18625	24155	388	272	13	4.77941	1.29351	185|1749|2246|3037|4804|5629|6469|6657|8829|8862|11223|55840|93986	AGTR1|DLX5|FGF1|HAS2|NGFR|PROX1|SHH|SOX2|NRP1|APLN|MST1L|EAF2|FOXP2	-1.00852	0	12	0	0	-4.57682	11.4587
1	-3.25257	GO:0048566	M1	1	0	GO Biological Processes	19	embryonic digestive tract development	-3.25257	10.4477	5.88303	24155	34	272	4	1.47059	0.729868	2736|6469|6932|64220	GLI2|SHH|TCF7|STRA6	-0.971068	0	3	0	0	-7.21601	38.0593
1	-3.25669	GO:0050768	M1	1	0	GO Biological Processes	19	negative regulation of neurogenesis	-3.25669	3.31138	4.26267	24155	295	272	11	4.04412	1.19444	116|4804|6469|6657|7025|7869|8829|28514|146760|223117|374946	ADCYAP1|NGFR|SHH|SOX2|NR2F1|SEMA3B|NRP1|DLL1|RTN4RL1|SEMA3D|DRAXIN	-0.971068	0	10	0	0	-4.71506	10.2467
1	-3.25374	GO:0003013	M1	1	0	GO Biological Processes	19	circulatory system process	-3.25374	2.57873	4.00061	24155	551	272	16	5.88235	1.42668	59|116|133|185|566|1490|1636|1909|2028|3383|3777|5592|8862|8913|25937|28514	ACTA2|ADCYAP1|ADM|AGTR1|AZU1|CCN2|ACE|EDNRA|ENPEP|ICAM1|KCNK3|PRKG1|APLN|CACNA1G|WWTR1|DLL1	-0.971068	0	11	0	0	-4.62071	8.17942
1	-3.2457	GO:0010721	M1	1	0	GO Biological Processes	19	negative regulation of cell development	-3.2457	3.09785	4.18216	24155	344	272	12	4.41176	1.24516	116|4804|6469|6657|7025|7869|8829|28514|144347|146760|223117|374946	ADCYAP1|NGFR|SHH|SOX2|NR2F1|SEMA3B|NRP1|DLL1|RFLNA|RTN4RL1|SEMA3D|DRAXIN	-0.969563	0	10	0	0	-4.71506	10.2467
1	-3.23564	GO:0072148	M1	1	0	GO Biological Processes	19	epithelial cell fate commitment	-3.23564	17.761	6.92966	24155	15	272	3	1.10294	0.633262	5629|8829|28514	PROX1|NRP1|DLL1	-0.969563	0	13	0	0	-4.32056	38.0593
1	-3.23564	GO:0043584	M1	1	0	GO Biological Processes	19	nose development	-3.23564	17.761	6.92966	24155	15	272	3	1.10294	0.633262	1749|5629|64220	DLX5|PROX1|STRA6	-0.969563	0	23	1	1	-3.23564	17.761
1	-3.22033	GO:0035270	M1	1	0	GO Biological Processes	19	endocrine system development	-3.22033	4.89477	4.69634	24155	127	272	7	2.57353	0.960105	116|2736|6469|6657|6659|28514|64220	ADCYAP1|GLI2|SHH|SOX2|SOX4|DLL1|STRA6	-0.959273	0	3	0	0	-7.21601	38.0593
1	-3.19698	GO:0051216	M1	1	0	GO Biological Processes	19	cartilage development	-3.19698	3.82415	4.37601	24155	209	272	9	3.30882	1.08454	1490|2736|3696|6660|7298|7477|8313|144347|340419	CCN2|GLI2|ITGB8|SOX5|TYMS|WNT7B|AXIN2|RFLNA|RSPO2	-0.940887	0	5	0	0	-5.12856	8.53896
1	-3.18811	GO:0072080	M1	1	0	GO Biological Processes	19	nephron tubule development	-3.18811	5.72936	4.87655	24155	93	272	6	2.20588	0.89056	2246|6469|7477|25937|28514|55083	FGF1|SHH|WNT7B|WWTR1|DLL1|KIF26B	-0.936924	0	2	0	0	-7.67617	8.32548
1	-3.16297	GO:0007015	M1	1	0	GO Biological Processes	19	actin filament organization	-3.16297	2.87181	4.03878	24155	402	272	13	4.77941	1.29351	1490|3383|4703|4771|5629|7454|8829|11346|25802|58480|144347|201191|339768	CCN2|ICAM1|NEB|NF2|PROX1|WAS|NRP1|SYNPO|LMOD1|RHOU|RFLNA|SAMD14|ESPNL	-0.916633	0	15	0	0	-4.12286	5.82329
1	-3.15637	GO:0060428	M1	1	0	GO Biological Processes	19	lung epithelium development	-3.15637	9.86724	5.68191	24155	36	272	4	1.47059	0.729868	6469|7477|64220|93986	SHH|WNT7B|STRA6|FOXP2	-0.914835	0	14	0	0	-4.17977	17.761
1	-3.15055	GO:0007420	M1	1	0	GO Biological Processes	19	brain development	-3.15055	2.29877	3.8134	24155	734	272	19	6.98529	1.54555	116|1749|2736|3777|4771|5270|5592|5629|6469|6657|7477|8829|11240|23657|28514|93986|146760|158067|374946	ADCYAP1|DLX5|GLI2|KCNK3|NF2|SERPINE2|PRKG1|PROX1|SHH|SOX2|WNT7B|NRP1|PADI2|SLC7A11|DLL1|FOXP2|RTN4RL1|AK8|DRAXIN	-0.913756	0	12	0	0	-4.57682	11.4587
1	-3.13924	GO:0061326	M1	1	0	GO Biological Processes	19	renal tubule development	-3.13924	5.60875	4.80321	24155	95	272	6	2.20588	0.89056	2246|6469|7477|25937|28514|55083	FGF1|SHH|WNT7B|WWTR1|DLL1|KIF26B	-0.907148	0	2	0	0	-7.67617	8.32548
1	-3.11136	GO:1903672	M1	1	0	GO Biological Processes	19	positive regulation of sprouting angiogenesis	-3.11136	6.9379	5.0761	24155	64	272	5	1.83824	0.814493	185|2246|8829|27286|28514	AGTR1|FGF1|NRP1|SRPX2|DLL1	-0.892206	0	4	0	0	-5.70577	8.88051
1	-3.11051	GO:0006270	M1	1	0	GO Biological Processes	19	DNA replication initiation	-3.11051	9.60056	5.58716	24155	37	272	4	1.47059	0.729868	990|4998|8318|55388	CDC6|ORC1|CDC45|MCM10	-0.892206	0	9	0	0	-4.77963	26.6415
1	-3.11051	GO:0021587	M1	1	0	GO Biological Processes	19	cerebellum morphogenesis	-3.11051	9.60056	5.58716	24155	37	272	4	1.47059	0.729868	2736|5270|5629|28514	GLI2|SERPINE2|PROX1|DLL1	-0.892206	0	13	0	0	-4.32056	38.0593
1	-3.08098	GO:0050920	M1	1	0	GO Biological Processes	19	regulation of chemotaxis	-3.08098	3.68316	4.23709	24155	217	272	9	3.30882	1.08454	566|972|2246|3592|7869|8829|11223|11240|223117	AZU1|CD74|FGF1|IL12A|SEMA3B|NRP1|MST1L|PADI2|SEMA3D	-0.871633	0	10	0	0	-4.71506	10.2467
1	-3.08218	GO:0000724	M1	1	0	GO Biological Processes	19	double-strand break repair via homologous recombination	-3.08218	4.63907	4.50798	24155	134	272	7	2.57353	0.960105	2187|7454|7516|8318|9401|10635|51659	FANCB|WAS|XRCC2|CDC45|RECQL4|RAD51AP1|GINS2	-0.871633	0	24	1	1	-3.08218	4.63907
1	-3.06318	GO:0000725	M1	1	0	GO Biological Processes	19	recombinational repair	-3.06318	4.60471	4.48214	24155	135	272	7	2.57353	0.960105	2187|7454|7516|8318|9401|10635|51659	FANCB|WAS|XRCC2|CDC45|RECQL4|RAD51AP1|GINS2	-0.858234	0	24	0	0	-3.08218	4.63907
1	-3.05273	GO:0001654	M1	1	0	GO Biological Processes	19	eye development	-3.05273	2.94382	3.97667	24155	362	272	12	4.41176	1.24516	1295|4771|4867|5629|6469|6657|7477|8829|23657|28514|64220|93986	COL8A1|NF2|NPHP1|PROX1|SHH|SOX2|WNT7B|NRP1|SLC7A11|DLL1|STRA6|FOXP2	-0.852152	0	12	0	0	-4.57682	11.4587
1	-3.02507	GO:0048762	M1	1	0	GO Biological Processes	19	mesenchymal cell differentiation	-3.02507	3.6165	4.17007	24155	221	272	9	3.30882	1.08454	1909|2042|3037|6469|7869|8313|8829|25937|223117	EDNRA|EPHA3|HAS2|SHH|SEMA3B|AXIN2|NRP1|WWTR1|SEMA3D	-0.842891	0	10	0	0	-4.71506	10.2467
1	-3.02328	GO:0051961	M1	1	0	GO Biological Processes	19	negative regulation of nervous system development	-3.02328	3.10113	4.00581	24155	315	272	11	4.04412	1.19444	116|4804|6469|6657|7025|7869|8829|28514|146760|223117|374946	ADCYAP1|NGFR|SHH|SOX2|NR2F1|SEMA3B|NRP1|DLL1|RTN4RL1|SEMA3D|DRAXIN	-0.842891	0	10	0	0	-4.71506	10.2467
1	-3.03446	GO:0043010	M1	1	0	GO Biological Processes	19	camera-type eye development	-3.03446	3.11101	4.01816	24155	314	272	11	4.04412	1.19444	1295|4771|4867|5629|6469|7477|8829|23657|28514|64220|93986	COL8A1|NF2|NPHP1|PROX1|SHH|WNT7B|NRP1|SLC7A11|DLL1|STRA6|FOXP2	-0.842891	0	12	0	0	-4.57682	11.4587
1	-3.02568	GO:0003158	M1	1	0	GO Biological Processes	19	endothelium development	-3.02568	4.53749	4.4312	24155	137	272	7	2.57353	0.960105	2246|3383|5629|7477|8829|28514|60484	FGF1|ICAM1|PROX1|WNT7B|NRP1|DLL1|HAPLN2	-0.842891	0	13	0	0	-4.32056	38.0593
1	-3.02228	GO:0060840	M1	1	0	GO Biological Processes	19	artery development	-3.02228	5.32831	4.6286	24155	100	272	6	2.20588	0.89056	5629|6469|6659|8829|11174|64220	PROX1|SHH|SOX4|NRP1|ADAMTS6|STRA6	-0.842891	0	16	0	0	-3.87406	5.32831
1	-3.01169	GO:0150063	M1	1	0	GO Biological Processes	19	visual system development	-3.01169	2.91164	3.93273	24155	366	272	12	4.41176	1.24516	1295|4771|4867|5629|6469|6657|7477|8829|23657|28514|64220|93986	COL8A1|NF2|NPHP1|PROX1|SHH|SOX2|WNT7B|NRP1|SLC7A11|DLL1|STRA6|FOXP2	-0.836417	0	12	0	0	-4.57682	11.4587
1	-2.99361	GO:0120035	M1	1	0	GO Biological Processes	19	regulation of plasma membrane bounded cell projection organization	-2.99361	2.2901	3.69106	24155	698	272	18	6.61765	1.5073	116|577|2042|3383|4804|5274|7025|7454|7869|8829|11141|22999|57520|80258|114788|146760|223117|374946	ADCYAP1|ADGRB3|EPHA3|ICAM1|NGFR|SERPINI1|NR2F1|WAS|SEMA3B|NRP1|IL1RAPL1|RIMS1|HECW2|EFHC2|CSMD3|RTN4RL1|SEMA3D|DRAXIN	-0.822414	0	10	0	0	-4.71506	10.2467
1	-2.98666	GO:0007548	M1	1	0	GO Biological Processes	19	sex differentiation	-2.98666	3.28908	4.03659	24155	270	272	10	3.67647	1.14103	116|638|3293|3383|3623|4323|6469|6932|56956|64220	ADCYAP1|BIK|HSD17B3|ICAM1|INHA|MMP14|SHH|TCF7|LHX9|STRA6	-0.819509	0	6	0	0	-5.03726	6.45856
1	-2.9563	GO:0044772	M1	1	0	GO Biological Processes	19	mitotic cell cycle phase transition	-2.9563	2.41647	3.71088	24155	588	272	16	5.88235	1.42668	990|993|4998|6241|6659|7298|8318|9088|9212|9319|29933|55388|57520|58480|63967|113130	CDC6|CDC25A|ORC1|RRM2|SOX4|TYMS|CDC45|PKMYT1|AURKB|TRIP13|GPR132|MCM10|HECW2|RHOU|CLSPN|CDCA5	-0.81176	0	9	0	0	-4.77963	26.6415
1	-2.96266	GO:0050771	M1	1	0	GO Biological Processes	19	negative regulation of axonogenesis	-2.96266	6.43516	4.8249	24155	69	272	5	1.83824	0.814493	4804|7869|8829|223117|374946	NGFR|SEMA3B|NRP1|SEMA3D|DRAXIN	-0.81176	0	10	0	0	-4.71506	10.2467
1	-2.95647	GO:0008217	M1	1	0	GO Biological Processes	19	regulation of blood pressure	-2.95647	3.90352	4.19599	24155	182	272	8	2.94118	1.02446	59|133|185|1636|1909|2028|8862|28514	ACTA2|ADM|AGTR1|ACE|EDNRA|ENPEP|APLN|DLL1	-0.81176	0	11	0	0	-4.62071	8.17942
1	-2.96128	GO:0048880	M1	1	0	GO Biological Processes	19	sensory system development	-2.96128	2.8724	3.87863	24155	371	272	12	4.41176	1.24516	1295|4771|4867|5629|6469|6657|7477|8829|23657|28514|64220|93986	COL8A1|NF2|NPHP1|PROX1|SHH|SOX2|WNT7B|NRP1|SLC7A11|DLL1|STRA6|FOXP2	-0.81176	0	12	0	0	-4.57682	11.4587
1	-2.95543	GO:0051983	M1	1	0	GO Biological Processes	19	regulation of chromosome segregation	-2.95543	5.17312	4.52937	24155	103	272	6	2.20588	0.89056	990|8313|9212|9319|57520|113130	CDC6|AXIN2|AURKB|TRIP13|HECW2|CDCA5	-0.81176	0	19	0	0	-3.53957	6.96511
1	-2.95964	GO:0008285	M1	1	0	GO Biological Processes	19	negative regulation of cell proliferation	-2.95964	2.2143	3.63493	24155	762	272	19	6.98529	1.54555	116|133|990|2444|2615|3592|4771|4804|5270|5592|5629|6469|6657|6659|8313|8862|10221|28514|55840	ADCYAP1|ADM|CDC6|FRK|LRRC32|IL12A|NF2|NGFR|SERPINE2|PRKG1|PROX1|SHH|SOX2|SOX4|AXIN2|APLN|TRIB1|DLL1|EAF2	-0.81176	0	22	0	0	-3.31846	3.36847
1	-2.9218	GO:0060438	M1	1	0	GO Biological Processes	19	trachea development	-2.9218	14.0219	6.05971	24155	19	272	3	1.10294	0.633262	6469|7477|340419	SHH|WNT7B|RSPO2	-0.804004	0	3	0	0	-7.21601	38.0593
1	-2.92678	GO:0061448	M1	1	0	GO Biological Processes	19	connective tissue development	-2.92678	3.22928	3.96778	24155	275	272	10	3.67647	1.14103	59|1490|2736|3696|6660|7298|7477|8313|144347|340419	ACTA2|CCN2|GLI2|ITGB8|SOX5|TYMS|WNT7B|AXIN2|RFLNA|RSPO2	-0.804004	0	5	0	0	-5.12856	8.53896
1	-2.93587	GO:0048812	M1	1	0	GO Biological Processes	19	neuron projection morphogenesis	-2.93587	2.32976	3.66183	24155	648	272	17	6.25	1.46771	577|1749|2042|2736|4804|6469|7477|7869|8829|11141|22999|56956|57520|84665|128434|223117|374946	ADGRB3|DLX5|EPHA3|GLI2|NGFR|SHH|WNT7B|SEMA3B|NRP1|IL1RAPL1|RIMS1|LHX9|HECW2|MYPN|VSTM2L|SEMA3D|DRAXIN	-0.804004	0	10	0	0	-4.71506	10.2467
1	-2.92447	GO:0031344	M1	1	0	GO Biological Processes	19	regulation of cell projection organization	-2.92447	2.25776	3.62497	24155	708	272	18	6.61765	1.5073	116|577|2042|3383|4804|5274|7025|7454|7869|8829|11141|22999|57520|80258|114788|146760|223117|374946	ADCYAP1|ADGRB3|EPHA3|ICAM1|NGFR|SERPINI1|NR2F1|WAS|SEMA3B|NRP1|IL1RAPL1|RIMS1|HECW2|EFHC2|CSMD3|RTN4RL1|SEMA3D|DRAXIN	-0.804004	0	10	0	0	-4.71506	10.2467
1	-2.94017	GO:0021575	M1	1	0	GO Biological Processes	19	hindbrain morphogenesis	-2.94017	8.66392	5.24134	24155	41	272	4	1.47059	0.729868	2736|5270|5629|28514	GLI2|SERPINE2|PROX1|DLL1	-0.804004	0	13	0	0	-4.32056	38.0593
1	-2.93367	GO:0014812	M1	1	0	GO Biological Processes	19	muscle cell migration	-2.93367	5.12337	4.49715	24155	104	272	6	2.20588	0.89056	1636|3037|5592|8829|10221|84466	ACE|HAS2|PRKG1|NRP1|TRIB1|MEGF10	-0.804004	0	25	1	1	-2.93367	5.3018
1	-2.92678	GO:0098742	M1	1	0	GO Biological Processes	19	cell-cell adhesion via plasma-membrane adhesion molecules	-2.92678	3.22928	3.96778	24155	275	272	10	3.67647	1.14103	3383|3556|5100|11141|54798|56121|56125|64101|84665|128434	ICAM1|IL1RAP|PCDH8|IL1RAPL1|DCHS2|PCDHB15|PCDHB11|LRRC4|MYPN|VSTM2L	-0.804004	0	26	1	1	-2.92678	10.2467
1	-2.90053	GO:0030517	M1	1	0	GO Biological Processes	19	negative regulation of axon extension	-2.90053	8.45763	5.1622	24155	42	272	4	1.47059	0.729868	7869|8829|223117|374946	SEMA3B|NRP1|SEMA3D|DRAXIN	-0.786311	0	10	0	0	-4.71506	10.2467
1	-2.8909	GO:0021510	M1	1	0	GO Biological Processes	19	spinal cord development	-2.8909	5.02671	4.43393	24155	106	272	6	2.20588	0.89056	2736|5629|6469|6659|28514|374946	GLI2|PROX1|SHH|SOX4|DLL1|DRAXIN	-0.785998	0	3	0	0	-7.21601	38.0593
1	-2.87936	GO:0061035	M1	1	0	GO Biological Processes	19	regulation of cartilage development	-2.87936	6.16702	4.68582	24155	72	272	5	1.83824	0.814493	1490|2736|6660|8313|144347	CCN2|GLI2|SOX5|AXIN2|RFLNA	-0.785998	0	5	0	0	-5.12856	8.53896
1	-2.87995	GO:0000082	M1	1	0	GO Biological Processes	19	G1/S transition of mitotic cell cycle	-2.87995	3.18298	3.91386	24155	279	272	10	3.67647	1.14103	990|993|4998|6241|6659|7298|8318|29933|55388|58480	CDC6|CDC25A|ORC1|RRM2|SOX4|TYMS|CDC45|GPR132|MCM10|RHOU	-0.785998	0	9	0	0	-4.77963	26.6415
1	-2.87995	GO:0060485	M1	1	0	GO Biological Processes	19	mesenchyme development	-2.87995	3.18298	3.91386	24155	279	272	10	3.67647	1.14103	59|1909|2042|3037|6469|7869|8313|8829|25937|223117	ACTA2|EDNRA|EPHA3|HAS2|SHH|SEMA3B|AXIN2|NRP1|WWTR1|SEMA3D	-0.785998	0	10	0	0	-4.71506	10.2467
1	-2.88389	GO:0008015	M1	1	0	GO Biological Processes	19	blood circulation	-2.88389	2.46225	3.67088	24155	541	272	15	5.51471	1.38407	59|116|133|185|566|1490|1636|1909|2028|3383|3777|5592|8862|8913|28514	ACTA2|ADCYAP1|ADM|AGTR1|AZU1|CCN2|ACE|EDNRA|ENPEP|ICAM1|KCNK3|PRKG1|APLN|CACNA1G|DLL1	-0.785998	0	11	0	0	-4.62071	8.17942
1	-2.88375	GO:0099537	M1	1	0	GO Biological Processes	19	trans-synaptic signaling	-2.88375	2.23879	3.58585	24155	714	272	18	6.61765	1.5073	116|2898|3556|3777|5100|5270|6855|8913|9127|9495|11141|11346|22999|23467|23657|56125|64101|84073	ADCYAP1|GRIK2|IL1RAP|KCNK3|PCDH8|SERPINE2|SYP|CACNA1G|P2RX6|AKAP5|IL1RAPL1|SYNPO|RIMS1|NPTXR|SLC7A11|PCDHB11|LRRC4|MYCBPAP	-0.785998	0	27	1	1	-2.88375	2.23879
1	-2.8525	GO:0030239	M1	1	0	GO Biological Processes	19	myofibril assembly	-2.8525	6.08254	4.64121	24155	73	272	5	1.83824	0.814493	4629|4703|5629|25802|84665	MYH11|NEB|PROX1|LMOD1|MYPN	-0.762516	0	28	1	1	-2.8525	6.08254
1	-2.84359	GO:0099536	M1	1	0	GO Biological Processes	19	synaptic signaling	-2.84359	2.22013	3.5471	24155	720	272	18	6.61765	1.5073	116|2898|3556|3777|5100|5270|6855|8913|9127|9495|11141|11346|22999|23467|23657|56125|64101|84073	ADCYAP1|GRIK2|IL1RAP|KCNK3|PCDH8|SERPINE2|SYP|CACNA1G|P2RX6|AKAP5|IL1RAPL1|SYNPO|RIMS1|NPTXR|SLC7A11|PCDHB11|LRRC4|MYCBPAP	-0.756958	0	27	0	0	-2.88375	2.23879
1	-2.83947	GO:0060560	M1	1	0	GO Biological Processes	19	developmental growth involved in morphogenesis	-2.83947	3.40105	3.9472	24155	235	272	9	3.30882	1.08454	2246|6469|7477|7869|8829|22999|55083|223117|374946	FGF1|SHH|WNT7B|SEMA3B|NRP1|RIMS1|KIF26B|SEMA3D|DRAXIN	-0.756783	0	2	0	0	-7.67617	8.32548
1	-2.83679	GO:0120039	M1	1	0	GO Biological Processes	19	plasma membrane bounded cell projection morphogenesis	-2.83679	2.28049	3.5651	24155	662	272	17	6.25	1.46771	577|1749|2042|2736|4804|6469|7477|7869|8829|11141|22999|56956|57520|84665|128434|223117|374946	ADGRB3|DLX5|EPHA3|GLI2|NGFR|SHH|WNT7B|SEMA3B|NRP1|IL1RAPL1|RIMS1|LHX9|HECW2|MYPN|VSTM2L|SEMA3D|DRAXIN	-0.756783	0	10	0	0	-4.71506	10.2467
1	-2.82856	GO:0072009	M1	1	0	GO Biological Processes	19	nephron epithelium development	-2.82856	4.88836	4.34203	24155	109	272	6	2.20588	0.89056	2246|6469|7477|25937|28514|55083	FGF1|SHH|WNT7B|WWTR1|DLL1|KIF26B	-0.755085	0	2	0	0	-7.67617	8.32548
1	-2.82925	GO:0007423	M1	1	0	GO Biological Processes	19	sensory organ development	-2.82925	2.4308	3.61562	24155	548	272	15	5.51471	1.38407	1295|1749|2736|3777|4771|4867|5629|6469|6657|7477|8829|23657|28514|64220|93986	COL8A1|DLX5|GLI2|KCNK3|NF2|NPHP1|PROX1|SHH|SOX2|WNT7B|NRP1|SLC7A11|DLL1|STRA6|FOXP2	-0.755085	0	12	0	0	-4.57682	11.4587
1	-2.8091	GO:0048858	M1	1	0	GO Biological Processes	19	cell projection morphogenesis	-2.8091	2.2668	3.53791	24155	666	272	17	6.25	1.46771	577|1749|2042|2736|4804|6469|7477|7869|8829|11141|22999|56956|57520|84665|128434|223117|374946	ADGRB3|DLX5|EPHA3|GLI2|NGFR|SHH|WNT7B|SEMA3B|NRP1|IL1RAPL1|RIMS1|LHX9|HECW2|MYPN|VSTM2L|SEMA3D|DRAXIN	-0.738857	0	10	0	0	-4.71506	10.2467
1	-2.80006	GO:0021536	M1	1	0	GO Biological Processes	19	diencephalon development	-2.80006	5.92034	4.55441	24155	75	272	5	1.83824	0.814493	116|2736|6469|6657|8829	ADCYAP1|GLI2|SHH|SOX2|NRP1	-0.733021	0	3	0	0	-7.21601	38.0593
1	-2.7909	GO:0010720	M1	1	0	GO Biological Processes	19	positive regulation of cell development	-2.7909	2.40882	3.57666	24155	553	272	15	5.51471	1.38407	116|2042|2736|3037|4804|5270|5274|5629|6469|7133|7516|8829|10221|11141|22999	ADCYAP1|EPHA3|GLI2|HAS2|NGFR|SERPINE2|SERPINI1|PROX1|SHH|TNFRSF1B|XRCC2|NRP1|TRIB1|IL1RAPL1|RIMS1	-0.727039	0	21	0	0	-3.33946	2.6264
1	-2.77445	GO:0007492	M1	1	0	GO Biological Processes	19	endoderm development	-2.77445	5.84244	4.51218	24155	76	272	5	1.83824	0.814493	1295|3909|4313|4323|6657	COL8A1|LAMA3|MMP2|MMP14|SOX2	-0.713755	0	17	0	0	-3.83113	9.86724
1	-2.76827	GO:0003279	M1	1	0	GO Biological Processes	19	cardiac septum development	-2.76827	4.75742	4.25343	24155	112	272	6	2.20588	0.89056	5629|6659|8829|11174|64220|129446	PROX1|SOX4|NRP1|ADAMTS6|STRA6|XIRP2	-0.710712	0	16	0	0	-3.87406	5.32831
1	-2.71725	GO:0048806	M1	1	0	GO Biological Processes	19	genitalia development	-2.71725	7.55788	4.80249	24155	47	272	4	1.47059	0.729868	3293|6469|6932|64220	HSD17B3|SHH|TCF7|STRA6	-0.677199	0	3	0	0	-7.21601	38.0593
1	-2.71641	GO:0010977	M1	1	0	GO Biological Processes	19	negative regulation of neuron projection development	-2.71641	4.01056	4.01274	24155	155	272	7	2.57353	0.960105	4804|7025|7869|8829|146760|223117|374946	NGFR|NR2F1|SEMA3B|NRP1|RTN4RL1|SEMA3D|DRAXIN	-0.677199	0	10	0	0	-4.71506	10.2467
1	-2.71725	GO:0021695	M1	1	0	GO Biological Processes	19	cerebellar cortex development	-2.71725	7.55788	4.80249	24155	47	272	4	1.47059	0.729868	2736|5270|5629|28514	GLI2|SERPINE2|PROX1|DLL1	-0.677199	0	13	0	0	-4.32056	38.0593
1	-2.71938	GO:0032956	M1	1	0	GO Biological Processes	19	regulation of actin cytoskeleton organization	-2.71938	2.8397	3.66751	24155	344	272	11	4.04412	1.19444	1490|2042|3383|4703|4771|5629|7454|8829|11346|25802|58480	CCN2|EPHA3|ICAM1|NEB|NF2|PROX1|WAS|NRP1|SYNPO|LMOD1|RHOU	-0.677199	0	15	0	0	-4.12286	5.82329
1	-2.72306	GO:0006310	M1	1	0	GO Biological Processes	19	DNA recombination	-2.72306	3.03089	3.73252	24155	293	272	10	3.67647	1.14103	2187|6932|7454|7516|8318|9319|9401|10635|29893|51659	FANCB|TCF7|WAS|XRCC2|CDC45|TRIP13|RECQL4|RAD51AP1|PSMC3IP|GINS2	-0.677199	0	24	0	0	-3.08218	4.63907
1	-2.73145	GO:0009314	M1	1	0	GO Biological Processes	19	response to radiation	-2.73145	2.5712	3.5864	24155	449	272	13	4.77941	1.29351	440|611|993|3383|3592|4867|7516|9212|10635|11346|23657|58473|90427	ASNS|OPN1SW|CDC25A|ICAM1|IL12A|NPHP1|XRCC2|AURKB|RAD51AP1|SYNPO|SLC7A11|PLEKHB1|BMF	-0.677199	0	29	1	1	-2.73145	2.81921
1	-2.70994	GO:0046660	M1	1	0	GO Biological Processes	19	female sex differentiation	-2.70994	4.63331	4.16792	24155	115	272	6	2.20588	0.89056	116|3383|3623|4323|56956|64220	ADCYAP1|ICAM1|INHA|MMP14|LHX9|STRA6	-0.673718	0	6	0	0	-5.03726	6.45856
1	-2.69997	GO:0001570	M1	1	0	GO Biological Processes	19	vasculogenesis	-2.69997	5.62058	4.38988	24155	79	272	5	1.83824	0.814493	133|3037|3696|6469|7477	ADM|HAS2|ITGB8|SHH|WNT7B	-0.66671	0	30	1	1	-2.69997	9.51484
1	-2.6962	GO:0001503	M1	1	0	GO Biological Processes	19	ossification	-2.6962	2.67083	3.59143	24155	399	272	12	4.41176	1.24516	1490|1749|2736|4313|4323|6469|6657|7477|8313|25937|144347|340419	CCN2|DLX5|GLI2|MMP2|MMP14|SHH|SOX2|WNT7B|AXIN2|WWTR1|RFLNA|RSPO2	-0.665881	0	3	0	0	-7.21601	38.0593
1	-2.68123	GO:0032990	M1	1	0	GO Biological Processes	19	cell part morphogenesis	-2.68123	2.20392	3.41132	24155	685	272	17	6.25	1.46771	577|1749|2042|2736|4804|6469|7477|7869|8829|11141|22999|56956|57520|84665|128434|223117|374946	ADGRB3|DLX5|EPHA3|GLI2|NGFR|SHH|WNT7B|SEMA3B|NRP1|IL1RAPL1|RIMS1|LHX9|HECW2|MYPN|VSTM2L|SEMA3D|DRAXIN	-0.655486	0	10	0	0	-4.71506	10.2467
1	-2.67997	GO:0006302	M1	1	0	GO Biological Processes	19	double-strand break repair	-2.67997	3.22277	3.75484	24155	248	272	9	3.30882	1.08454	2187|7454|7516|8318|9319|9401|10635|51659|113130	FANCB|WAS|XRCC2|CDC45|TRIP13|RECQL4|RAD51AP1|GINS2|CDCA5	-0.655486	0	24	0	0	-3.08218	4.63907
1	-2.67434	GO:0097150	M1	1	0	GO Biological Processes	19	neuronal stem cell population maintenance	-2.67434	11.5833	5.41904	24155	23	272	3	1.10294	0.633262	5629|6657|28514	PROX1|SOX2|DLL1	-0.652736	0	13	0	0	-4.32056	38.0593
1	-2.66954	GO:0044843	M1	1	0	GO Biological Processes	19	cell cycle G1/S phase transition	-2.66954	2.98004	3.67036	24155	298	272	10	3.67647	1.14103	990|993|4998|6241|6659|7298|8318|29933|55388|58480	CDC6|CDC25A|ORC1|RRM2|SOX4|TYMS|CDC45|GPR132|MCM10|RHOU	-0.650812	0	9	0	0	-4.77963	26.6415
1	-2.66056	GO:0045785	M1	1	0	GO Biological Processes	19	positive regulation of cell adhesion	-2.66056	2.64432	3.55242	24155	403	272	12	4.41176	1.24516	566|972|1295|2736|3037|3383|3592|6469|6657|8728|8829|55083	AZU1|CD74|COL8A1|GLI2|HAS2|ICAM1|IL12A|SHH|SOX2|ADAM19|NRP1|KIF26B	-0.64467	0	8	0	0	-4.85917	4.72368
1	-2.65011	GO:0048546	M1	1	0	GO Biological Processes	19	digestive tract morphogenesis	-2.65011	7.2494	4.67313	24155	49	272	4	1.47059	0.729868	2736|6469|6932|64220	GLI2|SHH|TCF7|STRA6	-0.642124	0	3	0	0	-7.21601	38.0593
1	-2.64404	GO:0007266	M1	1	0	GO Biological Processes	19	Rho protein signal transduction	-2.64404	3.48255	3.80003	24155	204	272	8	2.94118	1.02446	19|185|4804|5924|7454|8829|57480|58480	ABCA1|AGTR1|NGFR|RASGRF2|WAS|NRP1|PLEKHG1|RHOU	-0.642124	0	7	0	0	-4.98377	27.3247
1	-2.64568	GO:0044770	M1	1	0	GO Biological Processes	19	cell cycle phase transition	-2.64568	2.25179	3.40037	24155	631	272	16	5.88235	1.42668	990|993|4998|6241|6659|7298|8318|9088|9212|9319|29933|55388|57520|58480|63967|113130	CDC6|CDC25A|ORC1|RRM2|SOX4|TYMS|CDC45|PKMYT1|AURKB|TRIP13|GPR132|MCM10|HECW2|RHOU|CLSPN|CDCA5	-0.642124	0	9	0	0	-4.77963	26.6415
1	-2.64404	GO:1902905	M1	1	0	GO Biological Processes	19	positive regulation of supramolecular fiber organization	-2.64404	3.48255	3.80003	24155	204	272	8	2.94118	1.02446	1490|3383|4771|5629|7454|8829|11346|25802	CCN2|ICAM1|NF2|PROX1|WAS|NRP1|SYNPO|LMOD1	-0.642124	0	15	0	0	-4.12286	5.82329
1	-2.65146	GO:0003002	M1	1	0	GO Biological Processes	19	regionalization	-2.65146	2.78307	3.59113	24155	351	272	11	4.04412	1.19444	2246|2736|5100|6469|7477|7516|8313|8829|28514|55502|64399	FGF1|GLI2|PCDH8|SHH|WNT7B|XRCC2|AXIN2|NRP1|DLL1|HES6|HHIP	-0.642124	0	31	1	1	-2.65146	5.07458
1	-2.63851	GO:0046661	M1	1	0	GO Biological Processes	19	male sex differentiation	-2.63851	3.88523	3.90763	24155	160	272	7	2.57353	0.960105	638|3293|3383|3623|4323|6469|56956	BIK|HSD17B3|ICAM1|INHA|MMP14|SHH|LHX9	-0.642051	0	6	0	0	-5.03726	6.45856
1	-2.63851	GO:0061572	M1	1	0	GO Biological Processes	19	actin filament bundle organization	-2.63851	3.88523	3.90763	24155	160	272	7	2.57353	0.960105	1490|4771|7454|8829|11346|144347|339768	CCN2|NF2|WAS|NRP1|SYNPO|RFLNA|ESPNL	-0.642051	0	15	0	0	-4.12286	5.82329
1	-2.63502	GO:0045446	M1	1	0	GO Biological Processes	19	endothelial cell differentiation	-2.63502	4.47757	4.05838	24155	119	272	6	2.20588	0.89056	3383|5629|7477|8829|28514|60484	ICAM1|PROX1|WNT7B|NRP1|DLL1|HAPLN2	-0.641271	0	13	0	0	-4.32056	38.0593
1	-2.62878	GO:0014032	M1	1	0	GO Biological Processes	19	neural crest cell development	-2.62878	5.41495	4.27368	24155	82	272	5	1.83824	0.814493	1909|6469|7869|8829|223117	EDNRA|SHH|SEMA3B|NRP1|SEMA3D	-0.637715	0	10	0	0	-4.71506	10.2467
1	-2.61674	GO:0050808	M1	1	0	GO Biological Processes	19	synapse organization	-2.61674	2.61192	3.50431	24155	408	272	12	4.41176	1.24516	577|1821|3556|5100|7477|8829|11141|11346|23657|27286|56125|64101	ADGRB3|DRP2|IL1RAP|PCDH8|WNT7B|NRP1|IL1RAPL1|SYNPO|SLC7A11|SRPX2|PCDHB11|LRRC4	-0.631007	0	26	0	0	-2.92678	10.2467
1	-2.61678	GO:0072089	M1	1	0	GO Biological Processes	19	stem cell proliferation	-2.61678	4.44026	4.03175	24155	120	272	6	2.20588	0.89056	1636|4771|6469|6660|7477|64399	ACE|NF2|SHH|SOX5|WNT7B|HHIP	-0.631007	0	32	1	1	-2.61678	5.04575
1	-2.59873	GO:0022409	M1	1	0	GO Biological Processes	19	positive regulation of cell-cell adhesion	-2.59873	3.1343	3.65646	24155	255	272	9	3.30882	1.08454	972|2736|3037|3383|3592|6469|6657|8728|55083	CD74|GLI2|HAS2|ICAM1|IL12A|SHH|SOX2|ADAM19|KIF26B	-0.618254	0	8	0	0	-4.85917	4.72368
1	-2.59872	GO:0001704	M1	1	0	GO Biological Processes	19	formation of primary germ layer	-2.59872	4.40356	4.00542	24155	121	272	6	2.20588	0.89056	1295|3909|4313|4323|4771|6657	COL8A1|LAMA3|MMP2|MMP14|NF2|SOX2	-0.618254	0	17	0	0	-3.83113	9.86724
1	-2.58604	GO:0030071	M1	1	0	GO Biological Processes	19	regulation of mitotic metaphase/anaphase transition	-2.58604	6.96511	4.55086	24155	51	272	4	1.47059	0.729868	990|9212|9319|57520	CDC6|AURKB|TRIP13|HECW2	-0.610333	0	19	0	0	-3.53957	6.96511
1	-2.58302	GO:0050886	M1	1	0	GO Biological Processes	19	endocrine process	-2.58302	5.28602	4.19934	24155	84	272	5	1.83824	0.814493	185|1636|2028|3623|8862	AGTR1|ACE|ENPEP|INHA|APLN	-0.610333	0	20	0	0	-3.46569	11.8407
1	-2.58302	GO:0014910	M1	1	0	GO Biological Processes	19	regulation of smooth muscle cell migration	-2.58302	5.28602	4.19934	24155	84	272	5	1.83824	0.814493	1636|3037|5592|8829|10221	ACE|HAS2|PRKG1|NRP1|TRIB1	-0.610333	0	25	0	0	-2.93367	5.3018
1	-2.57178	GO:0048667	M1	1	0	GO Biological Processes	19	cell morphogenesis involved in neuron differentiation	-2.57178	2.28487	3.35142	24155	583	272	15	5.51471	1.38407	577|1749|2042|2736|4804|6469|7869|8829|11141|56956|57520|84665|128434|223117|374946	ADGRB3|DLX5|EPHA3|GLI2|NGFR|SHH|SEMA3B|NRP1|IL1RAPL1|LHX9|HECW2|MYPN|VSTM2L|SEMA3D|DRAXIN	-0.601653	0	10	0	0	-4.71506	10.2467
1	-2.56803	GO:0032461	M1	1	0	GO Biological Processes	19	positive regulation of protein oligomerization	-2.56803	10.6566	5.15526	24155	25	272	3	1.10294	0.633262	638|4312|90427	BIK|MMP1|BMF	-0.600451	0	33	1	1	-2.56803	10.6566
1	-2.53856	GO:0014031	M1	1	0	GO Biological Processes	19	mesenchymal cell development	-2.53856	5.16309	4.12734	24155	86	272	5	1.83824	0.814493	1909|6469|7869|8829|223117	EDNRA|SHH|SEMA3B|NRP1|SEMA3D	-0.583494	0	10	0	0	-4.71506	10.2467
1	-2.53856	GO:0048864	M1	1	0	GO Biological Processes	19	stem cell development	-2.53856	5.16309	4.12734	24155	86	272	5	1.83824	0.814493	1909|6469|7869|8829|223117	EDNRA|SHH|SEMA3B|NRP1|SEMA3D	-0.583494	0	10	0	0	-4.71506	10.2467
1	-2.54128	GO:0002064	M1	1	0	GO Biological Processes	19	epithelial cell development	-2.54128	3.35114	3.66937	24155	212	272	8	2.94118	1.02446	59|3383|5629|7298|7477|28514|29842|60484	ACTA2|ICAM1|PROX1|TYMS|WNT7B|DLL1|TFCP2L1|HAPLN2	-0.583494	0	13	0	0	-4.32056	38.0593
1	-2.54256	GO:0003007	M1	1	0	GO Biological Processes	19	heart morphogenesis	-2.54256	3.07402	3.58824	24155	260	272	9	3.30882	1.08454	1363|3037|5629|6469|6659|8313|8829|28514|129446	CPE|HAS2|PROX1|SHH|SOX4|AXIN2|NRP1|DLL1|XIRP2	-0.583494	0	16	0	0	-3.87406	5.32831
1	-2.54565	GO:0019218	M1	1	0	GO Biological Processes	19	regulation of steroid metabolic process	-2.54565	4.29702	3.92809	24155	124	272	6	2.20588	0.89056	133|185|2224|2246|4597|5629	ADM|AGTR1|FDPS|FGF1|MVD|PROX1	-0.583494	0	34	1	1	-2.54565	4.67396
1	-2.52137	GO:0032102	M1	1	0	GO Biological Processes	19	negative regulation of response to external stimulus	-2.52137	2.67632	3.44382	24155	365	272	11	4.04412	1.19444	116|4277|5270|5592|7133|7869|8829|10221|11240|146760|223117	ADCYAP1|MICB|SERPINE2|PRKG1|TNFRSF1B|SEMA3B|NRP1|TRIB1|PADI2|RTN4RL1|SEMA3D	-0.58026	0	10	0	0	-4.71506	10.2467
1	-2.51839	GO:0048843	M1	1	0	GO Biological Processes	19	negative regulation of axon extension involved in axon guidance	-2.51839	10.2467	5.03432	24155	26	272	3	1.10294	0.633262	7869|8829|223117	SEMA3B|NRP1|SEMA3D	-0.58026	0	10	0	0	-4.71506	10.2467
1	-2.52481	GO:1902099	M1	1	0	GO Biological Processes	19	regulation of metaphase/anaphase transition of cell cycle	-2.52481	6.70228	4.43501	24155	53	272	4	1.47059	0.729868	990|9212|9319|57520	CDC6|AURKB|TRIP13|HECW2	-0.58026	0	19	0	0	-3.53957	6.96511
1	-2.51839	GO:0003081	M1	1	0	GO Biological Processes	19	regulation of systemic arterial blood pressure by renin-angiotensin	-2.51839	10.2467	5.03432	24155	26	272	3	1.10294	0.633262	185|1636|2028	AGTR1|ACE|ENPEP	-0.58026	0	20	0	0	-3.46569	11.8407
1	-2.52857	GO:0050769	M1	1	0	GO Biological Processes	19	positive regulation of neurogenesis	-2.52857	2.43558	3.36862	24155	474	272	13	4.77941	1.29351	116|2042|2736|4804|5270|5274|5629|6469|7133|7516|8829|11141|22999	ADCYAP1|EPHA3|GLI2|NGFR|SERPINE2|SERPINI1|PROX1|SHH|TNFRSF1B|XRCC2|NRP1|IL1RAPL1|RIMS1	-0.58026	0	21	0	0	-3.33946	2.6264
1	-2.51839	GO:0099560	M1	1	0	GO Biological Processes	19	synaptic membrane adhesion	-2.51839	10.2467	5.03432	24155	26	272	3	1.10294	0.633262	3556|5100|64101	IL1RAP|PCDH8|LRRC4	-0.58026	0	26	0	0	-2.92678	10.2467
1	-2.51839	GO:0048169	M1	1	0	GO Biological Processes	19	regulation of long-term neuronal synaptic plasticity	-2.51839	10.2467	5.03432	24155	26	272	3	1.10294	0.633262	2898|6855|11346	GRIK2|SYP|SYNPO	-0.58026	0	35	1	1	-2.51839	10.2467
1	-2.49519	GO:0021515	M1	1	0	GO Biological Processes	19	cell differentiation in spinal cord	-2.49519	6.57816	4.3793	24155	54	272	4	1.47059	0.729868	2736|6469|6659|374946	GLI2|SHH|SOX4|DRAXIN	-0.571077	0	3	0	0	-7.21601	38.0593
1	-2.50589	GO:0060538	M1	1	0	GO Biological Processes	19	skeletal muscle organ development	-2.50589	3.67832	3.72873	24155	169	272	7	2.57353	0.960105	6469|9242|28514|51676|64220|84466|93986	SHH|MSC|DLL1|ASB2|STRA6|MEGF10|FOXP2	-0.571077	0	14	0	0	-4.17977	17.761
1	-2.49532	GO:1901888	M1	1	0	GO Biological Processes	19	regulation of cell junction assembly	-2.49532	5.04575	4.05755	24155	88	272	5	1.83824	0.814493	1636|2042|4323|4867|8829	ACE|EPHA3|MMP14|NPHP1|NRP1	-0.571077	0	18	0	0	-3.69647	9.25054
1	-2.49519	GO:0007091	M1	1	0	GO Biological Processes	19	metaphase/anaphase transition of mitotic cell cycle	-2.49519	6.57816	4.3793	24155	54	272	4	1.47059	0.729868	990|9212|9319|57520	CDC6|AURKB|TRIP13|HECW2	-0.571077	0	19	0	0	-3.53957	6.96511
1	-2.4967	GO:0009416	M1	1	0	GO Biological Processes	19	response to light stimulus	-2.4967	2.81921	3.46832	24155	315	272	10	3.67647	1.14103	440|611|993|3592|4867|9212|11346|23657|58473|90427	ASNS|OPN1SW|CDC25A|IL12A|NPHP1|AURKB|SYNPO|SLC7A11|PLEKHB1|BMF	-0.571077	0	29	0	0	-2.73145	2.81921
1	-2.49532	GO:2000177	M1	1	0	GO Biological Processes	19	regulation of neural precursor cell proliferation	-2.49532	5.04575	4.05755	24155	88	272	5	1.83824	0.814493	116|2736|4771|5629|6469	ADCYAP1|GLI2|NF2|PROX1|SHH	-0.571077	0	32	0	0	-2.61678	5.04575
1	-2.49183	GO:0000075	M1	1	0	GO Biological Processes	19	cell cycle checkpoint	-2.49183	3.28908	3.60636	24155	216	272	8	2.94118	1.02446	990|4998|5629|6659|8318|9212|9319|63967	CDC6|ORC1|PROX1|SOX4|CDC45|AURKB|TRIP13|CLSPN	-0.570003	0	9	0	0	-4.77963	26.6415
1	-2.47767	GO:0003205	M1	1	0	GO Biological Processes	19	cardiac chamber development	-2.47767	3.6353	3.69064	24155	171	272	7	2.57353	0.960105	1363|5629|6659|8829|11174|64220|129446	CPE|PROX1|SOX4|NRP1|ADAMTS6|STRA6|XIRP2	-0.559126	0	16	0	0	-3.87406	5.32831
1	-2.47415	GO:0061053	M1	1	0	GO Biological Processes	19	somite development	-2.47415	4.98905	4.02344	24155	89	272	5	1.83824	0.814493	5100|6469|7516|8313|28514	PCDH8|SHH|XRCC2|AXIN2|DLL1	-0.559126	0	31	0	0	-2.65146	5.07458
1	-2.47415	GO:0060021	M1	1	0	GO Biological Processes	19	roof of mouth development	-2.47415	4.98905	4.02344	24155	89	272	5	1.83824	0.814493	1749|2615|6469|9242|80144	DLX5|LRRC32|SHH|MSC|FRAS1	-0.559126	0	36	1	1	-2.47415	4.98905
1	-2.4662	GO:0001541	M1	1	0	GO Biological Processes	19	ovarian follicle development	-2.4662	6.45856	4.32499	24155	55	272	4	1.47059	0.729868	116|3383|3623|4323	ADCYAP1|ICAM1|INHA|MMP14	-0.553428	0	6	0	0	-5.03726	6.45856
1	-2.45326	GO:0001656	M1	1	0	GO Biological Processes	19	metanephros development	-2.45326	4.93362	3.98984	24155	90	272	5	1.83824	0.814493	6469|7477|25937|55083|80144	SHH|WNT7B|WWTR1|KIF26B|FRAS1	-0.547145	0	2	0	0	-7.67617	8.32548
1	-2.45554	GO:0043583	M1	1	0	GO Biological Processes	19	ear development	-2.45554	3.24402	3.56007	24155	219	272	8	2.94118	1.02446	1749|2736|3777|5629|6469|6657|28514|64220	DLX5|GLI2|KCNK3|PROX1|SHH|SOX2|DLL1|STRA6	-0.547145	0	3	0	0	-7.21601	38.0593
1	-2.45326	GO:0042475	M1	1	0	GO Biological Processes	19	odontogenesis of dentin-containing tooth	-2.45326	4.93362	3.98984	24155	90	272	5	1.83824	0.814493	133|2736|4771|6469|340419	ADM|GLI2|NF2|SHH|RSPO2	-0.547145	0	3	0	0	-7.21601	38.0593
1	-2.43782	GO:0044784	M1	1	0	GO Biological Processes	19	metaphase/anaphase transition of cell cycle	-2.43782	6.34322	4.27201	24155	56	272	4	1.47059	0.729868	990|9212|9319|57520	CDC6|AURKB|TRIP13|HECW2	-0.533908	0	19	0	0	-3.53957	6.96511
1	-2.43265	GO:0014033	M1	1	0	GO Biological Processes	19	neural crest cell differentiation	-2.43265	4.8794	3.95673	24155	91	272	5	1.83824	0.814493	1909|6469|7869|8829|223117	EDNRA|SHH|SEMA3B|NRP1|SEMA3D	-0.533099	0	10	0	0	-4.71506	10.2467
1	-2.43265	GO:0014909	M1	1	0	GO Biological Processes	19	smooth muscle cell migration	-2.43265	4.8794	3.95673	24155	91	272	5	1.83824	0.814493	1636|3037|5592|8829|10221	ACE|HAS2|PRKG1|NRP1|TRIB1	-0.533099	0	25	0	0	-2.93367	5.3018
1	-2.42521	GO:1902668	M1	1	0	GO Biological Processes	19	negative regulation of axon guidance	-2.42521	9.51484	4.81103	24155	28	272	3	1.10294	0.633262	7869|8829|223117	SEMA3B|NRP1|SEMA3D	-0.532127	0	10	0	0	-4.71506	10.2467
1	-2.42521	GO:0008209	M1	1	0	GO Biological Processes	19	androgen metabolic process	-2.42521	9.51484	4.81103	24155	28	272	3	1.10294	0.633262	133|3293|6469	ADM|HSD17B3|SHH	-0.532127	0	30	0	0	-2.69997	9.51484
1	-2.42521	GO:0085029	M1	1	0	GO Biological Processes	19	extracellular matrix assembly	-2.42521	9.51484	4.81103	24155	28	272	3	1.10294	0.633262	3037|4629|60484	HAS2|MYH11|HAPLN2	-0.532127	0	37	1	1	-2.42521	9.51484
1	-2.41167	GO:0042476	M1	1	0	GO Biological Processes	19	odontogenesis	-2.41167	4.0366	3.73332	24155	132	272	6	2.20588	0.89056	133|2736|4771|6469|8313|340419	ADM|GLI2|NF2|SHH|AXIN2|RSPO2	-0.521198	0	3	0	0	-7.21601	38.0593
1	-2.41002	GO:0010965	M1	1	0	GO Biological Processes	19	regulation of mitotic sister chromatid separation	-2.41002	6.23194	4.22031	24155	57	272	4	1.47059	0.729868	990|9212|9319|57520	CDC6|AURKB|TRIP13|HECW2	-0.521198	0	19	0	0	-3.53957	6.96511
1	-2.39224	GO:0010972	M1	1	0	GO Biological Processes	19	negative regulation of G2/M transition of mitotic cell cycle	-2.39224	4.77447	3.89194	24155	93	272	5	1.83824	0.814493	990|4998|9212|29933|63967	CDC6|ORC1|AURKB|GPR132|CLSPN	-0.505529	0	9	0	0	-4.77963	26.6415
1	-2.38138	GO:0060441	M1	1	0	GO Biological Processes	19	epithelial tube branching involved in lung morphogenesis	-2.38138	9.18674	4.70762	24155	29	272	3	1.10294	0.633262	6469|64399|340419	SHH|HHIP|RSPO2	-0.501773	0	3	0	0	-7.21601	38.0593
1	-2.37344	GO:0001649	M1	1	0	GO Biological Processes	19	osteoblast differentiation	-2.37344	3.14355	3.45509	24155	226	272	8	2.94118	1.02446	1749|2736|6469|6657|7477|8313|25937|340419	DLX5|GLI2|SHH|SOX2|WNT7B|AXIN2|WWTR1|RSPO2	-0.501773	0	3	0	0	-7.21601	38.0593
1	-2.36894	GO:0048736	M1	1	0	GO Biological Processes	19	appendage development	-2.36894	3.47283	3.54378	24155	179	272	7	2.57353	0.960105	1749|2736|6469|6659|23657|80144|340419	DLX5|GLI2|SHH|SOX4|SLC7A11|FRAS1|RSPO2	-0.501773	0	3	0	0	-7.21601	38.0593
1	-2.36894	GO:0060173	M1	1	0	GO Biological Processes	19	limb development	-2.36894	3.47283	3.54378	24155	179	272	7	2.57353	0.960105	1749|2736|6469|6659|23657|80144|340419	DLX5|GLI2|SHH|SOX4|SLC7A11|FRAS1|RSPO2	-0.501773	0	3	0	0	-7.21601	38.0593
1	-2.37243	GO:0045621	M1	1	0	GO Biological Processes	19	positive regulation of lymphocyte differentiation	-2.37243	4.72368	3.86024	24155	94	272	5	1.83824	0.814493	972|2736|3592|4323|6469	CD74|GLI2|IL12A|MMP14|SHH	-0.501773	0	8	0	0	-4.85917	4.72368
1	-2.37247	GO:0006260	M1	1	0	GO Biological Processes	19	DNA replication	-2.37247	2.89582	3.38048	24155	276	272	9	3.30882	1.08454	990|2736|4998|6241|8318|9401|51659|55388|63967	CDC6|GLI2|ORC1|RRM2|CDC45|RECQL4|GINS2|MCM10|CLSPN	-0.501773	0	9	0	0	-4.77963	26.6415
1	-2.38279	GO:0001755	M1	1	0	GO Biological Processes	19	neural crest cell migration	-2.38279	6.12449	4.16983	24155	58	272	4	1.47059	0.729868	6469|7869|8829|223117	SHH|SEMA3B|NRP1|SEMA3D	-0.501773	0	10	0	0	-4.71506	10.2467
1	-2.3679	GO:0061061	M1	1	0	GO Biological Processes	19	muscle structure development	-2.3679	2.10813	3.11386	24155	674	272	16	5.88235	1.42668	133|577|4323|4629|4703|5629|6469|9242|25802|28514|51676|64220|84466|84665|93986|129446	ADM|ADGRB3|MMP14|MYH11|NEB|PROX1|SHH|MSC|LMOD1|DLL1|ASB2|STRA6|MEGF10|MYPN|FOXP2|XIRP2	-0.501773	0	14	0	0	-4.17977	17.761
1	-2.37344	GO:0051495	M1	1	0	GO Biological Processes	19	positive regulation of cytoskeleton organization	-2.37344	3.14355	3.45509	24155	226	272	8	2.94118	1.02446	1490|3383|4771|5629|7454|8829|11346|25802	CCN2|ICAM1|NF2|PROX1|WAS|NRP1|SYNPO|LMOD1	-0.501773	0	15	0	0	-4.12286	5.82329
1	-2.38138	GO:0015949	M1	1	0	GO Biological Processes	19	nucleobase-containing small molecule interconversion	-2.38138	9.18674	4.70762	24155	29	272	3	1.10294	0.633262	6241|7298|158067	RRM2|TYMS|AK8	-0.501773	0	38	1	1	-2.38138	9.18674
1	-2.36375	GO:0044057	M1	1	0	GO Biological Processes	19	regulation of system process	-2.36375	2.16951	3.13263	24155	614	272	15	5.51471	1.38407	133|185|1490|1636|3383|3623|3777|5592|7133|8862|8913|11343|22999|23467|85446	ADM|AGTR1|CCN2|ACE|ICAM1|INHA|KCNK3|PRKG1|TNFRSF1B|APLN|CACNA1G|MGLL|RIMS1|NPTXR|ZFHX2	-0.499634	0	11	0	0	-4.62071	8.17942
1	-2.35617	GO:0051271	M1	1	0	GO Biological Processes	19	negative regulation of cellular component movement	-2.35617	2.5439	3.25458	24155	384	272	11	4.04412	1.19444	972|4771|5592|6469|7454|7869|8829|10221|11240|50859|223117	CD74|NF2|PRKG1|SHH|WAS|SEMA3B|NRP1|TRIB1|PADI2|SPOCK3|SEMA3D	-0.496693	0	10	0	0	-4.71506	10.2467
1	-2.35609	GO:0097755	M1	1	0	GO Biological Processes	19	positive regulation of blood vessel diameter	-2.35609	6.02069	4.12051	24155	59	272	4	1.47059	0.729868	116|133|5592|8862	ADCYAP1|ADM|PRKG1|APLN	-0.496693	0	11	0	0	-4.62071	8.17942
1	-2.35288	GO:0110020	M1	1	0	GO Biological Processes	19	regulation of actomyosin structure organization	-2.35288	4.67396	3.82897	24155	95	272	5	1.83824	0.814493	1490|4771|5629|7454|8829	CCN2|NF2|PROX1|WAS|NRP1	-0.496693	0	15	0	0	-4.12286	5.82329
1	-2.35288	GO:0050810	M1	1	0	GO Biological Processes	19	regulation of steroid biosynthetic process	-2.35288	4.67396	3.82897	24155	95	272	5	1.83824	0.814493	133|2224|2246|4597|5629	ADM|FDPS|FGF1|MVD|PROX1	-0.496693	0	34	0	0	-2.54565	4.67396
1	-2.34585	GO:0008202	M1	1	0	GO Biological Processes	19	steroid metabolic process	-2.34585	2.68293	3.2901	24155	331	272	10	3.67647	1.14103	19|133|185|2224|2246|3293|4597|5629|6469|29842	ABCA1|ADM|AGTR1|FDPS|FGF1|HSD17B3|MVD|PROX1|SHH|TFCP2L1	-0.491623	0	34	0	0	-2.54565	4.67396
1	-2.33921	GO:0045940	M1	1	0	GO Biological Processes	19	positive regulation of steroid metabolic process	-2.33921	8.88051	4.6091	24155	30	272	3	1.10294	0.633262	133|185|2246	ADM|AGTR1|FGF1	-0.489184	0	4	0	0	-5.70577	8.88051
1	-2.33357	GO:0008585	M1	1	0	GO Biological Processes	19	female gonad development	-2.33357	4.62527	3.79814	24155	96	272	5	1.83824	0.814493	116|3383|3623|4323|56956	ADCYAP1|ICAM1|INHA|MMP14|LHX9	-0.489184	0	6	0	0	-5.03726	6.45856
1	-2.33921	GO:0044818	M1	1	0	GO Biological Processes	19	mitotic G2/M transition checkpoint	-2.33921	8.88051	4.6091	24155	30	272	3	1.10294	0.633262	990|4998|63967	CDC6|ORC1|CLSPN	-0.489184	0	9	0	0	-4.77963	26.6415
1	-2.32993	GO:0051306	M1	1	0	GO Biological Processes	19	mitotic sister chromatid separation	-2.32993	5.92034	4.07232	24155	60	272	4	1.47059	0.729868	990|9212|9319|57520	CDC6|AURKB|TRIP13|HECW2	-0.489184	0	19	0	0	-3.53957	6.96511
1	-2.3312	GO:0042692	M1	1	0	GO Biological Processes	19	muscle cell differentiation	-2.3312	2.52418	3.22574	24155	387	272	11	4.04412	1.19444	133|577|4323|4629|4703|5629|6469|25802|28514|84466|84665	ADM|ADGRB3|MMP14|MYH11|NEB|PROX1|SHH|LMOD1|DLL1|MEGF10|MYPN	-0.489184	0	28	0	0	-2.8525	6.08254
1	-2.33357	GO:1990823	M1	1	0	GO Biological Processes	19	response to leukemia inhibitory factor	-2.33357	4.62527	3.79814	24155	96	272	5	1.83824	0.814493	3383|4605|9242|11240|80258	ICAM1|MYBL2|MSC|PADI2|EFHC2	-0.489184	0	39	1	1	-2.33357	4.62527
1	-2.33357	GO:1990830	M1	1	0	GO Biological Processes	19	cellular response to leukemia inhibitory factor	-2.33357	4.62527	3.79814	24155	96	272	5	1.83824	0.814493	3383|4605|9242|11240|80258	ICAM1|MYBL2|MSC|PADI2|EFHC2	-0.489184	0	39	0	0	-2.33357	4.62527
1	-2.31452	GO:0010771	M1	1	0	GO Biological Processes	19	negative regulation of cell morphogenesis involved in differentiation	-2.31452	4.57758	3.76774	24155	97	272	5	1.83824	0.814493	4804|7869|8829|223117|374946	NGFR|SEMA3B|NRP1|SEMA3D|DRAXIN	-0.480631	0	10	0	0	-4.71506	10.2467
1	-2.31385	GO:0000904	M1	1	0	GO Biological Processes	19	cell morphogenesis involved in differentiation	-2.31385	2.02643	3.03696	24155	745	272	17	6.25	1.46771	577|1749|2042|2736|3037|4804|5629|6469|7869|8829|11141|56956|57520|84665|128434|223117|374946	ADGRB3|DLX5|EPHA3|GLI2|HAS2|NGFR|PROX1|SHH|SEMA3B|NRP1|IL1RAPL1|LHX9|HECW2|MYPN|VSTM2L|SEMA3D|DRAXIN	-0.480631	0	10	0	0	-4.71506	10.2467
1	-2.31472	GO:0032970	M1	1	0	GO Biological Processes	19	regulation of actin filament-based process	-2.31472	2.5112	3.20666	24155	389	272	11	4.04412	1.19444	1490|2042|3383|4703|4771|5629|7454|8829|11346|25802|58480	CCN2|EPHA3|ICAM1|NEB|NF2|PROX1|WAS|NRP1|SYNPO|LMOD1|RHOU	-0.480631	0	15	0	0	-4.12286	5.82329
1	-2.31452	GO:0032231	M1	1	0	GO Biological Processes	19	regulation of actin filament bundle assembly	-2.31452	4.57758	3.76774	24155	97	272	5	1.83824	0.814493	1490|4771|7454|8829|11346	CCN2|NF2|WAS|NRP1|SYNPO	-0.480631	0	15	0	0	-4.12286	5.82329
1	-2.30979	GO:0060070	M1	1	0	GO Biological Processes	19	canonical Wnt signaling pathway	-2.30979	2.6509	3.24718	24155	335	272	10	3.67647	1.14103	1749|6469|6657|6659|6932|7477|8313|25937|340419|374946	DLX5|SHH|SOX2|SOX4|TCF7|WNT7B|AXIN2|WWTR1|RSPO2|DRAXIN	-0.478923	0	3	0	0	-7.21601	38.0593
1	-2.30843	GO:0007389	M1	1	0	GO Biological Processes	19	pattern specification process	-2.30843	2.38938	3.16057	24155	446	272	12	4.41176	1.24516	2246|2736|5100|6469|7477|7516|8313|8829|28514|55502|64399|220136	FGF1|GLI2|PCDH8|SHH|WNT7B|XRCC2|AXIN2|NRP1|DLL1|HES6|HHIP|CFAP53	-0.478923	0	31	0	0	-2.65146	5.07458
1	-2.30426	GO:0048645	M1	1	0	GO Biological Processes	19	animal organ formation	-2.30426	5.82329	4.02521	24155	61	272	4	1.47059	0.729868	2246|2736|6469|8313	FGF1|GLI2|SHH|AXIN2	-0.478599	0	3	0	0	-7.21601	38.0593
1	-2.3026	GO:1903670	M1	1	0	GO Biological Processes	19	regulation of sprouting angiogenesis	-2.3026	3.83332	3.57509	24155	139	272	6	2.20588	0.89056	185|2246|4804|8829|27286|28514	AGTR1|FGF1|NGFR|NRP1|SRPX2|DLL1	-0.478599	0	4	0	0	-5.70577	8.88051
1	-2.30426	GO:0032233	M1	1	0	GO Biological Processes	19	positive regulation of actin filament bundle assembly	-2.30426	5.82329	4.02521	24155	61	272	4	1.47059	0.729868	1490|4771|8829|11346	CCN2|NF2|NRP1|SYNPO	-0.478599	0	15	0	0	-4.12286	5.82329
1	-2.29407	GO:1905114	M1	1	0	GO Biological Processes	19	cell surface receptor signaling pathway involved in cell-cell signaling	-2.29407	2.13132	3.05809	24155	625	272	15	5.51471	1.38407	1363|1749|2736|2898|6469|6657|6659|6932|7477|8313|9127|22999|25937|340419|374946	CPE|DLX5|GLI2|GRIK2|SHH|SOX2|SOX4|TCF7|WNT7B|AXIN2|P2RX6|RIMS1|WWTR1|RSPO2|DRAXIN	-0.472958	0	3	0	0	-7.21601	38.0593
1	-2.29152	GO:0021953	M1	1	0	GO Biological Processes	19	central nervous system neuron differentiation	-2.29152	3.36019	3.43902	24155	185	272	7	2.57353	0.960105	1749|2736|5629|6469|6659|8829|374946	DLX5|GLI2|PROX1|SHH|SOX4|NRP1|DRAXIN	-0.472958	0	3	0	0	-7.21601	38.0593
1	-2.29152	GO:0007369	M1	1	0	GO Biological Processes	19	gastrulation	-2.29152	3.36019	3.43902	24155	185	272	7	2.57353	0.960105	1295|3909|4313|4323|4771|6657|8862	COL8A1|LAMA3|MMP2|MMP14|NF2|SOX2|APLN	-0.472958	0	17	0	0	-3.83113	9.86724
1	-2.28759	GO:0072073	M1	1	0	GO Biological Processes	19	kidney epithelium development	-2.28759	3.80593	3.55332	24155	140	272	6	2.20588	0.89056	2246|6469|7477|25937|28514|55083	FGF1|SHH|WNT7B|WWTR1|DLL1|KIF26B	-0.470829	0	2	0	0	-7.67617	8.32548
1	-2.27909	GO:1905818	M1	1	0	GO Biological Processes	19	regulation of chromosome separation	-2.27909	5.72936	3.97913	24155	62	272	4	1.47059	0.729868	990|9212|9319|57520	CDC6|AURKB|TRIP13|HECW2	-0.465753	0	19	0	0	-3.53957	6.96511
1	-2.27894	GO:0055001	M1	1	0	GO Biological Processes	19	muscle cell development	-2.27894	3.34213	3.42198	24155	186	272	7	2.57353	0.960105	133|4629|4703|5629|25802|84466|84665	ADM|MYH11|NEB|PROX1|LMOD1|MEGF10|MYPN	-0.465753	0	28	0	0	-2.8525	6.08254
1	-2.27711	GO:0001708	M1	1	0	GO Biological Processes	19	cell fate specification	-2.27711	4.48511	3.70815	24155	99	272	5	1.83824	0.814493	2736|6469|6657|8829|28514	GLI2|SHH|SOX2|NRP1|DLL1	-0.465703	0	3	0	0	-7.21601	38.0593
1	-2.25943	GO:0003338	M1	1	0	GO Biological Processes	19	metanephros morphogenesis	-2.25943	8.32548	4.42517	24155	32	272	3	1.10294	0.633262	7477|55083|80144	WNT7B|KIF26B|FRAS1	-0.45713	0	2	0	0	-7.67617	8.32548
1	-2.25943	GO:0048841	M1	1	0	GO Biological Processes	19	regulation of axon extension involved in axon guidance	-2.25943	8.32548	4.42517	24155	32	272	3	1.10294	0.633262	7869|8829|223117	SEMA3B|NRP1|SEMA3D	-0.45713	0	10	0	0	-4.71506	10.2467
1	-2.25803	GO:0040013	M1	1	0	GO Biological Processes	19	negative regulation of locomotion	-2.25803	2.46681	3.14081	24155	396	272	11	4.04412	1.19444	972|4771|5592|6469|7454|7869|8829|10221|11240|50859|223117	CD74|NF2|PRKG1|SHH|WAS|SEMA3B|NRP1|TRIB1|PADI2|SPOCK3|SEMA3D	-0.45713	0	10	0	0	-4.71506	10.2467
1	-2.25943	GO:0060325	M1	1	0	GO Biological Processes	19	face morphogenesis	-2.25943	8.32548	4.42517	24155	32	272	3	1.10294	0.633262	1749|4313|64220	DLX5|MMP2|STRA6	-0.45713	0	23	0	0	-3.23564	17.761
1	-2.25876	GO:0035282	M1	1	0	GO Biological Processes	19	segmentation	-2.25876	4.44026	3.67894	24155	100	272	5	1.83824	0.814493	5100|7516|8313|8829|28514	PCDH8|XRCC2|AXIN2|NRP1|DLL1	-0.45713	0	31	0	0	-2.65146	5.07458
1	-2.25943	GO:0001569	M1	1	0	GO Biological Processes	19	branching involved in blood vessel morphogenesis	-2.25943	8.32548	4.42517	24155	32	272	3	1.10294	0.633262	1909|6469|8829	EDNRA|SHH|NRP1	-0.45713	0	40	1	1	-2.25943	8.32548
1	-2.25405	GO:0031345	M1	1	0	GO Biological Processes	19	negative regulation of cell projection organization	-2.25405	3.30657	3.38824	24155	188	272	7	2.57353	0.960105	4804|7025|7869|8829|146760|223117|374946	NGFR|NR2F1|SEMA3B|NRP1|RTN4RL1|SEMA3D|DRAXIN	-0.454876	0	10	0	0	-4.71506	10.2467
1	-2.24063	GO:0046545	M1	1	0	GO Biological Processes	19	development of primary female sexual characteristics	-2.24063	4.39629	3.65012	24155	101	272	5	1.83824	0.814493	116|3383|3623|4323|56956	ADCYAP1|ICAM1|INHA|MMP14|LHX9	-0.443175	0	6	0	0	-5.03726	6.45856
1	-2.23651	GO:0061564	M1	1	0	GO Biological Processes	19	axon development	-2.23651	2.24604	3.04731	24155	514	272	13	4.77941	1.29351	1749|2042|2736|4804|6469|7869|8829|56956|84665|128434|146760|223117|374946	DLX5|EPHA3|GLI2|NGFR|SHH|SEMA3B|NRP1|LHX9|MYPN|VSTM2L|RTN4RL1|SEMA3D|DRAXIN	-0.440771	0	10	0	0	-4.71506	10.2467
1	-2.22987	GO:0048705	M1	1	0	GO Biological Processes	19	skeletal system morphogenesis	-2.22987	2.97256	3.27054	24155	239	272	8	2.94118	1.02446	1490|1749|3037|4313|4323|8313|64399|144347	CCN2|DLX5|HAS2|MMP2|MMP14|AXIN2|HHIP|RFLNA	-0.439227	0	5	0	0	-5.12856	8.53896
1	-2.23016	GO:0050922	M1	1	0	GO Biological Processes	19	negative regulation of chemotaxis	-2.23016	5.55032	3.88991	24155	64	272	4	1.47059	0.729868	7869|8829|11240|223117	SEMA3B|NRP1|PADI2|SEMA3D	-0.439227	0	10	0	0	-4.71506	10.2467
1	-2.23093	GO:0001101	M1	1	0	GO Biological Processes	19	response to acid chemical	-2.23093	2.58154	3.15287	24155	344	272	10	3.67647	1.14103	19|440|1490|2042|3383|4277|4313|5737|7298|7477	ABCA1|ASNS|CCN2|EPHA3|ICAM1|MICB|MMP2|PTGFR|TYMS|WNT7B	-0.439227	0	41	1	1	-2.23093	2.58154
1	-2.22272	GO:0021549	M1	1	0	GO Biological Processes	19	cerebellum development	-2.22272	4.35319	3.62167	24155	102	272	5	1.83824	0.814493	2736|5270|5629|28514|93986	GLI2|SERPINE2|PROX1|DLL1|FOXP2	-0.434347	0	13	0	0	-4.32056	38.0593
1	-2.22162	GO:0016486	M1	1	0	GO Biological Processes	19	peptide hormone processing	-2.22162	8.0732	4.33911	24155	33	272	3	1.10294	0.633262	1363|1636|2028	CPE|ACE|ENPEP	-0.434347	0	20	0	0	-3.46569	11.8407
1	-2.21457	GO:0007612	M1	1	0	GO Biological Processes	19	learning	-2.21457	3.6747	3.44744	24155	145	272	6	2.20588	0.89056	577|11346|23657|57144|64220|93986	ADGRB3|SYNPO|SLC7A11|PAK5|STRA6|FOXP2	-0.428963	0	42	1	1	-2.21457	3.6747
1	-2.20533	GO:0048839	M1	1	0	GO Biological Processes	19	inner ear development	-2.20533	3.23769	3.32211	24155	192	272	7	2.57353	0.960105	1749|2736|3777|5629|6469|6657|28514	DLX5|GLI2|KCNK3|PROX1|SHH|SOX2|DLL1	-0.421391	0	3	0	0	-7.21601	38.0593
1	-2.20035	GO:1902107	M1	1	0	GO Biological Processes	19	positive regulation of leukocyte differentiation	-2.20035	3.64953	3.42683	24155	146	272	6	2.20588	0.89056	972|2736|3592|4323|6469|10221	CD74|GLI2|IL12A|MMP14|SHH|TRIB1	-0.418075	0	8	0	0	-4.85917	4.72368
1	-2.19035	GO:0045786	M1	1	0	GO Biological Processes	19	negative regulation of cell cycle	-2.19035	2.07489	2.94585	24155	642	272	15	5.51471	1.38407	116|990|3592|3623|4998|5629|6241|6657|6659|8318|9212|9319|29933|63967|220042	ADCYAP1|CDC6|IL12A|INHA|ORC1|PROX1|RRM2|SOX2|SOX4|CDC45|AURKB|TRIP13|GPR132|CLSPN|DDIAS	-0.409732	0	9	0	0	-4.77963	26.6415
1	-2.18781	GO:0051146	M1	1	0	GO Biological Processes	19	striated muscle cell differentiation	-2.18781	2.70931	3.15233	24155	295	272	9	3.30882	1.08454	577|4323|4629|4703|5629|6469|25802|28514|84665	ADGRB3|MMP14|MYH11|NEB|PROX1|SHH|LMOD1|DLL1|MYPN	-0.408836	0	28	0	0	-2.8525	6.08254
1	-2.18509	GO:0021522	M1	1	0	GO Biological Processes	19	spinal cord motor neuron differentiation	-2.18509	7.83575	4.2566	24155	34	272	3	1.10294	0.633262	2736|6469|6659	GLI2|SHH|SOX4	-0.407759	0	3	0	0	-7.21601	38.0593
1	-2.17997	GO:0007268	M1	1	0	GO Biological Processes	19	chemical synaptic transmission	-2.17997	2.01258	2.9141	24155	706	272	16	5.88235	1.42668	116|2898|3777|5100|5270|6855|8913|9127|9495|11346|22999|23467|23657|56125|64101|84073	ADCYAP1|GRIK2|KCNK3|PCDH8|SERPINE2|SYP|CACNA1G|P2RX6|AKAP5|SYNPO|RIMS1|NPTXR|SLC7A11|PCDHB11|LRRC4|MYCBPAP	-0.405904	0	27	0	0	-2.88375	2.23879
1	-2.17997	GO:0098916	M1	1	0	GO Biological Processes	19	anterograde trans-synaptic signaling	-2.17997	2.01258	2.9141	24155	706	272	16	5.88235	1.42668	116|2898|3777|5100|5270|6855|8913|9127|9495|11346|22999|23467|23657|56125|64101|84073	ADCYAP1|GRIK2|KCNK3|PCDH8|SERPINE2|SYP|CACNA1G|P2RX6|AKAP5|SYNPO|RIMS1|NPTXR|SLC7A11|PCDHB11|LRRC4|MYCBPAP	-0.405904	0	27	0	0	-2.88375	2.23879
1	-2.1723	GO:0035107	M1	1	0	GO Biological Processes	19	appendage morphogenesis	-2.1723	3.60021	3.38614	24155	148	272	6	2.20588	0.89056	1749|2736|6469|6659|80144|340419	DLX5|GLI2|SHH|SOX4|FRAS1|RSPO2	-0.403083	0	3	0	0	-7.21601	38.0593
1	-2.1723	GO:0035108	M1	1	0	GO Biological Processes	19	limb morphogenesis	-2.1723	3.60021	3.38614	24155	148	272	6	2.20588	0.89056	1749|2736|6469|6659|80144|340419	DLX5|GLI2|SHH|SOX4|FRAS1|RSPO2	-0.403083	0	3	0	0	-7.21601	38.0593
1	-2.1723	GO:0061351	M1	1	0	GO Biological Processes	19	neural precursor cell proliferation	-2.1723	3.60021	3.38614	24155	148	272	6	2.20588	0.89056	116|4771|5629|6469|6660|64399	ADCYAP1|NF2|PROX1|SHH|SOX5|HHIP	-0.403083	0	32	0	0	-2.61678	5.04575
1	-2.17028	GO:1902750	M1	1	0	GO Biological Processes	19	negative regulation of cell cycle G2/M phase transition	-2.17028	4.22882	3.53847	24155	105	272	5	1.83824	0.814493	990|4998|9212|29933|63967	CDC6|ORC1|AURKB|GPR132|CLSPN	-0.40267	0	9	0	0	-4.77963	26.6415
1	-2.16005	GO:0048662	M1	1	0	GO Biological Processes	19	negative regulation of smooth muscle cell proliferation	-2.16005	5.3018	3.76289	24155	67	272	4	1.47059	0.729868	3592|5592|8862|10221	IL12A|PRKG1|APLN|TRIB1	-0.394038	0	25	0	0	-2.93367	5.3018
1	-2.15673	GO:0060537	M1	1	0	GO Biological Processes	19	muscle tissue development	-2.15673	2.3884	3.02215	24155	409	272	11	4.04412	1.19444	4629|4703|5629|6469|9242|28514|51676|64220|84466|93986|129446	MYH11|NEB|PROX1|SHH|MSC|DLL1|ASB2|STRA6|MEGF10|FOXP2|XIRP2	-0.393903	0	14	0	0	-4.17977	17.761
1	-2.15795	GO:0006694	M1	1	0	GO Biological Processes	19	steroid biosynthetic process	-2.15795	3.17161	3.2577	24155	196	272	7	2.57353	0.960105	133|2224|2246|3293|4597|5629|29842	ADM|FDPS|FGF1|HSD17B3|MVD|PROX1|TFCP2L1	-0.393903	0	34	0	0	-2.54565	4.67396
1	-2.14794	GO:0007409	M1	1	0	GO Biological Processes	19	axonogenesis	-2.14794	2.27706	2.97723	24155	468	272	12	4.41176	1.24516	1749|2042|2736|4804|6469|7869|8829|56956|84665|128434|223117|374946	DLX5|EPHA3|GLI2|NGFR|SHH|SEMA3B|NRP1|LHX9|MYPN|VSTM2L|SEMA3D|DRAXIN	-0.386693	0	10	0	0	-4.71506	10.2467
1	-2.14473	GO:0016331	M1	1	0	GO Biological Processes	19	morphogenesis of embryonic epithelium	-2.14473	3.55221	3.34615	24155	150	272	6	2.20588	0.89056	133|2736|5100|6469|6659|7477	ADM|GLI2|PCDH8|SHH|SOX4|WNT7B	-0.386633	0	3	0	0	-7.21601	38.0593
1	-2.14473	GO:0008277	M1	1	0	GO Biological Processes	19	regulation of G protein-coupled receptor signaling pathway	-2.14473	3.55221	3.34615	24155	150	272	6	2.20588	0.89056	116|133|2788|6855|8862|11343	ADCYAP1|ADM|GNG7|SYP|APLN|MGLL	-0.386633	0	11	0	0	-4.62071	8.17942
1	-2.1375	GO:0033047	M1	1	0	GO Biological Processes	19	regulation of mitotic sister chromatid segregation	-2.1375	5.22383	3.72224	24155	68	272	4	1.47059	0.729868	990|9212|9319|57520	CDC6|AURKB|TRIP13|HECW2	-0.384082	0	19	0	0	-3.53957	6.96511
1	-2.1375	GO:0051965	M1	1	0	GO Biological Processes	19	positive regulation of synapse assembly	-2.1375	5.22383	3.72224	24155	68	272	4	1.47059	0.729868	577|3556|11141|27286	ADGRB3|IL1RAP|IL1RAPL1|SRPX2	-0.384082	0	26	0	0	-2.92678	10.2467
1	-2.1375	GO:0003341	M1	1	0	GO Biological Processes	19	cilium movement	-2.1375	5.22383	3.72224	24155	68	272	4	1.47059	0.729868	56171|79819|80217|220136	DNAH7|WDR78|CFAP43|CFAP53	-0.384082	0	43	1	1	-2.1375	5.22383
1	-2.13303	GO:0010769	M1	1	0	GO Biological Processes	19	regulation of cell morphogenesis involved in differentiation	-2.13303	2.6553	3.084	24155	301	272	9	3.30882	1.08454	577|3037|4804|7869|8829|11141|57520|223117|374946	ADGRB3|HAS2|NGFR|SEMA3B|NRP1|IL1RAPL1|HECW2|SEMA3D|DRAXIN	-0.381155	0	10	0	0	-4.71506	10.2467
1	-2.13046	GO:0031589	M1	1	0	GO Biological Processes	19	cell-substrate adhesion	-2.13046	2.49453	3.03168	24155	356	272	10	3.67647	1.14103	1295|1490|2042|3037|3696|4323|4771|7450|8829|25992	COL8A1|CCN2|EPHA3|HAS2|ITGB8|MMP14|NF2|VWF|NRP1|SNED1	-0.380132	0	18	0	0	-3.69647	9.25054
1	-2.11967	GO:0002456	M1	1	0	GO Biological Processes	19	T cell mediated immunity	-2.11967	4.11135	3.45832	24155	108	272	5	1.83824	0.814493	3383|3592|4277|7133|7454	ICAM1|IL12A|MICB|TNFRSF1B|WAS	-0.370875	0	44	1	1	-2.11967	4.11135
1	-2.11764	GO:0030902	M1	1	0	GO Biological Processes	19	hindbrain development	-2.11764	3.50547	3.30683	24155	152	272	6	2.20588	0.89056	2736|5270|5629|6469|28514|93986	GLI2|SERPINE2|PROX1|SHH|DLL1|FOXP2	-0.370381	0	13	0	0	-4.32056	38.0593
1	-2.09357	GO:0001756	M1	1	0	GO Biological Processes	19	somitogenesis	-2.09357	5.07458	3.64328	24155	70	272	4	1.47059	0.729868	5100|7516|8313|28514	PCDH8|XRCC2|AXIN2|DLL1	-0.347842	0	31	0	0	-2.65146	5.07458
1	-2.0824	GO:0071542	M1	1	0	GO Biological Processes	19	dopaminergic neuron differentiation	-2.0824	7.20042	4.02796	24155	37	272	3	1.10294	0.633262	6469|340419|441549	SHH|RSPO2|CDNF	-0.347204	0	3	0	0	-7.21601	38.0593
1	-2.09101	GO:0006261	M1	1	0	GO Biological Processes	19	DNA-dependent DNA replication	-2.09101	3.45994	3.26817	24155	154	272	6	2.20588	0.89056	990|4998|8318|9401|51659|55388	CDC6|ORC1|CDC45|RECQL4|GINS2|MCM10	-0.347204	0	9	0	0	-4.77963	26.6415
1	-2.0824	GO:0048846	M1	1	0	GO Biological Processes	19	axon extension involved in axon guidance	-2.0824	7.20042	4.02796	24155	37	272	3	1.10294	0.633262	7869|8829|223117	SEMA3B|NRP1|SEMA3D	-0.347204	0	10	0	0	-4.71506	10.2467
1	-2.0824	GO:1902284	M1	1	0	GO Biological Processes	19	neuron projection extension involved in neuron projection guidance	-2.0824	7.20042	4.02796	24155	37	272	3	1.10294	0.633262	7869|8829|223117	SEMA3B|NRP1|SEMA3D	-0.347204	0	10	0	0	-4.71506	10.2467
1	-2.08697	GO:0021537	M1	1	0	GO Biological Processes	19	telencephalon development	-2.08697	2.80807	3.08526	24155	253	272	8	2.94118	1.02446	1749|4771|5629|6469|8829|23657|93986|146760	DLX5|NF2|PROX1|SHH|NRP1|SLC7A11|FOXP2|RTN4RL1	-0.347204	0	12	0	0	-4.57682	11.4587
1	-2.0824	GO:0060323	M1	1	0	GO Biological Processes	19	head morphogenesis	-2.0824	7.20042	4.02796	24155	37	272	3	1.10294	0.633262	1749|4313|64220	DLX5|MMP2|STRA6	-0.347204	0	23	0	0	-3.23564	17.761
1	-2.0824	GO:0007431	M1	1	0	GO Biological Processes	19	salivary gland development	-2.0824	7.20042	4.02796	24155	37	272	3	1.10294	0.633262	6469|8829|29842	SHH|NRP1|TFCP2L1	-0.347204	0	40	0	0	-2.25943	8.32548
1	-2.07078	GO:0022037	M1	1	0	GO Biological Processes	19	metencephalon development	-2.07078	4.00023	3.38102	24155	111	272	5	1.83824	0.814493	2736|5270|5629|28514|93986	GLI2|SERPINE2|PROX1|DLL1|FOXP2	-0.337075	0	13	0	0	-4.32056	38.0593
1	-2.06703	GO:0045766	M1	1	0	GO Biological Processes	19	positive regulation of angiogenesis	-2.06703	3.04724	3.13369	24155	204	272	7	2.57353	0.960105	133|185|2246|3696|8829|27286|28514	ADM|AGTR1|FGF1|ITGB8|NRP1|SRPX2|DLL1	-0.334803	0	4	0	0	-5.70577	8.88051
1	-2.06484	GO:0051017	M1	1	0	GO Biological Processes	19	actin filament bundle assembly	-2.06484	3.41558	3.23015	24155	156	272	6	2.20588	0.89056	1490|4771|7454|8829|11346|339768	CCN2|NF2|WAS|NRP1|SYNPO|ESPNL	-0.33408	0	15	0	0	-4.12286	5.82329
1	-2.03859	GO:0022604	M1	1	0	GO Biological Processes	19	regulation of cell morphogenesis	-2.03859	2.20178	2.85019	24155	484	272	12	4.41176	1.24516	577|3037|3383|4804|7869|8829|11141|22999|57520|58480|223117|374946	ADGRB3|HAS2|ICAM1|NGFR|SEMA3B|NRP1|IL1RAPL1|RIMS1|HECW2|RHOU|SEMA3D|DRAXIN	-0.309303	0	10	0	0	-4.71506	10.2467
1	-2.03043	GO:1903524	M1	1	0	GO Biological Processes	19	positive regulation of blood circulation	-2.03043	4.86604	3.53033	24155	73	272	4	1.47059	0.729868	133|1490|3383|8862	ADM|CCN2|ICAM1|APLN	-0.302605	0	11	0	0	-4.62071	8.17942
1	-2.02339	GO:1901215	M1	1	0	GO Biological Processes	19	negative regulation of neuron death	-2.02339	2.98863	3.07394	24155	208	272	7	2.57353	0.960105	2898|7133|7516|8829|23657|128434|374946	GRIK2|TNFRSF1B|XRCC2|NRP1|SLC7A11|VSTM2L|DRAXIN	-0.297026	0	45	1	1	-2.02339	2.98863
1	-2.01954	GO:0032535	M1	1	0	GO Biological Processes	19	regulation of cellular component size	-2.01954	2.40014	2.89638	24155	370	272	10	3.67647	1.14103	3383|4703|7454|7477|7869|8829|25802|64798|223117|374946	ICAM1|NEB|WAS|WNT7B|SEMA3B|NRP1|LMOD1|DEPTOR|SEMA3D|DRAXIN	-0.294631	0	10	0	0	-4.71506	10.2467
1	-2.01379	GO:0021915	M1	1	0	GO Biological Processes	19	neural tube development	-2.01379	3.33019	3.15592	24155	160	272	6	2.20588	0.89056	133|2736|5629|6469|6659|6932	ADM|GLI2|PROX1|SHH|SOX4|TCF7	-0.291776	0	3	0	0	-7.21601	38.0593
1	-2.01379	GO:0007519	M1	1	0	GO Biological Processes	19	skeletal muscle tissue development	-2.01379	3.33019	3.15592	24155	160	272	6	2.20588	0.89056	6469|9242|28514|51676|84466|93986	SHH|MSC|DLL1|ASB2|MEGF10|FOXP2	-0.291776	0	14	0	0	-4.17977	17.761
1	-2.00814	GO:0010927	M1	1	0	GO Biological Processes	19	cellular component assembly involved in morphogenesis	-2.00814	3.86109	3.28207	24155	115	272	5	1.83824	0.814493	4629|4703|5629|25802|84665	MYH11|NEB|PROX1|LMOD1|MYPN	-0.287568	0	28	0	0	-2.8525	6.08254

## Sheet: YAP-regulated genes
_MEMBER_Input ID	_LogP_Input ID	GO	_PATTERN_	_RANK_	GiniIndex	Category	CategoryID	Description	LogP	Enrichment	Z-score	#TotalGeneInLibrary	#GeneInGO	#GeneInHitList	#GeneInGOAndHitList	%InGO	STDV %InGO	GeneID	Hits	Log(q-value)	EvidenceCutoff	GROUP_ID	FirstInGroupByEnrichment	FirstInGroupByLogP	BestLogPInGroup	BestEnrichmentInGroup	URL
1	-13.8149	GO:0007059	M1	1	0	GO Biological Processes	19	chromosome segregation	-13.8149	9.20942	12.5246	24155	324	170	21	12.3529	2.52365	332|699|891|991|1062|1063|4288|4751|5347|9055|9493|9700|9787|10051|10615|11004|24137|55143|55355|81610|387103	BIRC5|BUB1|CCNB1|CDC20|CENPE|CENPF|MKI67|NEK2|PLK1|PRC1|KIF23|ESPL1|DLGAP5|SMC4|SPAG5|KIF2C|KIF4A|CDCA8|HJURP|FAM83D|CENPW	-9.88759	0	1	1	1	-13.8149	22.2884
1	-13.7871	GO:0000070	M1	1	0	GO Biological Processes	19	mitotic sister chromatid segregation	-13.7871	14.7624	14.4241	24155	154	170	16	9.41176	2.23948	699|891|991|1062|1063|4751|5347|9055|9493|9700|9787|10051|10615|11004|24137|55143	BUB1|CCNB1|CDC20|CENPE|CENPF|NEK2|PLK1|PRC1|KIF23|ESPL1|DLGAP5|SMC4|SPAG5|KIF2C|KIF4A|CDCA8	-9.88759	0	1	0	0	-13.8149	22.2884
1	-13.2299	GO:0140014	M1	1	0	GO Biological Processes	19	mitotic nuclear division	-13.2299	10.0734	12.575	24155	268	170	19	11.1765	2.41653	332|699|891|991|1062|1063|4288|4751|5347|9055|9493|9700|9787|10051|10615|11004|24137|55143|440145	BIRC5|BUB1|CCNB1|CDC20|CENPE|CENPF|MKI67|NEK2|PLK1|PRC1|KIF23|ESPL1|DLGAP5|SMC4|SPAG5|KIF2C|KIF4A|CDCA8|MZT1	-9.50647	0	1	0	0	-13.8149	22.2884
1	-12.9314	GO:0051301	M1	1	0	GO Biological Processes	19	cell division	-12.9314	6.17775	10.794	24155	598	170	26	15.2941	2.76054	332|699|890|891|991|1058|1062|1063|4751|5347|9055|9493|9700|10051|10112|10615|11004|11113|24137|54478|55143|81610|83461|219736|259266|387103	BIRC5|BUB1|CCNA2|CCNB1|CDC20|CENPA|CENPE|CENPF|NEK2|PLK1|PRC1|KIF23|ESPL1|SMC4|KIF20A|SPAG5|KIF2C|CIT|KIF4A|PIMREG|CDCA8|FAM83D|CDCA3|STOX1|ASPM|CENPW	-9.3329	0	1	0	0	-13.8149	22.2884
1	-12.283	GO:0000819	M1	1	0	GO Biological Processes	19	sister chromatid segregation	-12.283	11.8407	12.6966	24155	192	170	16	9.41176	2.23948	699|891|991|1062|1063|4751|5347|9055|9493|9700|9787|10051|10615|11004|24137|55143	BUB1|CCNB1|CDC20|CENPE|CENPF|NEK2|PLK1|PRC1|KIF23|ESPL1|DLGAP5|SMC4|SPAG5|KIF2C|KIF4A|CDCA8	-8.78138	0	1	0	0	-13.8149	22.2884
1	-11.1821	GO:0098813	M1	1	0	GO Biological Processes	19	nuclear chromosome segregation	-11.1821	9.11509	11.183	24155	265	170	17	10	2.30089	699|891|991|1062|1063|4751|5347|9055|9493|9700|9787|10051|10615|11004|24137|55143|81610	BUB1|CCNB1|CDC20|CENPE|CENPF|NEK2|PLK1|PRC1|KIF23|ESPL1|DLGAP5|SMC4|SPAG5|KIF2C|KIF4A|CDCA8|FAM83D	-7.75969	0	1	0	0	-13.8149	22.2884
1	-11.0571	GO:0051983	M1	1	0	GO Biological Processes	19	regulation of chromosome segregation	-11.0571	16.554	13.3178	24155	103	170	12	7.05882	1.96447	699|891|991|1062|1063|4288|4751|5347|9700|9787|10615|11004	BUB1|CCNB1|CDC20|CENPE|CENPF|MKI67|NEK2|PLK1|ESPL1|DLGAP5|SPAG5|KIF2C	-7.70161	0	1	0	0	-13.8149	22.2884
1	-10.8792	GO:0000280	M1	1	0	GO Biological Processes	19	nuclear division	-10.8792	6.91427	10.1811	24155	411	170	20	11.7647	2.47108	332|699|891|991|1062|1063|4288|4751|5347|9055|9493|9700|9787|10051|10615|11004|24137|55143|259266|440145	BIRC5|BUB1|CCNB1|CDC20|CENPE|CENPF|MKI67|NEK2|PLK1|PRC1|KIF23|ESPL1|DLGAP5|SMC4|SPAG5|KIF2C|KIF4A|CDCA8|ASPM|MZT1	-7.5817	0	1	0	0	-13.8149	22.2884
1	-10.1792	GO:0007051	M1	1	0	GO Biological Processes	19	spindle organization	-10.1792	10.6376	11.1384	24155	187	170	14	8.23529	2.1084	332|891|991|1062|4751|5347|9055|9493|9700|10615|24137|259266|387103|440145	BIRC5|CCNB1|CDC20|CENPE|NEK2|PLK1|PRC1|KIF23|ESPL1|SPAG5|KIF4A|ASPM|CENPW|MZT1	-6.9329	0	1	0	0	-13.8149	22.2884
1	-10.1242	GO:0048285	M1	1	0	GO Biological Processes	19	organelle fission	-10.1242	6.27321	9.53852	24155	453	170	20	11.7647	2.47108	332|699|891|991|1062|1063|4288|4751|5347|9055|9493|9700|9787|10051|10615|11004|24137|55143|259266|440145	BIRC5|BUB1|CCNB1|CDC20|CENPE|CENPF|MKI67|NEK2|PLK1|PRC1|KIF23|ESPL1|DLGAP5|SMC4|SPAG5|KIF2C|KIF4A|CDCA8|ASPM|MZT1	-6.92366	0	1	0	0	-13.8149	22.2884
1	-9.6985	GO:1902850	M1	1	0	GO Biological Processes	19	microtubule cytoskeleton organization involved in mitosis	-9.6985	12.7243	11.4576	24155	134	170	12	7.05882	1.96447	332|891|991|1058|1062|4751|5347|9055|9493|9700|24137|440145	BIRC5|CCNB1|CDC20|CENPA|CENPE|NEK2|PLK1|PRC1|KIF23|ESPL1|KIF4A|MZT1	-6.53931	0	1	0	0	-13.8149	22.2884
1	-8.6002	GO:0030071	M1	1	0	GO Biological Processes	19	regulation of mitotic metaphase/anaphase transition	-8.6002	22.2884	12.8124	24155	51	170	8	4.70588	1.62416	699|891|991|1062|1063|5347|9700|9787	BUB1|CCNB1|CDC20|CENPE|CENPF|PLK1|ESPL1|DLGAP5	-5.4788	0	1	0	0	-13.8149	22.2884
1	-8.46177	GO:1902099	M1	1	0	GO Biological Processes	19	regulation of metaphase/anaphase transition of cell cycle	-8.46177	21.4473	12.5457	24155	53	170	8	4.70588	1.62416	699|891|991|1062|1063|5347|9700|9787	BUB1|CCNB1|CDC20|CENPE|CENPF|PLK1|ESPL1|DLGAP5	-5.37514	0	1	0	0	-13.8149	22.2884
1	-8.39473	GO:0007091	M1	1	0	GO Biological Processes	19	metaphase/anaphase transition of mitotic cell cycle	-8.39473	21.0501	12.4178	24155	54	170	8	4.70588	1.62416	699|891|991|1062|1063|5347|9700|9787	BUB1|CCNB1|CDC20|CENPE|CENPF|PLK1|ESPL1|DLGAP5	-5.34028	0	1	0	0	-13.8149	22.2884
1	-8.27179	GO:0007052	M1	1	0	GO Biological Processes	19	mitotic spindle organization	-8.27179	13.0356	10.6025	24155	109	170	10	5.88235	1.80462	332|891|991|1062|4751|5347|9055|9493|24137|440145	BIRC5|CCNB1|CDC20|CENPE|NEK2|PLK1|PRC1|KIF23|KIF4A|MZT1	-5.26824	0	1	0	0	-13.8149	22.2884
1	-8.2647	GO:0044784	M1	1	0	GO Biological Processes	19	metaphase/anaphase transition of cell cycle	-8.2647	20.2983	12.172	24155	56	170	8	4.70588	1.62416	699|891|991|1062|1063|5347|9700|9787	BUB1|CCNB1|CDC20|CENPE|CENPF|PLK1|ESPL1|DLGAP5	-5.26824	0	1	0	0	-13.8149	22.2884
1	-8.20162	GO:0010965	M1	1	0	GO Biological Processes	19	regulation of mitotic sister chromatid separation	-8.20162	19.9422	12.0539	24155	57	170	8	4.70588	1.62416	699|891|991|1062|1063|5347|9700|9787	BUB1|CCNB1|CDC20|CENPE|CENPF|PLK1|ESPL1|DLGAP5	-5.23149	0	1	0	0	-13.8149	22.2884
1	-8.0195	GO:0051306	M1	1	0	GO Biological Processes	19	mitotic sister chromatid separation	-8.0195	18.9451	11.7167	24155	60	170	8	4.70588	1.62416	699|891|991|1062|1063|5347|9700|9787	BUB1|CCNB1|CDC20|CENPE|CENPF|PLK1|ESPL1|DLGAP5	-5.0742	0	1	0	0	-13.8149	22.2884
1	-7.90364	GO:1905818	M1	1	0	GO Biological Processes	19	regulation of chromosome separation	-7.90364	18.334	11.5053	24155	62	170	8	4.70588	1.62416	699|891|991|1062|1063|5347|9700|9787	BUB1|CCNB1|CDC20|CENPE|CENPF|PLK1|ESPL1|DLGAP5	-4.98181	0	1	0	0	-13.8149	22.2884
1	-7.71278	GO:0000226	M1	1	0	GO Biological Processes	19	microtubule cytoskeleton organization	-7.71278	4.78666	7.66076	24155	564	170	19	11.1765	2.41653	332|891|991|1058|1062|4751|5347|9055|9493|9700|10112|10615|11004|24137|51364|259266|283431|387103|440145	BIRC5|CCNB1|CDC20|CENPA|CENPE|NEK2|PLK1|PRC1|KIF23|ESPL1|KIF20A|SPAG5|KIF2C|KIF4A|ZMYND10|ASPM|GAS2L3|CENPW|MZT1	-4.81624	0	1	0	0	-13.8149	22.2884
1	-7.69459	GO:0051225	M1	1	0	GO Biological Processes	19	spindle assembly	-7.69459	11.3671	9.78324	24155	125	170	10	5.88235	1.80462	332|991|4751|5347|9493|10615|24137|259266|387103|440145	BIRC5|CDC20|NEK2|PLK1|KIF23|SPAG5|KIF4A|ASPM|CENPW|MZT1	-4.81624	0	1	0	0	-13.8149	22.2884
1	-7.57948	GO:0033047	M1	1	0	GO Biological Processes	19	regulation of mitotic sister chromatid segregation	-7.57948	16.7163	10.926	24155	68	170	8	4.70588	1.62416	699|891|991|1062|1063|5347|9700|9787	BUB1|CCNB1|CDC20|CENPE|CENPF|PLK1|ESPL1|DLGAP5	-4.72133	0	1	0	0	-13.8149	22.2884
1	-7.10407	GO:0051303	M1	1	0	GO Biological Processes	19	establishment of chromosome localization	-7.10407	14.5732	10.1082	24155	78	170	8	4.70588	1.62416	891|1062|1063|9787|10615|11004|55143|81610	CCNB1|CENPE|CENPF|DLGAP5|SPAG5|KIF2C|CDCA8|FAM83D	-4.26522	0	2	1	1	-7.10407	35.5221
1	-7.06029	GO:0050000	M1	1	0	GO Biological Processes	19	chromosome localization	-7.06029	14.3887	10.0348	24155	79	170	8	4.70588	1.62416	891|1062|1063|9787|10615|11004|55143|81610	CCNB1|CENPE|CENPF|DLGAP5|SPAG5|KIF2C|CDCA8|FAM83D	-4.23992	0	2	0	0	-7.10407	35.5221
1	-7.01712	GO:0033045	M1	1	0	GO Biological Processes	19	regulation of sister chromatid segregation	-7.01712	14.2088	9.96266	24155	80	170	8	4.70588	1.62416	699|891|991|1062|1063|5347|9700|9787	BUB1|CCNB1|CDC20|CENPE|CENPF|PLK1|ESPL1|DLGAP5	-4.21449	0	1	0	0	-13.8149	22.2884
1	-6.72251	GO:0090307	M1	1	0	GO Biological Processes	19	mitotic spindle assembly	-6.72251	16.8579	10.2671	24155	59	170	7	4.11765	1.52395	332|991|4751|5347|9493|24137|440145	BIRC5|CDC20|NEK2|PLK1|KIF23|KIF4A|MZT1	-3.9369	0	1	0	0	-13.8149	22.2884
1	-6.67119	GO:0051310	M1	1	0	GO Biological Processes	19	metaphase plate congression	-6.67119	16.577	10.1705	24155	60	170	7	4.11765	1.52395	891|1062|1063|10615|11004|55143|81610	CCNB1|CENPE|CENPF|SPAG5|KIF2C|CDCA8|FAM83D	-3.90198	0	2	0	0	-7.10407	35.5221
1	-6.61584	GO:0051304	M1	1	0	GO Biological Processes	19	chromosome separation	-6.61584	12.6301	9.30593	24155	90	170	8	4.70588	1.62416	699|891|991|1062|1063|5347|9700|9787	BUB1|CCNB1|CDC20|CENPE|CENPF|PLK1|ESPL1|DLGAP5	-3.86242	0	1	0	0	-13.8149	22.2884
1	-6.52955	GO:0007088	M1	1	0	GO Biological Processes	19	regulation of mitotic nuclear division	-6.52955	8.55953	8.22796	24155	166	170	10	5.88235	1.80462	699|891|991|1062|1063|4288|4751|5347|9700|9787	BUB1|CCNB1|CDC20|CENPE|CENPF|MKI67|NEK2|PLK1|ESPL1|DLGAP5	-3.79602	0	1	0	0	-13.8149	22.2884
1	-6.51948	GO:0051383	M1	1	0	GO Biological Processes	19	kinetochore organization	-6.51948	33.8305	12.6713	24155	21	170	5	2.94118	1.29585	1058|1062|1063|10051|387103	CENPA|CENPE|CENPF|SMC4|CENPW	-3.79602	0	3	1	1	-6.51948	35.5221
1	-6.32138	GO:0007017	M1	1	0	GO Biological Processes	19	microtubule-based process	-6.32138	3.71959	6.43094	24155	764	170	20	11.7647	2.47108	332|891|991|1058|1062|4751|5347|9055|9493|9700|9787|10112|10615|11004|24137|51364|259266|283431|387103|440145	BIRC5|CCNB1|CDC20|CENPA|CENPE|NEK2|PLK1|PRC1|KIF23|ESPL1|DLGAP5|KIF20A|SPAG5|KIF2C|KIF4A|ZMYND10|ASPM|GAS2L3|CENPW|MZT1	-3.61217	0	1	0	0	-13.8149	22.2884
1	-6.20126	GO:0033046	M1	1	0	GO Biological Processes	19	negative regulation of sister chromatid segregation	-6.20126	19.3757	10.271	24155	44	170	6	3.52941	1.41522	699|891|991|1063|5347|9700	BUB1|CCNB1|CDC20|CENPF|PLK1|ESPL1	-3.50583	0	1	0	0	-13.8149	22.2884
1	-6.14164	GO:0051985	M1	1	0	GO Biological Processes	19	negative regulation of chromosome segregation	-6.14164	18.9451	10.1438	24155	45	170	6	3.52941	1.41522	699|891|991|1063|5347|9700	BUB1|CCNB1|CDC20|CENPF|PLK1|ESPL1	-3.45958	0	1	0	0	-13.8149	22.2884
1	-6.07932	GO:0000281	M1	1	0	GO Biological Processes	19	mitotic cytokinesis	-6.07932	13.6249	9.09478	24155	73	170	7	4.11765	1.52395	1058|5347|9493|9700|10112|11113|24137	CENPA|PLK1|KIF23|ESPL1|KIF20A|CIT|KIF4A	-3.41023	0	4	1	1	-6.07932	13.6249
1	-5.99047	GO:0051783	M1	1	0	GO Biological Processes	19	regulation of nuclear division	-5.99047	7.47833	7.54745	24155	190	170	10	5.88235	1.80462	699|891|991|1062|1063|4288|4751|5347|9700|9787	BUB1|CCNB1|CDC20|CENPE|CENPF|MKI67|NEK2|PLK1|ESPL1|DLGAP5	-3.33396	0	1	0	0	-13.8149	22.2884
1	-5.60515	GO:0044770	M1	1	0	GO Biological Processes	19	cell cycle phase transition	-5.60515	3.82805	6.06032	24155	631	170	17	10	2.30089	699|890|891|991|1030|1033|1062|1063|1978|4751|5347|9700|9787|11113|81610|128239|219736	BUB1|CCNA2|CCNB1|CDC20|CDKN2B|CDKN3|CENPE|CENPF|EIF4EBP1|NEK2|PLK1|ESPL1|DLGAP5|CIT|FAM83D|IQGAP3|STOX1	-2.96087	0	1	0	0	-13.8149	22.2884
1	-5.55122	GO:0008608	M1	1	0	GO Biological Processes	19	attachment of spindle microtubules to kinetochore	-5.55122	22.2013	10.1035	24155	32	170	5	2.94118	1.29585	891|1062|4751|10615|11004	CCNB1|CENPE|NEK2|SPAG5|KIF2C	-2.91884	0	2	0	0	-7.10407	35.5221
1	-5.41572	GO:0007094	M1	1	0	GO Biological Processes	19	mitotic spindle assembly checkpoint	-5.41572	20.8953	9.77332	24155	34	170	5	2.94118	1.29585	699|891|991|1063|5347	BUB1|CCNB1|CDC20|CENPF|PLK1	-2.82793	0	1	0	0	-13.8149	22.2884
1	-5.41572	GO:0031577	M1	1	0	GO Biological Processes	19	spindle checkpoint	-5.41572	20.8953	9.77332	24155	34	170	5	2.94118	1.29585	699|891|991|1063|5347	BUB1|CCNB1|CDC20|CENPF|PLK1	-2.82793	0	1	0	0	-13.8149	22.2884
1	-5.41572	GO:0071173	M1	1	0	GO Biological Processes	19	spindle assembly checkpoint	-5.41572	20.8953	9.77332	24155	34	170	5	2.94118	1.29585	699|891|991|1063|5347	BUB1|CCNB1|CDC20|CENPF|PLK1	-2.82793	0	1	0	0	-13.8149	22.2884
1	-5.41572	GO:0071174	M1	1	0	GO Biological Processes	19	mitotic spindle checkpoint	-5.41572	20.8953	9.77332	24155	34	170	5	2.94118	1.29585	699|891|991|1063|5347	BUB1|CCNB1|CDC20|CENPF|PLK1	-2.82793	0	1	0	0	-13.8149	22.2884
1	-5.39419	GO:0051382	M1	1	0	GO Biological Processes	19	kinetochore assembly	-5.39419	35.5221	11.6291	24155	16	170	4	2.35294	1.16255	1058|1062|1063|387103	CENPA|CENPE|CENPF|CENPW	-2.81686	0	3	0	0	-6.51948	35.5221
1	-5.35761	GO:0044772	M1	1	0	GO Biological Processes	19	mitotic cell cycle phase transition	-5.35761	3.86635	5.92399	24155	588	170	16	9.41176	2.23948	699|890|891|991|1030|1033|1062|1063|1978|4751|5347|9700|9787|11113|128239|219736	BUB1|CCNA2|CCNB1|CDC20|CDKN2B|CDKN3|CENPE|CENPF|EIF4EBP1|NEK2|PLK1|ESPL1|DLGAP5|CIT|IQGAP3|STOX1	-2.7905	0	1	0	0	-13.8149	22.2884
1	-5.28878	GO:0045841	M1	1	0	GO Biological Processes	19	negative regulation of mitotic metaphase/anaphase transition	-5.28878	19.7345	9.47027	24155	36	170	5	2.94118	1.29585	699|891|991|1063|5347	BUB1|CCNB1|CDC20|CENPF|PLK1	-2.73165	0	1	0	0	-13.8149	22.2884
1	-5.22819	GO:1902100	M1	1	0	GO Biological Processes	19	negative regulation of metaphase/anaphase transition of cell cycle	-5.22819	19.2011	9.32776	24155	37	170	5	2.94118	1.29585	699|891|991|1063|5347	BUB1|CCNB1|CDC20|CENPF|PLK1	-2.68083	0	1	0	0	-13.8149	22.2884
1	-5.17332	GO:0032693	M1	1	0	GO Biological Processes	19	negative regulation of interleukin-10 production	-5.17332	31.5752	10.9248	24155	18	170	4	2.35294	1.16255	3718|27242|64115|80380	JAK3|TNFRSF21|VSIR|PDCD1LG2	-2.6355	0	5	1	1	-5.17332	31.5752
1	-5.15613	GO:0061640	M1	1	0	GO Biological Processes	19	cytoskeleton-dependent cytokinesis	-5.15613	9.94618	7.54717	24155	100	170	7	4.11765	1.52395	1058|5347|9493|9700|10112|11113|24137	CENPA|PLK1|KIF23|ESPL1|KIF20A|CIT|KIF4A	-2.62766	0	4	0	0	-6.07932	13.6249
1	-5.11228	GO:2000816	M1	1	0	GO Biological Processes	19	negative regulation of mitotic sister chromatid separation	-5.11228	18.2164	9.05883	24155	39	170	5	2.94118	1.29585	699|891|991|1063|5347	BUB1|CCNB1|CDC20|CENPF|PLK1	-2.59294	0	1	0	0	-13.8149	22.2884
1	-5.05675	GO:1905819	M1	1	0	GO Biological Processes	19	negative regulation of chromosome separation	-5.05675	17.761	8.93174	24155	40	170	5	2.94118	1.29585	699|891|991|1063|5347	BUB1|CCNB1|CDC20|CENPF|PLK1	-2.54637	0	1	0	0	-13.8149	22.2884
1	-4.95016	GO:0033048	M1	1	0	GO Biological Processes	19	negative regulation of mitotic sister chromatid segregation	-4.95016	16.9153	8.69085	24155	42	170	5	2.94118	1.29585	699|891|991|1063|5347	BUB1|CCNB1|CDC20|CENPF|PLK1	-2.44855	0	1	0	0	-13.8149	22.2884
1	-4.91087	GO:0010564	M1	1	0	GO Biological Processes	19	regulation of cell cycle process	-4.91087	3.24156	5.38946	24155	789	170	18	10.5882	2.35985	699|891|991|1030|1062|1063|4288|4751|5347|9055|9493|9700|9787|10112|10615|11113|81610|219736	BUB1|CCNB1|CDC20|CDKN2B|CENPE|CENPF|MKI67|NEK2|PLK1|PRC1|KIF23|ESPL1|DLGAP5|KIF20A|SPAG5|CIT|FAM83D|STOX1	-2.41787	0	1	0	0	-13.8149	22.2884
1	-4.7913	GO:0051656	M1	1	0	GO Biological Processes	19	establishment of organelle localization	-4.7913	3.90046	5.57355	24155	510	170	14	8.23529	2.1084	891|1058|1062|1063|5347|9493|9700|9787|10615|10675|11004|23025|55143|81610	CCNB1|CENPA|CENPE|CENPF|PLK1|KIF23|ESPL1|DLGAP5|SPAG5|CSPG5|KIF2C|UNC13A|CDCA8|FAM83D	-2.30673	0	1	0	0	-13.8149	22.2884
1	-4.70848	GO:0007613	M1	1	0	GO Biological Processes	19	memory	-4.70848	8.50101	6.84719	24155	117	170	7	4.11765	1.52395	348|1979|4909|5021|6326|6543|266977	APOE|EIF4EBP2|NTF4|OXTR|SCN2A|SLC8A2|ADGRF1	-2.23218	0	6	1	1	-4.70848	8.50101
1	-4.55458	GO:0000022	M1	1	0	GO Biological Processes	19	mitotic spindle elongation	-4.55458	47.3627	11.7116	24155	9	170	3	1.76471	1.00982	9055|9493|24137	PRC1|KIF23|KIF4A	-2.0864	0	7	1	1	-4.55458	47.3627
1	-4.52825	GO:0000910	M1	1	0	GO Biological Processes	19	cytokinesis	-4.52825	6.6474	6.23929	24155	171	170	8	4.70588	1.62416	1058|5347|9055|9493|9700|10112|11113|24137	CENPA|PLK1|PRC1|KIF23|ESPL1|KIF20A|CIT|KIF4A	-2.06804	0	4	0	0	-6.07932	13.6249
1	-4.48978	GO:0045839	M1	1	0	GO Biological Processes	19	negative regulation of mitotic nuclear division	-4.48978	13.6623	7.69536	24155	52	170	5	2.94118	1.29585	699|891|991|1063|5347	BUB1|CCNB1|CDC20|CENPF|PLK1	-2.03739	0	1	0	0	-13.8149	22.2884
1	-4.4527	GO:0033044	M1	1	0	GO Biological Processes	19	regulation of chromosome organization	-4.4527	4.53035	5.56028	24155	345	170	11	6.47059	1.88678	699|891|991|1062|1063|4288|4751|5347|9700|9787|59335	BUB1|CCNB1|CDC20|CENPE|CENPF|MKI67|NEK2|PLK1|ESPL1|DLGAP5|PRDM12	-2.008	0	1	0	0	-13.8149	22.2884
1	-4.40193	GO:0051231	M1	1	0	GO Biological Processes	19	spindle elongation	-4.40193	42.6265	11.0842	24155	10	170	3	1.76471	1.00982	9055|9493|24137	PRC1|KIF23|KIF4A	-1.96478	0	7	0	0	-4.55458	47.3627
1	-4.38278	GO:0051640	M1	1	0	GO Biological Processes	19	organelle localization	-4.38278	3.22013	5.04043	24155	706	170	16	9.41176	2.23948	891|1058|1062|1063|4751|5347|9493|9700|9787|10615|10675|11004|23025|55143|81610|259266	CCNB1|CENPA|CENPE|CENPF|NEK2|PLK1|KIF23|ESPL1|DLGAP5|SPAG5|CSPG5|KIF2C|UNC13A|CDCA8|FAM83D|ASPM	-1.95305	0	1	0	0	-13.8149	22.2884
1	-4.33239	GO:0034508	M1	1	0	GO Biological Processes	19	centromere complex assembly	-4.33239	12.6864	7.371	24155	56	170	5	2.94118	1.29585	1058|1062|1063|55355|387103	CENPA|CENPE|CENPF|HJURP|CENPW	-1.90997	0	3	0	0	-6.51948	35.5221
1	-4.18697	GO:0051784	M1	1	0	GO Biological Processes	19	negative regulation of nuclear division	-4.18697	11.8407	7.07812	24155	60	170	5	2.94118	1.29585	699|891|991|1063|5347	BUB1|CCNB1|CDC20|CENPF|PLK1	-1.77173	0	1	0	0	-13.8149	22.2884
1	-4.1432	GO:0051988	M1	1	0	GO Biological Processes	19	regulation of attachment of spindle microtubules to kinetochore	-4.1432	35.5221	10.0703	24155	12	170	3	1.76471	1.00982	891|4751|10615	CCNB1|NEK2|SPAG5	-1.73501	0	2	0	0	-7.10407	35.5221
1	-3.97426	GO:1904029	M1	1	0	GO Biological Processes	19	regulation of cyclin-dependent protein kinase activity	-3.97426	8.04273	6.11779	24155	106	170	6	3.52941	1.41522	890|891|1030|1033|5347|219736	CCNA2|CCNB1|CDKN2B|CDKN3|PLK1|STOX1	-1.57303	0	8	1	1	-3.97426	8.04273
1	-3.79825	GO:1901987	M1	1	0	GO Biological Processes	19	regulation of cell cycle phase transition	-3.79825	3.55221	4.75489	24155	480	170	12	7.05882	1.96447	699|891|991|1030|1062|1063|4751|5347|9700|9787|81610|219736	BUB1|CCNB1|CDC20|CDKN2B|CENPE|CENPF|NEK2|PLK1|ESPL1|DLGAP5|FAM83D|STOX1	-1.40386	0	1	0	0	-13.8149	22.2884
1	-3.55775	GO:0050804	M1	1	0	GO Biological Processes	19	modulation of chemical synaptic transmission	-3.55775	3.58479	4.58533	24155	436	170	11	6.47059	1.88678	348|991|1979|2983|4909|5021|6543|6623|7779|10675|23025	APOE|CDC20|EIF4EBP2|GUCY1B1|NTF4|OXTR|SLC8A2|SNCG|SLC30A1|CSPG5|UNC13A	-1.17009	0	6	0	0	-4.70848	8.50101
1	-3.54929	GO:0099177	M1	1	0	GO Biological Processes	19	regulation of trans-synaptic signaling	-3.54929	3.57659	4.57611	24155	437	170	11	6.47059	1.88678	348|991|1979|2983|4909|5021|6543|6623|7779|10675|23025	APOE|CDC20|EIF4EBP2|GUCY1B1|NTF4|OXTR|SLC8A2|SNCG|SLC30A1|CSPG5|UNC13A	-1.16826	0	6	0	0	-4.70848	8.50101
1	-3.4908	GO:1901990	M1	1	0	GO Biological Processes	19	regulation of mitotic cell cycle phase transition	-3.4908	3.5202	4.51234	24155	444	170	11	6.47059	1.88678	699|891|991|1030|1062|1063|4751|5347|9700|9787|219736	BUB1|CCNB1|CDC20|CDKN2B|CENPE|CENPF|NEK2|PLK1|ESPL1|DLGAP5|STOX1	-1.11629	0	1	0	0	-13.8149	22.2884
1	-3.47679	GO:0007080	M1	1	0	GO Biological Processes	19	mitotic metaphase plate congression	-3.47679	12.0926	6.40843	24155	47	170	4	2.35294	1.16255	891|1062|11004|55143	CCNB1|CENPE|KIF2C|CDCA8	-1.11439	0	2	0	0	-7.10407	35.5221
1	-3.47612	GO:0008285	M1	1	0	GO Biological Processes	19	negative regulation of cell proliferation	-3.47612	2.79701	4.2436	24155	762	170	15	8.82353	2.17539	348|1030|1033|1264|3486|4856|5739|5828|9289|9536|10202|27242|51286|64115|80380	APOE|CDKN2B|CDKN3|CNN1|IGFBP3|CCN3|PTGIR|PEX2|ADGRG1|PTGES|DHRS2|TNFRSF21|CEND1|VSIR|PDCD1LG2	-1.11439	0	9	1	1	-3.47612	2.79701
1	-3.44137	GO:0051653	M1	1	0	GO Biological Processes	19	spindle localization	-3.44137	11.8407	6.32929	24155	48	170	4	2.35294	1.16255	1058|5347|9700|259266	CENPA|PLK1|ESPL1|ASPM	-1.08589	0	4	0	0	-6.07932	13.6249
1	-3.42376	GO:0000086	M1	1	0	GO Biological Processes	19	G2/M transition of mitotic cell cycle	-3.42376	4.60205	4.79044	24155	247	170	8	4.70588	1.62416	890|891|1030|1063|4751|5347|11113|219736	CCNA2|CCNB1|CDKN2B|CENPF|NEK2|PLK1|CIT|STOX1	-1.07444	0	8	0	0	-3.97426	8.04273
1	-3.37739	GO:0032465	M1	1	0	GO Biological Processes	19	regulation of cytokinesis	-3.37739	7.98249	5.55587	24155	89	170	5	2.94118	1.29585	5347|9055|9493|10112|11113	PLK1|PRC1|KIF23|KIF20A|CIT	-1.03415	0	4	0	0	-6.07932	13.6249
1	-3.30743	GO:0032653	M1	1	0	GO Biological Processes	19	regulation of interleukin-10 production	-3.30743	10.9299	6.03474	24155	52	170	4	2.35294	1.16255	3718|27242|64115|80380	JAK3|TNFRSF21|VSIR|PDCD1LG2	-0.987667	0	5	0	0	-5.17332	31.5752
1	-3.32075	GO:0007611	M1	1	0	GO Biological Processes	19	learning or memory	-3.32075	4.44026	4.65876	24155	256	170	8	4.70588	1.62416	348|1979|4909|5021|6326|6543|9379|266977	APOE|EIF4EBP2|NTF4|OXTR|SCN2A|SLC8A2|NRXN2|ADGRF1	-0.987667	0	6	0	0	-4.70848	8.50101
1	-3.30827	GO:0007268	M1	1	0	GO Biological Processes	19	chemical synaptic transmission	-3.30827	2.81761	4.12659	24155	706	170	14	8.23529	2.1084	348|991|1979|2983|3362|3780|4909|5021|6543|6623|7779|9379|10675|23025	APOE|CDC20|EIF4EBP2|GUCY1B1|HTR6|KCNN1|NTF4|OXTR|SLC8A2|SNCG|SLC30A1|NRXN2|CSPG5|UNC13A	-0.987667	0	6	0	0	-4.70848	8.50101
1	-3.30827	GO:0098916	M1	1	0	GO Biological Processes	19	anterograde trans-synaptic signaling	-3.30827	2.81761	4.12659	24155	706	170	14	8.23529	2.1084	348|991|1979|2983|3362|3780|4909|5021|6543|6623|7779|9379|10675|23025	APOE|CDC20|EIF4EBP2|GUCY1B1|HTR6|KCNN1|NTF4|OXTR|SLC8A2|SNCG|SLC30A1|NRXN2|CSPG5|UNC13A	-0.987667	0	6	0	0	-4.70848	8.50101
1	-3.30061	GO:0070482	M1	1	0	GO Biological Processes	19	response to oxygen levels	-3.30061	3.6063	4.39126	24155	394	170	10	5.88235	1.80462	890|891|1277|1978|5021|5352|5366|6326|6781|219736	CCNA2|CCNB1|COL1A1|EIF4EBP1|OXTR|PLOD2|PMAIP1|SCN2A|STC1|STOX1	-0.986522	0	10	1	1	-3.30061	4.80492
1	-3.26018	GO:0099537	M1	1	0	GO Biological Processes	19	trans-synaptic signaling	-3.26018	2.78604	4.07852	24155	714	170	14	8.23529	2.1084	348|991|1979|2983|3362|3780|4909|5021|6543|6623|7779|9379|10675|23025	APOE|CDC20|EIF4EBP2|GUCY1B1|HTR6|KCNN1|NTF4|OXTR|SLC8A2|SNCG|SLC30A1|NRXN2|CSPG5|UNC13A	-0.951697	0	6	0	0	-4.70848	8.50101
1	-3.22288	GO:2001251	M1	1	0	GO Biological Processes	19	negative regulation of chromosome organization	-3.22288	5.83924	4.9376	24155	146	170	6	3.52941	1.41522	699|891|991|1063|5347|9700	BUB1|CCNB1|CDC20|CENPF|PLK1|ESPL1	-0.925392	0	1	0	0	-13.8149	22.2884
1	-3.22462	GO:0099536	M1	1	0	GO Biological Processes	19	synaptic signaling	-3.22462	2.76283	4.0429	24155	720	170	14	8.23529	2.1084	348|991|1979|2983|3362|3780|4909|5021|6543|6623|7779|9379|10675|23025	APOE|CDC20|EIF4EBP2|GUCY1B1|HTR6|KCNN1|NTF4|OXTR|SLC8A2|SNCG|SLC30A1|NRXN2|CSPG5|UNC13A	-0.925392	0	6	0	0	-4.70848	8.50101
1	-3.21425	GO:0032613	M1	1	0	GO Biological Processes	19	interleukin-10 production	-3.21425	10.3337	5.83412	24155	55	170	4	2.35294	1.16255	3718|27242|64115|80380	JAK3|TNFRSF21|VSIR|PDCD1LG2	-0.924687	0	5	0	0	-5.17332	31.5752
1	-3.21145	GO:0044839	M1	1	0	GO Biological Processes	19	cell cycle G2/M phase transition	-3.21145	4.27333	4.5194	24155	266	170	8	4.70588	1.62416	890|891|1030|1063|4751|5347|11113|219736	CCNA2|CCNB1|CDKN2B|CENPF|NEK2|PLK1|CIT|STOX1	-0.924687	0	8	0	0	-3.97426	8.04273
1	-3.16822	GO:0071456	M1	1	0	GO Biological Processes	19	cellular response to hypoxia	-3.16822	4.80492	4.62855	24155	207	170	7	4.11765	1.52395	890|891|1978|5366|6326|6781|219736	CCNA2|CCNB1|EIF4EBP1|PMAIP1|SCN2A|STC1|STOX1	-0.886718	0	10	0	0	-3.30061	4.80492
1	-3.10676	GO:0000079	M1	1	0	GO Biological Processes	19	regulation of cyclin-dependent protein serine/threonine kinase activity	-3.10676	6.96511	5.08257	24155	102	170	5	2.94118	1.29585	890|891|1030|1033|5347	CCNA2|CCNB1|CDKN2B|CDKN3|PLK1	-0.834891	0	8	0	0	-3.97426	8.04273
1	-3.10605	GO:0072503	M1	1	0	GO Biological Processes	19	cellular divalent inorganic cation homeostasis	-3.10605	3.16391	4.09105	24155	494	170	11	6.47059	1.88678	348|719|4035|4501|5021|5731|5739|6543|6781|7779|11151	APOE|C3AR1|LRP1|MT1X|OXTR|PTGER1|PTGIR|SLC8A2|STC1|SLC30A1|CORO1A	-0.834891	0	11	1	1	-3.10605	3.55221
1	-3.07442	GO:0007346	M1	1	0	GO Biological Processes	19	regulation of mitotic cell cycle	-3.07442	2.79447	3.9383	24155	661	170	13	7.64706	2.03821	699|891|991|1030|1062|1063|1978|4288|4751|5347|9700|9787|219736	BUB1|CCNB1|CDC20|CDKN2B|CENPE|CENPF|EIF4EBP1|MKI67|NEK2|PLK1|ESPL1|DLGAP5|STOX1	-0.808345	0	1	0	0	-13.8149	22.2884
1	-3.05978	GO:0019935	M1	1	0	GO Biological Processes	19	cyclic-nucleotide-mediated signaling	-3.05978	4.60471	4.48016	24155	216	170	7	4.11765	1.52395	348|1979|2983|5731|5739|9289|266977	APOE|EIF4EBP2|GUCY1B1|PTGER1|PTGIR|ADGRG1|ADGRF1	-0.798724	0	12	1	1	-3.05978	4.60471
1	-3.04808	GO:0036294	M1	1	0	GO Biological Processes	19	cellular response to decreased oxygen levels	-3.04808	4.58349	4.46418	24155	217	170	7	4.11765	1.52395	890|891|1978|5366|6326|6781|219736	CCNA2|CCNB1|EIF4EBP1|PMAIP1|SCN2A|STC1|STOX1	-0.792545	0	10	0	0	-3.30061	4.80492
1	-3.04373	GO:0016266	M1	1	0	GO Biological Processes	19	O-glycan processing	-3.04373	9.31726	5.4757	24155	61	170	4	2.35294	1.16255	4585|10331|200958|728819	MUC4|B3GNT3|MUC20|C1GALT1C1L	-0.792545	0	13	1	1	-3.04373	9.31726
1	-3.03136	GO:1901989	M1	1	0	GO Biological Processes	19	positive regulation of cell cycle phase transition	-3.03136	6.70228	4.95338	24155	106	170	5	2.94118	1.29585	891|9700|9787|81610|219736	CCNB1|ESPL1|DLGAP5|FAM83D|STOX1	-0.785021	0	14	1	1	-3.03136	15.2237
1	-3.00621	GO:0051984	M1	1	0	GO Biological Processes	19	positive regulation of chromosome segregation	-3.00621	15.2237	6.34001	24155	28	170	3	1.76471	1.00982	891|9700|9787	CCNB1|ESPL1|DLGAP5	-0.764679	0	14	0	0	-3.03136	15.2237
1	-2.99101	GO:0007062	M1	1	0	GO Biological Processes	19	sister chromatid cohesion	-2.99101	9.02148	5.36707	24155	63	170	4	2.35294	1.16255	699|991|5347|9700	BUB1|CDC20|PLK1|ESPL1	-0.758434	0	1	0	0	-13.8149	22.2884
1	-2.99053	GO:0070663	M1	1	0	GO Biological Processes	19	regulation of leukocyte proliferation	-2.99053	4.48026	4.3857	24155	222	170	7	4.11765	1.52395	933|3718|4254|11151|27242|64115|80380	CD22|JAK3|KITLG|CORO1A|TNFRSF21|VSIR|PDCD1LG2	-0.758434	0	5	0	0	-5.17332	31.5752
1	-2.96672	GO:0072507	M1	1	0	GO Biological Processes	19	divalent inorganic cation homeostasis	-2.96672	3.0408	3.9373	24155	514	170	11	6.47059	1.88678	348|719|4035|4501|5021|5731|5739|6543|6781|7779|11151	APOE|C3AR1|LRP1|MT1X|OXTR|PTGER1|PTGIR|SLC8A2|STC1|SLC30A1|CORO1A	-0.739266	0	11	0	0	-3.10605	3.55221
1	-2.9463	GO:0007093	M1	1	0	GO Biological Processes	19	mitotic cell cycle checkpoint	-2.9463	5.16684	4.52151	24155	165	170	6	3.52941	1.41522	699|891|991|1030|1063|5347	BUB1|CCNB1|CDC20|CDKN2B|CENPF|PLK1	-0.723445	0	1	0	0	-13.8149	22.2884
1	-2.94159	GO:0006493	M1	1	0	GO Biological Processes	19	protein O-linked glycosylation	-2.94159	6.40037	4.80099	24155	111	170	5	2.94118	1.29585	4585|5352|10331|200958|728819	MUC4|PLOD2|B3GNT3|MUC20|C1GALT1C1L	-0.723286	0	13	0	0	-3.04373	9.31726
1	-2.9123	GO:0050890	M1	1	0	GO Biological Processes	19	cognition	-2.9123	3.84022	4.13925	24155	296	170	8	4.70588	1.62416	348|1979|4909|5021|6326|6543|9379|266977	APOE|EIF4EBP2|NTF4|OXTR|SCN2A|SLC8A2|NRXN2|ADGRF1	-0.698499	0	6	0	0	-4.70848	8.50101
1	-2.90611	GO:0051302	M1	1	0	GO Biological Processes	19	regulation of cell division	-2.90611	5.07458	4.46168	24155	168	170	6	3.52941	1.41522	5347|9055|9493|10112|11113|259266	PLK1|PRC1|KIF23|KIF20A|CIT|ASPM	-0.69676	0	4	0	0	-6.07932	13.6249
1	-2.89267	GO:0036293	M1	1	0	GO Biological Processes	19	response to decreased oxygen levels	-2.89267	3.4562	4.00832	24155	370	170	9	5.29412	1.71736	890|891|1978|5021|5352|5366|6326|6781|219736	CCNA2|CCNB1|EIF4EBP1|OXTR|PLOD2|PMAIP1|SCN2A|STC1|STOX1	-0.695166	0	10	0	0	-3.30061	4.80492
1	-2.89375	GO:0090068	M1	1	0	GO Biological Processes	19	positive regulation of cell cycle process	-2.89375	3.81445	4.11569	24155	298	170	8	4.70588	1.62416	891|9493|9700|9787|10615|11113|81610|219736	CCNB1|KIF23|ESPL1|DLGAP5|SPAG5|CIT|FAM83D|STOX1	-0.695166	0	14	0	0	-3.03136	15.2237
1	-2.89142	GO:0050673	M1	1	0	GO Biological Processes	19	epithelial cell proliferation	-2.89142	3.18583	3.92263	24155	446	170	10	5.88235	1.80462	348|1030|1893|3148|3486|4856|5828|10413|128239|219736	APOE|CDKN2B|ECM1|HMGB2|IGFBP3|CCN3|PEX2|YAP1|IQGAP3|STOX1	-0.695166	0	15	1	1	-2.89142	3.18583
1	-2.88013	GO:0051051	M1	1	0	GO Biological Processes	19	negative regulation of transport	-2.88013	2.96579	3.8413	24155	527	170	11	6.47059	1.88678	348|933|4856|5021|6721|6781|7779|11151|27242|144453|338440	APOE|CD22|CCN3|OXTR|SREBF2|STC1|SLC30A1|CORO1A|TNFRSF21|BEST3|ANO9	-0.688148	0	11	0	0	-3.10605	3.55221
1	-2.85873	GO:0071453	M1	1	0	GO Biological Processes	19	cellular response to oxygen levels	-2.85873	4.2505	4.20647	24155	234	170	7	4.11765	1.52395	890|891|1978|5366|6326|6781|219736	CCNA2|CCNB1|EIF4EBP1|PMAIP1|SCN2A|STC1|STOX1	-0.670988	0	10	0	0	-3.30061	4.80492
1	-2.85385	GO:0140013	M1	1	0	GO Biological Processes	19	meiotic nuclear division	-2.85385	4.95657	4.3841	24155	172	170	6	3.52941	1.41522	699|991|5347|9700|10051|259266	BUB1|CDC20|PLK1|ESPL1|SMC4|ASPM	-0.670308	0	1	0	0	-13.8149	22.2884
1	-2.84471	GO:0043269	M1	1	0	GO Biological Processes	19	regulation of ion transport	-2.84471	2.63502	3.69847	24155	701	170	13	7.64706	2.03821	348|1272|6326|6623|6781|7779|11151|23204|84258|90134|144245|144453|338440	APOE|CNTN1|SCN2A|SNCG|STC1|SLC30A1|CORO1A|ARL6IP1|SYT3|KCNH7|ALG10B|BEST3|ANO9	-0.665317	0	16	1	1	-2.84471	5.98266
1	-2.82024	GO:0072091	M1	1	0	GO Biological Processes	19	regulation of stem cell proliferation	-2.82024	8.11933	5.02185	24155	70	170	4	2.35294	1.16255	3148|4254|10413|259266	HMGB2|KITLG|YAP1|ASPM	-0.644972	0	17	1	1	-2.82024	8.11933
1	-2.80627	GO:0051402	M1	1	0	GO Biological Processes	19	neuron apoptotic process	-2.80627	4.16158	4.13531	24155	239	170	7	4.11765	1.52395	348|4035|4909|6326|11113|11151|27242	APOE|LRP1|NTF4|SCN2A|CIT|CORO1A|TNFRSF21	-0.635081	0	18	1	1	-2.80627	10.9299
1	-2.79588	GO:0040001	M1	1	0	GO Biological Processes	19	establishment of mitotic spindle localization	-2.79588	12.9171	5.76727	24155	33	170	3	1.76471	1.00982	1058|5347|9700	CENPA|PLK1|ESPL1	-0.632726	0	4	0	0	-6.07932	13.6249
1	-2.79911	GO:0006874	M1	1	0	GO Biological Processes	19	cellular calcium ion homeostasis	-2.79911	3.0956	3.81617	24155	459	170	10	5.88235	1.80462	348|719|4035|5021|5731|5739|6543|6781|7779|11151	APOE|C3AR1|LRP1|OXTR|PTGER1|PTGIR|SLC8A2|STC1|SLC30A1|CORO1A	-0.632726	0	11	0	0	-3.10605	3.55221
1	-2.77434	GO:0048545	M1	1	0	GO Biological Processes	19	response to steroid hormone	-2.77434	3.32154	3.86582	24155	385	170	9	5.29412	1.71736	1277|1978|2022|2104|2494|3148|5021|6781|10413	COL1A1|EIF4EBP1|ENG|ESRRG|NR5A2|HMGB2|OXTR|STC1|YAP1	-0.615156	0	10	0	0	-3.30061	4.80492
1	-2.74382	GO:0045787	M1	1	0	GO Biological Processes	19	positive regulation of cell cycle	-2.74382	3.28739	3.829	24155	389	170	9	5.29412	1.71736	891|1978|9493|9700|9787|10615|11113|81610|219736	CCNB1|EIF4EBP1|KIF23|ESPL1|DLGAP5|SPAG5|CIT|FAM83D|STOX1	-0.588571	0	14	0	0	-3.03136	15.2237
1	-2.72515	GO:0048872	M1	1	0	GO Biological Processes	19	homeostasis of number of cells	-2.72515	4.02679	4.0254	24155	247	170	7	4.11765	1.52395	3148|3718|4254|4856|5366|9935|11151	HMGB2|JAK3|KITLG|CCN3|PMAIP1|MAFB|CORO1A	-0.573795	0	19	1	1	-2.72515	11.5207
1	-2.71033	GO:0055074	M1	1	0	GO Biological Processes	19	calcium ion homeostasis	-2.71033	3.01034	3.7134	24155	472	170	10	5.88235	1.80462	348|719|4035|5021|5731|5739|6543|6781|7779|11151	APOE|C3AR1|LRP1|OXTR|PTGER1|PTGIR|SLC8A2|STC1|SLC30A1|CORO1A	-0.562832	0	11	0	0	-3.10605	3.55221
1	-2.70539	GO:0051321	M1	1	0	GO Biological Processes	19	meiotic cell cycle	-2.70539	3.99445	3.99864	24155	249	170	7	4.11765	1.52395	699|991|4751|5347|9700|10051|259266	BUB1|CDC20|NEK2|PLK1|ESPL1|SMC4|ASPM	-0.561718	0	1	0	0	-13.8149	22.2884
1	-2.65865	GO:1903046	M1	1	0	GO Biological Processes	19	meiotic cell cycle process	-2.65865	4.53473	4.09617	24155	188	170	6	3.52941	1.41522	699|991|5347|9700|10051|259266	BUB1|CDC20|PLK1|ESPL1|SMC4|ASPM	-0.518766	0	1	0	0	-13.8149	22.2884
1	-2.65127	GO:0043029	M1	1	0	GO Biological Processes	19	T cell homeostasis	-2.65127	11.5207	5.39166	24155	37	170	3	1.76471	1.00982	3718|5366|11151	JAK3|PMAIP1|CORO1A	-0.515151	0	19	0	0	-2.72515	11.5207
1	-2.58526	GO:0010874	M1	1	0	GO Biological Processes	19	regulation of cholesterol efflux	-2.58526	10.9299	5.22483	24155	39	170	3	1.76471	1.00982	348|4035|6721	APOE|LRP1|SREBF2	-0.452867	0	18	0	0	-2.80627	10.9299
1	-2.55617	GO:0006875	M1	1	0	GO Biological Processes	19	cellular metal ion homeostasis	-2.55617	2.69478	3.47816	24155	580	170	11	6.47059	1.88678	348|719|4035|4501|5021|5731|5739|6543|6781|7779|11151	APOE|C3AR1|LRP1|MT1X|OXTR|PTGER1|PTGIR|SLC8A2|STC1|SLC30A1|CORO1A	-0.427474	0	11	0	0	-3.10605	3.55221
1	-2.49323	GO:0006890	M1	1	0	GO Biological Processes	19	retrograde vesicle-mediated transport, Golgi to ER	-2.49323	6.60876	4.38668	24155	86	170	4	2.35294	1.16255	1062|9493|11004|24137	CENPE|KIF23|KIF2C|KIF4A	-0.371832	0	7	0	0	-4.55458	47.3627
1	-2.49323	GO:0001776	M1	1	0	GO Biological Processes	19	leukocyte homeostasis	-2.49323	6.60876	4.38668	24155	86	170	4	2.35294	1.16255	3718|4254|5366|11151	JAK3|KITLG|PMAIP1|CORO1A	-0.371832	0	19	0	0	-2.72515	11.5207
1	-2.48708	GO:0043062	M1	1	0	GO Biological Processes	19	extracellular structure organization	-2.48708	3.00893	3.5177	24155	425	170	9	5.29412	1.71736	348|1277|1288|2022|3687|4035|5352|8038|79875	APOE|COL1A1|COL4A6|ENG|ITGAX|LRP1|PLOD2|ADAM12|THSD4	-0.369289	0	20	1	1	-2.48708	4.9422
1	-2.46373	GO:0051293	M1	1	0	GO Biological Processes	19	establishment of spindle localization	-2.46373	9.91313	4.9249	24155	43	170	3	1.76471	1.00982	1058|5347|9700	CENPA|PLK1|ESPL1	-0.360062	0	4	0	0	-6.07932	13.6249
1	-2.46667	GO:0007610	M1	1	0	GO Biological Processes	19	behavior	-2.46667	2.62243	3.37645	24155	596	170	11	6.47059	1.88678	348|1979|4909|5021|6326|6543|6623|9379|51286|266977|283869	APOE|EIF4EBP2|NTF4|OXTR|SCN2A|SLC8A2|SNCG|NRXN2|CEND1|ADGRF1|NPW	-0.360062	0	6	0	0	-4.70848	8.50101
1	-2.47356	GO:0051588	M1	1	0	GO Biological Processes	19	regulation of neurotransmitter transport	-2.47356	5.00311	4.02779	24155	142	170	5	2.94118	1.29585	6623|7779|10675|23025|23204	SNCG|SLC30A1|CSPG5|UNC13A|ARL6IP1	-0.360062	0	21	1	1	-2.47356	5.46493
1	-2.46373	GO:0030866	M1	1	0	GO Biological Processes	19	cortical actin cytoskeleton organization	-2.46373	9.91313	4.9249	24155	43	170	3	1.76471	1.00982	9493|11113|644150	KIF23|CIT|WIPF3	-0.360062	0	22	1	1	-2.46373	9.91313
1	-2.45413	GO:0009101	M1	1	0	GO Biological Processes	19	glycoprotein biosynthetic process	-2.45413	3.23848	3.55656	24155	351	170	8	4.70588	1.62416	3718|4585|5352|10331|10675|144245|200958|728819	JAK3|MUC4|PLOD2|B3GNT3|CSPG5|ALG10B|MUC20|C1GALT1C1L	-0.353921	0	13	0	0	-3.04373	9.31726
1	-2.43529	GO:0034080	M1	1	0	GO Biological Processes	19	CENP-A containing nucleosome assembly	-2.43529	9.68783	4.85601	24155	44	170	3	1.76471	1.00982	1058|55355|387103	CENPA|HJURP|CENPW	-0.345302	0	3	0	0	-6.51948	35.5221
1	-2.43529	GO:0061641	M1	1	0	GO Biological Processes	19	CENP-A containing chromatin organization	-2.43529	9.68783	4.85601	24155	44	170	3	1.76471	1.00982	1058|55355|387103	CENPA|HJURP|CENPW	-0.345302	0	3	0	0	-6.51948	35.5221
1	-2.44154	GO:0050670	M1	1	0	GO Biological Processes	19	regulation of lymphocyte proliferation	-2.44154	4.0987	3.77863	24155	208	170	6	3.52941	1.41522	933|3718|11151|27242|64115|80380	CD22|JAK3|CORO1A|TNFRSF21|VSIR|PDCD1LG2	-0.345302	0	5	0	0	-5.17332	31.5752
1	-2.43137	GO:0032944	M1	1	0	GO Biological Processes	19	regulation of mononuclear cell proliferation	-2.43137	4.07909	3.76381	24155	209	170	6	3.52941	1.41522	933|3718|11151|27242|64115|80380	CD22|JAK3|CORO1A|TNFRSF21|VSIR|PDCD1LG2	-0.344736	0	5	0	0	-5.17332	31.5752
1	-2.42228	GO:0045132	M1	1	0	GO Biological Processes	19	meiotic chromosome segregation	-2.42228	6.31503	4.25288	24155	90	170	4	2.35294	1.16255	699|5347|9700|10051	BUB1|PLK1|ESPL1|SMC4	-0.342497	0	1	0	0	-13.8149	22.2884
1	-2.42126	GO:0006323	M1	1	0	GO Biological Processes	19	DNA packaging	-2.42126	4.05966	3.74908	24155	210	170	6	3.52941	1.41522	891|1058|3148|10051|55355|387103	CCNB1|CENPA|HMGB2|SMC4|HJURP|CENPW	-0.342497	0	3	0	0	-6.51948	35.5221
1	-2.41597	GO:0071900	M1	1	0	GO Biological Processes	19	regulation of protein serine/threonine kinase activity	-2.41597	2.73773	3.36921	24155	519	170	10	5.88235	1.80462	348|890|891|1030|1033|1850|4254|5347|128239|200958	APOE|CCNA2|CCNB1|CDKN2B|CDKN3|DUSP8|KITLG|PLK1|IQGAP3|MUC20	-0.342497	0	8	0	0	-3.97426	8.04273
1	-2.41723	GO:0031589	M1	1	0	GO Biological Processes	19	cell-substrate adhesion	-2.41723	3.19299	3.50939	24155	356	170	8	4.70588	1.62416	1277|4035|4585|10085|10675|11151|54749|126147	COL1A1|LRP1|MUC4|EDIL3|CSPG5|CORO1A|EPDR1|NTN5	-0.342497	0	23	1	1	-2.41723	3.19299
1	-2.40511	GO:0001578	M1	1	0	GO Biological Processes	19	microtubule bundle formation	-2.40511	6.24564	4.2207	24155	91	170	4	2.35294	1.16255	5347|9055|10112|51364	PLK1|PRC1|KIF20A|ZMYND10	-0.33807	0	4	0	0	-6.07932	13.6249
1	-2.40511	GO:1901992	M1	1	0	GO Biological Processes	19	positive regulation of mitotic cell cycle phase transition	-2.40511	6.24564	4.2207	24155	91	170	4	2.35294	1.16255	891|9700|9787|219736	CCNB1|ESPL1|DLGAP5|STOX1	-0.33807	0	14	0	0	-3.03136	15.2237
1	-2.39543	GO:0001666	M1	1	0	GO Biological Processes	19	response to hypoxia	-2.39543	3.16631	3.48149	24155	359	170	8	4.70588	1.62416	890|891|1978|5352|5366|6326|6781|219736	CCNA2|CCNB1|EIF4EBP1|PLOD2|PMAIP1|SCN2A|STC1|STOX1	-0.331576	0	10	0	0	-3.30061	4.80492
1	-2.39121	GO:0071396	M1	1	0	GO Biological Processes	19	cellular response to lipid	-2.39121	2.56225	3.29014	24155	610	170	11	6.47059	1.88678	890|891|1277|1978|2104|2494|3148|6781|10413|23209|80380	CCNA2|CCNB1|COL1A1|EIF4EBP1|ESRRG|NR5A2|HMGB2|STC1|YAP1|MLC1|PDCD1LG2	-0.331226	0	10	0	0	-3.30061	4.80492
1	-2.38879	GO:0019932	M1	1	0	GO Biological Processes	19	second-messenger-mediated signaling	-2.38879	2.90635	3.39756	24155	440	170	9	5.29412	1.71736	348|933|1979|2494|2983|5731|5739|9289|266977	APOE|CD22|EIF4EBP2|NR5A2|GUCY1B1|PTGER1|PTGIR|ADGRG1|ADGRF1	-0.331226	0	12	0	0	-3.05978	4.60471
1	-2.38104	GO:0010948	M1	1	0	GO Biological Processes	19	negative regulation of cell cycle process	-2.38104	3.14877	3.46305	24155	361	170	8	4.70588	1.62416	699|891|991|1030|1063|4751|5347|9700	BUB1|CCNB1|CDC20|CDKN2B|CENPF|NEK2|PLK1|ESPL1	-0.326586	0	1	0	0	-13.8149	22.2884
1	-2.36187	GO:0000075	M1	1	0	GO Biological Processes	19	cell cycle checkpoint	-2.36187	3.9469	3.66259	24155	216	170	6	3.52941	1.41522	699|891|991|1030|1063|5347	BUB1|CCNB1|CDC20|CDKN2B|CENPF|PLK1	-0.31051	0	1	0	0	-13.8149	22.2884
1	-2.34551	GO:0030111	M1	1	0	GO Biological Processes	19	regulation of Wnt signaling pathway	-2.34551	3.10575	3.41751	24155	366	170	8	4.70588	1.62416	348|1277|4035|10413|55789|144165|147906|259266	APOE|COL1A1|LRP1|YAP1|DEPDC1B|PRICKLE1|DACT3|ASPM	-0.297223	0	18	0	0	-2.80627	10.9299
1	-2.33854	GO:0044070	M1	1	0	GO Biological Processes	19	regulation of anion transport	-2.33854	5.98266	4.09661	24155	95	170	4	2.35294	1.16255	348|6781|23204|338440	APOE|STC1|ARL6IP1|ANO9	-0.296329	0	16	0	0	-2.84471	5.98266
1	-2.33854	GO:0051952	M1	1	0	GO Biological Processes	19	regulation of amine transport	-2.33854	5.98266	4.09661	24155	95	170	4	2.35294	1.16255	5021|6623|23204|84258	OXTR|SNCG|ARL6IP1|SYT3	-0.296329	0	24	1	1	-2.33854	6.87524
1	-2.32827	GO:0031055	M1	1	0	GO Biological Processes	19	chromatin remodeling at centromere	-2.32827	8.88051	4.60101	24155	48	170	3	1.76471	1.00982	1058|55355|387103	CENPA|HJURP|CENPW	-0.292046	0	3	0	0	-6.51948	35.5221
1	-2.32827	GO:0030865	M1	1	0	GO Biological Processes	19	cortical cytoskeleton organization	-2.32827	8.88051	4.60101	24155	48	170	3	1.76471	1.00982	9493|11113|644150	KIF23|CIT|WIPF3	-0.292046	0	22	0	0	-2.46373	9.91313
1	-2.31757	GO:0030198	M1	1	0	GO Biological Processes	19	extracellular matrix organization	-2.31757	3.07218	3.38163	24155	370	170	8	4.70588	1.62416	1277|1288|2022|3687|4035|5352|8038|79875	COL1A1|COL4A6|ENG|ITGAX|LRP1|PLOD2|ADAM12|THSD4	-0.284306	0	20	0	0	-2.48708	4.9422
1	-2.30058	GO:0042129	M1	1	0	GO Biological Processes	19	regulation of T cell proliferation	-2.30058	4.55411	3.74926	24155	156	170	5	2.94118	1.29585	3718|11151|27242|64115|80380	JAK3|CORO1A|TNFRSF21|VSIR|PDCD1LG2	-0.270261	0	5	0	0	-5.17332	31.5752
1	-2.29099	GO:0051962	M1	1	0	GO Biological Processes	19	positive regulation of nervous system development	-2.29099	2.6264	3.221	24155	541	170	10	5.88235	1.80462	348|991|1272|3687|4035|5021|23025|84258|94030|259266	APOE|CDC20|CNTN1|ITGAX|LRP1|OXTR|UNC13A|SYT3|LRRC4B|ASPM	-0.266232	0	6	0	0	-4.70848	8.50101
1	-2.29072	GO:0019886	M1	1	0	GO Biological Processes	19	antigen processing and presentation of exogenous peptide antigen via MHC class II	-2.29072	5.79952	4.00811	24155	98	170	4	2.35294	1.16255	1062|9493|11004|24137	CENPE|KIF23|KIF2C|KIF4A	-0.266232	0	7	0	0	-4.55458	47.3627
1	-2.27672	GO:0044843	M1	1	0	GO Biological Processes	19	cell cycle G1/S phase transition	-2.27672	3.33764	3.41844	24155	298	170	7	4.11765	1.52395	890|891|1030|1033|1978|81610|128239	CCNA2|CCNB1|CDKN2B|CDKN3|EIF4EBP1|FAM83D|IQGAP3	-0.255118	0	8	0	0	-3.97426	8.04273
1	-2.26121	GO:0070661	M1	1	0	GO Biological Processes	19	leukocyte proliferation	-2.26121	3.31539	3.39738	24155	300	170	7	4.11765	1.52395	933|3718|4254|11151|27242|64115|80380	CD22|JAK3|KITLG|CORO1A|TNFRSF21|VSIR|PDCD1LG2	-0.243885	0	5	0	0	-5.17332	31.5752
1	-2.25977	GO:0060840	M1	1	0	GO Biological Processes	19	artery development	-2.25977	5.68353	3.95112	24155	100	170	4	2.35294	1.16255	348|2022|4035|144165	APOE|ENG|LRP1|PRICKLE1	-0.243885	0	18	0	0	-2.80627	10.9299
1	-2.2543	GO:0097366	M1	1	0	GO Biological Processes	19	response to bronchodilator	-2.2543	8.35813	4.42851	24155	51	170	3	1.76471	1.00982	890|2983|5021	CCNA2|GUCY1B1|OXTR	-0.241247	0	25	1	1	-2.2543	8.35813
1	-2.24457	GO:0002495	M1	1	0	GO Biological Processes	19	antigen processing and presentation of peptide antigen via MHC class II	-2.24457	5.62726	3.92319	24155	101	170	4	2.35294	1.16255	1062|9493|11004|24137	CENPE|KIF23|KIF2C|KIF4A	-0.234322	0	7	0	0	-4.55458	47.3627
1	-2.23072	GO:0035176	M1	1	0	GO Biological Processes	19	social behavior	-2.23072	8.1974	4.37412	24155	52	170	3	1.76471	1.00982	1979|5021|9379	EIF4EBP2|OXTR|NRXN2	-0.233081	0	6	0	0	-4.70848	8.50101
1	-2.23072	GO:0051703	M1	1	0	GO Biological Processes	19	intraspecies interaction between organisms	-2.23072	8.1974	4.37412	24155	52	170	3	1.76471	1.00982	1979|5021|9379	EIF4EBP2|OXTR|NRXN2	-0.233081	0	6	0	0	-4.70848	8.50101
1	-2.22954	GO:0002504	M1	1	0	GO Biological Processes	19	antigen processing and presentation of peptide or polysaccharide antigen via MHC class II	-2.22954	5.57209	3.89564	24155	102	170	4	2.35294	1.16255	1062|9493|11004|24137	CENPE|KIF23|KIF2C|KIF4A	-0.233081	0	7	0	0	-4.55458	47.3627
1	-2.22954	GO:0015837	M1	1	0	GO Biological Processes	19	amine transport	-2.22954	5.57209	3.89564	24155	102	170	4	2.35294	1.16255	5021|6623|23204|84258	OXTR|SNCG|ARL6IP1|SYT3	-0.233081	0	24	0	0	-2.33854	6.87524
1	-2.23072	GO:0048168	M1	1	0	GO Biological Processes	19	regulation of neuronal synaptic plasticity	-2.23072	8.1974	4.37412	24155	52	170	3	1.76471	1.00982	348|6543|23025	APOE|SLC8A2|UNC13A	-0.233081	0	26	1	1	-2.23072	8.1974
1	-2.22101	GO:0045931	M1	1	0	GO Biological Processes	19	positive regulation of mitotic cell cycle	-2.22101	4.35853	3.62209	24155	163	170	5	2.94118	1.29585	891|1978|9700|9787|219736	CCNB1|EIF4EBP1|ESPL1|DLGAP5|STOX1	-0.227259	0	14	0	0	-3.03136	15.2237
1	-2.19999	GO:0046928	M1	1	0	GO Biological Processes	19	regulation of neurotransmitter secretion	-2.19999	5.46493	3.84162	24155	104	170	4	2.35294	1.16255	6623|7779|10675|23025	SNCG|SLC30A1|CSPG5|UNC13A	-0.20893	0	21	0	0	-2.47356	5.46493
1	-2.19677	GO:0050678	M1	1	0	GO Biological Processes	19	regulation of epithelial cell proliferation	-2.19677	2.92965	3.22595	24155	388	170	8	4.70588	1.62416	348|1030|1893|3148|5828|10413|128239|219736	APOE|CDKN2B|ECM1|HMGB2|PEX2|YAP1|IQGAP3|STOX1	-0.208378	0	15	0	0	-2.89142	3.18583
1	-2.18503	GO:0006336	M1	1	0	GO Biological Processes	19	DNA replication-independent nucleosome assembly	-2.18503	7.89379	4.26959	24155	54	170	3	1.76471	1.00982	1058|55355|387103	CENPA|HJURP|CENPW	-0.1993	0	3	0	0	-6.51948	35.5221
1	-2.17484	GO:0030003	M1	1	0	GO Biological Processes	19	cellular cation homeostasis	-2.17484	2.39352	3.03926	24155	653	170	11	6.47059	1.88678	348|719|4035|4501|5021|5731|5739|6543|6781|7779|11151	APOE|C3AR1|LRP1|MT1X|OXTR|PTGER1|PTGIR|SLC8A2|STC1|SLC30A1|CORO1A	-0.191751	0	11	0	0	-3.10605	3.55221
1	-2.17007	GO:0055065	M1	1	0	GO Biological Processes	19	metal ion homeostasis	-2.17007	2.38986	3.03366	24155	654	170	11	6.47059	1.88678	348|719|4035|4501|5021|5731|5739|6543|6781|7779|11151	APOE|C3AR1|LRP1|MT1X|OXTR|PTGER1|PTGIR|SLC8A2|STC1|SLC30A1|CORO1A	-0.189603	0	11	0	0	-3.10605	3.55221
1	-2.16289	GO:0034724	M1	1	0	GO Biological Processes	19	DNA replication-independent nucleosome organization	-2.16289	7.75027	4.21932	24155	55	170	3	1.76471	1.00982	1058|55355|387103	CENPA|HJURP|CENPW	-0.185033	0	3	0	0	-6.51948	35.5221
1	-2.15187	GO:0010639	M1	1	0	GO Biological Processes	19	negative regulation of organelle organization	-2.15187	2.87774	3.16781	24155	395	170	8	4.70588	1.62416	699|891|991|1063|4751|5347|9700|11151	BUB1|CCNB1|CDC20|CENPF|NEK2|PLK1|ESPL1|CORO1A	-0.179179	0	1	0	0	-13.8149	22.2884
1	-2.15222	GO:0033002	M1	1	0	GO Biological Processes	19	muscle cell proliferation	-2.15222	3.56707	3.3577	24155	239	170	6	3.52941	1.41522	891|1264|3486|4856|5739|10413	CCNB1|CNN1|IGFBP3|CCN3|PTGIR|YAP1	-0.179179	0	27	1	1	-2.15222	3.86109
1	-2.1437	GO:0051048	M1	1	0	GO Biological Processes	19	negative regulation of secretion	-2.1437	3.55221	3.3453	24155	240	170	6	3.52941	1.41522	348|933|4856|5021|7779|27242	APOE|CD22|CCN3|OXTR|SLC30A1|TNFRSF21	-0.176117	0	11	0	0	-3.10605	3.55221
1	-2.14553	GO:0007269	M1	1	0	GO Biological Processes	19	neurotransmitter secretion	-2.14553	4.17907	3.5019	24155	170	170	5	2.94118	1.29585	6623|7779|9379|10675|23025	SNCG|SLC30A1|NRXN2|CSPG5|UNC13A	-0.176117	0	21	0	0	-2.47356	5.46493
1	-2.13507	GO:0099643	M1	1	0	GO Biological Processes	19	signal release from synapse	-2.13507	4.15463	3.48525	24155	171	170	5	2.94118	1.29585	6623|7779|9379|10675|23025	SNCG|SLC30A1|NRXN2|CSPG5|UNC13A	-0.170017	0	21	0	0	-2.47356	5.46493
1	-2.11994	GO:0033344	M1	1	0	GO Biological Processes	19	cholesterol efflux	-2.11994	7.47833	4.12248	24155	57	170	3	1.76471	1.00982	348|4035|6721	APOE|LRP1|SREBF2	-0.157408	0	18	0	0	-2.80627	10.9299
1	-2.11367	GO:0006873	M1	1	0	GO Biological Processes	19	cellular ion homeostasis	-2.11367	2.3468	2.96728	24155	666	170	11	6.47059	1.88678	348|719|4035|4501|5021|5731|5739|6543|6781|7779|11151	APOE|C3AR1|LRP1|MT1X|OXTR|PTGER1|PTGIR|SLC8A2|STC1|SLC30A1|CORO1A	-0.153641	0	11	0	0	-3.10605	3.55221
1	-2.10411	GO:2001252	M1	1	0	GO Biological Processes	19	positive regulation of chromosome organization	-2.10411	4.083	3.43608	24155	174	170	5	2.94118	1.29585	891|4751|9700|9787|59335	CCNB1|NEK2|ESPL1|DLGAP5|PRDM12	-0.149046	0	14	0	0	-3.03136	15.2237
1	-2.10464	GO:0001568	M1	1	0	GO Biological Processes	19	blood vessel development	-2.10464	2.23761	2.92259	24155	762	170	12	7.05882	1.96447	348|719|1277|1893|2022|3687|4035|4856|8038|9289|10413|144165	APOE|C3AR1|COL1A1|ECM1|ENG|ITGAX|LRP1|CCN3|ADAM12|ADGRG1|YAP1|PRICKLE1	-0.149046	0	20	0	0	-2.48708	4.9422
1	-2.09909	GO:0035904	M1	1	0	GO Biological Processes	19	aorta development	-2.09909	7.34939	4.07581	24155	58	170	3	1.76471	1.00982	2022|4035|144165	ENG|LRP1|PRICKLE1	-0.148935	0	18	0	0	-2.80627	10.9299
1	-2.09909	GO:1902041	M1	1	0	GO Biological Processes	19	regulation of extrinsic apoptotic signaling pathway via death domain receptors	-2.09909	7.34939	4.07581	24155	58	170	3	1.76471	1.00982	467|3148|5366	ATF3|HMGB2|PMAIP1	-0.148935	0	19	0	0	-2.72515	11.5207
1	-2.08816	GO:0050868	M1	1	0	GO Biological Processes	19	negative regulation of T cell activation	-2.08816	5.07458	3.6387	24155	112	170	4	2.35294	1.16255	3718|27242|64115|80380	JAK3|TNFRSF21|VSIR|PDCD1LG2	-0.140435	0	5	0	0	-5.17332	31.5752
1	-2.07714	GO:1901991	M1	1	0	GO Biological Processes	19	negative regulation of mitotic cell cycle phase transition	-2.07714	3.43762	3.24846	24155	248	170	6	3.52941	1.41522	699|891|991|1030|1063|5347	BUB1|CCNB1|CDC20|CDKN2B|CENPF|PLK1	-0.136634	0	1	0	0	-13.8149	22.2884
1	-2.07714	GO:0065004	M1	1	0	GO Biological Processes	19	protein-DNA complex assembly	-2.07714	3.43762	3.24846	24155	248	170	6	3.52941	1.41522	1058|1062|1063|3148|55355|387103	CENPA|CENPE|CENPF|HMGB2|HJURP|CENPW	-0.136634	0	3	0	0	-6.51948	35.5221
1	-2.07865	GO:0042130	M1	1	0	GO Biological Processes	19	negative regulation of T cell proliferation	-2.07865	7.22483	4.03023	24155	59	170	3	1.76471	1.00982	27242|64115|80380	TNFRSF21|VSIR|PDCD1LG2	-0.136634	0	5	0	0	-5.17332	31.5752
1	-2.07138	GO:0050808	M1	1	0	GO Biological Processes	19	synapse organization	-2.07138	2.78604	3.06314	24155	408	170	8	4.70588	1.62416	348|991|5021|6623|9379|23025|94030|266977	APOE|CDC20|OXTR|SNCG|NRXN2|UNC13A|LRRC4B|ADGRF1	-0.133254	0	6	0	0	-4.70848	8.50101
1	-2.0645	GO:0071103	M1	1	0	GO Biological Processes	19	DNA conformation change	-2.0645	3.04164	3.12939	24155	327	170	7	4.11765	1.52395	891|1058|3148|10051|55355|165545|387103	CCNB1|CENPA|HMGB2|SMC4|HJURP|DQX1|CENPW	-0.128739	0	3	0	0	-6.51948	35.5221
1	-2.05859	GO:0043486	M1	1	0	GO Biological Processes	19	histone exchange	-2.05859	7.10441	3.9857	24155	60	170	3	1.76471	1.00982	1058|55355|387103	CENPA|HJURP|CENPW	-0.125181	0	3	0	0	-6.51948	35.5221
1	-2.04864	GO:0032963	M1	1	0	GO Biological Processes	19	collagen metabolic process	-2.04864	4.9422	3.56754	24155	115	170	4	2.35294	1.16255	1277|2022|5352|64115	COL1A1|ENG|PLOD2|VSIR	-0.117573	0	20	0	0	-2.48708	4.9422
1	-2.04399	GO:0031667	M1	1	0	GO Biological Processes	19	response to nutrient levels	-2.04399	2.56271	2.96967	24155	499	170	9	5.29412	1.71736	348|467|1030|1277|1978|5366|6721|6781|7425	APOE|ATF3|CDKN2B|COL1A1|EIF4EBP1|PMAIP1|SREBF2|STC1|VGF	-0.115257	0	10	0	0	-3.30061	4.80492
1	-2.04088	GO:0040008	M1	1	0	GO Biological Processes	19	regulation of growth	-2.04088	2.29175	2.88094	24155	682	170	11	6.47059	1.88678	348|891|3486|4035|4501|4856|10413|10675|23025|84258|147906	APOE|CCNB1|IGFBP3|LRP1|MT1X|CCN3|YAP1|CSPG5|UNC13A|SYT3|DACT3	-0.114459	0	27	0	0	-2.15222	3.86109
1	-2.03573	GO:0021987	M1	1	0	GO Biological Processes	19	cerebral cortex development	-2.03573	4.89959	3.54437	24155	116	170	4	2.35294	1.16255	3362|4035|9289|259266	HTR6|LRP1|ADGRG1|ASPM	-0.111619	0	28	1	1	-2.03573	4.89959
1	-2.01958	GO:0002260	M1	1	0	GO Biological Processes	19	lymphocyte homeostasis	-2.01958	6.87524	3.89964	24155	62	170	3	1.76471	1.00982	3718|5366|11151	JAK3|PMAIP1|CORO1A	-0.102299	0	19	0	0	-2.72515	11.5207
1	-2.01958	GO:0050433	M1	1	0	GO Biological Processes	19	regulation of catecholamine secretion	-2.01958	6.87524	3.89964	24155	62	170	3	1.76471	1.00982	5021|6623|84258	OXTR|SNCG|SYT3	-0.102299	0	24	0	0	-2.33854	6.87524
1	-2.02296	GO:0031398	M1	1	0	GO Biological Processes	19	positive regulation of protein ubiquitination	-2.02296	4.85772	3.52146	24155	117	170	4	2.35294	1.16255	330|991|5347|144165	BIRC3|CDC20|PLK1|PRICKLE1	-0.102299	0	29	1	1	-2.02296	4.85772
1	-2.01707	GO:0030336	M1	1	0	GO Biological Processes	19	negative regulation of cell migration	-2.01707	2.9779	3.0644	24155	334	170	7	4.11765	1.52395	348|2022|3486|4035|4856|6781|9289	APOE|ENG|IGFBP3|LRP1|CCN3|STC1|ADGRG1	-0.102048	0	18	0	0	-2.80627	10.9299
1	-2.00555	GO:0048639	M1	1	0	GO Biological Processes	19	positive regulation of developmental growth	-2.00555	3.86109	3.2798	24155	184	170	5	2.94118	1.29585	891|4035|10413|23025|84258	CCNB1|LRP1|YAP1|UNC13A|SYT3	-0.0927723	0	27	0	0	-2.15222	3.86109
1	-2.0006	GO:0032371	M1	1	0	GO Biological Processes	19	regulation of sterol transport	-2.0006	6.76611	3.85803	24155	63	170	3	1.76471	1.00982	348|4035|6721	APOE|LRP1|SREBF2	-0.0922792	0	18	0	0	-2.80627	10.9299
1	-2.0006	GO:0032374	M1	1	0	GO Biological Processes	19	regulation of cholesterol transport	-2.0006	6.76611	3.85803	24155	63	170	3	1.76471	1.00982	348|4035|6721	APOE|LRP1|SREBF2	-0.0922792	0	18	0	0	-2.80627	10.9299
