# Supplementary material for: A Division of Labor between YAP and TAZ in Non–Small Cell Lung Cancer
Source: Oxford University Press journal article supplement (doi:10.1158/0008-5472.can-20-0125), 2020-08-14
Supplement: 00085472can200125-sup-235469_2_supp_6451213_q6jr2t.xlsx [file 00085472can200125-sup-235469_2_supp_6451213_q6jr2t.xlsx]

## Sheet: TAZ-correlated
_MEMBER_Input ID	_LogP_Input ID	GO	_PATTERN_	_RANK_	GiniIndex	Category	CategoryID	Description	LogP	Enrichment	Z-score	#TotalGeneInLibrary	#GeneInGO	#GeneInHitList	#GeneInGOAndHitList	%InGO	STDV %InGO	GeneID	Hits	Log(q-value)	EvidenceCutoff	GROUP_ID	FirstInGroupByEnrichment	FirstInGroupByLogP	BestLogPInGroup	BestEnrichmentInGroup	URL
1	-8.54717	GO:0048514	M1	1	0	GO Biological Processes	19	blood vessel morphogenesis	-8.54717	2.07671	6.64927	24155	682	1245	73	5.86345	0.665842	182|857|1281|1282|1306|1386|1464|1901|1909|1944|1948|2048|2113|2246|2321|2335|2683|3091|3373|3685|3690|3949|4015|4035|4162|4323|4627|4638|5054|5156|5159|5168|5290|5291|5294|5469|6093|6678|6733|6774|7010|7045|7057|7716|8434|8828|8829|9353|9444|10000|10016|10052|10203|10413|10519|10672|23414|23670|25932|25960|25976|28996|55742|57381|57493|57608|79812|80155|81575|91355|92140|93974|147372	JAG1|CAV1|COL3A1|COL4A1|COL15A1|ATF2|CSPG4|S1PR1|EDNRA|EFNA3|EFNB2|EPHB2|ETS1|FGF1|FLT1|FN1|B4GALT1|HIF1A|HYAL1|ITGAV|ITGB3|LDLR|LOX|LRP1|MCAM|MMP14|MYH9|MYLK|SERPINE1|PDGFRA|PDGFRB|ENPP2|PIK3CA|PIK3CB|PIK3CG|MED1|ROCK1|SPARC|SRPK2|STAT3|TEK|TGFBI|THBS1|VEZF1|RECK|NRP2|NRP1|SLIT2|QKI|AKT3|PDCD6|GJC1|CALCRL|YAP1|CIB1|GNA13|ZFPM2|CEMIP2|CLIC4|ADGRA2|TIPARP|HIPK2|PARVA|RHOJ|HEG1|JCAD|MMRN2|NAA15|APO…	-4.34659	0	1	1	1	-8.54717	2.5568
1	-7.79849	GO:0001944	M1	1	0	GO Biological Processes	19	vasculature development	-7.79849	1.93282	6.22654	24155	793	1245	79	6.34538	0.69089	102|182|857|1281|1282|1306|1386|1464|1901|1909|1944|1948|2048|2113|2246|2321|2335|2683|3091|3373|3685|3690|3949|4015|4035|4162|4323|4627|4638|4773|5054|5125|5156|5159|5168|5290|5291|5294|5469|6093|6443|6678|6733|6774|7010|7045|7057|7716|8434|8828|8829|9353|9444|10000|10016|10052|10203|10413|10519|10672|23414|23670|25932|25960|25976|28996|55742|55897|57381|57493|57608|79812|80155|81575|84168|91355…	ADAM10|JAG1|CAV1|COL3A1|COL4A1|COL15A1|ATF2|CSPG4|S1PR1|EDNRA|EFNA3|EFNB2|EPHB2|ETS1|FGF1|FLT1|FN1|B4GALT1|HIF1A|HYAL1|ITGAV|ITGB3|LDLR|LOX|LRP1|MCAM|MMP14|MYH9|MYLK|NFATC2|SERPINE1|PCSK5|PDGFRA|PDGFRB|ENPP2|PIK3CA|PIK3CB|PIK3CG|MED1|ROCK1|SGCB|SPARC|SRPK2|STAT3|TEK|TGFBI|THBS1|VEZF1|RECK|NRP2|NRP1|SLIT2|QKI|AKT3|PDCD6|GJC1|CALCRL|YAP1|CIB1|GNA13|ZFPM2|CEMIP2|CLIC4|ADGRA2|TIPARP|HIPK2|PARVA|MESP1…	-3.91054	0	1	0	0	-8.54717	2.5568
1	-7.5444	GO:0001568	M1	1	0	GO Biological Processes	19	blood vessel development	-7.5444	1.93507	6.11427	24155	762	1245	76	6.10442	0.678516	182|857|1281|1282|1306|1386|1464|1901|1909|1944|1948|2048|2113|2246|2321|2335|2683|3091|3373|3685|3690|3949|4015|4035|4162|4323|4627|4638|5054|5125|5156|5159|5168|5290|5291|5294|5469|6093|6678|6733|6774|7010|7045|7057|7716|8434|8828|8829|9353|9444|10000|10016|10052|10203|10413|10519|10672|23414|23670|25932|25960|25976|28996|55742|55897|57381|57493|57608|79812|80155|81575|84168|91355|92140|93974|1…	JAG1|CAV1|COL3A1|COL4A1|COL15A1|ATF2|CSPG4|S1PR1|EDNRA|EFNA3|EFNB2|EPHB2|ETS1|FGF1|FLT1|FN1|B4GALT1|HIF1A|HYAL1|ITGAV|ITGB3|LDLR|LOX|LRP1|MCAM|MMP14|MYH9|MYLK|SERPINE1|PCSK5|PDGFRA|PDGFRB|ENPP2|PIK3CA|PIK3CB|PIK3CG|MED1|ROCK1|SPARC|SRPK2|STAT3|TEK|TGFBI|THBS1|VEZF1|RECK|NRP2|NRP1|SLIT2|QKI|AKT3|PDCD6|GJC1|CALCRL|YAP1|CIB1|GNA13|ZFPM2|CEMIP2|CLIC4|ADGRA2|TIPARP|HIPK2|PARVA|MESP1|RHOJ|HEG1|JCAD|MMR…	-3.91054	0	1	0	0	-8.54717	2.5568
1	-7.50906	GO:0007169	M1	1	0	GO Biological Processes	19	transmembrane receptor protein tyrosine kinase signaling pathway	-7.50906	1.96166	6.11564	24155	722	1245	73	5.86345	0.665842	367|523|1282|1398|1436|1464|1944|1948|2048|2241|2246|2321|2932|3084|3091|3482|3672|3685|3690|3717|4015|4035|4485|4690|4919|4921|4976|5062|5156|5159|5290|5291|5295|5781|6093|6259|6774|6868|7010|7057|7879|8822|8828|8829|9252|10016|10019|10097|10256|10312|10787|22853|23064|23191|23768|25960|25970|25976|26037|26060|27246|29990|30011|51552|57608|79812|81792|84619|114882|118813|130617|147372|245973	AR|ATP6V1A|COL4A1|CRK|CSF1R|CSPG4|EFNA3|EFNB2|EPHB2|FER|FGF1|FLT1|GSK3B|NRG1|HIF1A|IGF2R|ITGA1|ITGAV|ITGB3|JAK2|LOX|LRP1|MST1|NCK1|ROR1|DDR2|OPA1|PAK2|PDGFRA|PDGFRB|PIK3CA|PIK3CB|PIK3R1|PTPN11|ROCK1|RYK|STAT3|ADAM17|TEK|THBS1|RAB7A|FGF17|NRP2|NRP1|RPS6KA5|PDCD6|SH2B3|ACTR2|CNKSR1|TCIRG1|NCKAP1|LMTK2|SETX|CYFIP1|FLRT2|ADGRA2|SH2B1|TIPARP|SIPA1L1|APPL1|RNF115|PILRB|SH3KBP1|RAB14|JCAD|MMRN2|ADAMTS12…	-3.91054	0	2	1	1	-7.50906	1.96166
1	-7.12019	GO:0031589	M1	1	0	GO Biological Processes	19	cell-substrate adhesion	-7.12019	2.39795	6.19447	24155	356	1245	44	3.53414	0.523292	87|182|960|1281|1398|1842|2241|2335|2932|3672|3676|3685|3690|3693|3717|4035|4241|4323|4811|4921|5054|5291|5295|5796|6093|7010|7057|8324|8516|8754|8829|10085|10519|10631|10894|10979|11149|23603|55742|79778|79812|81792|84168|151887	ACTN1|JAG1|CD44|COL3A1|CRK|ECM2|FER|FN1|GSK3B|ITGA1|ITGA4|ITGAV|ITGB3|ITGB5|JAK2|LRP1|MELTF|MMP14|NID1|DDR2|SERPINE1|PIK3CB|PIK3R1|PTPRK|ROCK1|TEK|THBS1|FZD7|ITGA8|ADAM9|NRP1|EDIL3|CIB1|POSTN|LYVE1|FERMT2|BVES|CORO1C|PARVA|MICALL2|MMRN2|ADAMTS12|ANTXR1|CCDC80	-3.61858	0	3	1	1	-7.12019	2.74713
1	-6.96216	GO:0000904	M1	1	0	GO Biological Processes	19	cell morphogenesis involved in differentiation	-6.96216	1.9011	5.82392	24155	745	1245	73	5.86345	0.665842	87|102|367|842|1009|1293|1385|1398|1436|1944|1948|2048|2241|2335|2932|3274|3676|3685|3690|4035|4131|4241|4627|4976|5048|5290|5291|5295|5781|6093|6259|6498|6586|6711|7010|7204|8324|8516|8609|8633|8828|8829|9113|9252|9334|9353|9839|10097|10154|10519|10631|10979|11149|11313|23022|23191|23603|23768|26037|30011|50944|51199|55742|57493|79778|84168|91584|91624|113246|118813|122786|170506|200894	ACTN1|ADAM10|AR|CASP9|CDH11|COL6A3|CREB1|CRK|CSF1R|EFNA3|EFNB2|EPHB2|FER|FN1|GSK3B|HRH2|ITGA4|ITGAV|ITGB3|LRP1|MAP1B|MELTF|MYH9|OPA1|PAFAH1B1|PIK3CA|PIK3CB|PIK3R1|PTPN11|ROCK1|RYK|SKIL|SLIT3|SPTBN1|TEK|TRIO|FZD7|ITGA8|KLF7|UNC5C|NRP2|NRP1|LATS1|RPS6KA5|B4GALT5|SLIT2|ZEB2|ACTR2|PLXNC1|CIB1|POSTN|FERMT2|BVES|LYPLA2|PALLD|CYFIP1|CORO1C|FLRT2|SIPA1L1|SH3KBP1|SHANK1|NIN|PARVA|HEG1|MICALL2|ANTXR1|PLXNA…	-3.53973	0	2	0	0	-7.50906	1.96166
1	-6.75765	GO:0001525	M1	1	0	GO Biological Processes	19	angiogenesis	-6.75765	2.01275	5.7957	24155	588	1245	61	4.8996	0.611768	182|857|1282|1306|1386|1464|1901|1909|1944|1948|2048|2113|2246|2321|2335|2683|3091|3373|3685|3690|4162|4323|4627|5054|5156|5159|5168|5290|5291|5294|5469|6093|6678|6733|6774|7010|7045|7057|7716|8434|8828|8829|9353|10000|10016|10203|10519|10672|23670|25932|25960|28996|55742|57381|57608|79812|80155|81575|92140|93974|147372	JAG1|CAV1|COL4A1|COL15A1|ATF2|CSPG4|S1PR1|EDNRA|EFNA3|EFNB2|EPHB2|ETS1|FGF1|FLT1|FN1|B4GALT1|HIF1A|HYAL1|ITGAV|ITGB3|MCAM|MMP14|MYH9|SERPINE1|PDGFRA|PDGFRB|ENPP2|PIK3CA|PIK3CB|PIK3CG|MED1|ROCK1|SPARC|SRPK2|STAT3|TEK|TGFBI|THBS1|VEZF1|RECK|NRP2|NRP1|SLIT2|AKT3|PDCD6|CALCRL|CIB1|GNA13|CEMIP2|CLIC4|ADGRA2|HIPK2|PARVA|RHOJ|JCAD|MMRN2|NAA15|APOLD1|MTDH|ATP5IF1|CCBE1	-3.40218	0	1	0	0	-8.54717	2.5568
1	-6.67	GO:0007160	M1	1	0	GO Biological Processes	19	cell-matrix adhesion	-6.67	2.74713	6.15154	24155	226	1245	32	2.57028	0.448489	87|182|960|1281|1842|2335|2932|3672|3676|3685|3690|3693|4035|4323|4811|4921|5054|5291|5295|5796|6093|7010|7057|8516|8754|8829|10519|10631|10894|10979|23603|81792	ACTN1|JAG1|CD44|COL3A1|ECM2|FN1|GSK3B|ITGA1|ITGA4|ITGAV|ITGB3|ITGB5|LRP1|MMP14|NID1|DDR2|SERPINE1|PIK3CB|PIK3R1|PTPRK|ROCK1|TEK|THBS1|ITGA8|ADAM9|NRP1|CIB1|POSTN|LYVE1|FERMT2|CORO1C|ADAMTS12	-3.37252	0	3	0	0	-7.12019	2.74713
1	-6.57493	GO:2000147	M1	1	0	GO Biological Processes	19	positive regulation of cell motility	-6.57493	2.01531	5.70824	24155	568	1245	59	4.73896	0.602163	102|382|857|1398|1436|1901|2113|2149|2241|2246|2321|2335|2358|3091|3373|3676|3685|3690|3717|4035|4162|4249|4323|4638|4921|5054|5156|5159|5168|5295|5420|5724|6546|6591|6678|6774|6868|7010|7057|8754|8828|8829|9530|10000|10016|10519|10631|22954|25960|29126|54434|57381|57608|64750|147372|158747|196527|284119|441531	ADAM10|ARF6|CAV1|CRK|CSF1R|S1PR1|ETS1|F2R|FER|FGF1|FLT1|FN1|FPR2|HIF1A|HYAL1|ITGA4|ITGAV|ITGB3|JAK2|LRP1|MCAM|MGAT5|MMP14|MYLK|DDR2|SERPINE1|PDGFRA|PDGFRB|ENPP2|PIK3R1|PODXL|PTAFR|SLC8A1|SNAI2|SPARC|STAT3|ADAM17|TEK|THBS1|ADAM9|NRP2|NRP1|BAG4|AKT3|PDCD6|CIB1|POSTN|TRIM32|ADGRA2|CD274|SSH1|RHOJ|JCAD|SMURF2|CCBE1|MOSPD2|ANO6|CAVIN1|PGAM4	-3.36619	0	1	0	0	-8.54717	2.5568
1	-6.50392	GO:0040017	M1	1	0	GO Biological Processes	19	positive regulation of locomotion	-6.50392	1.97909	5.65173	24155	598	1245	61	4.8996	0.611768	102|382|857|1398|1436|1901|2113|2149|2241|2246|2321|2335|2358|3091|3373|3676|3685|3690|3717|4035|4162|4249|4323|4638|4921|5054|5156|5159|5168|5295|5420|5724|6546|6591|6678|6774|6868|7010|7057|8754|8828|8829|9353|9530|10000|10016|10519|10631|11149|22954|25960|29126|54434|57381|57608|64750|147372|158747|196527|284119|441531	ADAM10|ARF6|CAV1|CRK|CSF1R|S1PR1|ETS1|F2R|FER|FGF1|FLT1|FN1|FPR2|HIF1A|HYAL1|ITGA4|ITGAV|ITGB3|JAK2|LRP1|MCAM|MGAT5|MMP14|MYLK|DDR2|SERPINE1|PDGFRA|PDGFRB|ENPP2|PIK3R1|PODXL|PTAFR|SLC8A1|SNAI2|SPARC|STAT3|ADAM17|TEK|THBS1|ADAM9|NRP2|NRP1|SLIT2|BAG4|AKT3|PDCD6|CIB1|POSTN|BVES|TRIM32|ADGRA2|CD274|SSH1|RHOJ|JCAD|SMURF2|CCBE1|MOSPD2|ANO6|CAVIN1|PGAM4	-3.36619	0	1	0	0	-8.54717	2.5568
1	-6.49688	GO:0030335	M1	1	0	GO Biological Processes	19	positive regulation of cell migration	-6.49688	2.03289	5.68019	24155	544	1245	57	4.57831	0.592368	102|382|857|1398|1436|1901|2113|2149|2241|2246|2321|2335|2358|3091|3373|3676|3685|3690|3717|4035|4162|4249|4323|4638|4921|5054|5156|5159|5168|5295|5420|5724|6546|6591|6678|6774|6868|7010|7057|8754|8828|8829|9530|10000|10016|10519|10631|22954|25960|29126|54434|57381|57608|64750|147372|158747|196527	ADAM10|ARF6|CAV1|CRK|CSF1R|S1PR1|ETS1|F2R|FER|FGF1|FLT1|FN1|FPR2|HIF1A|HYAL1|ITGA4|ITGAV|ITGB3|JAK2|LRP1|MCAM|MGAT5|MMP14|MYLK|DDR2|SERPINE1|PDGFRA|PDGFRB|ENPP2|PIK3R1|PODXL|PTAFR|SLC8A1|SNAI2|SPARC|STAT3|ADAM17|TEK|THBS1|ADAM9|NRP2|NRP1|BAG4|AKT3|PDCD6|CIB1|POSTN|TRIM32|ADGRA2|CD274|SSH1|RHOJ|JCAD|SMURF2|CCBE1|MOSPD2|ANO6	-3.36619	0	1	0	0	-8.54717	2.5568
1	-6.48759	GO:0051272	M1	1	0	GO Biological Processes	19	positive regulation of cellular component movement	-6.48759	1.98991	5.65015	24155	585	1245	60	4.81928	0.606989	102|382|857|1398|1436|1901|2113|2149|2241|2246|2321|2335|2358|3091|3373|3676|3685|3690|3717|4035|4162|4249|4323|4638|4921|5054|5156|5159|5168|5295|5420|5724|6546|6591|6678|6774|6868|7010|7057|8754|8828|8829|9530|10000|10016|10519|10631|22954|25960|29126|54434|57381|57608|64750|147372|158747|196527|284119|388591|441531	ADAM10|ARF6|CAV1|CRK|CSF1R|S1PR1|ETS1|F2R|FER|FGF1|FLT1|FN1|FPR2|HIF1A|HYAL1|ITGA4|ITGAV|ITGB3|JAK2|LRP1|MCAM|MGAT5|MMP14|MYLK|DDR2|SERPINE1|PDGFRA|PDGFRB|ENPP2|PIK3R1|PODXL|PTAFR|SLC8A1|SNAI2|SPARC|STAT3|ADAM17|TEK|THBS1|ADAM9|NRP2|NRP1|BAG4|AKT3|PDCD6|CIB1|POSTN|TRIM32|ADGRA2|CD274|SSH1|RHOJ|JCAD|SMURF2|CCBE1|MOSPD2|ANO6|CAVIN1|RNF207|PGAM4	-3.36619	0	1	0	0	-8.54717	2.5568
1	-6.06723	GO:0034446	M1	1	0	GO Biological Processes	19	substrate adhesion-dependent cell spreading	-6.06723	3.64981	6.22082	24155	101	1245	19	1.5261	0.347431	1398|2241|2335|3676|3685|3690|4241|7010|8324|8516|8829|10519|10631|10979|11149|23603|55742|79778|84168	CRK|FER|FN1|ITGA4|ITGAV|ITGB3|MELTF|TEK|FZD7|ITGA8|NRP1|CIB1|POSTN|FERMT2|BVES|CORO1C|PARVA|MICALL2|ANTXR1	-2.98059	0	4	1	1	-6.06723	3.64981
1	-5.90668	GO:0010839	M1	1	0	GO Biological Processes	19	negative regulation of keratinocyte proliferation	-5.90668	10.447	7.9423	24155	13	1245	7	0.562249	0.211912	687|1948|5469|5796|6591|126695|135228	KLF9|EFNB2|MED1|PTPRK|SNAI2|KDF1|CD109	-2.85223	0	5	1	1	-5.90668	10.447
1	-5.85006	GO:0070848	M1	1	0	GO Biological Processes	19	response to growth factor	-5.85006	1.81152	5.22312	24155	739	1245	69	5.54217	0.648447	382|632|857|960|1281|1385|1398|2081|2200|2241|2246|2321|2530|2615|3091|3373|3690|3693|4015|4131|5028|5156|5159|5469|5494|5781|5796|6093|6498|6591|6660|6678|6868|6935|7057|7442|8516|8754|8822|8828|8829|9197|9353|9392|9530|10016|10519|10631|10979|11167|23064|23191|23527|23768|25960|26060|27122|28996|50855|51552|57045|57608|64750|79176|79812|81792|118813|135228|147372	ARF6|BGLAP|CAV1|CD44|COL3A1|CREB1|CRK|ERN1|FBN1|FER|FGF1|FLT1|FUT8|LRRC32|HIF1A|HYAL1|ITGB3|ITGB5|LOX|MAP1B|P2RY1|PDGFRA|PDGFRB|MED1|PPM1A|PTPN11|PTPRK|ROCK1|SKIL|SNAI2|SOX5|SPARC|ADAM17|ZEB1|THBS1|TRPV1|ITGA8|ADAM9|FGF17|NRP2|NRP1|SLC33A1|SLIT2|TGFBRAP1|BAG4|PDCD6|CIB1|POSTN|FERMT2|FSTL1|SETX|CYFIP1|ACAP2|FLRT2|ADGRA2|APPL1|DKK3|HIPK2|PARD6A|RAB14|TWSG1|JCAD|SMURF2|FBXL15|MMRN2|ADAMTS12|ZFYVE27|…	-2.82557	0	6	1	1	-5.85006	2.40119
1	-5.57744	GO:0071363	M1	1	0	GO Biological Processes	19	cellular response to growth factor stimulus	-5.57744	1.80607	5.07844	24155	709	1245	66	5.3012	0.635002	382|632|857|960|1281|1385|1398|2081|2200|2246|2321|2530|2615|3091|3373|3690|3693|4015|4131|5156|5159|5469|5494|5781|5796|6498|6591|6660|6678|6868|6935|7057|7442|8516|8754|8822|8828|8829|9197|9353|9392|9530|10016|10519|10631|10979|11167|23064|23191|23527|23768|25960|26060|27122|28996|50855|51552|57045|57608|64750|79176|79812|81792|118813|135228|147372	ARF6|BGLAP|CAV1|CD44|COL3A1|CREB1|CRK|ERN1|FBN1|FGF1|FLT1|FUT8|LRRC32|HIF1A|HYAL1|ITGB3|ITGB5|LOX|MAP1B|PDGFRA|PDGFRB|MED1|PPM1A|PTPN11|PTPRK|SKIL|SNAI2|SOX5|SPARC|ADAM17|ZEB1|THBS1|TRPV1|ITGA8|ADAM9|FGF17|NRP2|NRP1|SLC33A1|SLIT2|TGFBRAP1|BAG4|PDCD6|CIB1|POSTN|FERMT2|FSTL1|SETX|CYFIP1|ACAP2|FLRT2|ADGRA2|APPL1|DKK3|HIPK2|PARD6A|RAB14|TWSG1|JCAD|SMURF2|FBXL15|MMRN2|ADAMTS12|ZFYVE27|CD109|CCBE1	-2.58098	0	6	0	0	-5.85006	2.40119
1	-5.40262	GO:0071417	M1	1	0	GO Biological Processes	19	cellular response to organonitrogen compound	-5.40262	1.87757	5.0265	24155	589	1245	57	4.57831	0.592368	523|632|781|857|1281|1282|1385|1398|2101|2200|2230|2241|2358|2932|3676|3717|4035|4131|4644|4690|4976|5028|5156|5290|5294|5295|5621|5724|5781|6093|6546|6774|6818|6935|7099|7391|7442|9353|9400|10097|10312|11031|23191|26060|28956|54434|54464|55667|57085|57407|64121|65010|114548|114814|114882|245973|729438	ATP6V1A|BGLAP|CACNA2D1|CAV1|COL3A1|COL4A1|CREB1|CRK|ESRRA|FBN1|FDX1|FER|FPR2|GSK3B|ITGA4|JAK2|LRP1|MAP1B|MYO5A|NCK1|OPA1|P2RY1|PDGFRA|PIK3CA|PIK3CG|PIK3R1|PRNP|PTAFR|PTPN11|ROCK1|SLC8A1|STAT3|SULT1A3|ZEB1|TLR4|USF1|TRPV1|SLIT2|RECQL5|ACTR2|TCIRG1|RAB31|CYFIP1|APPL1|LAMTOR2|SSH1|XRN1|DENND4C|AGTRAP|NMRAL1|RRAGC|SLC26A6|NLRP3|GNRHR2|OSBPL8|ATP6V1C2|CASTOR2	-2.43249	0	7	1	1	-5.40262	1.87757
1	-5.26914	GO:1901699	M1	1	0	GO Biological Processes	19	cellular response to nitrogen compound	-5.26914	1.81518	4.91907	24155	652	1245	61	4.8996	0.611768	523|632|781|857|1281|1282|1385|1398|2101|2200|2230|2241|2358|2767|2932|3661|3676|3717|4035|4131|4644|4690|4976|5028|5156|5290|5294|5295|5621|5724|5781|5899|6093|6546|6774|6818|6935|7099|7391|7442|9131|9353|9400|10097|10312|11031|23191|26060|28956|54434|54464|55667|57085|57407|64121|65010|114548|114814|114882|245973|729438	ATP6V1A|BGLAP|CACNA2D1|CAV1|COL3A1|COL4A1|CREB1|CRK|ESRRA|FBN1|FDX1|FER|FPR2|GNA11|GSK3B|IRF3|ITGA4|JAK2|LRP1|MAP1B|MYO5A|NCK1|OPA1|P2RY1|PDGFRA|PIK3CA|PIK3CG|PIK3R1|PRNP|PTAFR|PTPN11|RALB|ROCK1|SLC8A1|STAT3|SULT1A3|ZEB1|TLR4|USF1|TRPV1|AIFM1|SLIT2|RECQL5|ACTR2|TCIRG1|RAB31|CYFIP1|APPL1|LAMTOR2|SSH1|XRN1|DENND4C|AGTRAP|NMRAL1|RRAGC|SLC26A6|NLRP3|GNRHR2|OSBPL8|ATP6V1C2|CASTOR2	-2.32384	0	7	0	0	-5.40262	1.87757
1	-5.12745	GO:0007005	M1	1	0	GO Biological Processes	19	mitochondrion organization	-5.12745	1.89997	4.88838	24155	531	1245	52	4.17671	0.56698	509|516|517|521|522|539|617|1386|1981|2101|2932|3091|4124|4695|4700|4716|4718|4725|4728|4729|4731|4976|5599|6774|7529|7755|8996|9530|9821|9997|10000|10476|10632|11315|23410|28958|29796|51287|54543|55572|56181|79778|83858|89941|90639|93974|96459|118424|139322|219293|285521|493753	ATP5F1C|ATP5MC1|ATP5MC2|ATP5ME|ATP5PF|ATP5PO|BCS1L|ATF2|EIF4G1|ESRRA|GSK3B|HIF1A|MAN2A1|NDUFA2|NDUFA6|NDUFB10|NDUFC2|NDUFS5|NDUFS8|NDUFV2|NDUFV3|OPA1|MAPK8|STAT3|YWHAB|ZNF205|NOL3|BAG4|RB1CC1|SCO2|AKT3|ATP5PD|ATP5MG|PARK7|SIRT3|COA3|UQCR10|COA4|TOMM7|FOXRED1|MTFR1L|MICALL2|ATAD3B|RHOT2|COX19|ATP5IF1|FNIP1|UBE2J2|APOOL|ATAD3C|COX18|COA5	-2.24817	0	8	1	1	-5.12745	6.74838
1	-5.12475	GO:0033108	M1	1	0	GO Biological Processes	19	mitochondrial respiratory chain complex assembly	-5.12475	3.4357	5.57426	24155	96	1245	17	1.36546	0.328904	617|4695|4700|4716|4718|4725|4728|4729|4731|9997|28958|29796|51287|55572|90639|285521|493753	BCS1L|NDUFA2|NDUFA6|NDUFB10|NDUFC2|NDUFS5|NDUFS8|NDUFV2|NDUFV3|SCO2|COA3|UQCR10|COA4|FOXRED1|COX19|COX18|COA5	-2.24817	0	9	1	1	-5.12475	3.52756
1	-5.12475	GO:0048010	M1	1	0	GO Biological Processes	19	vascular endothelial growth factor receptor signaling pathway	-5.12475	3.4357	5.57426	24155	96	1245	17	1.36546	0.328904	1398|2321|3091|3685|3690|4690|5062|5290|5291|5295|6093|8828|8829|10016|10787|23191|79812	CRK|FLT1|HIF1A|ITGAV|ITGB3|NCK1|PAK2|PIK3CA|PIK3CB|PIK3R1|ROCK1|NRP2|NRP1|PDCD6|NCKAP1|CYFIP1|MMRN2	-2.24817	0	10	1	1	-5.12475	3.4357
1	-5.10632	GO:0033627	M1	1	0	GO Biological Processes	19	cell adhesion mediated by integrin	-5.10632	3.99445	5.7643	24155	68	1245	14	1.1245	0.29884	1398|2200|3676|3685|3690|3693|5054|5294|5420|5781|6591|6868|8754|10519	CRK|FBN1|ITGA4|ITGAV|ITGB3|ITGB5|SERPINE1|PIK3CG|PODXL|PTPN11|SNAI2|ADAM17|ADAM9|CIB1	-2.24817	0	11	1	1	-5.10632	3.99445
1	-4.92386	GO:0042776	M1	1	0	GO Biological Processes	19	mitochondrial ATP synthesis coupled proton transport	-4.92386	6.74838	6.42954	24155	23	1245	8	0.64257	0.226452	509|516|517|521|522|539|10476|10632	ATP5F1C|ATP5MC1|ATP5MC2|ATP5ME|ATP5PF|ATP5PO|ATP5PD|ATP5MG	-2.10349	0	8	0	0	-5.12745	6.74838
1	-4.93161	GO:0061298	M1	1	0	GO Biological Processes	19	retina vasculature development in camera-type eye	-4.93161	7.9889	6.71969	24155	17	1245	7	0.562249	0.211912	1282|3091|5156|5159|8829|57381|91355	COL4A1|HIF1A|PDGFRA|PDGFRB|NRP1|RHOJ|LRP5L	-2.10349	0	12	1	1	-4.93161	7.9889
1	-4.84468	GO:0007264	M1	1	0	GO Biological Processes	19	small GTPase mediated signal transduction	-4.84468	1.83162	4.69235	24155	572	1245	54	4.33735	0.577296	19|382|394|1281|1398|2048|2149|3084|3717|5159|5878|5899|5912|5922|5924|6093|6242|6478|6655|7077|7204|7879|8829|9353|9754|10146|10256|10672|10787|11031|11315|23191|23362|25837|26037|27237|27352|51552|51715|51735|53916|53917|57139|57186|57381|57493|57584|64121|83892|89941|93663|139818|152273|253980	ABCA1|ARF6|ARHGAP5|COL3A1|CRK|EPHB2|F2R|NRG1|JAK2|PDGFRB|RAB5C|RALB|RAP2B|RASA2|RASGRF2|ROCK1|RTKN|SIAH2|SOS2|TIMP2|TRIO|RAB7A|NRP1|SLIT2|STARD8|G3BP1|CNKSR1|GNA13|NCKAP1|RAB31|PARK7|CYFIP1|PSD3|RAB26|SIPA1L1|ARHGEF16|SGSM3|RAB14|RAB23|RAPGEF6|RAB4B|RAB24|RGL3|RALGAPA2|RHOJ|HEG1|ARHGAP21|RRAGC|KCTD10|RHOT2|ARHGAP18|DOCK11|FGD5|KCTD13	-2.04204	0	13	1	1	-4.84468	1.90212
1	-4.79883	GO:0080135	M1	1	0	GO Biological Processes	19	regulation of cellular response to stress	-4.79883	1.70962	4.59907	24155	749	1245	66	5.3012	0.635002	545|842|857|960|1739|1981|2081|2140|2530|2932|3091|3312|4035|4690|4928|4976|5048|5074|5295|5660|5883|5933|6498|6591|6787|7099|7327|8086|8324|8792|8996|9258|9320|9400|9530|9618|9821|9839|10000|10097|10134|10746|10955|11183|11315|22954|23008|23201|28996|51035|51149|54780|55074|55183|55611|57551|80237|83719|83737|84309|84501|131870|151636|151987|158880|165918	ATR|CASP9|CAV1|CD44|DLG1|EIF4G1|ERN1|EYA3|FUT8|GSK3B|HIF1A|HSPA8|LRP1|NCK1|NUP98|OPA1|PAFAH1B1|PAWR|PIK3R1|PSAP|RAD9A|RBL1|SKIL|SNAI2|NEK4|TLR4|UBE2G2|AAAS|FZD7|TNFRSF11A|NOL3|MFHAS1|TRIP12|RECQL5|BAG4|TRAF4|RB1CC1|ZEB2|AKT3|ACTR2|BCAP31|MAP3K2|SERINC3|MAP4K5|PARK7|TRIM32|KLHDC10|FAM168A|HIPK2|UBXN1|MRNIP|NSMCE4A|OXR1|RIF1|OTUB1|TAOK1|ELL3|YPEL3|ITCH|NUDT16L1|SPIRE2|NUDT16|DTX3L|PPP4R2|USP51|RNF1…	-2.01323	0	14	1	1	-4.79883	1.70962
1	-4.74203	GO:0030155	M1	1	0	GO Biological Processes	19	regulation of cell adhesion	-4.74203	1.73579	4.58144	24155	693	1245	62	4.97992	0.616502	102|182|857|960|1398|1739|1842|1901|1948|2113|2335|2615|2932|3373|3559|3575|3676|3685|3717|3910|4035|4155|4241|4323|4659|4690|4811|4921|5054|5062|5074|5290|5291|5294|5295|5420|5621|5724|5781|6093|6591|7010|7045|7057|8324|8754|8829|9530|10019|10085|10154|10519|10631|23603|29126|30835|54542|57045|79812|91584|114548|151887	ADAM10|JAG1|CAV1|CD44|CRK|DLG1|ECM2|S1PR1|EFNB2|ETS1|FN1|LRRC32|GSK3B|HYAL1|IL2RA|IL7R|ITGA4|ITGAV|JAK2|LAMA4|LRP1|MBP|MELTF|MMP14|PPP1R12A|NCK1|NID1|DDR2|SERPINE1|PAK2|PAWR|PIK3CA|PIK3CB|PIK3CG|PIK3R1|PODXL|PRNP|PTAFR|PTPN11|ROCK1|SNAI2|TEK|TGFBI|THBS1|FZD7|ADAM9|NRP1|BAG4|SH2B3|EDIL3|PLXNC1|CIB1|POSTN|CORO1C|CD274|CD209|RC3H2|TWSG1|MMRN2|PLXNA4|NLRP3|CCDC80	-2.00385	0	3	0	0	-7.12019	2.74713
1	-4.75107	GO:0007006	M1	1	0	GO Biological Processes	19	mitochondrial membrane organization	-4.75107	2.89576	5.12988	24155	134	1245	20	1.60643	0.356311	509|516|517|521|522|539|1386|2932|4976|5599|6774|7529|7755|8996|10476|10632|89941|93974|139322|285521	ATP5F1C|ATP5MC1|ATP5MC2|ATP5ME|ATP5PF|ATP5PO|ATF2|GSK3B|OPA1|MAPK8|STAT3|YWHAB|ZNF205|NOL3|ATP5PD|ATP5MG|RHOT2|ATP5IF1|APOOL|COX18	-2.00385	0	8	0	0	-5.12745	6.74838
1	-4.75255	GO:0006119	M1	1	0	GO Biological Processes	19	oxidative phosphorylation	-4.75255	2.80989	5.09573	24155	145	1245	21	1.68675	0.364961	509|516|517|521|522|539|1350|4695|4700|4716|4718|4725|4728|4729|4731|10476|10632|11315|27089|29796|57017	ATP5F1C|ATP5MC1|ATP5MC2|ATP5ME|ATP5PF|ATP5PO|COX7C|NDUFA2|NDUFA6|NDUFB10|NDUFC2|NDUFS5|NDUFS8|NDUFV2|NDUFV3|ATP5PD|ATP5MG|PARK7|UQCRQ|UQCR10|COQ9	-2.00385	0	9	0	0	-5.12475	3.52756
1	-4.7054	GO:0030198	M1	1	0	GO Biological Processes	19	extracellular matrix organization	-4.7054	2.04503	4.72222	24155	370	1245	39	3.13253	0.493687	102|960|1281|1282|1293|1306|1842|2113|2200|2335|2683|3672|3676|3685|3690|3693|3910|4015|4035|4241|4323|4324|4791|4811|4921|5054|5156|6678|7045|7057|7077|7092|8434|8516|9509|10631|23768|84168|151887	ADAM10|CD44|COL3A1|COL4A1|COL6A3|COL15A1|ECM2|ETS1|FBN1|FN1|B4GALT1|ITGA1|ITGA4|ITGAV|ITGB3|ITGB5|LAMA4|LOX|LRP1|MELTF|MMP14|MMP15|NFKB2|NID1|DDR2|SERPINE1|PDGFRA|SPARC|TGFBI|THBS1|TIMP2|TLL1|RECK|ITGA8|ADAMTS2|POSTN|FLRT2|ANTXR1|CCDC80	-1.98274	0	15	1	1	-4.7054	2.04503
1	-4.68524	GO:0043062	M1	1	0	GO Biological Processes	19	extracellular structure organization	-4.68524	1.96299	4.66909	24155	425	1245	43	3.45382	0.517526	19|102|960|1281|1282|1293|1306|1842|2113|2200|2335|2683|3373|3672|3676|3685|3690|3693|3910|4015|4035|4241|4323|4324|4791|4811|4921|5054|5156|6678|7045|7057|7077|7092|8434|8516|8694|9509|10347|10631|23768|84168|151887	ABCA1|ADAM10|CD44|COL3A1|COL4A1|COL6A3|COL15A1|ECM2|ETS1|FBN1|FN1|B4GALT1|HYAL1|ITGA1|ITGA4|ITGAV|ITGB3|ITGB5|LAMA4|LOX|LRP1|MELTF|MMP14|MMP15|NFKB2|NID1|DDR2|SERPINE1|PDGFRA|SPARC|TGFBI|THBS1|TIMP2|TLL1|RECK|ITGA8|DGAT1|ADAMTS2|ABCA7|POSTN|FLRT2|ANTXR1|CCDC80	-1.98274	0	15	0	0	-4.7054	2.04503
1	-4.67817	GO:0030036	M1	1	0	GO Biological Processes	19	actin cytoskeleton organization	-4.67817	1.74527	4.5501	24155	667	1245	60	4.81928	0.606989	87|382|1266|1398|1436|1739|1901|2037|2241|2764|3693|3717|3993|4035|4627|4690|5048|5074|5156|5159|5295|5910|5987|6093|6242|6711|7010|7094|8558|8829|9113|9353|9530|10097|10787|22921|22954|23002|23022|23191|23603|26037|27032|30011|50944|54434|55742|57381|57551|79778|80206|84168|84501|93663|122786|152273|253980|283431|339451|374666	ACTN1|ARF6|CNN3|CRK|CSF1R|DLG1|S1PR1|EPB41L2|FER|GMFB|ITGB5|JAK2|LLGL2|LRP1|MYH9|NCK1|PAFAH1B1|PAWR|PDGFRA|PDGFRB|PIK3R1|RAP1GDS1|TRIM27|ROCK1|RTKN|SPTBN1|TEK|TLN1|CDK10|NRP1|LATS1|SLIT2|BAG4|ACTR2|NCKAP1|MSRB2|TRIM32|DAAM1|PALLD|CYFIP1|CORO1C|SIPA1L1|ATP2C1|SH3KBP1|SHANK1|SSH1|PARVA|RHOJ|TAOK1|MICALL2|FHOD3|ANTXR1|SPIRE2|ARHGAP18|FRMD6|FGD5|KCTD13|GAS2L3|KLHL17|WASH3P	-1.98274	0	16	1	1	-4.67817	3.2336
1	-4.60118	GO:0031334	M1	1	0	GO Biological Processes	19	positive regulation of protein complex assembly	-4.60118	2.23587	4.75165	24155	269	1245	31	2.48996	0.441607	19|382|545|1385|1739|1981|2241|2764|2932|2967|4131|4690|5987|7099|9530|10097|10146|10787|23064|23116|23191|50807|51199|56919|79969|84501|89795|96459|170506|374666|404672	ABCA1|ARF6|ATR|CREB1|DLG1|EIF4G1|FER|GMFB|GSK3B|GTF2H3|MAP1B|NCK1|TRIM27|TLR4|BAG4|ACTR2|G3BP1|NCKAP1|SETX|TOGARAM1|CYFIP1|ASAP1|NIN|DHX33|ATAT1|SPIRE2|NAV3|FNIP1|DHX36|WASH3P|GTF2H5	-1.94468	0	16	0	0	-4.67817	3.2336
1	-4.62037	GO:0021952	M1	1	0	GO Biological Processes	19	central nervous system projection neuron axonogenesis	-4.62037	6.20851	6.07396	24155	25	1245	8	0.64257	0.226452	1009|2048|5048|9353|9839|51199|91584|113246	CDH11|EPHB2|PAFAH1B1|SLIT2|ZEB2|NIN|PLXNA4|C12orf57	-1.94468	0	17	1	1	-4.62037	12.9344
1	-4.6043	GO:0010942	M1	1	0	GO Biological Processes	19	positive regulation of cell death	-4.6043	1.70096	4.48315	24155	730	1245	64	5.14056	0.625837	102|166|580|842|857|1385|1386|1948|1981|2149|2683|2932|3482|3624|3672|3676|3717|4035|4690|5062|5074|5159|5291|5599|5621|5883|5924|6135|6498|6655|6733|7057|7099|7204|7442|7529|7755|8406|8633|8797|9113|9131|9353|10016|10134|10672|10955|11315|25855|27237|29126|51447|51651|54434|55367|60485|64393|80759|93974|96459|114548|196527|400410|414899	ADAM10|TLE5|BARD1|CASP9|CAV1|CREB1|ATF2|EFNB2|EIF4G1|F2R|B4GALT1|GSK3B|IGF2R|INHBA|ITGA1|ITGA4|JAK2|LRP1|NCK1|PAK2|PAWR|PDGFRB|PIK3CB|MAPK8|PRNP|RAD9A|RASGRF2|RPL11|SKIL|SOS2|SRPK2|THBS1|TLR4|TRIO|TRPV1|YWHAB|ZNF205|SRPX|UNC5C|TNFRSF10A|LATS1|AIFM1|SLIT2|PDCD6|BCAP31|GNA13|SERINC3|PARK7|BRMS1|ARHGEF16|CD274|IP6K2|PTRH2|SSH1|PIDD1|SAV1|ZMAT3|KHDC1|ATP5IF1|FNIP1|NLRP3|ANO6|ST20|BLID	-1.94468	0	18	1	1	-4.6043	1.8048
1	-4.53811	GO:0006935	M1	1	0	GO Biological Processes	19	chemotaxis	-4.53811	1.74464	4.46855	24155	645	1245	58	4.65863	0.59729	102|1385|1398|1436|1652|1901|1944|1948|2048|2241|2246|2321|2357|2358|2359|3084|3672|3685|3690|4015|4035|4485|5054|5156|5159|5168|5290|5291|5294|5295|5724|5781|6259|6586|6711|6868|7057|7204|8609|8633|8792|8828|8829|9252|9353|10154|11313|23022|23191|23768|25960|27237|30011|55742|91584|91624|158747|196527	ADAM10|CREB1|CRK|CSF1R|DDT|S1PR1|EFNA3|EFNB2|EPHB2|FER|FGF1|FLT1|FPR1|FPR2|FPR3|NRG1|ITGA1|ITGAV|ITGB3|LOX|LRP1|MST1|SERPINE1|PDGFRA|PDGFRB|ENPP2|PIK3CA|PIK3CB|PIK3CG|PIK3R1|PTAFR|PTPN11|RYK|SLIT3|SPTBN1|ADAM17|THBS1|TRIO|KLF7|UNC5C|TNFRSF11A|NRP2|NRP1|RPS6KA5|SLIT2|PLXNC1|LYPLA2|PALLD|CYFIP1|FLRT2|ADGRA2|ARHGEF16|SH3KBP1|PARVA|PLXNA4|NEXN|MOSPD2|ANO6	-1.90337	0	2	0	0	-7.50906	1.96166
1	-4.49988	GO:0042330	M1	1	0	GO Biological Processes	19	taxis	-4.49988	1.73925	4.44325	24155	647	1245	58	4.65863	0.59729	102|1385|1398|1436|1652|1901|1944|1948|2048|2241|2246|2321|2357|2358|2359|3084|3672|3685|3690|4015|4035|4485|5054|5156|5159|5168|5290|5291|5294|5295|5724|5781|6259|6586|6711|6868|7057|7204|8609|8633|8792|8828|8829|9252|9353|10154|11313|23022|23191|23768|25960|27237|30011|55742|91584|91624|158747|196527	ADAM10|CREB1|CRK|CSF1R|DDT|S1PR1|EFNA3|EFNB2|EPHB2|FER|FGF1|FLT1|FPR1|FPR2|FPR3|NRG1|ITGA1|ITGAV|ITGB3|LOX|LRP1|MST1|SERPINE1|PDGFRA|PDGFRB|ENPP2|PIK3CA|PIK3CB|PIK3CG|PIK3R1|PTAFR|PTPN11|RYK|SLIT3|SPTBN1|ADAM17|THBS1|TRIO|KLF7|UNC5C|TNFRSF11A|NRP2|NRP1|RPS6KA5|SLIT2|PLXNC1|LYPLA2|PALLD|CYFIP1|FLRT2|ADGRA2|ARHGEF16|SH3KBP1|PARVA|PLXNA4|NEXN|MOSPD2|ANO6	-1.90337	0	2	0	0	-7.50906	1.96166
1	-4.5051	GO:0042407	M1	1	0	GO Biological Processes	19	cristae formation	-4.5051	5.29135	5.75057	24155	33	1245	9	0.722892	0.240091	509|516|517|521|522|539|10476|10632|139322	ATP5F1C|ATP5MC1|ATP5MC2|ATP5ME|ATP5PF|ATP5PO|ATP5PD|ATP5MG|APOOL	-1.90337	0	8	0	0	-5.12745	6.74838
1	-4.4807	GO:0015985	M1	1	0	GO Biological Processes	19	energy coupled proton transport, down electrochemical gradient	-4.4807	5.96973	5.91039	24155	26	1245	8	0.64257	0.226452	509|516|517|521|522|539|10476|10632	ATP5F1C|ATP5MC1|ATP5MC2|ATP5ME|ATP5PF|ATP5PO|ATP5PD|ATP5MG	-1.90337	0	8	0	0	-5.12745	6.74838
1	-4.4807	GO:0015986	M1	1	0	GO Biological Processes	19	ATP synthesis coupled proton transport	-4.4807	5.96973	5.91039	24155	26	1245	8	0.64257	0.226452	509|516|517|521|522|539|10476|10632	ATP5F1C|ATP5MC1|ATP5MC2|ATP5ME|ATP5PF|ATP5PO|ATP5PD|ATP5MG	-1.90337	0	8	0	0	-5.12745	6.74838
1	-4.50317	GO:0034976	M1	1	0	GO Biological Processes	19	response to endoplasmic reticulum stress	-4.50317	2.17843	4.66515	24155	285	1245	32	2.57028	0.448489	37|550|857|2081|2932|4690|4976|5295|5924|6400|6818|7057|7094|7327|8406|9131|10134|10955|11315|23753|30827|51035|51360|51506|51608|55139|80279|81542|84236|93611|118424|160418	ACADVL|AUP1|CAV1|ERN1|GSK3B|NCK1|OPA1|PIK3R1|RASGRF2|SEL1L|SULT1A3|THBS1|TLN1|UBE2G2|SRPX|AIFM1|BCAP31|SERINC3|PARK7|SDF2L1|CXXC1|UBXN1|MBTPS2|UFC1|GET4|ANKZF1|CDK5RAP3|TMX1|RHBDD1|FBXO44|UBE2J2|TMTC3	-1.90337	0	19	1	1	-4.50317	2.32819
1	-4.49707	GO:0045859	M1	1	0	GO Biological Processes	19	regulation of protein kinase activity	-4.49707	1.65742	4.39685	24155	796	1245	68	5.46185	0.644004	857|904|1398|1436|1464|1636|1739|2048|2081|2149|2246|2321|2357|2764|3084|3672|3690|3717|4485|4515|4690|4921|5062|5159|5290|5291|5294|5621|5781|5899|5912|5987|6176|6787|6868|7057|7099|8754|8792|8797|9113|9618|9839|10019|10519|10746|10899|10983|11183|11315|23118|23603|28956|29990|51149|51755|54923|57493|57551|79706|80279|80829|81669|83707|84619|114882|124790|129138	CAV1|CCNT1|CRK|CSF1R|CSPG4|ACE|DLG1|EPHB2|ERN1|F2R|FGF1|FLT1|FPR1|GMFB|NRG1|ITGA1|ITGB3|JAK2|MST1|MTCP1|NCK1|DDR2|PAK2|PDGFRB|PIK3CA|PIK3CB|PIK3CG|PRNP|PTPN11|RALB|RAP2B|TRIM27|RPLP1|NEK4|ADAM17|THBS1|TLR4|ADAM9|TNFRSF11A|TNFRSF10A|LATS1|TRAF4|ZEB2|SH2B3|CIB1|MAP3K2|JTB|CCNI|MAP4K5|PARK7|TAB2|CORO1C|LAMTOR2|PILRB|MRNIP|CDK12|LIME1|HEG1|TAOK1|PRKRIP1|CDK5RAP3|ZFP91|CCNL2|TRPT1|ZGPAT|OSBPL8|HEXIM2|…	-1.90337	0	20	1	1	-4.49707	1.86442
1	-4.44276	GO:0007265	M1	1	0	GO Biological Processes	19	Ras protein signal transduction	-4.44276	1.90127	4.49382	24155	449	1245	44	3.53414	0.523292	19|382|394|1281|1398|2048|2149|3084|3717|5159|5878|5899|5912|5922|5924|6093|6242|6655|7077|7204|7879|8829|10146|10256|10672|10787|11031|11315|23191|23362|25837|27237|27352|51552|51715|51735|53916|53917|57381|57493|83892|89941|152273|253980	ABCA1|ARF6|ARHGAP5|COL3A1|CRK|EPHB2|F2R|NRG1|JAK2|PDGFRB|RAB5C|RALB|RAP2B|RASA2|RASGRF2|ROCK1|RTKN|SOS2|TIMP2|TRIO|RAB7A|NRP1|G3BP1|CNKSR1|GNA13|NCKAP1|RAB31|PARK7|CYFIP1|PSD3|RAB26|ARHGEF16|SGSM3|RAB14|RAB23|RAPGEF6|RAB4B|RAB24|RHOJ|HEG1|KCTD10|RHOT2|FGD5|KCTD13	-1.88563	0	13	0	0	-4.84468	1.90212
1	-4.44668	GO:0043410	M1	1	0	GO Biological Processes	19	positive regulation of MAPK cascade	-4.44668	1.80562	4.44702	24155	548	1245	51	4.09639	0.561737	367|673|960|1398|1436|1464|1652|2081|2149|2246|2321|2357|2358|3084|3672|3717|4035|5028|5156|5159|5291|5294|5660|5781|6093|6259|7010|7057|7077|7099|8324|8558|8754|8792|8829|9258|9618|9821|9839|10347|10519|10746|11183|23008|23118|28956|28996|29937|56919|57551|57608	AR|BRAF|CD44|CRK|CSF1R|CSPG4|DDT|ERN1|F2R|FGF1|FLT1|FPR1|FPR2|NRG1|ITGA1|JAK2|LRP1|P2RY1|PDGFRA|PDGFRB|PIK3CB|PIK3CG|PSAP|PTPN11|ROCK1|RYK|TEK|THBS1|TIMP2|TLR4|FZD7|CDK10|ADAM9|TNFRSF11A|NRP1|MFHAS1|TRAF4|RB1CC1|ZEB2|ABCA7|CIB1|MAP3K2|MAP4K5|KLHDC10|TAB2|LAMTOR2|HIPK2|NENF|DHX33|TAOK1|JCAD	-1.88563	0	20	0	0	-4.49707	1.86442
1	-4.39037	GO:0033617	M1	1	0	GO Biological Processes	19	mitochondrial respiratory chain complex IV assembly	-4.39037	6.79056	6.03919	24155	20	1245	7	0.562249	0.211912	617|9997|28958|51287|90639|285521|493753	BCS1L|SCO2|COA3|COA4|COX19|COX18|COA5	-1.843	0	21	1	1	-4.39037	6.79056
1	-4.38029	GO:0009144	M1	1	0	GO Biological Processes	19	purine nucleoside triphosphate metabolic process	-4.38029	2.04227	4.52538	24155	342	1245	36	2.89157	0.474909	509|516|517|521|522|523|539|1350|3091|3098|3312|4695|4700|4716|4718|4725|4728|4729|4731|4832|4928|4976|6774|8086|10476|10632|11315|25939|26137|27089|29796|51715|57017|93974|131870|441531	ATP5F1C|ATP5MC1|ATP5MC2|ATP5ME|ATP5PF|ATP6V1A|ATP5PO|COX7C|HIF1A|HK1|HSPA8|NDUFA2|NDUFA6|NDUFB10|NDUFC2|NDUFS5|NDUFS8|NDUFV2|NDUFV3|NME3|NUP98|OPA1|STAT3|AAAS|ATP5PD|ATP5MG|PARK7|SAMHD1|ZBTB20|UQCRQ|UQCR10|RAB23|COQ9|ATP5IF1|NUDT16|PGAM4	-1.84247	0	9	0	0	-5.12475	3.52756
1	-4.33687	GO:0007179	M1	1	0	GO Biological Processes	19	transforming growth factor beta receptor signaling pathway	-4.33687	2.40119	4.66186	24155	202	1245	25	2.00803	0.397554	857|1281|1385|2200|2530|2615|3693|4015|5494|5796|6498|6868|6935|7057|8516|8754|9392|10979|26060|27122|28996|50855|57045|64750|135228	CAV1|COL3A1|CREB1|FBN1|FUT8|LRRC32|ITGB5|LOX|PPM1A|PTPRK|SKIL|ADAM17|ZEB1|THBS1|ITGA8|ADAM9|TGFBRAP1|FERMT2|APPL1|DKK3|HIPK2|PARD6A|TWSG1|SMURF2|CD109	-1.83526	0	6	0	0	-5.85006	2.40119
1	-4.33995	GO:0030029	M1	1	0	GO Biological Processes	19	actin filament-based process	-4.33995	1.65935	4.30553	24155	760	1245	65	5.22088	0.63044	87|382|781|857|1266|1398|1436|1739|1901|2037|2241|2764|3693|3717|3993|4035|4627|4644|4690|5048|5074|5156|5159|5295|5910|5987|6093|6242|6711|7010|7094|8558|8829|9113|9353|9530|10052|10097|10787|22921|22954|23002|23022|23191|23603|26037|27032|30011|50944|54434|55742|57381|57551|79778|80206|84168|84501|93663|122786|152273|253980|283431|339451|374666|388591	ACTN1|ARF6|CACNA2D1|CAV1|CNN3|CRK|CSF1R|DLG1|S1PR1|EPB41L2|FER|GMFB|ITGB5|JAK2|LLGL2|LRP1|MYH9|MYO5A|NCK1|PAFAH1B1|PAWR|PDGFRA|PDGFRB|PIK3R1|RAP1GDS1|TRIM27|ROCK1|RTKN|SPTBN1|TEK|TLN1|CDK10|NRP1|LATS1|SLIT2|BAG4|GJC1|ACTR2|NCKAP1|MSRB2|TRIM32|DAAM1|PALLD|CYFIP1|CORO1C|SIPA1L1|ATP2C1|SH3KBP1|SHANK1|SSH1|PARVA|RHOJ|TAOK1|MICALL2|FHOD3|ANTXR1|SPIRE2|ARHGAP18|FRMD6|FGD5|KCTD13|GAS2L3|KLHL17|WASH3P|RN…	-1.83526	0	16	0	0	-4.67817	3.2336
1	-4.35418	GO:0030168	M1	1	0	GO Biological Processes	19	platelet activation	-4.35418	2.64567	4.77591	24155	154	1245	21	1.68675	0.364961	87|1281|2149|2767|3690|4627|5028|5156|5290|5291|5294|5295|5781|5912|7056|7094|7099|10019|10672|55330|160851	ACTN1|COL3A1|F2R|GNA11|ITGB3|MYH9|P2RY1|PDGFRA|PIK3CA|PIK3CB|PIK3CG|PIK3R1|PTPN11|RAP2B|THBD|TLN1|TLR4|SH2B3|GNA13|BLOC1S4|DGKH	-1.83526	0	22	1	1	-4.35418	3.2336
1	-4.3535	GO:0042060	M1	1	0	GO Biological Processes	19	wound healing	-4.3535	1.77934	4.37761	24155	567	1245	52	4.17671	0.56698	87|857|960|1281|1398|2113|2149|2162|2335|2683|2767|3084|3091|3690|3717|4015|4162|4627|4638|5028|5054|5156|5159|5290|5291|5294|5295|5781|5912|6678|6868|7056|7057|7094|7099|7391|7975|8324|10019|10413|10631|10672|23414|25970|30845|55330|80856|131566|135228|139818|160851|196527	ACTN1|CAV1|CD44|COL3A1|CRK|ETS1|F2R|F13A1|FN1|B4GALT1|GNA11|NRG1|HIF1A|ITGB3|JAK2|LOX|MCAM|MYH9|MYLK|P2RY1|SERPINE1|PDGFRA|PDGFRB|PIK3CA|PIK3CB|PIK3CG|PIK3R1|PTPN11|RAP2B|SPARC|ADAM17|THBD|THBS1|TLN1|TLR4|USF1|MAFK|FZD7|SH2B3|YAP1|POSTN|GNA13|ZFPM2|SH2B1|EHD3|BLOC1S4|LNPK|DCBLD2|CD109|DOCK11|DGKH|ANO6	-1.83526	0	22	0	0	-4.35418	3.2336
1	-4.30803	GO:0043254	M1	1	0	GO Biological Processes	19	regulation of protein complex assembly	-4.30803	1.86156	4.39231	24155	469	1245	45	3.61446	0.528984	19|382|545|1385|1739|1981|2241|2764|2932|2967|3312|4131|4690|5195|5494|5781|5899|5987|6711|7099|9113|9353|9530|10097|10146|10787|11315|23064|23116|23191|50807|51112|51199|55729|56919|79969|80206|84501|89795|93663|96459|157922|170506|374666|404672	ABCA1|ARF6|ATR|CREB1|DLG1|EIF4G1|FER|GMFB|GSK3B|GTF2H3|HSPA8|MAP1B|NCK1|PEX14|PPM1A|PTPN11|RALB|TRIM27|SPTBN1|TLR4|LATS1|SLIT2|BAG4|ACTR2|G3BP1|NCKAP1|PARK7|SETX|TOGARAM1|CYFIP1|ASAP1|TRAPPC12|NIN|ATF7IP|DHX33|ATAT1|FHOD3|SPIRE2|NAV3|ARHGAP18|FNIP1|CAMSAP1|DHX36|WASH3P|GTF2H5	-1.82345	0	16	0	0	-4.67817	3.2336
1	-4.30937	GO:0043065	M1	1	0	GO Biological Processes	19	positive regulation of apoptotic process	-4.30937	1.70341	4.31108	24155	672	1245	59	4.73896	0.602163	102|166|580|842|857|1385|1386|2149|2683|2932|3482|3624|3672|3676|3717|4690|5062|5074|5159|5291|5599|5621|5883|5924|6135|6498|6655|6733|7057|7204|7442|7529|7755|8406|8633|8797|9113|9131|9353|10016|10134|10672|10955|11315|25855|27237|29126|51447|51651|55367|60485|64393|80759|93974|96459|114548|196527|400410|414899	ADAM10|TLE5|BARD1|CASP9|CAV1|CREB1|ATF2|F2R|B4GALT1|GSK3B|IGF2R|INHBA|ITGA1|ITGA4|JAK2|NCK1|PAK2|PAWR|PDGFRB|PIK3CB|MAPK8|PRNP|RAD9A|RASGRF2|RPL11|SKIL|SOS2|SRPK2|THBS1|TRIO|TRPV1|YWHAB|ZNF205|SRPX|UNC5C|TNFRSF10A|LATS1|AIFM1|SLIT2|PDCD6|BCAP31|GNA13|SERINC3|PARK7|BRMS1|ARHGEF16|CD274|IP6K2|PTRH2|PIDD1|SAV1|ZMAT3|KHDC1|ATP5IF1|FNIP1|NLRP3|ANO6|ST20|BLID	-1.82345	0	18	0	0	-4.6043	1.8048
1	-4.28292	GO:0021955	M1	1	0	GO Biological Processes	19	central nervous system neuron axonogenesis	-4.28292	4.98898	5.50522	24155	35	1245	9	0.722892	0.240091	1009|2048|5048|9334|9353|9839|51199|91584|113246	CDH11|EPHB2|PAFAH1B1|B4GALT5|SLIT2|ZEB2|NIN|PLXNA4|C12orf57	-1.80662	0	17	0	0	-4.62037	12.9344
1	-4.26922	GO:0021954	M1	1	0	GO Biological Processes	19	central nervous system neuron development	-4.26922	3.39528	5.00248	24155	80	1245	14	1.1245	0.29884	1009|1398|2048|5048|6586|8828|8829|9334|9353|9839|27089|51199|91584|113246	CDH11|CRK|EPHB2|PAFAH1B1|SLIT3|NRP2|NRP1|B4GALT5|SLIT2|ZEB2|UQCRQ|NIN|PLXNA4|C12orf57	-1.80103	0	17	0	0	-4.62037	12.9344
1	-4.20995	GO:0043393	M1	1	0	GO Biological Processes	19	regulation of protein binding	-4.20995	2.31395	4.54297	24155	218	1245	26	2.08835	0.405261	166|382|857|1398|1636|2932|3084|3676|4015|4035|5195|5599|5899|6093|6135|8829|9618|11315|23228|28996|51068|54496|59343|80011|129531|151636	TLE5|ARF6|CAV1|CRK|ACE|GSK3B|NRG1|ITGA4|LOX|LRP1|PEX14|MAPK8|RALB|ROCK1|RPL11|NRP1|TRAF4|PARK7|PLCL2|HIPK2|NMD3|PRMT7|SENP2|FAM192A|MITD1|DTX3L	-1.74974	0	23	1	1	-4.20995	2.92067
1	-4.19696	GO:0007007	M1	1	0	GO Biological Processes	19	inner mitochondrial membrane organization	-4.19696	4.40946	5.2768	24155	44	1245	10	0.803213	0.252976	509|516|517|521|522|539|4976|10476|10632|139322	ATP5F1C|ATP5MC1|ATP5MC2|ATP5ME|ATP5PF|ATP5PO|OPA1|ATP5PD|ATP5MG|APOOL	-1.74457	0	8	0	0	-5.12745	6.74838
1	-4.16598	GO:0043068	M1	1	0	GO Biological Processes	19	positive regulation of programmed cell death	-4.16598	1.68337	4.21383	24155	680	1245	59	4.73896	0.602163	102|166|580|842|857|1385|1386|2149|2683|2932|3482|3624|3672|3676|3717|4690|5062|5074|5159|5291|5599|5621|5883|5924|6135|6498|6655|6733|7057|7204|7442|7529|7755|8406|8633|8797|9113|9131|9353|10016|10134|10672|10955|11315|25855|27237|29126|51447|51651|55367|60485|64393|80759|93974|96459|114548|196527|400410|414899	ADAM10|TLE5|BARD1|CASP9|CAV1|CREB1|ATF2|F2R|B4GALT1|GSK3B|IGF2R|INHBA|ITGA1|ITGA4|JAK2|NCK1|PAK2|PAWR|PDGFRB|PIK3CB|MAPK8|PRNP|RAD9A|RASGRF2|RPL11|SKIL|SOS2|SRPK2|THBS1|TRIO|TRPV1|YWHAB|ZNF205|SRPX|UNC5C|TNFRSF10A|LATS1|AIFM1|SLIT2|PDCD6|BCAP31|GNA13|SERINC3|PARK7|BRMS1|ARHGEF16|CD274|IP6K2|PTRH2|PIDD1|SAV1|ZMAT3|KHDC1|ATP5IF1|FNIP1|NLRP3|ANO6|ST20|BLID	-1.72127	0	18	0	0	-4.6043	1.8048
1	-4.14918	GO:0071559	M1	1	0	GO Biological Processes	19	response to transforming growth factor beta	-4.14918	2.1808	4.4451	24155	258	1245	29	2.32932	0.427476	857|1281|1385|1398|2200|2530|2615|3693|4015|5494|5796|6093|6498|6660|6868|6935|7057|8516|8754|9392|10631|10979|26060|27122|28996|50855|57045|64750|135228	CAV1|COL3A1|CREB1|CRK|FBN1|FUT8|LRRC32|ITGB5|LOX|PPM1A|PTPRK|ROCK1|SKIL|SOX5|ADAM17|ZEB1|THBS1|ITGA8|ADAM9|TGFBRAP1|POSTN|FERMT2|APPL1|DKK3|HIPK2|PARD6A|TWSG1|SMURF2|CD109	-1.71203	0	6	0	0	-5.85006	2.40119
1	-4.10598	GO:0043408	M1	1	0	GO Biological Processes	19	regulation of MAPK cascade	-4.10598	1.62933	4.14846	24155	774	1245	65	5.22088	0.63044	367|673|857|960|1398|1436|1464|1652|1739|2048|2081|2149|2246|2321|2335|2357|2358|3084|3624|3672|3717|4035|5028|5048|5062|5156|5159|5291|5294|5660|5781|6093|6259|7010|7057|7077|7099|8324|8558|8754|8792|8829|9258|9618|9821|9839|10019|10347|10519|10746|11183|23008|23118|23410|28956|28996|29937|51755|54923|56919|57053|57551|57608|80279|83737	AR|BRAF|CAV1|CD44|CRK|CSF1R|CSPG4|DDT|DLG1|EPHB2|ERN1|F2R|FGF1|FLT1|FN1|FPR1|FPR2|NRG1|INHBA|ITGA1|JAK2|LRP1|P2RY1|PAFAH1B1|PAK2|PDGFRA|PDGFRB|PIK3CB|PIK3CG|PSAP|PTPN11|ROCK1|RYK|TEK|THBS1|TIMP2|TLR4|FZD7|CDK10|ADAM9|TNFRSF11A|NRP1|MFHAS1|TRAF4|RB1CC1|ZEB2|SH2B3|ABCA7|CIB1|MAP3K2|MAP4K5|KLHDC10|TAB2|SIRT3|LAMTOR2|HIPK2|NENF|CDK12|LIME1|DHX33|CHRNA10|TAOK1|JCAD|CDK5RAP3|ITCH	-1.67625	0	20	0	0	-4.49707	1.86442
1	-4.09469	GO:0022411	M1	1	0	GO Biological Processes	19	cellular component disassembly	-4.09469	1.76058	4.21013	24155	551	1245	50	4.01606	0.556436	102|857|960|1677|2113|2932|3091|3312|3796|3836|4035|4131|4241|4323|4324|4921|5048|5195|6150|6591|6711|7077|7092|9131|9711|9821|10519|11315|23064|26276|51069|51368|54543|54998|55052|57551|64951|64960|64976|64983|65993|80279|84305|89795|93974|118487|128308|157922|219402|400410	ADAM10|CAV1|CD44|DFFB|ETS1|GSK3B|HIF1A|HSPA8|KIF2A|KPNA1|LRP1|MAP1B|MELTF|MMP14|MMP15|DDR2|PAFAH1B1|PEX14|MRPL23|SNAI2|SPTBN1|TIMP2|TLL1|AIFM1|RUBCN|RB1CC1|CIB1|PARK7|SETX|VPS33B|MRPL2|TEX264|TOMM7|AURKAIP1|MRPL20|TAOK1|MRPS24|MRPS15|MRPL40|MRPL32|MRPS34|CDK5RAP3|PYM1|NAV3|ATP5IF1|CHCHD1|MRPL55|CAMSAP1|MTIF3|ST20	-1.6733	0	24	1	1	-4.09469	2.61595
1	-4.08238	GO:0042176	M1	1	0	GO Biological Processes	19	regulation of protein catabolic process	-4.08238	1.93507	4.28866	24155	381	1245	38	3.05221	0.487519	580|857|2932|3084|3949|4035|4194|5708|6093|6135|6625|7077|7327|7879|8754|9113|9827|10134|11315|22954|25807|25837|25976|26088|27352|28996|29934|51035|51160|54467|57589|64750|79016|80011|80279|83737|93974|160418	BARD1|CAV1|GSK3B|NRG1|LDLR|LRP1|MDM4|PSMD2|ROCK1|RPL11|SNRNP70|TIMP2|UBE2G2|RAB7A|ADAM9|LATS1|RGP1|BCAP31|PARK7|TRIM32|RHBDD3|RAB26|TIPARP|GGA1|SGSM3|HIPK2|SNX12|UBXN1|VPS28|ANKIB1|RIC1|SMURF2|DDA1|FAM192A|CDK5RAP3|ITCH|ATP5IF1|TMTC3	-1.6733	0	25	1	1	-4.08238	1.93507
1	-4.08148	GO:1990778	M1	1	0	GO Biological Processes	19	protein localization to cell periphery	-4.08148	2.04554	4.34017	24155	313	1245	33	2.6506	0.455255	102|367|382|857|1739|2037|2048|4035|4323|4644|5028|5295|5621|6093|6242|6711|9530|10082|10098|10484|10519|10640|11031|11079|25837|26060|26088|27237|30845|51735|55667|118813|200894	ADAM10|AR|ARF6|CAV1|DLG1|EPB41L2|EPHB2|LRP1|MMP14|MYO5A|P2RY1|PIK3R1|PRNP|ROCK1|RTKN|SPTBN1|BAG4|GPC6|TSPAN5|SEC23A|CIB1|EXOC5|RAB31|RER1|RAB26|APPL1|GGA1|ARHGEF16|EHD3|RAPGEF6|DENND4C|ZFYVE27|ARL13B	-1.6733	0	26	1	1	-4.08148	3.46457
1	-4.02294	GO:0022038	M1	1	0	GO Biological Processes	19	corpus callosum development	-4.02294	7.2756	5.85359	24155	16	1245	6	0.481928	0.196272	2048|5048|6259|9839|51199|113246	EPHB2|PAFAH1B1|RYK|ZEB2|NIN|C12orf57	-1.62771	0	17	0	0	-4.62037	12.9344
1	-4.02211	GO:0050919	M1	1	0	GO Biological Processes	19	negative chemotaxis	-4.02211	4.21774	5.09222	24155	46	1245	10	0.803213	0.252976	3084|3685|3690|6259|6586|8633|8828|9353|23768|91584	NRG1|ITGAV|ITGB3|RYK|SLIT3|UNC5C|NRP2|SLIT2|FLRT2|PLXNA4	-1.62771	0	27	1	1	-4.02211	9.7008
1	-4.01367	GO:0021540	M1	1	0	GO Biological Processes	19	corpus callosum morphogenesis	-4.01367	12.9344	6.81543	24155	6	1245	4	0.321285	0.160384	5048|9839|51199|113246	PAFAH1B1|ZEB2|NIN|C12orf57	-1.62601	0	17	0	0	-4.62037	12.9344
1	-3.98701	GO:0022604	M1	1	0	GO Biological Processes	19	regulation of cell morphogenesis	-3.98701	1.80387	4.16453	24155	484	1245	45	3.61446	0.528984	102|755|960|1398|1436|1739|2048|2335|2932|4035|4131|4241|4627|4976|5028|5048|5168|6259|6498|6678|8829|9353|9839|10097|10154|10519|10631|10672|10979|11149|23191|23603|26037|30011|51199|55742|57381|91584|93663|118813|128486|152273|157922|170506|445815	ADAM10|CFAP410|CD44|CRK|CSF1R|DLG1|EPHB2|FN1|GSK3B|LRP1|MAP1B|MELTF|MYH9|OPA1|P2RY1|PAFAH1B1|ENPP2|RYK|SKIL|SPARC|NRP1|SLIT2|ZEB2|ACTR2|PLXNC1|CIB1|POSTN|GNA13|FERMT2|BVES|CYFIP1|CORO1C|SIPA1L1|SH3KBP1|NIN|PARVA|RHOJ|PLXNA4|ARHGAP18|ZFYVE27|FITM2|FGD5|CAMSAP1|DHX36|PALM2AKAP2	-1.60598	0	28	1	1	-3.98701	2.45754
1	-3.94885	GO:0007507	M1	1	0	GO Biological Processes	19	heart development	-3.94885	1.71579	4.09626	24155	588	1245	52	4.17671	0.56698	182|1281|1385|1386|1901|1909|1948|2200|2767|3084|3091|4015|4194|4729|5125|5156|5159|5469|5781|6093|6443|6546|6586|6591|6678|7010|7528|8324|8828|8829|9095|9353|9821|10052|10203|10413|11149|23118|23414|23768|51668|55742|55897|57493|59343|60485|80114|80206|170506|200894|205428|388591	JAG1|COL3A1|CREB1|ATF2|S1PR1|EDNRA|EFNB2|FBN1|GNA11|NRG1|HIF1A|LOX|MDM4|NDUFV2|PCSK5|PDGFRA|PDGFRB|MED1|PTPN11|ROCK1|SGCB|SLC8A1|SLIT3|SNAI2|SPARC|TEK|YY1|FZD7|NRP2|NRP1|TBX19|SLIT2|RB1CC1|GJC1|CALCRL|YAP1|BVES|TAB2|ZFPM2|FLRT2|HSPB11|PARVA|MESP1|HEG1|SENP2|SAV1|BICC1|FHOD3|DHX36|ARL13B|DIPK2A|RNF207	-1.57434	0	29	1	1	-3.94885	2.1056
1	-3.94113	GO:0071560	M1	1	0	GO Biological Processes	19	cellular response to transforming growth factor beta stimulus	-3.94113	2.15573	4.29931	24155	252	1245	28	2.249	0.420214	857|1281|1385|1398|2200|2530|2615|3693|4015|5494|5796|6498|6660|6868|6935|7057|8516|8754|9392|10631|10979|26060|27122|28996|50855|57045|64750|135228	CAV1|COL3A1|CREB1|CRK|FBN1|FUT8|LRRC32|ITGB5|LOX|PPM1A|PTPRK|SKIL|SOX5|ADAM17|ZEB1|THBS1|ITGA8|ADAM9|TGFBRAP1|POSTN|FERMT2|APPL1|DKK3|HIPK2|PARD6A|TWSG1|SMURF2|CD109	-1.57306	0	6	0	0	-5.85006	2.40119
1	-3.92727	GO:2001020	M1	1	0	GO Biological Processes	19	regulation of response to DNA damage stimulus	-3.92727	2.26654	4.33833	24155	214	1245	25	2.00803	0.397554	545|842|960|2140|5883|6498|6591|6787|9320|9400|10097|22954|23201|51149|54780|55183|55611|80237|84309|84501|131870|151636|151987|158880|165918	ATR|CASP9|CD44|EYA3|RAD9A|SKIL|SNAI2|NEK4|TRIP12|RECQL5|ACTR2|TRIM32|FAM168A|MRNIP|NSMCE4A|RIF1|OTUB1|ELL3|NUDT16L1|SPIRE2|NUDT16|DTX3L|PPP4R2|USP51|RNF168	-1.56554	0	30	1	1	-3.92727	4.8504
1	-3.91612	GO:0033674	M1	1	0	GO Biological Processes	19	positive regulation of kinase activity	-3.91612	1.72084	4.07818	24155	575	1245	51	4.09639	0.561737	904|1398|1436|1464|1636|1739|2081|2149|2246|2321|2357|2358|3084|3672|3690|3717|4515|4921|5062|5156|5159|5290|5291|5294|5621|5781|5899|6176|6787|6868|7010|7057|7099|8754|8792|8797|9618|9839|10519|10746|10899|11183|11315|23118|28956|29990|30849|51149|57551|80829|114882	CCNT1|CRK|CSF1R|CSPG4|ACE|DLG1|ERN1|F2R|FGF1|FLT1|FPR1|FPR2|NRG1|ITGA1|ITGB3|JAK2|MTCP1|DDR2|PAK2|PDGFRA|PDGFRB|PIK3CA|PIK3CB|PIK3CG|PRNP|PTPN11|RALB|RPLP1|NEK4|ADAM17|TEK|THBS1|TLR4|ADAM9|TNFRSF11A|TNFRSF10A|TRAF4|ZEB2|CIB1|MAP3K2|JTB|MAP4K5|PARK7|TAB2|LAMTOR2|PILRB|PIK3R4|MRNIP|TAOK1|ZFP91|OSBPL8	-1.56064	0	20	0	0	-4.49707	1.86442
1	-3.90834	GO:0051345	M1	1	0	GO Biological Processes	19	positive regulation of hydrolase activity	-3.90834	1.61051	4.01631	24155	771	1245	64	5.14056	0.625837	141|394|842|857|1398|1901|1909|1944|2149|2321|2335|2932|3672|3717|3993|4155|4659|5156|5159|5599|5660|5724|5910|5922|6774|8797|8829|9131|9462|9754|9827|10016|10134|10484|10641|10672|11080|23158|23527|23603|26037|26097|27237|27352|50807|51735|55367|57139|57186|57584|57589|80759|84168|93663|114548|119016|130872|134957|139818|163486|400410|414059|414189|414899	ADPRH|ARHGAP5|CASP9|CAV1|CRK|S1PR1|EDNRA|EFNA3|F2R|FLT1|FN1|GSK3B|ITGA1|JAK2|LLGL2|MBP|PPP1R12A|PDGFRA|PDGFRB|MAPK8|PSAP|PTAFR|RAP1GDS1|RASA2|STAT3|TNFRSF10A|NRP1|AIFM1|RASAL2|STARD8|RGP1|PDCD6|BCAP31|SEC23A|NPRL2|GNA13|DNAJB4|TBC1D9|ACAP2|CORO1C|SIPA1L1|CHTOP|ARHGEF16|SGSM3|ASAP1|RAPGEF6|PIDD1|RGL3|RALGAPA2|ARHGAP21|RIC1|KHDC1|ANTXR1|ARHGAP18|NLRP3|AGAP4|AHSA2P|STXBP5|DOCK11|DENND1B|ST20|TBC1D3B…	-1.55902	0	31	1	1	-3.90834	1.66068
1	-3.89492	GO:0010810	M1	1	0	GO Biological Processes	19	regulation of cell-substrate adhesion	-3.89492	2.256	4.31235	24155	215	1245	25	2.00803	0.397554	182|1398|1842|2335|2932|3717|4035|4241|4323|4811|4921|5054|5291|5295|6093|7010|7057|8324|8829|10085|10519|10631|23603|79812|151887	JAG1|CRK|ECM2|FN1|GSK3B|JAK2|LRP1|MELTF|MMP14|NID1|DDR2|SERPINE1|PIK3CB|PIK3R1|ROCK1|TEK|THBS1|FZD7|NRP1|EDIL3|CIB1|POSTN|CORO1C|MMRN2|CCDC80	-1.55167	0	3	0	0	-7.12019	2.74713
1	-3.87535	GO:0009141	M1	1	0	GO Biological Processes	19	nucleoside triphosphate metabolic process	-3.87535	1.92944	4.15354	24155	362	1245	36	2.89157	0.474909	509|516|517|521|522|523|539|1350|3091|3098|3312|4695|4700|4716|4718|4725|4728|4729|4731|4832|4928|4976|6774|8086|10476|10632|11315|25939|26137|27089|29796|51715|57017|93974|131870|441531	ATP5F1C|ATP5MC1|ATP5MC2|ATP5ME|ATP5PF|ATP6V1A|ATP5PO|COX7C|HIF1A|HK1|HSPA8|NDUFA2|NDUFA6|NDUFB10|NDUFC2|NDUFS5|NDUFS8|NDUFV2|NDUFV3|NME3|NUP98|OPA1|STAT3|AAAS|ATP5PD|ATP5MG|PARK7|SAMHD1|ZBTB20|UQCRQ|UQCR10|RAB23|COQ9|ATP5IF1|NUDT16|PGAM4	-1.54306	0	9	0	0	-5.12475	3.52756
1	-3.86282	GO:0009205	M1	1	0	GO Biological Processes	19	purine ribonucleoside triphosphate metabolic process	-3.86282	1.96912	4.16385	24155	335	1245	34	2.73092	0.46191	509|516|517|521|522|523|539|1350|3091|3098|3312|4695|4700|4716|4718|4725|4728|4729|4731|4832|4928|4976|6774|8086|10476|10632|11315|26137|27089|29796|51715|57017|93974|441531	ATP5F1C|ATP5MC1|ATP5MC2|ATP5ME|ATP5PF|ATP6V1A|ATP5PO|COX7C|HIF1A|HK1|HSPA8|NDUFA2|NDUFA6|NDUFB10|NDUFC2|NDUFS5|NDUFS8|NDUFV2|NDUFV3|NME3|NUP98|OPA1|STAT3|AAAS|ATP5PD|ATP5MG|PARK7|ZBTB20|UQCRQ|UQCR10|RAB23|COQ9|ATP5IF1|PGAM4	-1.54306	0	9	0	0	-5.12475	3.52756
1	-3.87194	GO:0009611	M1	1	0	GO Biological Processes	19	response to wounding	-3.87194	1.64999	4.01404	24155	682	1245	58	4.65863	0.59729	87|857|960|1281|1398|2113|2149|2162|2335|2683|2767|3084|3091|3624|3690|3717|4015|4035|4131|4162|4627|4638|5028|5054|5156|5159|5290|5291|5294|5295|5781|5912|6678|6868|7056|7057|7094|7099|7391|7975|8324|8829|8996|10019|10413|10631|10672|10894|23414|25970|30845|55330|80856|131566|135228|139818|160851|196527	ACTN1|CAV1|CD44|COL3A1|CRK|ETS1|F2R|F13A1|FN1|B4GALT1|GNA11|NRG1|HIF1A|INHBA|ITGB3|JAK2|LOX|LRP1|MAP1B|MCAM|MYH9|MYLK|P2RY1|SERPINE1|PDGFRA|PDGFRB|PIK3CA|PIK3CB|PIK3CG|PIK3R1|PTPN11|RAP2B|SPARC|ADAM17|THBD|THBS1|TLN1|TLR4|USF1|MAFK|FZD7|NRP1|NOL3|SH2B3|YAP1|POSTN|GNA13|LYVE1|ZFPM2|SH2B1|EHD3|BLOC1S4|LNPK|DCBLD2|CD109|DOCK11|DGKH|ANO6	-1.54306	0	22	0	0	-4.35418	3.2336
1	-3.86451	GO:0051088	M1	1	0	GO Biological Processes	19	PMA-inducible membrane protein ectodomain proteolysis	-3.86451	19.4016	7.4303	24155	3	1245	3	0.240964	0.138953	102|6868|8754	ADAM10|ADAM17|ADAM9	-1.54306	0	32	1	1	-3.86451	19.4016
1	-3.81942	GO:0008535	M1	1	0	GO Biological Processes	19	respiratory chain complex IV assembly	-3.81942	5.6588	5.32303	24155	24	1245	7	0.562249	0.211912	617|9997|28958|51287|90639|285521|493753	BCS1L|SCO2|COA3|COA4|COX19|COX18|COA5	-1.50533	0	21	0	0	-4.39037	6.79056
1	-3.81332	GO:0007596	M1	1	0	GO Biological Processes	19	blood coagulation	-3.81332	1.95743	4.12607	24155	337	1245	34	2.73092	0.46191	87|857|1281|2149|2162|2767|3690|3717|4627|5028|5054|5156|5290|5291|5294|5295|5781|5912|7056|7057|7094|7099|7391|7975|10019|10672|23414|25970|30845|55330|80856|139818|160851|196527	ACTN1|CAV1|COL3A1|F2R|F13A1|GNA11|ITGB3|JAK2|MYH9|P2RY1|SERPINE1|PDGFRA|PIK3CA|PIK3CB|PIK3CG|PIK3R1|PTPN11|RAP2B|THBD|THBS1|TLN1|TLR4|USF1|MAFK|SH2B3|GNA13|ZFPM2|SH2B1|EHD3|BLOC1S4|LNPK|DOCK11|DGKH|ANO6	-1.50484	0	22	0	0	-4.35418	3.2336
1	-3.78704	GO:0009100	M1	1	0	GO Biological Processes	19	glycoprotein metabolic process	-3.78704	1.83901	4.05337	24155	422	1245	40	3.21285	0.499769	746|1464|2132|2530|2683|3091|3340|3373|4121|4124|4249|5074|6400|6480|7327|8818|9334|9469|9953|10347|11315|22856|23753|29940|51363|54344|55454|64772|79158|79690|81792|84002|84197|93611|117248|160418|170384|200185|256435|727936	TMEM258|CSPG4|EXT2|FUT8|B4GALT1|HIF1A|NDST1|HYAL1|MAN1A1|MAN2A1|MGAT5|PAWR|SEL1L|ST6GAL1|UBE2G2|DPM2|B4GALT5|CHST3|HS3ST3B1|ABCA7|PARK7|CHSY1|SDF2L1|DSE|CHST15|DPM3|CSGALNACT2|ENGASE|GNPTAB|GAL3ST4|ADAMTS12|B3GNT5|POMK|FBXO44|GALNT15|TMTC3|FUT11|KRTCAP2|ST6GALNAC3|GXYLT2	-1.48409	0	33	1	1	-3.78704	4.47729
1	-3.71602	GO:0009199	M1	1	0	GO Biological Processes	19	ribonucleoside triphosphate metabolic process	-3.71602	1.93447	4.05129	24155	341	1245	34	2.73092	0.46191	509|516|517|521|522|523|539|1350|3091|3098|3312|4695|4700|4716|4718|4725|4728|4729|4731|4832|4928|4976|6774|8086|10476|10632|11315|26137|27089|29796|51715|57017|93974|441531	ATP5F1C|ATP5MC1|ATP5MC2|ATP5ME|ATP5PF|ATP6V1A|ATP5PO|COX7C|HIF1A|HK1|HSPA8|NDUFA2|NDUFA6|NDUFB10|NDUFC2|NDUFS5|NDUFS8|NDUFV2|NDUFV3|NME3|NUP98|OPA1|STAT3|AAAS|ATP5PD|ATP5MG|PARK7|ZBTB20|UQCRQ|UQCR10|RAB23|COQ9|ATP5IF1|PGAM4	-1.41853	0	9	0	0	-5.12475	3.52756
1	-3.69204	GO:0007599	M1	1	0	GO Biological Processes	19	hemostasis	-3.69204	1.92881	4.03275	24155	342	1245	34	2.73092	0.46191	87|857|1281|2149|2162|2767|3690|3717|4627|5028|5054|5156|5290|5291|5294|5295|5781|5912|7056|7057|7094|7099|7391|7975|10019|10672|23414|25970|30845|55330|80856|139818|160851|196527	ACTN1|CAV1|COL3A1|F2R|F13A1|GNA11|ITGB3|JAK2|MYH9|P2RY1|SERPINE1|PDGFRA|PIK3CA|PIK3CB|PIK3CG|PIK3R1|PTPN11|RAP2B|THBD|THBS1|TLN1|TLR4|USF1|MAFK|SH2B3|GNA13|ZFPM2|SH2B1|EHD3|BLOC1S4|LNPK|DOCK11|DGKH|ANO6	-1.39995	0	22	0	0	-4.35418	3.2336
1	-3.66013	GO:0010634	M1	1	0	GO Biological Processes	19	positive regulation of epithelial cell migration	-3.66013	2.3688	4.19971	24155	172	1245	21	1.68675	0.364961	382|2113|2246|3091|3373|3690|5168|6678|6868|7010|7057|8754|8828|8829|10000|10016|10519|25960|57381|57608|147372	ARF6|ETS1|FGF1|HIF1A|HYAL1|ITGB3|ENPP2|SPARC|ADAM17|TEK|THBS1|ADAM9|NRP2|NRP1|AKT3|PDCD6|CIB1|ADGRA2|RHOJ|JCAD|CCBE1	-1.38383	0	1	0	0	-8.54717	2.5568
1	-3.66386	GO:0021957	M1	1	0	GO Biological Processes	19	corticospinal tract morphogenesis	-3.66386	11.0866	6.22188	24155	7	1245	4	0.321285	0.160384	1009|9353|9839|51199	CDH11|SLIT2|ZEB2|NIN	-1.38383	0	17	0	0	-4.62037	12.9344
1	-3.6682	GO:0050817	M1	1	0	GO Biological Processes	19	coagulation	-3.6682	1.92319	4.01428	24155	343	1245	34	2.73092	0.46191	87|857|1281|2149|2162|2767|3690|3717|4627|5028|5054|5156|5290|5291|5294|5295|5781|5912|7056|7057|7094|7099|7391|7975|10019|10672|23414|25970|30845|55330|80856|139818|160851|196527	ACTN1|CAV1|COL3A1|F2R|F13A1|GNA11|ITGB3|JAK2|MYH9|P2RY1|SERPINE1|PDGFRA|PIK3CA|PIK3CB|PIK3CG|PIK3R1|PTPN11|RAP2B|THBD|THBS1|TLN1|TLR4|USF1|MAFK|SH2B3|GNA13|ZFPM2|SH2B1|EHD3|BLOC1S4|LNPK|DOCK11|DGKH|ANO6	-1.38383	0	22	0	0	-4.35418	3.2336
1	-3.63122	GO:0051347	M1	1	0	GO Biological Processes	19	positive regulation of transferase activity	-3.63122	1.63915	3.85381	24155	651	1245	55	4.41767	0.582372	904|1398|1436|1464|1636|1739|2081|2149|2246|2321|2357|2358|3084|3672|3690|3717|4515|4921|5062|5156|5159|5290|5291|5294|5621|5781|5899|6176|6787|6868|7010|7057|7099|8754|8792|8797|9618|9839|10519|10746|10899|11183|11315|23118|28956|29990|30849|51149|54165|55208|57551|80829|92345|114882|151636	CCNT1|CRK|CSF1R|CSPG4|ACE|DLG1|ERN1|F2R|FGF1|FLT1|FPR1|FPR2|NRG1|ITGA1|ITGB3|JAK2|MTCP1|DDR2|PAK2|PDGFRA|PDGFRB|PIK3CA|PIK3CB|PIK3CG|PRNP|PTPN11|RALB|RPLP1|NEK4|ADAM17|TEK|THBS1|TLR4|ADAM9|TNFRSF11A|TNFRSF10A|TRAF4|ZEB2|CIB1|MAP3K2|JTB|MAP4K5|PARK7|TAB2|LAMTOR2|PILRB|PIK3R4|MRNIP|DCUN1D1|DCUN1D2|TAOK1|ZFP91|NAF1|OSBPL8|DTX3L	-1.36006	0	20	0	0	-4.49707	1.86442
1	-3.61525	GO:0097191	M1	1	0	GO Biological Processes	19	extrinsic apoptotic signaling pathway	-3.61525	2.16536	4.08479	24155	224	1245	25	2.00803	0.397554	367|842|857|2140|2932|3624|3685|3717|5054|5062|5295|6478|6498|6591|7057|8406|8797|8829|8996|9821|10413|10519|11315|26060|55367	AR|CASP9|CAV1|EYA3|GSK3B|INHBA|ITGAV|JAK2|SERPINE1|PAK2|PIK3R1|SIAH2|SKIL|SNAI2|THBS1|SRPX|TNFRSF10A|NRP1|NOL3|RB1CC1|YAP1|CIB1|PARK7|APPL1|PIDD1	-1.34917	0	34	1	1	-3.61525	2.4252
1	-3.57518	GO:0010837	M1	1	0	GO Biological Processes	19	regulation of keratinocyte proliferation	-3.57518	4.56508	4.84929	24155	34	1245	8	0.64257	0.226452	687|1948|5469|5796|6591|10413|126695|135228	KLF9|EFNB2|MED1|PTPRK|SNAI2|YAP1|KDF1|CD109	-1.3415	0	5	0	0	-5.90668	10.447
1	-3.5879	GO:0046034	M1	1	0	GO Biological Processes	19	ATP metabolic process	-3.5879	1.97197	3.98221	24155	305	1245	31	2.48996	0.441607	509|516|517|521|522|523|539|1350|3091|3098|3312|4695|4700|4716|4718|4725|4728|4729|4731|4928|6774|8086|10476|10632|11315|26137|27089|29796|57017|93974|441531	ATP5F1C|ATP5MC1|ATP5MC2|ATP5ME|ATP5PF|ATP6V1A|ATP5PO|COX7C|HIF1A|HK1|HSPA8|NDUFA2|NDUFA6|NDUFB10|NDUFC2|NDUFS5|NDUFS8|NDUFV2|NDUFV3|NUP98|STAT3|AAAS|ATP5PD|ATP5MG|PARK7|ZBTB20|UQCRQ|UQCR10|COQ9|ATP5IF1|PGAM4	-1.3415	0	9	0	0	-5.12475	3.52756
1	-3.5812	GO:0045860	M1	1	0	GO Biological Processes	19	positive regulation of protein kinase activity	-3.5812	1.70763	3.85474	24155	534	1245	47	3.7751	0.540161	904|1398|1436|1464|1636|1739|2081|2149|2246|2321|2357|3084|3672|3690|3717|4515|4921|5062|5159|5290|5291|5294|5621|5781|5899|6176|6787|6868|7057|7099|8754|8792|8797|9618|9839|10519|10746|10899|11183|11315|23118|28956|29990|51149|57551|80829|114882	CCNT1|CRK|CSF1R|CSPG4|ACE|DLG1|ERN1|F2R|FGF1|FLT1|FPR1|NRG1|ITGA1|ITGB3|JAK2|MTCP1|DDR2|PAK2|PDGFRB|PIK3CA|PIK3CB|PIK3CG|PRNP|PTPN11|RALB|RPLP1|NEK4|ADAM17|THBS1|TLR4|ADAM9|TNFRSF11A|TNFRSF10A|TRAF4|ZEB2|CIB1|MAP3K2|JTB|MAP4K5|PARK7|TAB2|LAMTOR2|PILRB|MRNIP|TAOK1|ZFP91|OSBPL8	-1.3415	0	20	0	0	-4.49707	1.86442
1	-3.57518	GO:0017004	M1	1	0	GO Biological Processes	19	cytochrome complex assembly	-3.57518	4.56508	4.84929	24155	34	1245	8	0.64257	0.226452	617|9997|28958|29796|51287|90639|285521|493753	BCS1L|SCO2|COA3|UQCR10|COA4|COX19|COX18|COA5	-1.3415	0	21	0	0	-4.39037	6.79056
1	-3.5736	GO:0008360	M1	1	0	GO Biological Processes	19	regulation of cell shape	-3.5736	2.45754	4.17427	24155	150	1245	19	1.5261	0.347431	755|1398|1436|1739|2335|4627|5028|10154|10672|10979|11149|23191|30011|55742|57381|91584|93663|152273|445815	CFAP410|CRK|CSF1R|DLG1|FN1|MYH9|P2RY1|PLXNC1|GNA13|FERMT2|BVES|CYFIP1|SH3KBP1|PARVA|RHOJ|PLXNA4|ARHGAP18|FGD5|PALM2AKAP2	-1.3415	0	28	0	0	-3.98701	2.45754
1	-3.57985	GO:0030194	M1	1	0	GO Biological Processes	19	positive regulation of blood coagulation	-3.57985	5.22351	5.02293	24155	26	1245	7	0.562249	0.211912	2149|5054|7056|7057|7099|7391|196527	F2R|SERPINE1|THBD|THBS1|TLR4|USF1|ANO6	-1.3415	0	35	1	1	-3.57985	7.76064
1	-3.57985	GO:1900048	M1	1	0	GO Biological Processes	19	positive regulation of hemostasis	-3.57985	5.22351	5.02293	24155	26	1245	7	0.562249	0.211912	2149|5054|7056|7057|7099|7391|196527	F2R|SERPINE1|THBD|THBS1|TLR4|USF1|ANO6	-1.3415	0	35	0	0	-3.57985	7.76064
1	-3.56297	GO:1904375	M1	1	0	GO Biological Processes	19	regulation of protein localization to cell periphery	-3.56297	2.69935	4.25826	24155	115	1245	16	1.28514	0.319214	102|367|382|1739|2037|2048|4035|4323|5295|5621|6711|10082|10519|11079|26060|27237	ADAM10|AR|ARF6|DLG1|EPB41L2|EPHB2|LRP1|MMP14|PIK3R1|PRNP|SPTBN1|GPC6|CIB1|RER1|APPL1|ARHGEF16	-1.33552	0	26	0	0	-4.08148	3.46457
1	-3.54693	GO:0032092	M1	1	0	GO Biological Processes	19	positive regulation of protein binding	-3.54693	2.92067	4.32609	24155	93	1245	14	1.1245	0.29884	382|857|1636|2932|4035|5899|6135|8829|9618|11315|23228|28996|51068|151636	ARF6|CAV1|ACE|GSK3B|LRP1|RALB|RPL11|NRP1|TRAF4|PARK7|PLCL2|HIPK2|NMD3|DTX3L	-1.32863	0	23	0	0	-4.20995	2.92067
1	-3.55094	GO:0035728	M1	1	0	GO Biological Processes	19	response to hepatocyte growth factor	-3.55094	6.12682	5.21146	24155	19	1245	6	0.481928	0.196272	1385|1398|5469|8829|26060|81792	CREB1|CRK|MED1|NRP1|APPL1|ADAMTS12	-1.32863	0	36	1	1	-3.55094	6.4672
1	-3.50311	GO:0007229	M1	1	0	GO Biological Processes	19	integrin-mediated signaling pathway	-3.50311	2.77166	4.24115	24155	105	1245	15	1.20482	0.309203	102|1281|2530|3672|3676|3685|3690|3693|4627|5781|7094|8516|8754|8829|10979	ADAM10|COL3A1|FUT8|ITGA1|ITGA4|ITGAV|ITGB3|ITGB5|MYH9|PTPN11|TLN1|ITGA8|ADAM9|NRP1|FERMT2	-1.2893	0	37	1	1	-3.50311	2.77166
1	-3.48878	GO:0002444	M1	1	0	GO Biological Processes	19	myeloid leukocyte mediated immunity	-3.48878	1.68101	3.78013	24155	554	1245	48	3.85542	0.545649	102|960|1636|1773|2212|2241|2357|2358|2683|3312|3482|3685|4718|5294|5478|5660|5708|5724|5878|5912|6093|6868|7077|7879|8635|8694|8832|9188|10097|10312|10450|11031|11322|22918|23191|23200|23317|25852|28956|51552|53916|53917|79169|83858|158747|170506|196527|374395	ADAM10|CD44|ACE|DNASE1|FCGR2A|FER|FPR1|FPR2|B4GALT1|HSPA8|IGF2R|ITGAV|NDUFC2|PIK3CG|PPIA|PSAP|PSMD2|PTAFR|RAB5C|RAP2B|ROCK1|ADAM17|TIMP2|RAB7A|RNASET2|DGAT1|CD84|DDX21|ACTR2|TCIRG1|PPIE|RAB31|TMC6|CD93|CYFIP1|ATP11B|DNAJC13|ARMC8|LAMTOR2|RAB14|RAB4B|RAB24|C1orf35|ATAD3B|MOSPD2|DHX36|ANO6|TMEM179B	-1.27943	0	38	1	1	-3.48878	1.68101
1	-3.46884	GO:1904377	M1	1	0	GO Biological Processes	19	positive regulation of protein localization to cell periphery	-3.46884	3.38758	4.42343	24155	63	1245	11	0.883534	0.265216	382|1739|2037|2048|4035|5295|5621|6711|10519|11079|27237	ARF6|DLG1|EPB41L2|EPHB2|LRP1|PIK3R1|PRNP|SPTBN1|CIB1|RER1|ARHGEF16	-1.26827	0	26	0	0	-4.08148	3.46457
1	-3.46915	GO:0050820	M1	1	0	GO Biological Processes	19	positive regulation of coagulation	-3.46915	5.03005	4.88425	24155	27	1245	7	0.562249	0.211912	2149|5054|7056|7057|7099|7391|196527	F2R|SERPINE1|THBD|THBS1|TLR4|USF1|ANO6	-1.26827	0	35	0	0	-3.57985	7.76064
1	-3.46272	GO:0010595	M1	1	0	GO Biological Processes	19	positive regulation of endothelial cell migration	-3.46272	2.5568	4.13289	24155	129	1245	17	1.36546	0.328904	2113|2246|3091|3690|6678|6868|7010|7057|8828|8829|10000|10016|10519|25960|57381|57608|147372	ETS1|FGF1|HIF1A|ITGB3|SPARC|ADAM17|TEK|THBS1|NRP2|NRP1|AKT3|PDCD6|CIB1|ADGRA2|RHOJ|JCAD|CCBE1	-1.26646	0	1	0	0	-8.54717	2.5568
1	-3.40714	GO:0044257	M1	1	0	GO Biological Processes	19	cellular protein catabolic process	-3.40714	1.55614	3.66356	24155	773	1245	62	4.97992	0.616502	550|857|2932|3949|4035|5708|6135|6400|6478|7327|7328|7879|9113|9320|9690|9827|10134|10312|11101|11315|11342|22954|23753|25852|25906|26233|27246|28996|51035|51160|51608|54467|55139|55336|56254|57563|57589|64682|64750|79016|79176|79718|80011|80279|81792|83737|83892|84236|84640|84993|90864|91544|93611|93974|118424|130617|151636|158880|160418|165918|219333|253980	AUP1|CAV1|GSK3B|LDLR|LRP1|PSMD2|RPL11|SEL1L|SIAH2|UBE2G2|UBE2H|RAB7A|LATS1|TRIP12|UBE3C|RGP1|BCAP31|TCIRG1|ATE1|PARK7|RNF13|TRIM32|SDF2L1|ARMC8|ANAPC15|FBXL6|RNF115|HIPK2|UBXN1|VPS28|GET4|ANKIB1|ANKZF1|FBXL8|RNF20|KLHL8|RIC1|ANAPC1|SMURF2|DDA1|FBXL15|TBL1XR1|FAM192A|CDK5RAP3|ADAMTS12|ITCH|KCTD10|RHBDD1|USP38|UBL7|SPSB3|UBXN11|FBXO44|ATP5IF1|UBE2J2|ZFAND2B|DTX3L|USP51|TMTC3|RNF168|USP12|KCTD13	-1.21533	0	39	1	1	-3.40714	1.7524
1	-3.40307	GO:0050772	M1	1	0	GO Biological Processes	19	positive regulation of axonogenesis	-3.40307	2.9673	4.23555	24155	85	1245	13	1.04418	0.288087	2335|4035|4131|5048|6498|8829|9353|9839|10154|23191|51199|91584|118813	FN1|LRP1|MAP1B|PAFAH1B1|SKIL|NRP1|SLIT2|ZEB2|PLXNC1|CYFIP1|NIN|PLXNA4|ZFYVE27	-1.21533	0	40	1	1	-3.40307	3.1584
1	-3.39313	GO:0000154	M1	1	0	GO Biological Processes	19	rRNA modification	-3.39313	4.31147	4.6351	24155	36	1245	8	0.64257	0.226452	27079|51093|55695|63899|79922|92345|155400|260294	RPUSD2|RRNAD1|NSUN5|NSUN3|MRM1|NAF1|NSUN5P1|NSUN5P2	-1.20959	0	41	1	1	-3.39313	4.31147
1	-3.38584	GO:0032456	M1	1	0	GO Biological Processes	19	endocytic recycling	-3.38584	3.88032	4.50833	24155	45	1245	9	0.722892	0.240091	382|10123|11149|22853|23527|30845|51552|79778|163486	ARF6|ARL4C|BVES|LMTK2|ACAP2|EHD3|RAB14|MICALL2|DENND1B	-1.20646	0	42	1	1	-3.38584	3.88032
1	-3.38096	GO:0038027	M1	1	0	GO Biological Processes	19	apolipoprotein A-I-mediated signaling pathway	-3.38096	9.7008	5.73772	24155	8	1245	4	0.321285	0.160384	19|3685|3690|10347	ABCA1|ITGAV|ITGB3|ABCA7	-1.20569	0	43	1	1	-3.38096	9.7008
1	-3.34911	GO:0006120	M1	1	0	GO Biological Processes	19	mitochondrial electron transport, NADH to ubiquinone	-3.34911	3.52756	4.37463	24155	55	1245	10	0.803213	0.252976	4695|4700|4716|4718|4725|4728|4729|4731|11315|57017	NDUFA2|NDUFA6|NDUFB10|NDUFC2|NDUFS5|NDUFS8|NDUFV2|NDUFV3|PARK7|COQ9	-1.17791	0	9	0	0	-5.12475	3.52756
1	-3.31442	GO:0051493	M1	1	0	GO Biological Processes	19	regulation of cytoskeleton organization	-3.31442	1.6713	3.65683	24155	534	1245	46	3.69478	0.534607	382|636|1398|1436|1739|1901|2241|2764|2932|4035|4131|4690|5048|5156|5159|5295|5987|6093|6711|7010|8045|8558|8829|9113|9353|9530|10097|10274|10519|10787|23116|23191|25932|50944|51199|57381|57551|79598|79969|80206|84501|89795|91624|93663|157922|374666	ARF6|BICD1|CRK|CSF1R|DLG1|S1PR1|FER|GMFB|GSK3B|LRP1|MAP1B|NCK1|PAFAH1B1|PDGFRA|PDGFRB|PIK3R1|TRIM27|ROCK1|SPTBN1|TEK|RASSF7|CDK10|NRP1|LATS1|SLIT2|BAG4|ACTR2|STAG1|CIB1|NCKAP1|TOGARAM1|CYFIP1|CLIC4|SHANK1|NIN|RHOJ|TAOK1|CEP97|ATAT1|FHOD3|SPIRE2|NAV3|NEXN|ARHGAP18|CAMSAP1|WASH3P	-1.14727	0	16	0	0	-4.67817	3.2336
1	-3.2967	GO:0072659	M1	1	0	GO Biological Processes	19	protein localization to plasma membrane	-3.2967	1.9994	3.7916	24155	262	1245	27	2.16867	0.412811	367|382|1739|2048|4035|4323|4644|5028|5295|5621|6093|6711|9530|10098|10484|10519|10640|11031|11079|25837|26060|26088|27237|30845|51735|55667|118813	AR|ARF6|DLG1|EPHB2|LRP1|MMP14|MYO5A|P2RY1|PIK3R1|PRNP|ROCK1|SPTBN1|BAG4|TSPAN5|SEC23A|CIB1|EXOC5|RAB31|RER1|RAB26|APPL1|GGA1|ARHGEF16|EHD3|RAPGEF6|DENND4C|ZFYVE27	-1.13752	0	26	0	0	-4.08148	3.46457
1	-3.30062	GO:0090305	M1	1	0	GO Biological Processes	19	nucleic acid phosphodiester bond hydrolysis	-3.30062	1.92095	3.76064	24155	303	1245	30	2.40964	0.434605	1677|1773|1797|2081|2967|3836|5168|5883|5981|8635|9131|10146|22803|25939|30834|51013|51077|51163|51367|54059|54464|54932|55728|64852|79008|79703|128387|131870|400410|404672	DFFB|DNASE1|DXO|ERN1|GTF2H3|KPNA1|ENPP2|RAD9A|RFC1|RNASET2|AIFM1|G3BP1|XRN2|SAMHD1|ZNRD1|EXOSC1|FCF1|DBR1|POP5|YBEY|XRN1|EXD3|N4BP2|TUT1|SLX1B|C11orf80|TATDN3|NUDT16|ST20|GTF2H5	-1.13752	0	44	1	1	-3.30062	1.92095
1	-3.28394	GO:1903078	M1	1	0	GO Biological Processes	19	positive regulation of protein localization to plasma membrane	-3.28394	3.46457	4.3043	24155	56	1245	10	0.803213	0.252976	382|1739|2048|4035|5295|5621|6711|10519|11079|27237	ARF6|DLG1|EPHB2|LRP1|PIK3R1|PRNP|SPTBN1|CIB1|RER1|ARHGEF16	-1.13586	0	26	0	0	-4.08148	3.46457
1	-3.27953	GO:0090210	M1	1	0	GO Biological Processes	19	regulation of establishment of blood-brain barrier	-3.27953	14.5512	6.3184	24155	4	1245	3	0.240964	0.138953	7442|8434|25960	TRPV1|RECK|ADGRA2	-1.13586	0	45	1	1	-3.27953	14.5512
1	-3.27953	GO:0097749	M1	1	0	GO Biological Processes	19	membrane tubulation	-3.27953	14.5512	6.3184	24155	4	1245	3	0.240964	0.138953	4976|23023|23603	OPA1|TMCC1|CORO1C	-1.13586	0	46	1	1	-3.27953	14.5512
1	-3.27953	GO:1904209	M1	1	0	GO Biological Processes	19	positive regulation of chemokine (C-C motif) ligand 2 secretion	-3.27953	14.5512	6.3184	24155	4	1245	3	0.240964	0.138953	4035|4155|10631	LRP1|MBP|POSTN	-1.13586	0	47	1	1	-3.27953	14.5512
1	-3.27042	GO:0006022	M1	1	0	GO Biological Processes	19	aminoglycan metabolic process	-3.27042	2.26919	3.88268	24155	171	1245	20	1.60643	0.356311	960|1464|2132|2683|3340|3373|5159|9334|9469|9953|10082|10894|22856|23670|29940|51363|54982|55454|84002|129530	CD44|CSPG4|EXT2|B4GALT1|NDST1|HYAL1|PDGFRB|B4GALT5|CHST3|HS3ST3B1|GPC6|LYVE1|CHSY1|CEMIP2|DSE|CHST15|CLN6|CSGALNACT2|B3GNT5|LYG1	-1.13054	0	33	0	0	-3.78704	4.47729
1	-3.26049	GO:2000779	M1	1	0	GO Biological Processes	19	regulation of double-strand break repair	-3.26049	3.02363	4.14603	24155	77	1245	12	0.963855	0.276897	9320|9400|10097|51149|55183|55611|84309|84501|131870|151636|151987|158880	TRIP12|RECQL5|ACTR2|MRNIP|RIF1|OTUB1|NUDT16L1|SPIRE2|NUDT16|DTX3L|PPP4R2|USP51	-1.12437	0	30	0	0	-3.92727	4.8504
1	-3.25384	GO:0032147	M1	1	0	GO Biological Processes	19	activation of protein kinase activity	-3.25384	1.86442	3.70274	24155	333	1245	32	2.57028	0.448489	1398|1464|1739|2081|2149|2246|2357|3084|3672|3690|3717|5062|5290|5291|5621|5781|6176|6787|7057|7099|8754|8797|9618|10746|11183|11315|23118|28956|29990|57551|80829|114882	CRK|CSPG4|DLG1|ERN1|F2R|FGF1|FPR1|NRG1|ITGA1|ITGB3|JAK2|PAK2|PIK3CA|PIK3CB|PRNP|PTPN11|RPLP1|NEK4|THBS1|TLR4|ADAM9|TNFRSF10A|TRAF4|MAP3K2|MAP4K5|PARK7|TAB2|LAMTOR2|PILRB|TAOK1|ZFP91|OSBPL8	-1.12145	0	20	0	0	-4.49707	1.86442
1	-3.21802	GO:0030203	M1	1	0	GO Biological Processes	19	glycosaminoglycan metabolic process	-3.21802	2.30394	3.85766	24155	160	1245	19	1.5261	0.347431	960|1464|2132|2683|3340|3373|5159|9334|9469|9953|10082|10894|22856|23670|29940|51363|54982|55454|129530	CD44|CSPG4|EXT2|B4GALT1|NDST1|HYAL1|PDGFRB|B4GALT5|CHST3|HS3ST3B1|GPC6|LYVE1|CHSY1|CEMIP2|DSE|CHST15|CLN6|CSGALNACT2|LYG1	-1.08932	0	33	0	0	-3.78704	4.47729
1	-3.21196	GO:0120039	M1	1	0	GO Biological Processes	19	plasma membrane bounded cell projection morphogenesis	-3.21196	1.58261	3.54326	24155	662	1245	54	4.33735	0.577296	102|960|1009|1385|1436|1944|1948|2048|2335|2932|3110|3672|3676|4035|4131|4976|5048|5168|5290|5291|5295|5781|6093|6259|6498|6586|6711|7204|8609|8633|8828|8829|9252|9334|9353|9839|10097|10154|10631|10787|11313|23022|23191|23603|23768|26037|30011|50944|51199|91584|91624|113246|118813|170506	ADAM10|CD44|CDH11|CREB1|CSF1R|EFNA3|EFNB2|EPHB2|FN1|GSK3B|MNX1|ITGA1|ITGA4|LRP1|MAP1B|OPA1|PAFAH1B1|ENPP2|PIK3CA|PIK3CB|PIK3R1|PTPN11|ROCK1|RYK|SKIL|SLIT3|SPTBN1|TRIO|KLF7|UNC5C|NRP2|NRP1|RPS6KA5|B4GALT5|SLIT2|ZEB2|ACTR2|PLXNC1|POSTN|NCKAP1|LYPLA2|PALLD|CYFIP1|CORO1C|FLRT2|SIPA1L1|SH3KBP1|SHANK1|NIN|PLXNA4|NEXN|C12orf57|ZFYVE27|DHX36	-1.08693	0	2	0	0	-7.50906	1.96166
1	-3.17889	GO:0016072	M1	1	0	GO Biological Processes	19	rRNA metabolic process	-3.17889	1.99384	3.70448	24155	253	1245	26	2.08835	0.405261	6135|8568|9188|9329|22803|27079|51013|51077|51093|51367|51547|54059|54464|54606|54663|55272|55695|63899|79922|92345|131870|153443|155400|260294|284119|404672	RPL11|RRP1|DDX21|GTF3C4|XRN2|RPUSD2|EXOSC1|FCF1|RRNAD1|POP5|SIRT7|YBEY|XRN1|DDX56|WDR74|IMP3|NSUN5|NSUN3|MRM1|NAF1|NUDT16|SRFBP1|NSUN5P1|NSUN5P2|CAVIN1|GTF2H5	-1.05749	0	41	0	0	-3.39313	4.31147
1	-3.16903	GO:0030865	M1	1	0	GO Biological Processes	19	cortical cytoskeleton organization	-3.16903	3.6378	4.2644	24155	48	1245	9	0.722892	0.240091	382|1739|2037|3993|5048|6093|6242|7094|10787	ARF6|DLG1|EPB41L2|LLGL2|PAFAH1B1|ROCK1|RTKN|TLN1|NCKAP1	-1.05124	0	48	1	1	-3.16903	3.6378
1	-3.16181	GO:0007409	M1	1	0	GO Biological Processes	19	axonogenesis	-3.16181	1.69971	3.56332	24155	468	1245	41	3.29317	0.505768	1009|1385|1436|1944|1948|2048|2335|2932|3676|4035|4131|5048|5290|5291|5295|5781|6259|6498|6586|6711|7204|8609|8633|8828|8829|9252|9334|9353|9839|10154|11313|23022|23191|23768|26037|30011|51199|91584|91624|113246|118813	CDH11|CREB1|CSF1R|EFNA3|EFNB2|EPHB2|FN1|GSK3B|ITGA4|LRP1|MAP1B|PAFAH1B1|PIK3CA|PIK3CB|PIK3R1|PTPN11|RYK|SKIL|SLIT3|SPTBN1|TRIO|KLF7|UNC5C|NRP2|NRP1|RPS6KA5|B4GALT5|SLIT2|ZEB2|PLXNC1|LYPLA2|PALLD|CYFIP1|FLRT2|SIPA1L1|SH3KBP1|NIN|PLXNA4|NEXN|C12orf57|ZFYVE27	-1.0476	0	2	0	0	-7.50906	1.96166
1	-3.15131	GO:0048858	M1	1	0	GO Biological Processes	19	cell projection morphogenesis	-3.15131	1.5731	3.49627	24155	666	1245	54	4.33735	0.577296	102|960|1009|1385|1436|1944|1948|2048|2335|2932|3110|3672|3676|4035|4131|4976|5048|5168|5290|5291|5295|5781|6093|6259|6498|6586|6711|7204|8609|8633|8828|8829|9252|9334|9353|9839|10097|10154|10631|10787|11313|23022|23191|23603|23768|26037|30011|50944|51199|91584|91624|113246|118813|170506	ADAM10|CD44|CDH11|CREB1|CSF1R|EFNA3|EFNB2|EPHB2|FN1|GSK3B|MNX1|ITGA1|ITGA4|LRP1|MAP1B|OPA1|PAFAH1B1|ENPP2|PIK3CA|PIK3CB|PIK3R1|PTPN11|ROCK1|RYK|SKIL|SLIT3|SPTBN1|TRIO|KLF7|UNC5C|NRP2|NRP1|RPS6KA5|B4GALT5|SLIT2|ZEB2|ACTR2|PLXNC1|POSTN|NCKAP1|LYPLA2|PALLD|CYFIP1|CORO1C|FLRT2|SIPA1L1|SH3KBP1|SHANK1|NIN|PLXNA4|NEXN|C12orf57|ZFYVE27|DHX36	-1.04064	0	2	0	0	-7.50906	1.96166
1	-3.14379	GO:0098926	M1	1	0	GO Biological Processes	19	postsynaptic signal transduction	-3.14379	8.62294	5.33197	24155	9	1245	4	0.321285	0.160384	3084|3717|3836|6774	NRG1|JAK2|KPNA1|STAT3	-1.04012	0	49	1	1	-3.14379	8.62294
1	-3.14379	GO:0099527	M1	1	0	GO Biological Processes	19	postsynapse to nucleus signaling pathway	-3.14379	8.62294	5.33197	24155	9	1245	4	0.321285	0.160384	3084|3717|3836|6774	NRG1|JAK2|KPNA1|STAT3	-1.04012	0	49	0	0	-3.14379	8.62294
1	-3.13339	GO:0051092	M1	1	0	GO Biological Processes	19	positive regulation of NF-kappaB transcription factor activity	-3.13339	2.32819	3.80384	24155	150	1245	18	1.44578	0.338302	367|857|2241|4791|4919|6774|7099|8792|9252|10519|11043|22954|23085|23118|55367|56919|92140|114548	AR|CAV1|FER|NFKB2|ROR1|STAT3|TLR4|TNFRSF11A|RPS6KA5|CIB1|MID2|TRIM32|ERC1|TAB2|PIDD1|DHX33|MTDH|NLRP3	-1.03318	0	50	1	1	-3.13339	2.32819
1	-3.12197	GO:0051056	M1	1	0	GO Biological Processes	19	regulation of small GTPase mediated signal transduction	-3.12197	1.83142	3.59379	24155	339	1245	32	2.57028	0.448489	19|382|394|1281|1398|2048|2149|3084|3717|5159|5922|5924|6655|7077|7204|8829|9353|9754|10672|23362|26037|27237|27352|57186|57381|57493|57584|83892|89941|93663|152273|253980	ABCA1|ARF6|ARHGAP5|COL3A1|CRK|EPHB2|F2R|NRG1|JAK2|PDGFRB|RASA2|RASGRF2|SOS2|TIMP2|TRIO|NRP1|SLIT2|STARD8|GNA13|PSD3|SIPA1L1|ARHGEF16|SGSM3|RALGAPA2|RHOJ|HEG1|ARHGAP21|KCTD10|RHOT2|ARHGAP18|FGD5|KCTD13	-1.02861	0	13	0	0	-4.84468	1.90212
1	-3.12312	GO:0002446	M1	1	0	GO Biological Processes	19	neutrophil mediated immunity	-3.12312	1.66854	3.52141	24155	500	1245	43	3.45382	0.517526	102|960|1636|1773|2212|2357|2358|2683|3312|3482|3685|4718|5478|5660|5708|5724|5878|5912|6093|6868|7077|7879|8635|8694|10097|10312|10450|11031|11322|22918|23191|23200|23317|25852|28956|51552|53916|53917|79169|83858|158747|196527|374395	ADAM10|CD44|ACE|DNASE1|FCGR2A|FPR1|FPR2|B4GALT1|HSPA8|IGF2R|ITGAV|NDUFC2|PPIA|PSAP|PSMD2|PTAFR|RAB5C|RAP2B|ROCK1|ADAM17|TIMP2|RAB7A|RNASET2|DGAT1|ACTR2|TCIRG1|PPIE|RAB31|TMC6|CD93|CYFIP1|ATP11B|DNAJC13|ARMC8|LAMTOR2|RAB14|RAB4B|RAB24|C1orf35|ATAD3B|MOSPD2|ANO6|TMEM179B	-1.02861	0	38	0	0	-3.48878	1.68101
1	-3.10262	GO:0006839	M1	1	0	GO Biological Processes	19	mitochondrial transport	-3.10262	1.97048	3.63899	24155	256	1245	26	2.08835	0.405261	509|516|517|521|522|539|1386|2932|4976|5599|6774|7529|7755|8996|9530|10476|10632|10651|29957|54543|79778|81894|89941|93974|118424|123096	ATP5F1C|ATP5MC1|ATP5MC2|ATP5ME|ATP5PF|ATP5PO|ATF2|GSK3B|OPA1|MAPK8|STAT3|YWHAB|ZNF205|NOL3|BAG4|ATP5PD|ATP5MG|MTX2|SLC25A24|TOMM7|MICALL2|SLC25A28|RHOT2|ATP5IF1|UBE2J2|SLC25A29	-1.01264	0	8	0	0	-5.12745	6.74838
1	-3.07907	GO:0009167	M1	1	0	GO Biological Processes	19	purine ribonucleoside monophosphate metabolic process	-3.07907	1.82068	3.55796	24155	341	1245	32	2.57028	0.448489	509|516|517|521|522|523|539|1350|1739|3091|3098|3312|4695|4700|4716|4718|4725|4728|4729|4731|4928|6774|8086|10476|10632|11315|26137|27089|29796|57017|93974|441531	ATP5F1C|ATP5MC1|ATP5MC2|ATP5ME|ATP5PF|ATP6V1A|ATP5PO|COX7C|DLG1|HIF1A|HK1|HSPA8|NDUFA2|NDUFA6|NDUFB10|NDUFC2|NDUFS5|NDUFS8|NDUFV2|NDUFV3|NUP98|STAT3|AAAS|ATP5PD|ATP5MG|PARK7|ZBTB20|UQCRQ|UQCR10|COQ9|ATP5IF1|PGAM4	-0.997651	0	9	0	0	-5.12475	3.52756
1	-3.07706	GO:0006023	M1	1	0	GO Biological Processes	19	aminoglycan biosynthetic process	-3.07706	2.53064	3.83551	24155	115	1245	15	1.20482	0.309203	1464|2132|2683|3340|3373|5159|9334|9469|9953|10082|22856|29940|51363|55454|84002	CSPG4|EXT2|B4GALT1|NDST1|HYAL1|PDGFRB|B4GALT5|CHST3|HS3ST3B1|GPC6|CHSY1|DSE|CHST15|CSGALNACT2|B3GNT5	-0.997651	0	33	0	0	-3.78704	4.47729
1	-3.07606	GO:0010762	M1	1	0	GO Biological Processes	19	regulation of fibroblast migration	-3.07606	4.38101	4.39106	24155	31	1245	7	0.562249	0.211912	2241|4921|6546|7057|9530|23603|26060	FER|DDR2|SLC8A1|THBS1|BAG4|CORO1C|APPL1	-0.997651	0	51	1	1	-3.07606	5.96973
1	-3.07112	GO:0006914	M1	1	0	GO Biological Processes	19	autophagy	-3.07112	1.65859	3.4796	24155	503	1245	43	3.45382	0.517526	523|1981|1982|2081|2932|3091|3312|5290|5291|5599|5660|5899|6093|6625|6774|7879|8406|8832|9711|9821|10312|10641|11043|11315|23118|25989|26276|28956|29100|30849|51160|51368|51715|53349|53917|54543|64121|84148|89849|92140|93974|245973|100188893	ATP6V1A|EIF4G1|EIF4G2|ERN1|GSK3B|HIF1A|HSPA8|PIK3CA|PIK3CB|MAPK8|PSAP|RALB|ROCK1|SNRNP70|STAT3|RAB7A|SRPX|CD84|RUBCN|RB1CC1|TCIRG1|NPRL2|MID2|PARK7|TAB2|ULK3|VPS33B|LAMTOR2|TMEM208|PIK3R4|VPS28|TEX264|RAB23|ZFYVE1|RAB24|TOMM7|RRAGC|KAT8|ATG16L2|MTDH|ATP5IF1|ATP6V1C2|TOMM6	-0.997651	0	52	1	1	-3.07112	1.65859
1	-3.07112	GO:0061919	M1	1	0	GO Biological Processes	19	process utilizing autophagic mechanism	-3.07112	1.65859	3.4796	24155	503	1245	43	3.45382	0.517526	523|1981|1982|2081|2932|3091|3312|5290|5291|5599|5660|5899|6093|6625|6774|7879|8406|8832|9711|9821|10312|10641|11043|11315|23118|25989|26276|28956|29100|30849|51160|51368|51715|53349|53917|54543|64121|84148|89849|92140|93974|245973|100188893	ATP6V1A|EIF4G1|EIF4G2|ERN1|GSK3B|HIF1A|HSPA8|PIK3CA|PIK3CB|MAPK8|PSAP|RALB|ROCK1|SNRNP70|STAT3|RAB7A|SRPX|CD84|RUBCN|RB1CC1|TCIRG1|NPRL2|MID2|PARK7|TAB2|ULK3|VPS33B|LAMTOR2|TMEM208|PIK3R4|VPS28|TEX264|RAB23|ZFYVE1|RAB24|TOMM7|RRAGC|KAT8|ATG16L2|MTDH|ATP5IF1|ATP6V1C2|TOMM6	-0.997651	0	52	0	0	-3.07112	1.65859
1	-3.05782	GO:0009126	M1	1	0	GO Biological Processes	19	purine nucleoside monophosphate metabolic process	-3.05782	1.81535	3.54013	24155	342	1245	32	2.57028	0.448489	509|516|517|521|522|523|539|1350|1739|3091|3098|3312|4695|4700|4716|4718|4725|4728|4729|4731|4928|6774|8086|10476|10632|11315|26137|27089|29796|57017|93974|441531	ATP5F1C|ATP5MC1|ATP5MC2|ATP5ME|ATP5PF|ATP6V1A|ATP5PO|COX7C|DLG1|HIF1A|HK1|HSPA8|NDUFA2|NDUFA6|NDUFB10|NDUFC2|NDUFS5|NDUFS8|NDUFV2|NDUFV3|NUP98|STAT3|AAAS|ATP5PD|ATP5MG|PARK7|ZBTB20|UQCRQ|UQCR10|COQ9|ATP5IF1|PGAM4	-0.993464	0	9	0	0	-5.12475	3.52756
1	-3.05732	GO:1901889	M1	1	0	GO Biological Processes	19	negative regulation of cell junction assembly	-3.05732	5.06129	4.54253	24155	23	1245	6	0.481928	0.196272	1636|4035|4323|6093|7057|23603	ACE|LRP1|MMP14|ROCK1|THBS1|CORO1C	-0.993464	0	53	1	1	-3.05732	5.06129
1	-3.05732	GO:0060055	M1	1	0	GO Biological Processes	19	angiogenesis involved in wound healing	-3.05732	5.06129	4.54253	24155	23	1245	6	0.481928	0.196272	2113|2683|3690|4162|5054|5291	ETS1|B4GALT1|ITGB3|MCAM|SERPINE1|PIK3CB	-0.993464	0	54	1	1	-3.05732	5.06129
1	-3.03907	GO:0070527	M1	1	0	GO Biological Processes	19	platelet aggregation	-3.03907	3.2336	4.03817	24155	60	1245	10	0.803213	0.252976	87|3690|4627|5156|5291|5294|5912|7094|10019|55330	ACTN1|ITGB3|MYH9|PDGFRA|PIK3CB|PIK3CG|RAP2B|TLN1|SH2B3|BLOC1S4	-0.978374	0	22	0	0	-4.35418	3.2336
1	-3.0029	GO:0090066	M1	1	0	GO Biological Processes	19	regulation of anatomical structure size	-3.0029	1.6455	3.42429	24155	507	1245	43	3.45382	0.517526	382|857|1385|1636|1739|1909|2149|2241|2335|2764|2932|3274|3575|3672|4035|4131|4690|5028|5048|5724|5910|5987|6093|6259|6546|6711|8829|9113|9353|9530|9821|10000|10097|10787|23191|56262|80206|84501|91584|93663|118813|196527|374666	ARF6|CAV1|CREB1|ACE|DLG1|EDNRA|F2R|FER|FN1|GMFB|GSK3B|HRH2|IL7R|ITGA1|LRP1|MAP1B|NCK1|P2RY1|PAFAH1B1|PTAFR|RAP1GDS1|TRIM27|ROCK1|RYK|SLC8A1|SPTBN1|NRP1|LATS1|SLIT2|BAG4|RB1CC1|AKT3|ACTR2|NCKAP1|CYFIP1|LRRC8A|FHOD3|SPIRE2|PLXNA4|ARHGAP18|ZFYVE27|ANO6|WASH3P	-0.94534	0	16	0	0	-4.67817	3.2336
1	-2.99904	GO:0010770	M1	1	0	GO Biological Processes	19	positive regulation of cell morphogenesis involved in differentiation	-2.99904	2.26772	3.67905	24155	154	1245	18	1.44578	0.338302	1398|2335|4035|4131|4976|5048|6498|8829|9353|9839|10097|10154|10519|23191|51199|91584|118813|170506	CRK|FN1|LRP1|MAP1B|OPA1|PAFAH1B1|SKIL|NRP1|SLIT2|ZEB2|ACTR2|PLXNC1|CIB1|CYFIP1|NIN|PLXNA4|ZFYVE27|DHX36	-0.94459	0	40	0	0	-3.40307	3.1584
1	-2.99215	GO:0030099	M1	1	0	GO Biological Processes	19	myeloid cell differentiation	-2.99215	1.71737	3.44892	24155	418	1245	37	2.97189	0.481261	87|182|632|842|1385|1436|2101|2113|2200|3091|3624|3665|3717|4015|4627|5048|5295|5469|5781|5929|6774|7057|7099|7994|8792|9258|10019|10312|10519|25979|28996|54681|54861|84148|93974|129138|135228	ACTN1|JAG1|BGLAP|CASP9|CREB1|CSF1R|ESRRA|ETS1|FBN1|HIF1A|INHBA|IRF7|JAK2|LOX|MYH9|PAFAH1B1|PIK3R1|MED1|PTPN11|RBBP5|STAT3|THBS1|TLR4|KAT6A|TNFRSF11A|MFHAS1|SH2B3|TCIRG1|CIB1|DHRS7B|HIPK2|P4HTM|SNRK|KAT8|ATP5IF1|ANKRD54|CD109	-0.940789	0	55	1	1	-2.99215	3.6378
1	-2.98496	GO:1901653	M1	1	0	GO Biological Processes	19	cellular response to peptide	-2.98496	1.74565	3.45618	24155	389	1245	35	2.81124	0.46846	523|632|781|857|1385|1398|2101|2200|2241|2358|2932|3676|3717|4035|4131|4644|4690|4976|5290|5295|5621|5781|6093|6774|7099|7391|10312|11031|23191|26060|55667|57085|114814|114882|245973	ATP6V1A|BGLAP|CACNA2D1|CAV1|CREB1|CRK|ESRRA|FBN1|FER|FPR2|GSK3B|ITGA4|JAK2|LRP1|MAP1B|MYO5A|NCK1|OPA1|PIK3CA|PIK3R1|PRNP|PTPN11|ROCK1|STAT3|TLR4|USF1|TCIRG1|RAB31|CYFIP1|APPL1|DENND4C|AGTRAP|GNRHR2|OSBPL8|ATP6V1C2	-0.93972	0	7	0	0	-5.40262	1.87757
1	-2.98496	GO:0032970	M1	1	0	GO Biological Processes	19	regulation of actin filament-based process	-2.98496	1.74565	3.45618	24155	389	1245	35	2.81124	0.46846	382|857|1398|1436|1739|1901|2241|2764|4035|4627|4690|5156|5159|5295|5987|6093|6711|7010|8558|8829|9113|9353|9530|10097|10787|23191|50944|57381|57551|80206|84501|93663|122786|374666|388591	ARF6|CAV1|CRK|CSF1R|DLG1|S1PR1|FER|GMFB|LRP1|MYH9|NCK1|PDGFRA|PDGFRB|PIK3R1|TRIM27|ROCK1|SPTBN1|TEK|CDK10|NRP1|LATS1|SLIT2|BAG4|ACTR2|NCKAP1|CYFIP1|SHANK1|RHOJ|TAOK1|FHOD3|SPIRE2|ARHGAP18|FRMD6|WASH3P|RNF207	-0.93972	0	16	0	0	-4.67817	3.2336
1	-2.97925	GO:0051091	M1	1	0	GO Biological Processes	19	positive regulation of DNA-binding transcription factor activity	-2.97925	1.93273	3.53181	24155	261	1245	26	2.08835	0.405261	367|857|1386|2241|3717|4791|4919|4921|5987|6774|7099|8792|9252|10519|11043|11315|22954|23085|23118|28996|51360|55367|56919|60485|92140|114548	AR|CAV1|ATF2|FER|JAK2|NFKB2|ROR1|DDR2|TRIM27|STAT3|TLR4|TNFRSF11A|RPS6KA5|CIB1|MID2|PARK7|TRIM32|ERC1|TAB2|HIPK2|MBTPS2|PIDD1|DHX33|SAV1|MTDH|NLRP3	-0.937038	0	50	0	0	-3.13339	2.32819
1	-2.97613	GO:0007162	M1	1	0	GO Biological Processes	19	negative regulation of cell adhesion	-2.97613	1.87974	3.50736	24155	289	1245	28	2.249	0.420214	102|182|1739|2615|3559|3717|4035|4155|4241|4323|5054|5074|5295|5420|5621|5781|6591|7045|7057|8324|10019|10154|10631|23603|29126|54542|57045|91584	ADAM10|JAG1|DLG1|LRRC32|IL2RA|JAK2|LRP1|MBP|MELTF|MMP14|SERPINE1|PAWR|PIK3R1|PODXL|PRNP|PTPN11|SNAI2|TGFBI|THBS1|FZD7|SH2B3|PLXNC1|POSTN|CORO1C|CD274|RC3H2|TWSG1|PLXNA4	-0.936917	0	53	0	0	-3.05732	5.06129
1	-2.97192	GO:1903827	M1	1	0	GO Biological Processes	19	regulation of cellular protein localization	-2.97192	1.62914	3.39422	24155	524	1245	44	3.53414	0.523292	102|367|382|580|636|1739|2037|2048|2932|4035|4323|5295|5494|5599|5621|5781|5899|6711|7327|7529|9258|9530|10082|10134|10347|10519|11079|11315|25885|26060|27237|50855|51068|51112|51160|51715|54434|54543|55929|79778|80279|93974|118424|151636	ADAM10|AR|ARF6|BARD1|BICD1|DLG1|EPB41L2|EPHB2|GSK3B|LRP1|MMP14|PIK3R1|PPM1A|MAPK8|PRNP|PTPN11|RALB|SPTBN1|UBE2G2|YWHAB|MFHAS1|BAG4|GPC6|BCAP31|ABCA7|CIB1|RER1|PARK7|POLR1A|APPL1|ARHGEF16|PARD6A|NMD3|TRAPPC12|VPS28|RAB23|SSH1|TOMM7|DMAP1|MICALL2|CDK5RAP3|ATP5IF1|UBE2J2|DTX3L	-0.936063	0	26	0	0	-4.08148	3.46457
1	-2.96649	GO:0043087	M1	1	0	GO Biological Processes	19	regulation of GTPase activity	-2.96649	1.66068	3.40464	24155	479	1245	41	3.29317	0.505768	141|394|1398|1901|2149|2932|3993|5048|5910|5922|6242|8829|9353|9462|9754|9827|10154|10484|10641|11149|23158|23527|23603|26037|27237|27352|50807|51735|57139|57186|57584|57589|91584|93663|119016|134957|139818|152273|163486|414059|414189	ADPRH|ARHGAP5|CRK|S1PR1|F2R|GSK3B|LLGL2|PAFAH1B1|RAP1GDS1|RASA2|RTKN|NRP1|SLIT2|RASAL2|STARD8|RGP1|PLXNC1|SEC23A|NPRL2|BVES|TBC1D9|ACAP2|CORO1C|SIPA1L1|ARHGEF16|SGSM3|ASAP1|RAPGEF6|RGL3|RALGAPA2|ARHGAP21|RIC1|PLXNA4|ARHGAP18|AGAP4|STXBP5|DOCK11|FGD5|DENND1B|TBC1D3B|AGAP6	-0.936063	0	31	0	0	-3.90834	1.66068
1	-2.96638	GO:2001236	M1	1	0	GO Biological Processes	19	regulation of extrinsic apoptotic signaling pathway	-2.96638	2.25309	3.64846	24155	155	1245	18	1.44578	0.338302	367|857|2140|3624|3685|5054|5062|6478|6498|6591|7057|8406|8797|8829|8996|9821|10413|11315	AR|CAV1|EYA3|INHBA|ITGAV|SERPINE1|PAK2|SIAH2|SKIL|SNAI2|THBS1|SRPX|TNFRSF10A|NRP1|NOL3|RB1CC1|YAP1|PARK7	-0.936063	0	34	0	0	-3.61525	2.4252
1	-2.95299	GO:0007411	M1	1	0	GO Biological Processes	19	axon guidance	-2.95299	1.89798	3.49769	24155	276	1245	27	2.16867	0.412811	1436|1944|1948|2048|4035|5290|5291|5295|5781|6259|6586|6711|7204|8609|8633|8828|8829|9252|9353|10154|11313|23022|23191|23768|30011|91584|91624	CSF1R|EFNA3|EFNB2|EPHB2|LRP1|PIK3CA|PIK3CB|PIK3R1|PTPN11|RYK|SLIT3|SPTBN1|TRIO|KLF7|UNC5C|NRP2|NRP1|RPS6KA5|SLIT2|PLXNC1|LYPLA2|PALLD|CYFIP1|FLRT2|SH3KBP1|PLXNA4|NEXN	-0.932843	0	2	0	0	-7.50906	1.96166
1	-2.95364	GO:0009123	M1	1	0	GO Biological Processes	19	nucleoside monophosphate metabolic process	-2.95364	1.7544	3.43689	24155	376	1245	34	2.73092	0.46191	509|516|517|521|522|523|539|1350|1739|3091|3098|3312|4695|4700|4716|4718|4725|4728|4729|4731|4928|6774|8086|10476|10591|10632|11315|26137|27089|29796|57017|93974|377841|441531	ATP5F1C|ATP5MC1|ATP5MC2|ATP5ME|ATP5PF|ATP6V1A|ATP5PO|COX7C|DLG1|HIF1A|HK1|HSPA8|NDUFA2|NDUFA6|NDUFB10|NDUFC2|NDUFS5|NDUFS8|NDUFV2|NDUFV3|NUP98|STAT3|AAAS|ATP5PD|DNPH1|ATP5MG|PARK7|ZBTB20|UQCRQ|UQCR10|COQ9|ATP5IF1|ENTPD8|PGAM4	-0.932843	0	9	0	0	-5.12475	3.52756
1	-2.95158	GO:2001032	M1	1	0	GO Biological Processes	19	regulation of double-strand break repair via nonhomologous end joining	-2.95158	4.8504	4.39937	24155	24	1245	6	0.481928	0.196272	10097|51149|55183|84309|151636|158880	ACTR2|MRNIP|RIF1|NUDT16L1|DTX3L|USP51	-0.932843	0	30	0	0	-3.92727	4.8504
1	-2.95158	GO:2000209	M1	1	0	GO Biological Processes	19	regulation of anoikis	-2.95158	4.8504	4.39937	24155	24	1245	6	0.481928	0.196272	166|857|5290|6591|25855|51651	TLE5|CAV1|PIK3CA|SNAI2|BRMS1|PTRH2	-0.932843	0	56	1	1	-2.95158	8.31497
1	-2.94001	GO:0061299	M1	1	0	GO Biological Processes	19	retina vasculature morphogenesis in camera-type eye	-2.94001	7.76064	4.98472	24155	10	1245	4	0.321285	0.160384	1282|8829|57381|91355	COL4A1|NRP1|RHOJ|LRP5L	-0.92976	0	12	0	0	-4.93161	7.9889
1	-2.94001	GO:0051918	M1	1	0	GO Biological Processes	19	negative regulation of fibrinolysis	-2.94001	7.76064	4.98472	24155	10	1245	4	0.321285	0.160384	5054|7056|7057|7391	SERPINE1|THBD|THBS1|USF1	-0.92976	0	35	0	0	-3.57985	7.76064
1	-2.94001	GO:0070099	M1	1	0	GO Biological Processes	19	regulation of chemokine-mediated signaling pathway	-2.94001	7.76064	4.98472	24155	10	1245	4	0.321285	0.160384	3091|6586|9353|10019	HIF1A|SLIT3|SLIT2|SH2B3	-0.92976	0	57	1	1	-2.94001	11.641
1	-2.92973	GO:0097485	M1	1	0	GO Biological Processes	19	neuron projection guidance	-2.92973	1.89113	3.47736	24155	277	1245	27	2.16867	0.412811	1436|1944|1948|2048|4035|5290|5291|5295|5781|6259|6586|6711|7204|8609|8633|8828|8829|9252|9353|10154|11313|23022|23191|23768|30011|91584|91624	CSF1R|EFNA3|EFNB2|EPHB2|LRP1|PIK3CA|PIK3CB|PIK3R1|PTPN11|RYK|SLIT3|SPTBN1|TRIO|KLF7|UNC5C|NRP2|NRP1|RPS6KA5|SLIT2|PLXNC1|LYPLA2|PALLD|CYFIP1|FLRT2|SH3KBP1|PLXNA4|NEXN	-0.929061	0	2	0	0	-7.50906	1.96166
1	-2.92281	GO:0001952	M1	1	0	GO Biological Processes	19	regulation of cell-matrix adhesion	-2.92281	2.44558	3.68512	24155	119	1245	15	1.20482	0.309203	182|2932|4035|4323|4921|5054|5291|5295|6093|7010|7057|8829|10519|10631|23603	JAG1|GSK3B|LRP1|MMP14|DDR2|SERPINE1|PIK3CB|PIK3R1|ROCK1|TEK|THBS1|NRP1|CIB1|POSTN|CORO1C	-0.929061	0	3	0	0	-7.12019	2.74713
1	-2.92915	GO:0030041	M1	1	0	GO Biological Processes	19	actin filament polymerization	-2.92915	2.13204	3.57359	24155	182	1245	20	1.60643	0.356311	382|1739|2241|2764|3717|4690|5987|6711|9113|9353|9530|10097|10787|22921|23191|79778|80206|84501|93663|374666	ARF6|DLG1|FER|GMFB|JAK2|NCK1|TRIM27|SPTBN1|LATS1|SLIT2|BAG4|ACTR2|NCKAP1|MSRB2|CYFIP1|MICALL2|FHOD3|SPIRE2|ARHGAP18|WASH3P	-0.929061	0	16	0	0	-4.67817	3.2336
1	-2.93491	GO:1903076	M1	1	0	GO Biological Processes	19	regulation of protein localization to plasma membrane	-2.93491	2.65496	3.76762	24155	95	1245	13	1.04418	0.288087	367|382|1739|2048|4035|4323|5295|5621|6711|10519|11079|26060|27237	AR|ARF6|DLG1|EPHB2|LRP1|MMP14|PIK3R1|PRNP|SPTBN1|CIB1|RER1|APPL1|ARHGEF16	-0.929061	0	26	0	0	-4.08148	3.46457
1	-2.92729	GO:1901137	M1	1	0	GO Biological Processes	19	carbohydrate derivative biosynthetic process	-2.92729	1.50012	3.30113	24155	776	1245	60	4.81928	0.606989	509|516|517|521|522|539|746|1464|2132|2530|2683|2977|3091|3098|3340|3373|4121|4124|4249|4832|4928|5074|5159|6480|6774|7264|7327|7357|8086|8818|9334|9469|9524|9953|10082|10327|10347|10476|10632|22856|23753|26137|29940|51227|51363|54344|55454|60490|79646|79690|79717|84002|84197|117248|160418|170384|200185|256435|441531|727936	ATP5F1C|ATP5MC1|ATP5MC2|ATP5ME|ATP5PF|ATP5PO|TMEM258|CSPG4|EXT2|FUT8|B4GALT1|GUCY1A2|HIF1A|HK1|NDST1|HYAL1|MAN1A1|MAN2A1|MGAT5|NME3|NUP98|PAWR|PDGFRB|ST6GAL1|STAT3|TSTA3|UBE2G2|UGCG|AAAS|DPM2|B4GALT5|CHST3|TECR|HS3ST3B1|GPC6|AKR1A1|ABCA7|ATP5PD|ATP5MG|CHSY1|SDF2L1|ZBTB20|DSE|PIGP|CHST15|DPM3|CSGALNACT2|PPCDC|PANK3|GAL3ST4|PPCS|B3GNT5|POMK|GALNT15|TMTC3|FUT11|KRTCAP2|ST6GALNAC3|PGAM4|GXYLT2	-0.929061	0	33	0	0	-3.78704	4.47729
1	-2.9231	GO:0007041	M1	1	0	GO Biological Processes	19	lysosomal transport	-2.9231	2.53853	3.71813	24155	107	1245	14	1.1245	0.29884	3312|3482|4035|5660|7879|8031|9392|26276|30845|55681|55850|79158|151636|374666	HSPA8|IGF2R|LRP1|PSAP|RAB7A|NCOA4|TGFBRAP1|VPS33B|EHD3|SCYL2|USE1|GNPTAB|DTX3L|WASH3P	-0.929061	0	58	1	1	-2.9231	4.61943
1	-2.90288	GO:0045862	M1	1	0	GO Biological Processes	19	positive regulation of proteolysis	-2.90288	1.75894	3.40108	24155	364	1245	33	2.6506	0.455255	842|857|1944|2149|2335|2932|3717|4155|4241|4323|4627|6774|8754|8797|9131|10016|10134|22954|54467|54982|54998|55367|79016|80279|80759|84168|84236|93974|114548|147372|160418|400410|414899	CASP9|CAV1|EFNA3|F2R|FN1|GSK3B|JAK2|MBP|MELTF|MMP14|MYH9|STAT3|ADAM9|TNFRSF10A|AIFM1|PDCD6|BCAP31|TRIM32|ANKIB1|CLN6|AURKAIP1|PIDD1|DDA1|CDK5RAP3|KHDC1|ANTXR1|RHBDD1|ATP5IF1|NLRP3|CCBE1|TMTC3|ST20|BLID	-0.918155	0	18	0	0	-4.6043	1.8048
1	-2.89862	GO:1904207	M1	1	0	GO Biological Processes	19	regulation of chemokine (C-C motif) ligand 2 secretion	-2.89862	11.641	5.5472	24155	5	1245	3	0.240964	0.138953	4035|4155|10631	LRP1|MBP|POSTN	-0.918155	0	47	0	0	-3.27953	14.5512
1	-2.89862	GO:0051414	M1	1	0	GO Biological Processes	19	response to cortisol	-2.89862	11.641	5.5472	24155	5	1245	3	0.240964	0.138953	687|6586|9353	KLF9|SLIT3|SLIT2	-0.918155	0	57	0	0	-2.94001	11.641
1	-2.89862	GO:0070535	M1	1	0	GO Biological Processes	19	histone H2A K63-linked ubiquitination	-2.89862	11.641	5.5472	24155	5	1245	3	0.240964	0.138953	9320|55611|165918	TRIP12|OTUB1|RNF168	-0.918155	0	59	1	1	-2.89862	11.641
1	-2.89862	GO:0021825	M1	1	0	GO Biological Processes	19	substrate-dependent cerebral cortex tangential migration	-2.89862	11.641	5.5472	24155	5	1245	3	0.240964	0.138953	8828|8829|9353	NRP2|NRP1|SLIT2	-0.918155	0	60	1	1	-2.89862	11.641
1	-2.8865	GO:0061564	M1	1	0	GO Biological Processes	19	axon development	-2.8865	1.62309	3.32864	24155	514	1245	43	3.45382	0.517526	1009|1385|1436|1944|1948|2048|2335|2932|3676|3717|4035|4131|5048|5290|5291|5295|5781|6259|6498|6586|6711|7204|8609|8633|8828|8829|9252|9334|9353|9839|10154|11313|22954|23022|23191|23768|26037|30011|51199|91584|91624|113246|118813	CDH11|CREB1|CSF1R|EFNA3|EFNB2|EPHB2|FN1|GSK3B|ITGA4|JAK2|LRP1|MAP1B|PAFAH1B1|PIK3CA|PIK3CB|PIK3R1|PTPN11|RYK|SKIL|SLIT3|SPTBN1|TRIO|KLF7|UNC5C|NRP2|NRP1|RPS6KA5|B4GALT5|SLIT2|ZEB2|PLXNC1|LYPLA2|TRIM32|PALLD|CYFIP1|FLRT2|SIPA1L1|SH3KBP1|NIN|PLXNA4|NEXN|C12orf57|ZFYVE27	-0.910657	0	2	0	0	-7.50906	1.96166
1	-2.88593	GO:0090287	M1	1	0	GO Biological Processes	19	regulation of cellular response to growth factor stimulus	-2.88593	1.85408	3.42882	24155	293	1245	28	2.249	0.420214	857|2200|2246|2321|3091|3690|4015|5494|6498|6868|6935|7057|8516|9353|10016|11167|23191|25960|27122|28996|57045|57608|64750|79176|79812|81792|135228|147372	CAV1|FBN1|FGF1|FLT1|HIF1A|ITGB3|LOX|PPM1A|SKIL|ADAM17|ZEB1|THBS1|ITGA8|SLIT2|PDCD6|FSTL1|CYFIP1|ADGRA2|DKK3|HIPK2|TWSG1|JCAD|SMURF2|FBXL15|MMRN2|ADAMTS12|CD109|CCBE1	-0.910657	0	6	0	0	-5.85006	2.40119
1	-2.87539	GO:0032990	M1	1	0	GO Biological Processes	19	cell part morphogenesis	-2.87539	1.52947	3.27715	24155	685	1245	54	4.33735	0.577296	102|960|1009|1385|1436|1944|1948|2048|2335|2932|3110|3672|3676|4035|4131|4976|5048|5168|5290|5291|5295|5781|6093|6259|6498|6586|6711|7204|8609|8633|8828|8829|9252|9334|9353|9839|10097|10154|10631|10787|11313|23022|23191|23603|23768|26037|30011|50944|51199|91584|91624|113246|118813|170506	ADAM10|CD44|CDH11|CREB1|CSF1R|EFNA3|EFNB2|EPHB2|FN1|GSK3B|MNX1|ITGA1|ITGA4|LRP1|MAP1B|OPA1|PAFAH1B1|ENPP2|PIK3CA|PIK3CB|PIK3R1|PTPN11|ROCK1|RYK|SKIL|SLIT3|SPTBN1|TRIO|KLF7|UNC5C|NRP2|NRP1|RPS6KA5|B4GALT5|SLIT2|ZEB2|ACTR2|PLXNC1|POSTN|NCKAP1|LYPLA2|PALLD|CYFIP1|CORO1C|FLRT2|SIPA1L1|SH3KBP1|SHANK1|NIN|PLXNA4|NEXN|C12orf57|ZFYVE27|DHX36	-0.907567	0	2	0	0	-7.50906	1.96166
1	-2.87515	GO:0006163	M1	1	0	GO Biological Processes	19	purine nucleotide metabolic process	-2.87515	1.58312	3.30195	24155	576	1245	47	3.7751	0.540161	509|516|517|521|522|523|539|1350|1739|2977|2980|3091|3098|3312|4695|4700|4716|4718|4725|4728|4729|4731|4832|4928|4976|6774|6818|8086|8694|9524|10476|10591|10632|11315|25939|26137|27089|29796|51715|57017|60490|79646|79717|93974|131870|374659|441531	ATP5F1C|ATP5MC1|ATP5MC2|ATP5ME|ATP5PF|ATP6V1A|ATP5PO|COX7C|DLG1|GUCY1A2|GUCA2A|HIF1A|HK1|HSPA8|NDUFA2|NDUFA6|NDUFB10|NDUFC2|NDUFS5|NDUFS8|NDUFV2|NDUFV3|NME3|NUP98|OPA1|STAT3|SULT1A3|AAAS|DGAT1|TECR|ATP5PD|DNPH1|ATP5MG|PARK7|SAMHD1|ZBTB20|UQCRQ|UQCR10|RAB23|COQ9|PPCDC|PANK3|PPCS|ATP5IF1|NUDT16|HDDC3|PGAM4	-0.907567	0	9	0	0	-5.12475	3.52756
1	-2.87721	GO:0035729	M1	1	0	GO Biological Processes	19	cellular response to hepatocyte growth factor stimulus	-2.87721	5.70635	4.52507	24155	17	1245	5	0.401606	0.179243	1385|5469|8829|26060|81792	CREB1|MED1|NRP1|APPL1|ADAMTS12	-0.907567	0	36	0	0	-3.55094	6.4672
1	-2.8722	GO:0009101	M1	1	0	GO Biological Processes	19	glycoprotein biosynthetic process	-2.8722	1.76881	3.38231	24155	351	1245	32	2.57028	0.448489	746|1464|2132|2530|2683|3340|4121|4124|4249|5074|6480|7327|8818|9334|9469|9953|10347|22856|23753|29940|51363|54344|55454|79690|84002|84197|117248|160418|170384|200185|256435|727936	TMEM258|CSPG4|EXT2|FUT8|B4GALT1|NDST1|MAN1A1|MAN2A1|MGAT5|PAWR|ST6GAL1|UBE2G2|DPM2|B4GALT5|CHST3|HS3ST3B1|ABCA7|CHSY1|SDF2L1|DSE|CHST15|DPM3|CSGALNACT2|GAL3ST4|B3GNT5|POMK|GALNT15|TMTC3|FUT11|KRTCAP2|ST6GALNAC3|GXYLT2	-0.907152	0	33	0	0	-3.78704	4.47729
1	-2.85035	GO:0042775	M1	1	0	GO Biological Processes	19	mitochondrial ATP synthesis coupled electron transport	-2.85035	2.60022	3.6813	24155	97	1245	13	1.04418	0.288087	1350|4695|4700|4716|4718|4725|4728|4729|4731|11315|27089|29796|57017	COX7C|NDUFA2|NDUFA6|NDUFB10|NDUFC2|NDUFS5|NDUFS8|NDUFV2|NDUFV3|PARK7|UQCRQ|UQCR10|COQ9	-0.905047	0	9	0	0	-5.12475	3.52756
1	-2.85219	GO:1902903	M1	1	0	GO Biological Processes	19	regulation of supramolecular fiber organization	-2.85219	1.76378	3.36505	24155	352	1245	32	2.57028	0.448489	382|1739|1901|2241|2764|3312|3949|4131|4690|5295|5987|6093|6711|8829|9113|9353|9530|10097|10519|10787|11315|23116|23191|50944|51199|57551|80206|84501|89795|93663|157922|374666	ARF6|DLG1|S1PR1|FER|GMFB|HSPA8|LDLR|MAP1B|NCK1|PIK3R1|TRIM27|ROCK1|SPTBN1|NRP1|LATS1|SLIT2|BAG4|ACTR2|CIB1|NCKAP1|PARK7|TOGARAM1|CYFIP1|SHANK1|NIN|TAOK1|FHOD3|SPIRE2|NAV3|ARHGAP18|CAMSAP1|WASH3P	-0.905047	0	16	0	0	-4.67817	3.2336
1	-2.86735	GO:0072657	M1	1	0	GO Biological Processes	19	protein localization to membrane	-2.86735	1.55711	3.28415	24155	623	1245	50	4.01606	0.556436	102|367|382|673|857|1739|2048|3676|4035|4323|4644|5028|5295|5599|5621|6093|6135|6141|6143|6176|6181|6711|7529|9409|9530|9697|10082|10098|10484|10519|10640|10979|11031|11079|25837|26060|26088|27237|30845|51608|51735|54434|55667|55670|118813|130617|200894|253832|254359|285521	ADAM10|AR|ARF6|BRAF|CAV1|DLG1|EPHB2|ITGA4|LRP1|MMP14|MYO5A|P2RY1|PIK3R1|MAPK8|PRNP|ROCK1|RPL11|RPL18|RPL19|RPLP1|RPLP2|SPTBN1|YWHAB|PEX16|BAG4|TRAM2|GPC6|TSPAN5|SEC23A|CIB1|EXOC5|FERMT2|RAB31|RER1|RAB26|APPL1|GGA1|ARHGEF16|EHD3|GET4|RAPGEF6|SSH1|DENND4C|PEX26|ZFYVE27|ZFAND2B|ARL13B|ZDHHC20|ZDHHC24|COX18	-0.905047	0	26	0	0	-4.08148	3.46457
1	-2.85035	GO:2001022	M1	1	0	GO Biological Processes	19	positive regulation of response to DNA damage stimulus	-2.85035	2.60022	3.6813	24155	97	1245	13	1.04418	0.288087	545|2140|5883|6498|10097|23201|51149|54780|55183|84501|131870|151636|165918	ATR|EYA3|RAD9A|SKIL|ACTR2|FAM168A|MRNIP|NSMCE4A|RIF1|SPIRE2|NUDT16|DTX3L|RNF168	-0.905047	0	30	0	0	-3.92727	4.8504
1	-2.855	GO:0051603	M1	1	0	GO Biological Processes	19	proteolysis involved in cellular protein catabolic process	-2.855	1.51322	3.25446	24155	718	1245	56	4.49799	0.587396	550|857|2932|5708|6135|6400|6478|7327|7328|9113|9320|9690|10134|11101|11315|11342|22954|23753|25852|25906|26233|27246|28996|51035|51160|51608|54467|55139|55336|56254|57563|64682|64750|79016|79176|79718|80011|80279|81792|83737|83892|84236|84640|84993|90864|91544|93611|93974|118424|130617|151636|158880|160418|165918|219333|253980	AUP1|CAV1|GSK3B|PSMD2|RPL11|SEL1L|SIAH2|UBE2G2|UBE2H|LATS1|TRIP12|UBE3C|BCAP31|ATE1|PARK7|RNF13|TRIM32|SDF2L1|ARMC8|ANAPC15|FBXL6|RNF115|HIPK2|UBXN1|VPS28|GET4|ANKIB1|ANKZF1|FBXL8|RNF20|KLHL8|ANAPC1|SMURF2|DDA1|FBXL15|TBL1XR1|FAM192A|CDK5RAP3|ADAMTS12|ITCH|KCTD10|RHBDD1|USP38|UBL7|SPSB3|UBXN11|FBXO44|ATP5IF1|UBE2J2|ZFAND2B|DTX3L|USP51|TMTC3|RNF168|USP12|KCTD13	-0.905047	0	39	0	0	-3.40714	1.7524
1	-2.85144	GO:0030866	M1	1	0	GO Biological Processes	19	cortical actin cytoskeleton organization	-2.85144	3.6096	3.99262	24155	43	1245	8	0.64257	0.226452	382|1739|2037|3993|6093|6242|7094|10787	ARF6|DLG1|EPB41L2|LLGL2|ROCK1|RTKN|TLN1|NCKAP1	-0.905047	0	48	0	0	-3.16903	3.6378
1	-2.85144	GO:0001953	M1	1	0	GO Biological Processes	19	negative regulation of cell-matrix adhesion	-2.85144	3.6096	3.99262	24155	43	1245	8	0.64257	0.226452	182|4035|4323|5054|5295|7057|10631|23603	JAG1|LRP1|MMP14|SERPINE1|PIK3R1|THBS1|POSTN|CORO1C	-0.905047	0	53	0	0	-3.05732	5.06129
1	-2.86127	GO:0031670	M1	1	0	GO Biological Processes	19	cellular response to nutrient	-2.86127	2.88402	3.78383	24155	74	1245	11	0.883534	0.265216	632|4976|5028|5469|6591|7391|7442|10631|54434|57407|729438	BGLAP|OPA1|P2RY1|MED1|SNAI2|USF1|TRPV1|POSTN|SSH1|NMRAL1|CASTOR2	-0.905047	0	61	1	1	-2.86127	2.88402
1	-2.83231	GO:0007178	M1	1	0	GO Biological Processes	19	transmembrane receptor protein serine/threonine kinase signaling pathway	-2.83231	1.75879	3.34785	24155	353	1245	32	2.57028	0.448489	857|1281|1385|2200|2530|2615|3624|3693|4012|4015|5494|5796|6498|6711|6868|6935|7057|8516|8754|9197|9392|10979|11167|26060|27122|28996|50855|57045|64750|79176|135228|151742	CAV1|COL3A1|CREB1|FBN1|FUT8|LRRC32|INHBA|ITGB5|LNPEP|LOX|PPM1A|PTPRK|SKIL|SPTBN1|ADAM17|ZEB1|THBS1|ITGA8|ADAM9|SLC33A1|TGFBRAP1|FERMT2|FSTL1|APPL1|DKK3|HIPK2|PARD6A|TWSG1|SMURF2|FBXL15|CD109|PPM1L	-0.896547	0	6	0	0	-5.85006	2.40119
1	-2.83315	GO:1903829	M1	1	0	GO Biological Processes	19	positive regulation of cellular protein localization	-2.83315	1.79645	3.36453	24155	324	1245	30	2.40964	0.434605	382|636|1739|2037|2048|2932|4035|5295|5494|5599|5621|6711|7529|10134|10347|10519|11079|11315|27237|50855|51068|51112|51160|54434|54543|55929|79778|80279|118424|151636	ARF6|BICD1|DLG1|EPB41L2|EPHB2|GSK3B|LRP1|PIK3R1|PPM1A|MAPK8|PRNP|SPTBN1|YWHAB|BCAP31|ABCA7|CIB1|RER1|PARK7|ARHGEF16|PARD6A|NMD3|TRAPPC12|VPS28|SSH1|TOMM7|DMAP1|MICALL2|CDK5RAP3|UBE2J2|DTX3L	-0.896547	0	26	0	0	-4.08148	3.46457
1	-2.83388	GO:0022613	M1	1	0	GO Biological Processes	19	ribonucleoprotein complex biogenesis	-2.83388	1.62324	3.28952	24155	502	1245	42	3.37349	0.511686	545|636|6135|6733|7458|8568|8996|9188|10146|22803|22889|23064|27079|27335|51013|51042|51068|51077|51093|51367|51747|54059|54496|54606|54663|54960|55052|55272|55692|55695|57461|63899|79922|83939|92345|131870|153443|155400|220064|260294|404672|100130932	ATR|BICD1|RPL11|SRPK2|EIF4H|RRP1|NOL3|DDX21|G3BP1|XRN2|KHDC4|SETX|RPUSD2|EIF3K|EXOSC1|ZNF593|NMD3|FCF1|RRNAD1|POP5|LUC7L3|YBEY|PRMT7|DDX56|WDR74|GEMIN8|MRPL20|IMP3|LUC7L|NSUN5|ISY1|NSUN3|MRM1|EIF2A|NAF1|NUDT16|SRFBP1|NSUN5P1|LTO1|NSUN5P2|GTF2H5|SNRPGP15	-0.896547	0	41	0	0	-3.39313	4.31147
1	-2.83841	GO:0021537	M1	1	0	GO Biological Processes	19	telencephalon development	-2.83841	1.91715	3.41863	24155	253	1245	25	2.00803	0.397554	1281|1398|1436|2048|2932|3084|3091|3624|4035|5048|6259|6546|6586|6867|8828|8829|9353|9839|22803|27089|51199|79969|91584|113246|200894	COL3A1|CRK|CSF1R|EPHB2|GSK3B|NRG1|HIF1A|INHBA|LRP1|PAFAH1B1|RYK|SLC8A1|SLIT3|TACC1|NRP2|NRP1|SLIT2|ZEB2|XRN2|UQCRQ|NIN|ATAT1|PLXNA4|C12orf57|ARL13B	-0.896547	0	62	1	1	-2.83841	1.91715
1	-2.82659	GO:0032273	M1	1	0	GO Biological Processes	19	positive regulation of protein polymerization	-2.82659	2.31661	3.56271	24155	134	1245	16	1.28514	0.319214	382|1739|2241|2764|4131|4690|5987|9530|10097|10787|23116|23191|51199|84501|89795|374666	ARF6|DLG1|FER|GMFB|MAP1B|NCK1|TRIM27|BAG4|ACTR2|NCKAP1|TOGARAM1|CYFIP1|NIN|SPIRE2|NAV3|WASH3P	-0.893181	0	16	0	0	-4.67817	3.2336
1	-2.81683	GO:0010257	M1	1	0	GO Biological Processes	19	NADH dehydrogenase complex assembly	-2.81683	3.0315	3.79355	24155	64	1245	10	0.803213	0.252976	617|4695|4700|4716|4718|4725|4728|4729|4731|55572	BCS1L|NDUFA2|NDUFA6|NDUFB10|NDUFC2|NDUFS5|NDUFS8|NDUFV2|NDUFV3|FOXRED1	-0.88845	0	9	0	0	-5.12475	3.52756
1	-2.81683	GO:0032981	M1	1	0	GO Biological Processes	19	mitochondrial respiratory chain complex I assembly	-2.81683	3.0315	3.79355	24155	64	1245	10	0.803213	0.252976	617|4695|4700|4716|4718|4725|4728|4729|4731|55572	BCS1L|NDUFA2|NDUFA6|NDUFB10|NDUFC2|NDUFS5|NDUFS8|NDUFV2|NDUFV3|FOXRED1	-0.88845	0	9	0	0	-5.12475	3.52756
1	-2.81257	GO:0006282	M1	1	0	GO Biological Processes	19	regulation of DNA repair	-2.81257	2.38544	3.57628	24155	122	1245	15	1.20482	0.309203	2140|9320|9400|10097|23201|51149|55183|55611|84309|84501|131870|151636|151987|158880|165918	EYA3|TRIP12|RECQL5|ACTR2|FAM168A|MRNIP|RIF1|OTUB1|NUDT16L1|SPIRE2|NUDT16|DTX3L|PPP4R2|USP51|RNF168	-0.88845	0	30	0	0	-3.92727	4.8504
1	-2.81271	GO:0006353	M1	1	0	GO Biological Processes	19	DNA-templated transcription, termination	-2.81271	2.84557	3.73164	24155	75	1245	11	0.883534	0.265216	2967|22803|23064|25885|29101|30834|54797|80298|84967|284119|404672	GTF2H3|XRN2|SETX|POLR1A|SSU72|ZNRD1|MED18|MTERF2|LSM10|CAVIN1|GTF2H5	-0.88845	0	63	1	1	-2.81271	2.84557
1	-2.80909	GO:0042773	M1	1	0	GO Biological Processes	19	ATP synthesis coupled electron transport	-2.80909	2.57368	3.63895	24155	98	1245	13	1.04418	0.288087	1350|4695|4700|4716|4718|4725|4728|4729|4731|11315|27089|29796|57017	COX7C|NDUFA2|NDUFA6|NDUFB10|NDUFC2|NDUFS5|NDUFS8|NDUFV2|NDUFV3|PARK7|UQCRQ|UQCR10|COQ9	-0.887271	0	9	0	0	-5.12475	3.52756
1	-2.80593	GO:0006024	M1	1	0	GO Biological Processes	19	glycosaminoglycan biosynthetic process	-2.80593	2.4693	3.60047	24155	110	1245	14	1.1245	0.29884	1464|2132|2683|3340|3373|5159|9334|9469|9953|10082|22856|29940|51363|55454	CSPG4|EXT2|B4GALT1|NDST1|HYAL1|PDGFRB|B4GALT5|CHST3|HS3ST3B1|GPC6|CHSY1|DSE|CHST15|CSGALNACT2	-0.886386	0	33	0	0	-3.78704	4.47729
1	-2.80128	GO:0050878	M1	1	0	GO Biological Processes	19	regulation of body fluid levels	-2.80128	1.6168	3.26213	24155	504	1245	42	3.37349	0.511686	87|857|1281|1385|2048|2149|2162|2767|3091|3690|3717|4627|4883|5028|5054|5156|5290|5291|5294|5295|5469|5781|5912|7056|7057|7094|7099|7357|7391|7975|10019|10672|23414|25970|30845|55330|57493|80856|126695|139818|160851|196527	ACTN1|CAV1|COL3A1|CREB1|EPHB2|F2R|F13A1|GNA11|HIF1A|ITGB3|JAK2|MYH9|NPR3|P2RY1|SERPINE1|PDGFRA|PIK3CA|PIK3CB|PIK3CG|PIK3R1|MED1|PTPN11|RAP2B|THBD|THBS1|TLN1|TLR4|UGCG|USF1|MAFK|SH2B3|GNA13|ZFPM2|SH2B1|EHD3|BLOC1S4|HEG1|LNPK|KDF1|DOCK11|DGKH|ANO6	-0.884	0	22	0	0	-4.35418	3.2336
1	-2.79767	GO:0002283	M1	1	0	GO Biological Processes	19	neutrophil activation involved in immune response	-2.79767	1.62672	3.26386	24155	489	1245	41	3.29317	0.505768	102|960|1773|2212|2357|2358|2683|3312|3482|3685|4718|5478|5660|5708|5724|5878|5912|6093|7077|7879|8635|8694|10097|10312|10450|11031|11322|22918|23191|23200|23317|25852|28956|51552|53916|53917|79169|83858|158747|196527|374395	ADAM10|CD44|DNASE1|FCGR2A|FPR1|FPR2|B4GALT1|HSPA8|IGF2R|ITGAV|NDUFC2|PPIA|PSAP|PSMD2|PTAFR|RAB5C|RAP2B|ROCK1|TIMP2|RAB7A|RNASET2|DGAT1|ACTR2|TCIRG1|PPIE|RAB31|TMC6|CD93|CYFIP1|ATP11B|DNAJC13|ARMC8|LAMTOR2|RAB14|RAB4B|RAB24|C1orf35|ATAD3B|MOSPD2|ANO6|TMEM179B	-0.88265	0	38	0	0	-3.48878	1.68101
1	-2.79289	GO:0009161	M1	1	0	GO Biological Processes	19	ribonucleoside monophosphate metabolic process	-2.79289	1.74888	3.31362	24155	355	1245	32	2.57028	0.448489	509|516|517|521|522|523|539|1350|1739|3091|3098|3312|4695|4700|4716|4718|4725|4728|4729|4731|4928|6774|8086|10476|10632|11315|26137|27089|29796|57017|93974|441531	ATP5F1C|ATP5MC1|ATP5MC2|ATP5ME|ATP5PF|ATP6V1A|ATP5PO|COX7C|DLG1|HIF1A|HK1|HSPA8|NDUFA2|NDUFA6|NDUFB10|NDUFC2|NDUFS5|NDUFS8|NDUFV2|NDUFV3|NUP98|STAT3|AAAS|ATP5PD|ATP5MG|PARK7|ZBTB20|UQCRQ|UQCR10|COQ9|ATP5IF1|PGAM4	-0.882053	0	9	0	0	-5.12475	3.52756
1	-2.7926	GO:0032543	M1	1	0	GO Biological Processes	19	mitochondrial translation	-2.7926	2.29945	3.52945	24155	135	1245	16	1.28514	0.319214	6150|28958|51069|54998|55052|63899|64951|64960|64976|64983|65993|85476|92170|118487|128308|219402	MRPL23|COA3|MRPL2|AURKAIP1|MRPL20|NSUN3|MRPS24|MRPS15|MRPL40|MRPL32|MRPS34|GFM1|MTG1|CHCHD1|MRPL55|MTIF3	-0.882053	0	24	0	0	-4.09469	2.61595
1	-2.78407	GO:0043616	M1	1	0	GO Biological Processes	19	keratinocyte proliferation	-2.78407	3.52756	3.9119	24155	44	1245	8	0.64257	0.226452	687|1948|5469|5796|6591|10413|126695|135228	KLF9|EFNB2|MED1|PTPRK|SNAI2|YAP1|KDF1|CD109	-0.881235	0	5	0	0	-5.90668	10.447
1	-2.78296	GO:0006364	M1	1	0	GO Biological Processes	19	rRNA processing	-2.78296	1.99456	3.40669	24155	214	1245	22	1.76707	0.373397	6135|8568|9188|22803|27079|51013|51077|51093|51367|54059|54606|54663|55272|55695|63899|79922|92345|131870|153443|155400|260294|404672	RPL11|RRP1|DDX21|XRN2|RPUSD2|EXOSC1|FCF1|RRNAD1|POP5|YBEY|DDX56|WDR74|IMP3|NSUN5|NSUN3|MRM1|NAF1|NUDT16|SRFBP1|NSUN5P1|NSUN5P2|GTF2H5	-0.881235	0	41	0	0	-3.39313	4.31147
1	-2.78407	GO:0038084	M1	1	0	GO Biological Processes	19	vascular endothelial growth factor signaling pathway	-2.78407	3.52756	3.9119	24155	44	1245	8	0.64257	0.226452	2321|5156|5159|8828|8829|25960|57608|147372	FLT1|PDGFRA|PDGFRB|NRP2|NRP1|ADGRA2|JCAD|CCBE1	-0.881235	0	64	1	1	-2.78407	8.31497
1	-2.78407	GO:0090382	M1	1	0	GO Biological Processes	19	phagosome maturation	-2.78407	3.52756	3.9119	24155	44	1245	8	0.64257	0.226452	523|7879|8406|10312|11031|51552|84286|245973	ATP6V1A|RAB7A|SRPX|TCIRG1|RAB31|RAB14|TMEM175|ATP6V1C2	-0.881235	0	65	1	1	-2.78407	5.96973
1	-2.76174	GO:0032060	M1	1	0	GO Biological Processes	19	bleb assembly	-2.76174	7.05513	4.68254	24155	11	1245	4	0.321285	0.160384	2012|4638|6093|196527	EMP1|MYLK|ROCK1|ANO6	-0.862193	0	66	1	1	-2.76174	7.05513
1	-2.75677	GO:0030206	M1	1	0	GO Biological Processes	19	chondroitin sulfate biosynthetic process	-2.75677	4.47729	4.13547	24155	26	1245	6	0.481928	0.196272	1464|9469|22856|29940|51363|55454	CSPG4|CHST3|CHSY1|DSE|CHST15|CSGALNACT2	-0.859392	0	33	0	0	-3.78704	4.47729
1	-2.74185	GO:0006913	M1	1	0	GO Biological Processes	19	nucleocytoplasmic transport	-2.74185	1.7535	3.27641	24155	343	1245	31	2.48996	0.441607	580|2932|3836|3840|4659|4928|5295|5469|5494|5781|6429|6774|7307|8086|11315|26060|26097|51042|51068|51194|51319|51715|51808|54439|54960|55374|55929|79228|84248|129138|503542	BARD1|GSK3B|KPNA1|KPNA4|PPP1R12A|NUP98|PIK3R1|MED1|PPM1A|PTPN11|SRSF4|STAT3|U2AF1|AAAS|PARK7|APPL1|CHTOP|ZNF593|NMD3|IPO11|RSRC1|RAB23|PHAX|RBM27|GEMIN8|TMCO6|DMAP1|THOC6|FYTTD1|ANKRD54|SPRN	-0.84662	0	67	1	1	-2.74185	1.77725
1	-2.73324	GO:0048812	M1	1	0	GO Biological Processes	19	neuron projection morphogenesis	-2.73324	1.52698	3.16992	24155	648	1245	51	4.09639	0.561737	102|1009|1385|1436|1944|1948|2048|2335|2932|3110|3672|3676|4035|4131|4976|5048|5290|5291|5295|5781|6093|6259|6498|6586|6711|7204|8609|8633|8828|8829|9252|9334|9353|9839|10097|10154|10631|10787|11313|23022|23191|23768|26037|30011|50944|51199|91584|91624|113246|118813|170506	ADAM10|CDH11|CREB1|CSF1R|EFNA3|EFNB2|EPHB2|FN1|GSK3B|MNX1|ITGA1|ITGA4|LRP1|MAP1B|OPA1|PAFAH1B1|PIK3CA|PIK3CB|PIK3R1|PTPN11|ROCK1|RYK|SKIL|SLIT3|SPTBN1|TRIO|KLF7|UNC5C|NRP2|NRP1|RPS6KA5|B4GALT5|SLIT2|ZEB2|ACTR2|PLXNC1|POSTN|NCKAP1|LYPLA2|PALLD|CYFIP1|FLRT2|SIPA1L1|SH3KBP1|SHANK1|NIN|PLXNA4|NEXN|C12orf57|ZFYVE27|DHX36	-0.84016	0	2	0	0	-7.50906	1.96166
1	-2.72546	GO:0050678	M1	1	0	GO Biological Processes	19	regulation of epithelial cell proliferation	-2.72546	1.70014	3.24101	24155	388	1245	34	2.73092	0.46191	367|687|857|1386|1739|1948|2246|2321|2683|3091|3373|3676|3690|4485|5469|5796|6591|6678|6774|6868|7010|7057|8324|8828|8829|10000|10016|10413|57608|60485|64743|93974|126695|135228	AR|KLF9|CAV1|ATF2|DLG1|EFNB2|FGF1|FLT1|B4GALT1|HIF1A|HYAL1|ITGA4|ITGB3|MST1|MED1|PTPRK|SNAI2|SPARC|STAT3|ADAM17|TEK|THBS1|FZD7|NRP2|NRP1|AKT3|PDCD6|YAP1|JCAD|SAV1|WDR13|ATP5IF1|KDF1|CD109	-0.839297	0	1	0	0	-8.54717	2.5568
1	-2.71765	GO:1902600	M1	1	0	GO Biological Processes	19	proton transmembrane transport	-2.71765	2.14251	3.41183	24155	163	1245	18	1.44578	0.338302	509|516|517|521|522|523|539|1350|9197|10312|10476|10632|11315|27032|84679|113655|206358|245973	ATP5F1C|ATP5MC1|ATP5MC2|ATP5ME|ATP5PF|ATP6V1A|ATP5PO|COX7C|SLC33A1|TCIRG1|ATP5PD|ATP5MG|PARK7|ATP2C1|SLC9A7|MFSD3|SLC36A1|ATP6V1C2	-0.839297	0	8	0	0	-5.12745	6.74838
1	-2.72218	GO:0032956	M1	1	0	GO Biological Processes	19	regulation of actin cytoskeleton organization	-2.72218	1.7484	3.25905	24155	344	1245	31	2.48996	0.441607	382|1398|1436|1739|1901|2241|2764|4035|4690|5156|5159|5295|5987|6093|6711|7010|8558|8829|9113|9353|9530|10097|10787|23191|50944|57381|57551|80206|84501|93663|374666	ARF6|CRK|CSF1R|DLG1|S1PR1|FER|GMFB|LRP1|NCK1|PDGFRA|PDGFRB|PIK3R1|TRIM27|ROCK1|SPTBN1|TEK|CDK10|NRP1|LATS1|SLIT2|BAG4|ACTR2|NCKAP1|CYFIP1|SHANK1|RHOJ|TAOK1|FHOD3|SPIRE2|ARHGAP18|WASH3P	-0.839297	0	16	0	0	-4.67817	3.2336
1	-2.72588	GO:0003158	M1	1	0	GO Biological Processes	19	endothelium development	-2.72588	2.26588	3.46379	24155	137	1245	16	1.28514	0.319214	182|1901|1903|2246|3084|4659|5912|6093|6935|7716|8829|51735|55897|57493|81575|81792	JAG1|S1PR1|S1PR3|FGF1|NRG1|PPP1R12A|RAP2B|ROCK1|ZEB1|VEZF1|NRP1|RAPGEF6|MESP1|HEG1|APOLD1|ADAMTS12	-0.839297	0	68	1	1	-2.72588	3.01803
1	-2.72196	GO:0030323	M1	1	0	GO Biological Processes	19	respiratory tube development	-2.72196	2.09449	3.39719	24155	176	1245	19	1.5261	0.347431	1385|2246|4015|4124|4323|5125|5156|5159|6678|9509|9618|10413|23414|51668|54542|57493|60485|64759|147372	CREB1|FGF1|LOX|MAN2A1|MMP14|PCSK5|PDGFRA|PDGFRB|SPARC|ADAMTS2|TRAF4|YAP1|ZFPM2|HSPB11|RC3H2|HEG1|SAV1|TNS3|CCBE1	-0.839297	0	69	1	1	-2.72196	2.09449
1	-2.72092	GO:0001816	M1	1	0	GO Biological Processes	19	cytokine production	-2.72092	1.46982	3.13397	24155	792	1245	60	4.81928	0.606989	19|1385|1386|1436|1652|1739|1903|2149|2335|2615|3091|3098|3624|3661|3665|3685|3717|4035|4155|4773|4791|5054|5074|5125|5294|5295|5621|5724|5781|5966|5987|6591|6711|6774|6868|7057|7099|7528|8832|9188|9252|10146|10312|10631|11315|22954|26060|26137|29126|55773|56919|57045|57493|63906|83737|89795|114548|147372|163486|170506	ABCA1|CREB1|ATF2|CSF1R|DDT|DLG1|S1PR3|F2R|FN1|LRRC32|HIF1A|HK1|INHBA|IRF3|IRF7|ITGAV|JAK2|LRP1|MBP|NFATC2|NFKB2|SERPINE1|PAWR|PCSK5|PIK3CG|PIK3R1|PRNP|PTAFR|PTPN11|REL|TRIM27|SNAI2|SPTBN1|STAT3|ADAM17|THBS1|TLR4|YY1|CD84|DDX21|RPS6KA5|G3BP1|TCIRG1|POSTN|PARK7|TRIM32|APPL1|ZBTB20|CD274|TBC1D23|DHX33|TWSG1|HEG1|GPATCH3|ITCH|NAV3|NLRP3|CCBE1|DENND1B|DHX36	-0.839297	0	70	1	1	-2.72092	2.12205
1	-2.71881	GO:0035987	M1	1	0	GO Biological Processes	19	endodermal cell differentiation	-2.71881	3.44917	3.83349	24155	45	1245	8	0.64257	0.226452	2335|3624|3676|3685|3693|4323|4324|55897	FN1|INHBA|ITGA4|ITGAV|ITGB5|MMP14|MMP15|MESP1	-0.839297	0	71	1	1	-2.71881	3.44917
1	-2.70885	GO:0001667	M1	1	0	GO Biological Processes	19	ameboidal-type cell migration	-2.70885	1.63074	3.19804	24155	464	1245	39	3.13253	0.493687	382|1948|2113|2241|2246|2335|3091|3373|3676|3690|4627|4921|5048|5168|5290|5781|6546|6678|6868|7010|7057|8754|8828|8829|9353|9530|9839|10000|10016|10519|23603|25960|26060|55897|57381|57608|64750|79812|147372	ARF6|EFNB2|ETS1|FER|FGF1|FN1|HIF1A|HYAL1|ITGA4|ITGB3|MYH9|DDR2|PAFAH1B1|ENPP2|PIK3CA|PTPN11|SLC8A1|SPARC|ADAM17|TEK|THBS1|ADAM9|NRP2|NRP1|SLIT2|BAG4|ZEB2|AKT3|PDCD6|CIB1|CORO1C|ADGRA2|APPL1|MESP1|RHOJ|JCAD|SMURF2|MMRN2|CCBE1	-0.835545	0	1	0	0	-8.54717	2.5568
1	-2.71079	GO:0051235	M1	1	0	GO Biological Processes	19	maintenance of location	-2.71079	1.76378	3.25669	24155	330	1245	30	2.40964	0.434605	19|580|857|2149|2200|3098|3685|3690|4644|5048|6546|7094|7220|7442|7529|7782|8204|8694|8996|9113|11079|11315|26580|50944|51608|54923|57584|114882|114885|128486	ABCA1|BARD1|CAV1|F2R|FBN1|HK1|ITGAV|ITGB3|MYO5A|PAFAH1B1|SLC8A1|TLN1|TRPC1|TRPV1|YWHAB|SLC30A4|NRIP1|DGAT1|NOL3|LATS1|RER1|PARK7|BSCL2|SHANK1|GET4|LIME1|ARHGAP21|OSBPL8|OSBPL11|FITM2	-0.835545	0	72	1	1	-2.71079	2.85318
1	-2.70774	GO:0051129	M1	1	0	GO Biological Processes	19	negative regulation of cellular component organization	-2.70774	1.48442	3.13087	24155	745	1245	57	4.57831	0.592368	367|382|857|1636|1901|1948|2048|2764|2932|3312|3949|4035|4131|4134|4241|4323|4976|5048|5195|5494|5621|6093|6259|6711|7057|7879|8558|8829|8996|9320|9353|9530|9711|10347|10519|10631|11315|23258|23603|25906|26060|50807|50944|54464|54998|55611|57551|79008|79598|79772|80206|84168|89795|96459|157922|338692|100134934	AR|ARF6|CAV1|ACE|S1PR1|EFNB2|EPHB2|GMFB|GSK3B|HSPA8|LDLR|LRP1|MAP1B|MAP4|MELTF|MMP14|OPA1|PAFAH1B1|PEX14|PPM1A|PRNP|ROCK1|RYK|SPTBN1|THBS1|RAB7A|CDK10|NRP1|NOL3|TRIP12|SLIT2|BAG4|RUBCN|ABCA7|CIB1|POSTN|PARK7|DENND5A|CORO1C|ANAPC15|APPL1|ASAP1|SHANK1|XRN1|AURKAIP1|OTUB1|TAOK1|SLX1B|CEP97|MCTP1|FHOD3|ANTXR1|NAV3|FNIP1|CAMSAP1|ANKRD13D|TEN1	-0.835545	0	73	1	1	-2.70774	1.48442
1	-2.70204	GO:0044089	M1	1	0	GO Biological Processes	19	positive regulation of cellular component biogenesis	-2.70204	1.57795	3.16935	24155	541	1245	44	3.53414	0.523292	19|382|545|857|1385|1739|1981|2048|2241|2764|2932|2967|3373|4131|4690|5899|5987|6093|7010|7099|7879|8829|9530|10097|10146|10787|23064|23116|23191|23768|49856|50807|51199|56919|79008|79969|84501|89795|96459|139818|170506|374666|386724|404672	ABCA1|ARF6|ATR|CAV1|CREB1|DLG1|EIF4G1|EPHB2|FER|GMFB|GSK3B|GTF2H3|HYAL1|MAP1B|NCK1|RALB|TRIM27|ROCK1|TEK|TLR4|RAB7A|NRP1|BAG4|ACTR2|G3BP1|NCKAP1|SETX|TOGARAM1|CYFIP1|FLRT2|WRAP73|ASAP1|NIN|DHX33|SLX1B|ATAT1|SPIRE2|NAV3|FNIP1|DOCK11|DHX36|WASH3P|AMIGO3|GTF2H5	-0.831877	0	16	0	0	-4.67817	3.2336
1	-2.69592	GO:0070125	M1	1	0	GO Biological Processes	19	mitochondrial translational elongation	-2.69592	2.61595	3.5603	24155	89	1245	12	0.963855	0.276897	6150|51069|54998|55052|64951|64960|64976|64983|65993|85476|118487|128308	MRPL23|MRPL2|AURKAIP1|MRPL20|MRPS24|MRPS15|MRPL40|MRPL32|MRPS34|GFM1|CHCHD1|MRPL55	-0.827777	0	24	0	0	-4.09469	2.61595
1	-2.68321	GO:0051169	M1	1	0	GO Biological Processes	19	nuclear transport	-2.68321	1.73829	3.22451	24155	346	1245	31	2.48996	0.441607	580|2932|3836|3840|4659|4928|5295|5469|5494|5781|6429|6774|7307|8086|11315|26060|26097|51042|51068|51194|51319|51715|51808|54439|54960|55374|55929|79228|84248|129138|503542	BARD1|GSK3B|KPNA1|KPNA4|PPP1R12A|NUP98|PIK3R1|MED1|PPM1A|PTPN11|SRSF4|STAT3|U2AF1|AAAS|PARK7|APPL1|CHTOP|ZNF593|NMD3|IPO11|RSRC1|RAB23|PHAX|RBM27|GEMIN8|TMCO6|DMAP1|THOC6|FYTTD1|ANKRD54|SPRN	-0.817091	0	67	0	0	-2.74185	1.77725
1	-2.68118	GO:0032271	M1	1	0	GO Biological Processes	19	regulation of protein polymerization	-2.68118	1.95796	3.31213	24155	218	1245	22	1.76707	0.373397	382|1739|2241|2764|4131|4690|5987|6711|9113|9353|9530|10097|10787|23116|23191|51199|80206|84501|89795|93663|157922|374666	ARF6|DLG1|FER|GMFB|MAP1B|NCK1|TRIM27|SPTBN1|LATS1|SLIT2|BAG4|ACTR2|NCKAP1|TOGARAM1|CYFIP1|NIN|FHOD3|SPIRE2|NAV3|ARHGAP18|CAMSAP1|WASH3P	-0.817058	0	16	0	0	-4.67817	3.2336
1	-2.67164	GO:0009150	M1	1	0	GO Biological Processes	19	purine ribonucleotide metabolic process	-2.67164	1.57214	3.14341	24155	543	1245	44	3.53414	0.523292	509|516|517|521|522|523|539|1350|1739|2977|3091|3098|3312|4695|4700|4716|4718|4725|4728|4729|4731|4832|4928|4976|6774|6818|8086|8694|9524|10476|10632|11315|26137|27089|29796|51715|57017|60490|79646|79717|93974|131870|374659|441531	ATP5F1C|ATP5MC1|ATP5MC2|ATP5ME|ATP5PF|ATP6V1A|ATP5PO|COX7C|DLG1|GUCY1A2|HIF1A|HK1|HSPA8|NDUFA2|NDUFA6|NDUFB10|NDUFC2|NDUFS5|NDUFS8|NDUFV2|NDUFV3|NME3|NUP98|OPA1|STAT3|SULT1A3|AAAS|DGAT1|TECR|ATP5PD|ATP5MG|PARK7|ZBTB20|UQCRQ|UQCR10|RAB23|COQ9|PPCDC|PANK3|PPCS|ATP5IF1|NUDT16|HDDC3|PGAM4	-0.809515	0	9	0	0	-5.12475	3.52756
1	-2.66676	GO:0031167	M1	1	0	GO Biological Processes	19	rRNA methylation	-2.66676	4.31147	4.01336	24155	27	1245	6	0.481928	0.196272	51093|55695|63899|79922|155400|260294	RRNAD1|NSUN5|NSUN3|MRM1|NSUN5P1|NSUN5P2	-0.806626	0	41	0	0	-3.39313	4.31147
1	-2.66406	GO:0002274	M1	1	0	GO Biological Processes	19	myeloid leukocyte activation	-2.66406	1.51529	3.11186	24155	653	1245	51	4.09639	0.561737	102|960|1773|2212|2241|2357|2358|2683|3312|3482|3685|3717|3949|4718|5294|5478|5660|5708|5724|5878|5912|6093|7057|7077|7099|7442|7879|8635|8694|8754|8832|9258|10097|10312|10450|11031|11322|22918|23191|23200|23317|25852|28956|51552|53916|53917|79169|83858|158747|196527|374395	ADAM10|CD44|DNASE1|FCGR2A|FER|FPR1|FPR2|B4GALT1|HSPA8|IGF2R|ITGAV|JAK2|LDLR|NDUFC2|PIK3CG|PPIA|PSAP|PSMD2|PTAFR|RAB5C|RAP2B|ROCK1|THBS1|TIMP2|TLR4|TRPV1|RAB7A|RNASET2|DGAT1|ADAM9|CD84|MFHAS1|ACTR2|TCIRG1|PPIE|RAB31|TMC6|CD93|CYFIP1|ATP11B|DNAJC13|ARMC8|LAMTOR2|RAB14|RAB4B|RAB24|C1orf35|ATAD3B|MOSPD2|ANO6|TMEM179B	-0.805908	0	38	0	0	-3.48878	1.68101
1	-2.65558	GO:0033628	M1	1	0	GO Biological Processes	19	regulation of cell adhesion mediated by integrin	-2.65558	3.37419	3.75727	24155	46	1245	8	0.64257	0.226452	1398|5054|5294|5420|5781|6591|8754|10519	CRK|SERPINE1|PIK3CG|PODXL|PTPN11|SNAI2|ADAM9|CIB1	-0.799395	0	11	0	0	-5.10632	3.99445
1	-2.64305	GO:0006511	M1	1	0	GO Biological Processes	19	ubiquitin-dependent protein catabolic process	-2.64305	1.52597	3.10057	24155	623	1245	49	3.93574	0.551074	550|857|2932|5708|6135|6400|6478|7327|7328|9113|9320|9690|10134|11101|11315|11342|22954|25852|25906|26233|27246|28996|51035|51160|54467|55139|55336|56254|57563|64682|64750|79016|79176|79718|80279|83737|83892|84640|84993|90864|91544|93611|118424|130617|151636|158880|165918|219333|253980	AUP1|CAV1|GSK3B|PSMD2|RPL11|SEL1L|SIAH2|UBE2G2|UBE2H|LATS1|TRIP12|UBE3C|BCAP31|ATE1|PARK7|RNF13|TRIM32|ARMC8|ANAPC15|FBXL6|RNF115|HIPK2|UBXN1|VPS28|ANKIB1|ANKZF1|FBXL8|RNF20|KLHL8|ANAPC1|SMURF2|DDA1|FBXL15|TBL1XR1|CDK5RAP3|ITCH|KCTD10|USP38|UBL7|SPSB3|UBXN11|FBXO44|UBE2J2|ZFAND2B|DTX3L|USP51|RNF168|USP12|KCTD13	-0.788825	0	39	0	0	-3.40714	1.7524
1	-2.61798	GO:0009896	M1	1	0	GO Biological Processes	19	positive regulation of catabolic process	-2.61798	1.64731	3.13474	24155	424	1245	36	2.89157	0.474909	580|857|1797|2932|3091|3949|4035|5261|5291|5899|6093|7879|8754|10134|10641|11043|11315|22954|25807|25976|26088|26137|27352|51160|54467|54543|64750|79016|80279|83737|92140|93974|151636|160418|170506|400410	BARD1|CAV1|DXO|GSK3B|HIF1A|LDLR|LRP1|PHKG2|PIK3CB|RALB|ROCK1|RAB7A|ADAM9|BCAP31|NPRL2|MID2|PARK7|TRIM32|RHBDD3|TIPARP|GGA1|ZBTB20|SGSM3|VPS28|ANKIB1|TOMM7|SMURF2|DDA1|CDK5RAP3|ITCH|MTDH|ATP5IF1|DTX3L|TMTC3|DHX36|ST20	-0.786539	0	25	0	0	-4.08238	1.93507
1	-2.61458	GO:0061643	M1	1	0	GO Biological Processes	19	chemorepulsion of axon	-2.61458	9.7008	4.96881	24155	6	1245	3	0.240964	0.138953	6259|8633|91584	RYK|UNC5C|PLXNA4	-0.786539	0	27	0	0	-4.02211	9.7008
1	-2.62833	GO:0006302	M1	1	0	GO Biological Processes	19	double-strand break repair	-2.62833	1.87757	3.23828	24155	248	1245	24	1.92771	0.389681	580|2140|5965|7528|9320|9400|10097|10519|23064|25939|27434|51149|55183|55611|79008|84309|84501|125150|126074|131870|151636|151987|158880|165918	BARD1|EYA3|RECQL|YY1|TRIP12|RECQL5|ACTR2|CIB1|SETX|SAMHD1|POLM|MRNIP|RIF1|OTUB1|SLX1B|NUDT16L1|SPIRE2|ZSWIM7|SWSAP1|NUDT16|DTX3L|PPP4R2|USP51|RNF168	-0.786539	0	30	0	0	-3.92727	4.8504
1	-2.63679	GO:0042119	M1	1	0	GO Biological Processes	19	neutrophil activation	-2.63679	1.59412	3.12623	24155	499	1245	41	3.29317	0.505768	102|960|1773|2212|2357|2358|2683|3312|3482|3685|4718|5478|5660|5708|5724|5878|5912|6093|7077|7879|8635|8694|10097|10312|10450|11031|11322|22918|23191|23200|23317|25852|28956|51552|53916|53917|79169|83858|158747|196527|374395	ADAM10|CD44|DNASE1|FCGR2A|FPR1|FPR2|B4GALT1|HSPA8|IGF2R|ITGAV|NDUFC2|PPIA|PSAP|PSMD2|PTAFR|RAB5C|RAP2B|ROCK1|TIMP2|RAB7A|RNASET2|DGAT1|ACTR2|TCIRG1|PPIE|RAB31|TMC6|CD93|CYFIP1|ATP11B|DNAJC13|ARMC8|LAMTOR2|RAB14|RAB4B|RAB24|C1orf35|ATAD3B|MOSPD2|ANO6|TMEM179B	-0.786539	0	38	0	0	-3.48878	1.68101
1	-2.62654	GO:0002275	M1	1	0	GO Biological Processes	19	myeloid cell activation involved in immune response	-2.62654	1.5635	3.10469	24155	546	1245	44	3.53414	0.523292	102|960|1773|2212|2241|2357|2358|2683|3312|3482|3685|4718|5294|5478|5660|5708|5724|5878|5912|6093|7077|7879|8635|8694|8832|10097|10312|10450|11031|11322|22918|23191|23200|23317|25852|28956|51552|53916|53917|79169|83858|158747|196527|374395	ADAM10|CD44|DNASE1|FCGR2A|FER|FPR1|FPR2|B4GALT1|HSPA8|IGF2R|ITGAV|NDUFC2|PIK3CG|PPIA|PSAP|PSMD2|PTAFR|RAB5C|RAP2B|ROCK1|TIMP2|RAB7A|RNASET2|DGAT1|CD84|ACTR2|TCIRG1|PPIE|RAB31|TMC6|CD93|CYFIP1|ATP11B|DNAJC13|ARMC8|LAMTOR2|RAB14|RAB4B|RAB24|C1orf35|ATAD3B|MOSPD2|ANO6|TMEM179B	-0.786539	0	38	0	0	-3.48878	1.68101
1	-2.6142	GO:0010812	M1	1	0	GO Biological Processes	19	negative regulation of cell-substrate adhesion	-2.6142	2.85318	3.56736	24155	68	1245	10	0.803213	0.252976	182|4035|4241|4323|5054|5295|7057|8324|10631|23603	JAG1|LRP1|MELTF|MMP14|SERPINE1|PIK3R1|THBS1|FZD7|POSTN|CORO1C	-0.786539	0	53	0	0	-3.05732	5.06129
1	-2.61458	GO:1901166	M1	1	0	GO Biological Processes	19	neural crest cell migration involved in autonomic nervous system development	-2.61458	9.7008	4.96881	24155	6	1245	3	0.240964	0.138953	2335|8828|8829	FN1|NRP2|NRP1	-0.786539	0	60	0	0	-2.89862	11.641
1	-2.61953	GO:0048008	M1	1	0	GO Biological Processes	19	platelet-derived growth factor receptor signaling pathway	-2.61953	3.06341	3.6358	24155	57	1245	9	0.722892	0.240091	2241|3717|4015|4035|5156|5159|5781|8829|25976	FER|JAK2|LOX|LRP1|PDGFRA|PDGFRB|PTPN11|NRP1|TIPARP	-0.786539	0	64	0	0	-2.78407	8.31497
1	-2.6142	GO:0035924	M1	1	0	GO Biological Processes	19	cellular response to vascular endothelial growth factor stimulus	-2.6142	2.85318	3.56736	24155	68	1245	10	0.803213	0.252976	2081|2321|5156|5159|8828|8829|25960|57608|81792|147372	ERN1|FLT1|PDGFRA|PDGFRB|NRP2|NRP1|ADGRA2|JCAD|ADAMTS12|CCBE1	-0.786539	0	64	0	0	-2.78407	8.31497
1	-2.6142	GO:0019915	M1	1	0	GO Biological Processes	19	lipid storage	-2.6142	2.85318	3.56736	24155	68	1245	10	0.803213	0.252976	19|857|3685|3690|8204|8694|26580|114882|114885|128486	ABCA1|CAV1|ITGAV|ITGB3|NRIP1|DGAT1|BSCL2|OSBPL8|OSBPL11|FITM2	-0.786539	0	72	0	0	-2.71079	2.85318
1	-2.62301	GO:0006979	M1	1	0	GO Biological Processes	19	response to oxidative stress	-2.62301	1.62392	3.12854	24155	454	1245	38	3.05221	0.487519	1398|1571|2113|2241|2530|3091|3373|3717|3840|4323|4700|4728|5074|5156|5159|5599|5621|5660|5796|6546|7099|8455|8754|8996|9131|9973|11315|22850|22921|23064|25824|29957|55074|55139|79661|79772|253827|375748	CRK|CYP2E1|ETS1|FER|FUT8|HIF1A|HYAL1|JAK2|KPNA4|MMP14|NDUFA6|NDUFS8|PAWR|PDGFRA|PDGFRB|MAPK8|PRNP|PSAP|PTPRK|SLC8A1|TLR4|ATRN|ADAM9|NOL3|AIFM1|CCS|PARK7|ADNP2|MSRB2|SETX|PRDX5|SLC25A24|OXR1|ANKZF1|NEIL1|MCTP1|MSRB3|ERCC6L2	-0.786539	0	74	1	1	-2.62301	1.74864
1	-2.61953	GO:0060760	M1	1	0	GO Biological Processes	19	positive regulation of response to cytokine stimulus	-2.61953	3.06341	3.6358	24155	57	1245	9	0.722892	0.240091	3091|3661|3665|5048|5469|6868|7099|22954|54765	HIF1A|IRF3|IRF7|PAFAH1B1|MED1|ADAM17|TLR4|TRIM32|TRIM44	-0.786539	0	75	1	1	-2.61953	3.10426
1	-2.61458	GO:0050904	M1	1	0	GO Biological Processes	19	diapedesis	-2.61458	9.7008	4.96881	24155	6	1245	3	0.240964	0.138953	1398|2241|3676	CRK|FER|ITGA4	-0.786539	0	76	1	1	-2.61458	9.7008
1	-2.61458	GO:0030091	M1	1	0	GO Biological Processes	19	protein repair	-2.61458	9.7008	4.96881	24155	6	1245	3	0.240964	0.138953	11315|22921|253827	PARK7|MSRB2|MSRB3	-0.786539	0	77	1	1	-2.61458	9.7008
1	-2.60524	GO:0034660	M1	1	0	GO Biological Processes	19	ncRNA metabolic process	-2.60524	1.55075	3.08243	24155	563	1245	45	3.61446	0.528984	904|2957|6135|8568|9188|9329|22803|23536|27079|51013|51077|51093|51367|51547|51808|54059|54464|54522|54542|54606|54663|54938|54973|55272|55695|58490|63899|64852|79922|80237|80755|81890|83707|84309|84705|92345|126789|131870|134637|153443|155400|260294|284119|339487|404672	CCNT1|GTF2A1|RPL11|RRP1|DDX21|GTF3C4|XRN2|ADAT1|RPUSD2|EXOSC1|FCF1|RRNAD1|POP5|SIRT7|PHAX|YBEY|XRN1|ANKRD16|RC3H2|DDX56|WDR74|SARS2|INTS11|IMP3|NSUN5|RPRD1B|NSUN3|TUT1|MRM1|ELL3|AARSD1|QTRT1|TRPT1|NUDT16L1|GTPBP3|NAF1|PUSL1|NUDT16|ADAT2|SRFBP1|NSUN5P1|NSUN5P2|CAVIN1|ZBTB8OS|GTF2H5	-0.781466	0	41	0	0	-3.39313	4.31147
1	-2.60364	GO:0021826	M1	1	0	GO Biological Processes	19	substrate-independent telencephalic tangential migration	-2.60364	6.4672	4.41598	24155	12	1245	4	0.321285	0.160384	3084|6586|9353|200894	NRG1|SLIT3|SLIT2|ARL13B	-0.781466	0	57	0	0	-2.94001	11.641
1	-2.60364	GO:0021843	M1	1	0	GO Biological Processes	19	substrate-independent telencephalic tangential interneuron migration	-2.60364	6.4672	4.41598	24155	12	1245	4	0.321285	0.160384	3084|6586|9353|200894	NRG1|SLIT3|SLIT2|ARL13B	-0.781466	0	57	0	0	-2.94001	11.641
1	-2.59973	GO:0043312	M1	1	0	GO Biological Processes	19	neutrophil degranulation	-2.59973	1.59684	3.09851	24155	486	1245	40	3.21285	0.499769	102|960|2212|2357|2358|2683|3312|3482|3685|4718|5478|5660|5708|5724|5878|5912|6093|7077|7879|8635|8694|10097|10312|10450|11031|11322|22918|23191|23200|23317|25852|28956|51552|53916|53917|79169|83858|158747|196527|374395	ADAM10|CD44|FCGR2A|FPR1|FPR2|B4GALT1|HSPA8|IGF2R|ITGAV|NDUFC2|PPIA|PSAP|PSMD2|PTAFR|RAB5C|RAP2B|ROCK1|TIMP2|RAB7A|RNASET2|DGAT1|ACTR2|TCIRG1|PPIE|RAB31|TMC6|CD93|CYFIP1|ATP11B|DNAJC13|ARMC8|LAMTOR2|RAB14|RAB4B|RAB24|C1orf35|ATAD3B|MOSPD2|ANO6|TMEM179B	-0.779366	0	38	0	0	-3.48878	1.68101
1	-2.59306	GO:0071902	M1	1	0	GO Biological Processes	19	positive regulation of protein serine/threonine kinase activity	-2.59306	1.73229	3.15105	24155	336	1245	30	2.40964	0.434605	904|1398|1436|1464|2081|2149|2246|2321|2357|3084|3672|3717|4515|5159|5291|5294|5781|5899|6868|7057|7099|8754|8792|9839|10519|10746|11183|23118|28956|57551	CCNT1|CRK|CSF1R|CSPG4|ERN1|F2R|FGF1|FLT1|FPR1|NRG1|ITGA1|JAK2|MTCP1|PDGFRB|PIK3CB|PIK3CG|PTPN11|RALB|ADAM17|THBS1|TLR4|ADAM9|TNFRSF11A|ZEB2|CIB1|MAP3K2|MAP4K5|TAB2|LAMTOR2|TAOK1	-0.778086	0	20	0	0	-4.49707	1.86442
1	-2.59457	GO:0048729	M1	1	0	GO Biological Processes	19	tissue morphogenesis	-2.59457	1.49686	3.04981	24155	674	1245	52	4.17671	0.56698	182|367|960|1281|1282|1293|1427|1436|1739|1901|1909|1948|2132|2246|3084|3091|3624|3690|4194|4323|4638|4919|5048|5420|5469|5708|6259|6591|6868|8324|8516|8828|8829|9095|9353|9839|10082|10413|10640|10672|23002|23414|50855|55897|57045|57493|64750|81792|91355|126695|200894|388591	JAG1|AR|CD44|COL3A1|COL4A1|COL6A3|CRYGS|CSF1R|DLG1|S1PR1|EDNRA|EFNB2|EXT2|FGF1|NRG1|HIF1A|INHBA|ITGB3|MDM4|MMP14|MYLK|ROR1|PAFAH1B1|PODXL|MED1|PSMD2|RYK|SNAI2|ADAM17|FZD7|ITGA8|NRP2|NRP1|TBX19|SLIT2|ZEB2|GPC6|YAP1|EXOC5|GNA13|DAAM1|ZFPM2|PARD6A|MESP1|TWSG1|HEG1|SMURF2|ADAMTS12|LRP5L|KDF1|ARL13B|RNF207	-0.778086	0	29	0	0	-3.94885	2.1056
1	-2.59655	GO:0043112	M1	1	0	GO Biological Processes	19	receptor metabolic process	-2.59655	2.00017	3.26052	24155	194	1245	20	1.60643	0.356311	857|1948|2530|3084|3091|3685|3690|3717|4035|10203|11031|11149|11315|22853|30845|30849|55681|83737|151636|338692	CAV1|EFNB2|FUT8|NRG1|HIF1A|ITGAV|ITGB3|JAK2|LRP1|CALCRL|RAB31|BVES|PARK7|LMTK2|EHD3|PIK3R4|SCYL2|ITCH|DTX3L|ANKRD13D	-0.778086	0	78	1	1	-2.59655	4.21774
1	-2.58145	GO:0001501	M1	1	0	GO Biological Processes	19	skeletal system development	-2.58145	1.5731	3.07375	24155	518	1245	42	3.37349	0.511686	166|632|960|1009|1281|1293|1739|2101|2200|2767|3091|3373|4015|4323|4883|5048|5125|5156|5469|5781|6259|6399|6591|6660|6678|6935|7010|7045|7092|10019|10682|22856|25976|51320|51360|51668|51715|56987|80856|81792|91355|196527	TLE5|BGLAP|CD44|CDH11|COL3A1|COL6A3|DLG1|ESRRA|FBN1|GNA11|HIF1A|HYAL1|LOX|MMP14|NPR3|PAFAH1B1|PCSK5|PDGFRA|MED1|PTPN11|RYK|TRAPPC2|SNAI2|SOX5|SPARC|ZEB1|TEK|TGFBI|TLL1|SH2B3|EBP|CHSY1|TIPARP|MEX3C|MBTPS2|HSPB11|RAB23|BBX|LNPK|ADAMTS12|LRP5L|ANO6	-0.768266	0	79	1	1	-2.58145	1.5731
1	-2.57496	GO:0032091	M1	1	0	GO Biological Processes	19	negative regulation of protein binding	-2.57496	2.4252	3.39541	24155	104	1245	13	1.04418	0.288087	166|857|1636|2932|3676|5195|5599|5899|6093|11315|59343|80011|129531	TLE5|CAV1|ACE|GSK3B|ITGA4|PEX14|MAPK8|RALB|ROCK1|PARK7|SENP2|FAM192A|MITD1	-0.765317	0	23	0	0	-4.20995	2.92067
1	-2.57496	GO:2001237	M1	1	0	GO Biological Processes	19	negative regulation of extrinsic apoptotic signaling pathway	-2.57496	2.4252	3.39541	24155	104	1245	13	1.04418	0.288087	367|2140|3685|5054|6478|6591|7057|8797|8829|8996|9821|10413|11315	AR|EYA3|ITGAV|SERPINE1|SIAH2|SNAI2|THBS1|TNFRSF10A|NRP1|NOL3|RB1CC1|YAP1|PARK7	-0.765317	0	34	0	0	-3.61525	2.4252
1	-2.5663	GO:0071900	M1	1	0	GO Biological Processes	19	regulation of protein serine/threonine kinase activity	-2.5663	1.57007	3.06051	24155	519	1245	42	3.37349	0.511686	857|904|1398|1436|1464|2048|2081|2149|2246|2321|2357|3084|3672|3717|4485|4515|5159|5291|5294|5781|5899|6868|7057|7099|8754|8792|9113|9839|10019|10519|10746|10983|11183|23118|28956|51755|54923|57493|57551|80279|81669|124790	CAV1|CCNT1|CRK|CSF1R|CSPG4|EPHB2|ERN1|F2R|FGF1|FLT1|FPR1|NRG1|ITGA1|JAK2|MST1|MTCP1|PDGFRB|PIK3CB|PIK3CG|PTPN11|RALB|ADAM17|THBS1|TLR4|ADAM9|TNFRSF11A|LATS1|ZEB2|SH2B3|CIB1|MAP3K2|CCNI|MAP4K5|TAB2|LAMTOR2|CDK12|LIME1|HEG1|TAOK1|CDK5RAP3|CCNL2|HEXIM2	-0.760177	0	20	0	0	-4.49707	1.86442
1	-2.56632	GO:0030166	M1	1	0	GO Biological Processes	19	proteoglycan biosynthetic process	-2.56632	2.81183	3.51338	24155	69	1245	10	0.803213	0.252976	1464|2132|3340|9469|9953|22856|29940|51363|55454|79690	CSPG4|EXT2|NDST1|CHST3|HS3ST3B1|CHSY1|DSE|CHST15|CSGALNACT2|GAL3ST4	-0.760177	0	33	0	0	-3.78704	4.47729
1	-2.56084	GO:0071375	M1	1	0	GO Biological Processes	19	cellular response to peptide hormone stimulus	-2.56084	1.74194	3.12937	24155	323	1245	29	2.32932	0.427476	523|632|857|1385|1398|2101|2200|2241|2932|3717|4131|4644|4690|4976|5290|5295|5781|6093|6774|7391|10312|11031|23191|26060|55667|57085|114814|114882|245973	ATP6V1A|BGLAP|CAV1|CREB1|CRK|ESRRA|FBN1|FER|GSK3B|JAK2|MAP1B|MYO5A|NCK1|OPA1|PIK3CA|PIK3R1|PTPN11|ROCK1|STAT3|USF1|TCIRG1|RAB31|CYFIP1|APPL1|DENND4C|AGTRAP|GNRHR2|OSBPL8|ATP6V1C2	-0.760043	0	7	0	0	-5.40262	1.87757
1	-2.56317	GO:0072521	M1	1	0	GO Biological Processes	19	purine-containing compound metabolic process	-2.56317	1.51921	3.03543	24155	613	1245	48	3.85542	0.545649	509|516|517|521|522|523|539|1350|1739|2977|2980|3091|3098|3312|4695|4700|4716|4718|4725|4728|4729|4731|4832|4928|4976|6774|6818|8086|8694|9524|10476|10591|10632|11315|25939|26137|27089|28992|29796|51715|57017|60490|79646|79717|93974|131870|374659|441531	ATP5F1C|ATP5MC1|ATP5MC2|ATP5ME|ATP5PF|ATP6V1A|ATP5PO|COX7C|DLG1|GUCY1A2|GUCA2A|HIF1A|HK1|HSPA8|NDUFA2|NDUFA6|NDUFB10|NDUFC2|NDUFS5|NDUFS8|NDUFV2|NDUFV3|NME3|NUP98|OPA1|STAT3|SULT1A3|AAAS|DGAT1|TECR|ATP5PD|DNPH1|ATP5MG|PARK7|SAMHD1|ZBTB20|UQCRQ|MACROD1|UQCR10|RAB23|COQ9|PPCDC|PANK3|PPCS|ATP5IF1|NUDT16|HDDC3|PGAM4	-0.760043	0	9	0	0	-5.12475	3.52756
1	-2.55922	GO:0036230	M1	1	0	GO Biological Processes	19	granulocyte activation	-2.55922	1.57831	3.05854	24155	504	1245	41	3.29317	0.505768	102|960|1773|2212|2357|2358|2683|3312|3482|3685|4718|5478|5660|5708|5724|5878|5912|6093|7077|7879|8635|8694|10097|10312|10450|11031|11322|22918|23191|23200|23317|25852|28956|51552|53916|53917|79169|83858|158747|196527|374395	ADAM10|CD44|DNASE1|FCGR2A|FPR1|FPR2|B4GALT1|HSPA8|IGF2R|ITGAV|NDUFC2|PPIA|PSAP|PSMD2|PTAFR|RAB5C|RAP2B|ROCK1|TIMP2|RAB7A|RNASET2|DGAT1|ACTR2|TCIRG1|PPIE|RAB31|TMC6|CD93|CYFIP1|ATP11B|DNAJC13|ARMC8|LAMTOR2|RAB14|RAB4B|RAB24|C1orf35|ATAD3B|MOSPD2|ANO6|TMEM179B	-0.760043	0	38	0	0	-3.48878	1.68101
1	-2.56025	GO:0019941	M1	1	0	GO Biological Processes	19	modification-dependent protein catabolic process	-2.56025	1.51141	3.02963	24155	629	1245	49	3.93574	0.551074	550|857|2932|5708|6135|6400|6478|7327|7328|9113|9320|9690|10134|11101|11315|11342|22954|25852|25906|26233|27246|28996|51035|51160|54467|55139|55336|56254|57563|64682|64750|79016|79176|79718|80279|83737|83892|84640|84993|90864|91544|93611|118424|130617|151636|158880|165918|219333|253980	AUP1|CAV1|GSK3B|PSMD2|RPL11|SEL1L|SIAH2|UBE2G2|UBE2H|LATS1|TRIP12|UBE3C|BCAP31|ATE1|PARK7|RNF13|TRIM32|ARMC8|ANAPC15|FBXL6|RNF115|HIPK2|UBXN1|VPS28|ANKIB1|ANKZF1|FBXL8|RNF20|KLHL8|ANAPC1|SMURF2|DDA1|FBXL15|TBL1XR1|CDK5RAP3|ITCH|KCTD10|USP38|UBL7|SPSB3|UBXN11|FBXO44|UBE2J2|ZFAND2B|DTX3L|USP51|RNF168|USP12|KCTD13	-0.760043	0	39	0	0	-3.40714	1.7524
1	-2.55174	GO:0022904	M1	1	0	GO Biological Processes	19	respiratory electron transport chain	-2.55174	2.32156	3.34039	24155	117	1245	14	1.1245	0.29884	1350|4695|4700|4716|4718|4725|4728|4729|4731|11315|27089|29796|57017|728294	COX7C|NDUFA2|NDUFA6|NDUFB10|NDUFC2|NDUFS5|NDUFS8|NDUFV2|NDUFV3|PARK7|UQCRQ|UQCR10|COQ9|D2HGDH	-0.75428	0	9	0	0	-5.12475	3.52756
1	-2.54269	GO:0048667	M1	1	0	GO Biological Processes	19	cell morphogenesis involved in neuron differentiation	-2.54269	1.53083	3.02453	24155	583	1245	46	3.69478	0.534607	102|1009|1385|1436|1944|1948|2048|2335|2932|3676|4035|4131|4976|5048|5290|5291|5295|5781|6259|6498|6586|6711|7204|8609|8633|8828|8829|9252|9334|9353|9839|10097|10154|11313|23022|23191|23768|26037|30011|50944|51199|91584|91624|113246|118813|170506	ADAM10|CDH11|CREB1|CSF1R|EFNA3|EFNB2|EPHB2|FN1|GSK3B|ITGA4|LRP1|MAP1B|OPA1|PAFAH1B1|PIK3CA|PIK3CB|PIK3R1|PTPN11|RYK|SKIL|SLIT3|SPTBN1|TRIO|KLF7|UNC5C|NRP2|NRP1|RPS6KA5|B4GALT5|SLIT2|ZEB2|ACTR2|PLXNC1|LYPLA2|PALLD|CYFIP1|FLRT2|SIPA1L1|SH3KBP1|SHANK1|NIN|PLXNA4|NEXN|C12orf57|ZFYVE27|DHX36	-0.750357	0	2	0	0	-7.50906	1.96166
1	-2.54424	GO:0043299	M1	1	0	GO Biological Processes	19	leukocyte degranulation	-2.54424	1.55647	3.03712	24155	536	1245	43	3.45382	0.517526	102|960|2212|2241|2357|2358|2683|3312|3482|3685|4718|5294|5478|5660|5708|5724|5878|5912|6093|7077|7879|8635|8694|8832|10097|10312|10450|11031|11322|22918|23191|23200|23317|25852|28956|51552|53916|53917|79169|83858|158747|196527|374395	ADAM10|CD44|FCGR2A|FER|FPR1|FPR2|B4GALT1|HSPA8|IGF2R|ITGAV|NDUFC2|PIK3CG|PPIA|PSAP|PSMD2|PTAFR|RAB5C|RAP2B|ROCK1|TIMP2|RAB7A|RNASET2|DGAT1|CD84|ACTR2|TCIRG1|PPIE|RAB31|TMC6|CD93|CYFIP1|ATP11B|DNAJC13|ARMC8|LAMTOR2|RAB14|RAB4B|RAB24|C1orf35|ATAD3B|MOSPD2|ANO6|TMEM179B	-0.750357	0	38	0	0	-3.48878	1.68101
1	-2.54481	GO:0030307	M1	1	0	GO Biological Processes	19	positive regulation of cell growth	-2.54481	2.06644	3.24316	24155	169	1245	18	1.44578	0.338302	102|1981|1982|2335|3373|4035|4131|4323|5048|6868|8829|10519|10591|22850|22954|23191|118813|221927	ADAM10|EIF4G1|EIF4G2|FN1|HYAL1|LRP1|MAP1B|MMP14|PAFAH1B1|ADAM17|NRP1|CIB1|DNPH1|ADNP2|TRIM32|CYFIP1|ZFYVE27|BRAT1	-0.750357	0	40	0	0	-3.40307	3.1584
1	-2.53534	GO:0007034	M1	1	0	GO Biological Processes	19	vacuolar transport	-2.53534	2.17081	3.27346	24155	143	1245	16	1.28514	0.319214	3312|3482|4035|5660|7879|8031|9392|26276|30845|30849|51160|55681|55850|79158|151636|374666	HSPA8|IGF2R|LRP1|PSAP|RAB7A|NCOA4|TGFBRAP1|VPS33B|EHD3|PIK3R4|VPS28|SCYL2|USE1|GNPTAB|DTX3L|WASH3P	-0.747024	0	58	0	0	-2.9231	4.61943
1	-2.5343	GO:0048745	M1	1	0	GO Biological Processes	19	smooth muscle tissue development	-2.5343	4.8504	4.01573	24155	20	1245	5	0.401606	0.179243	1281|1739|4638|8516|25976	COL3A1|DLG1|MYLK|ITGA8|TIPARP	-0.747024	0	80	1	1	-2.5343	4.8504
1	-2.5343	GO:0030220	M1	1	0	GO Biological Processes	19	platelet formation	-2.5343	4.8504	4.01573	24155	20	1245	5	0.401606	0.179243	87|842|4627|5781|10519	ACTN1|CASP9|MYH9|PTPN11|CIB1	-0.747024	0	81	1	1	-2.5343	4.8504
1	-2.52906	GO:0000209	M1	1	0	GO Biological Processes	19	protein polyubiquitination	-2.52906	1.7524	3.10813	24155	310	1245	28	2.249	0.420214	580|4012|5708|5987|6478|7327|7328|9320|9690|22954|27246|54467|54542|54765|55336|55611|56254|64682|64750|79176|80829|83737|93611|114907|118424|151636|165918|257218	BARD1|LNPEP|PSMD2|TRIM27|SIAH2|UBE2G2|UBE2H|TRIP12|UBE3C|TRIM32|RNF115|ANKIB1|RC3H2|TRIM44|FBXL8|OTUB1|RNF20|ANAPC1|SMURF2|FBXL15|ZFP91|ITCH|FBXO44|FBXO32|UBE2J2|DTX3L|RNF168|SHPRH	-0.743453	0	39	0	0	-3.40714	1.7524
1	-2.50489	GO:0050673	M1	1	0	GO Biological Processes	19	epithelial cell proliferation	-2.50489	1.60955	3.02891	24155	446	1245	37	2.97189	0.481261	367|687|857|1386|1739|1948|2081|2246|2321|2683|3091|3373|3676|3690|4323|4485|5291|5469|5796|6591|6678|6774|6868|7010|7057|8324|8828|8829|10000|10016|10413|57608|60485|64743|93974|126695|135228	AR|KLF9|CAV1|ATF2|DLG1|EFNB2|ERN1|FGF1|FLT1|B4GALT1|HIF1A|HYAL1|ITGA4|ITGB3|MMP14|MST1|PIK3CB|MED1|PTPRK|SNAI2|SPARC|STAT3|ADAM17|TEK|THBS1|FZD7|NRP2|NRP1|AKT3|PDCD6|YAP1|JCAD|SAV1|WDR13|ATP5IF1|KDF1|CD109	-0.728144	0	1	0	0	-8.54717	2.5568
1	-2.51197	GO:0032535	M1	1	0	GO Biological Processes	19	regulation of cellular component size	-2.51197	1.67798	3.06359	24155	370	1245	32	2.57028	0.448489	382|1385|1739|2241|2335|2764|2932|3575|4035|4131|4690|5048|5987|6259|6711|8829|9113|9353|9530|9821|10000|10097|10787|23191|56262|80206|84501|91584|93663|118813|196527|374666	ARF6|CREB1|DLG1|FER|FN1|GMFB|GSK3B|IL7R|LRP1|MAP1B|NCK1|PAFAH1B1|TRIM27|RYK|SPTBN1|NRP1|LATS1|SLIT2|BAG4|RB1CC1|AKT3|ACTR2|NCKAP1|CYFIP1|LRRC8A|FHOD3|SPIRE2|PLXNA4|ARHGAP18|ZFYVE27|ANO6|WASH3P	-0.728144	0	16	0	0	-4.67817	3.2336
1	-2.49835	GO:0043405	M1	1	0	GO Biological Processes	19	regulation of MAP kinase activity	-2.49835	1.70689	3.06462	24155	341	1245	30	2.40964	0.434605	857|1398|1464|2048|2081|2149|2246|2321|2357|3084|3672|3717|5159|5291|5294|5781|7057|7099|8754|8792|9839|10019|10746|11183|23118|28956|51755|54923|57551|80279	CAV1|CRK|CSPG4|EPHB2|ERN1|F2R|FGF1|FLT1|FPR1|NRG1|ITGA1|JAK2|PDGFRB|PIK3CB|PIK3CG|PTPN11|THBS1|TLR4|ADAM9|TNFRSF11A|ZEB2|SH2B3|MAP3K2|MAP4K5|TAB2|LAMTOR2|CDK12|LIME1|TAOK1|CDK5RAP3	-0.728144	0	20	0	0	-4.49707	1.86442
1	-2.49736	GO:0097190	M1	1	0	GO Biological Processes	19	apoptotic signaling pathway	-2.49736	1.51474	2.98148	24155	602	1245	47	3.7751	0.540161	367|842|857|960|2081|2140|2932|3091|3624|3685|3717|4690|4976|5054|5062|5074|5295|5599|5883|6135|6478|6498|6591|7057|7099|7529|7755|8406|8797|8829|8996|9131|9821|10016|10134|10413|10519|10955|11315|22954|26060|28996|55367|80237|89941|93974|400410	AR|CASP9|CAV1|CD44|ERN1|EYA3|GSK3B|HIF1A|INHBA|ITGAV|JAK2|NCK1|OPA1|SERPINE1|PAK2|PAWR|PIK3R1|MAPK8|RAD9A|RPL11|SIAH2|SKIL|SNAI2|THBS1|TLR4|YWHAB|ZNF205|SRPX|TNFRSF10A|NRP1|NOL3|AIFM1|RB1CC1|PDCD6|BCAP31|YAP1|CIB1|SERINC3|PARK7|TRIM32|APPL1|HIPK2|PIDD1|ELL3|RHOT2|ATP5IF1|ST20	-0.728144	0	34	0	0	-3.61525	2.4252
1	-2.49777	GO:0042254	M1	1	0	GO Biological Processes	19	ribosome biogenesis	-2.49777	1.76378	3.08743	24155	297	1245	27	2.16867	0.412811	6135|8568|9188|22803|27079|51013|51042|51068|51077|51093|51367|54059|54606|54663|55052|55272|55695|63899|79922|83939|92345|131870|153443|155400|220064|260294|404672	RPL11|RRP1|DDX21|XRN2|RPUSD2|EXOSC1|ZNF593|NMD3|FCF1|RRNAD1|POP5|YBEY|DDX56|WDR74|MRPL20|IMP3|NSUN5|NSUN3|MRM1|EIF2A|NAF1|NUDT16|SRFBP1|NSUN5P1|LTO1|NSUN5P2|GTF2H5	-0.728144	0	41	0	0	-3.39313	4.31147
1	-2.49955	GO:0006929	M1	1	0	GO Biological Processes	19	substrate-dependent cell migration	-2.49955	4.01413	3.78603	24155	29	1245	6	0.481928	0.196272	2335|4690|6591|8828|8829|9353	FN1|NCK1|SNAI2|NRP2|NRP1|SLIT2	-0.728144	0	60	0	0	-2.89862	11.641
1	-2.49847	GO:0014032	M1	1	0	GO Biological Processes	19	neural crest cell development	-2.49847	2.60265	3.38882	24155	82	1245	11	0.883534	0.265216	182|1909|2335|3084|3091|6591|8828|8829|9839|10016|23603	JAG1|EDNRA|FN1|NRG1|HIF1A|SNAI2|NRP2|NRP1|ZEB2|PDCD6|CORO1C	-0.728144	0	60	0	0	-2.89862	11.641
1	-2.5091	GO:0060322	M1	1	0	GO Biological Processes	19	head development	-2.5091	1.44825	2.96072	24155	777	1245	58	4.65863	0.59729	522|1281|1282|1385|1398|1436|1901|1909|2009|2048|2113|2932|3084|3091|3624|4035|4155|4323|5048|5156|5469|5781|6259|6546|6586|6867|7707|8455|8516|8633|8828|8829|9095|9353|9839|10000|22803|25976|27089|50944|51199|51506|54510|55773|57045|59345|79641|79934|79969|80264|80279|84002|84197|91584|113246|200894|339451|386724	ATP5PF|COL3A1|COL4A1|CREB1|CRK|CSF1R|S1PR1|EDNRA|EML1|EPHB2|ETS1|GSK3B|NRG1|HIF1A|INHBA|LRP1|MBP|MMP14|PAFAH1B1|PDGFRA|MED1|PTPN11|RYK|SLC8A1|SLIT3|TACC1|ZNF148|ATRN|ITGA8|UNC5C|NRP2|NRP1|TBX19|SLIT2|ZEB2|AKT3|XRN2|TIPARP|UQCRQ|SHANK1|NIN|UFC1|PCDH18|TBC1D23|TWSG1|GNB4|ROGDI|COQ8B|ATAT1|ZNF430|CDK5RAP3|B3GNT5|POMK|PLXNA4|C12orf57|ARL13B|KLHL17|AMIGO3	-0.728144	0	62	0	0	-2.83841	1.91715
1	-2.50861	GO:0030856	M1	1	0	GO Biological Processes	19	regulation of epithelial cell differentiation	-2.50861	2.10081	3.22583	24155	157	1245	17	1.36546	0.328904	182|857|1903|2932|4659|5054|5469|6093|6935|7716|8609|9839|10413|55897|81575|126695|135228	JAG1|CAV1|S1PR3|GSK3B|PPP1R12A|SERPINE1|MED1|ROCK1|ZEB1|VEZF1|KLF7|ZEB2|YAP1|MESP1|APOLD1|KDF1|CD109	-0.728144	0	68	0	0	-2.72588	3.01803
1	-2.49955	GO:0044550	M1	1	0	GO Biological Processes	19	secondary metabolite biosynthetic process	-2.49955	4.01413	3.78603	24155	29	1245	6	0.481928	0.196272	1652|4357|4644|7220|9839|26060	DDT|MPST|MYO5A|TRPC1|ZEB2|APPL1	-0.728144	0	82	1	1	-2.49955	4.61943
1	-2.49428	GO:0006029	M1	1	0	GO Biological Processes	19	proteoglycan metabolic process	-2.49428	2.4768	3.34423	24155	94	1245	12	0.963855	0.276897	1464|2132|3340|3373|9469|9953|22856|29940|51363|55454|79690|81792	CSPG4|EXT2|NDST1|HYAL1|CHST3|HS3ST3B1|CHSY1|DSE|CHST15|CSGALNACT2|GAL3ST4|ADAMTS12	-0.726676	0	33	0	0	-3.78704	4.47729
1	-2.48762	GO:0045055	M1	1	0	GO Biological Processes	19	regulated exocytosis	-2.48762	1.43987	2.93992	24155	795	1245	59	4.73896	0.602163	87|102|960|2162|2212|2241|2335|2357|2358|2683|2932|3312|3482|3685|3690|4627|4718|5028|5054|5294|5478|5660|5708|5724|5878|5912|6093|6678|7057|7077|7094|7879|8635|8694|8832|10097|10312|10450|11031|11322|22918|23191|23200|23317|25837|25852|28956|51368|51552|53916|53917|79169|83858|135228|139322|158747|196527|374354|374395	ACTN1|ADAM10|CD44|F13A1|FCGR2A|FER|FN1|FPR1|FPR2|B4GALT1|GSK3B|HSPA8|IGF2R|ITGAV|ITGB3|MYH9|NDUFC2|P2RY1|SERPINE1|PIK3CG|PPIA|PSAP|PSMD2|PTAFR|RAB5C|RAP2B|ROCK1|SPARC|THBS1|TIMP2|TLN1|RAB7A|RNASET2|DGAT1|CD84|ACTR2|TCIRG1|PPIE|RAB31|TMC6|CD93|CYFIP1|ATP11B|DNAJC13|RAB26|ARMC8|LAMTOR2|TEX264|RAB14|RAB4B|RAB24|C1orf35|ATAD3B|CD109|APOOL|MOSPD2|ANO6|NHLRC2|TMEM179B	-0.721617	0	38	0	0	-3.48878	1.68101
1	-2.46892	GO:0001935	M1	1	0	GO Biological Processes	19	endothelial cell proliferation	-2.46892	1.94991	3.13667	24155	199	1245	20	1.60643	0.356311	857|1739|2081|2321|3091|3676|3690|4323|5291|6678|6774|6868|7010|7057|8828|8829|10000|10016|57608|93974	CAV1|DLG1|ERN1|FLT1|HIF1A|ITGA4|ITGB3|MMP14|PIK3CB|SPARC|STAT3|ADAM17|TEK|THBS1|NRP2|NRP1|AKT3|PDCD6|JCAD|ATP5IF1	-0.720191	0	1	0	0	-8.54717	2.5568
1	-2.46138	GO:0045785	M1	1	0	GO Biological Processes	19	positive regulation of cell adhesion	-2.46138	1.63686	3.00548	24155	403	1245	34	2.73092	0.46191	857|960|1398|1842|1948|2113|2335|2932|3373|3559|3575|3676|3685|3717|4690|4811|5062|5290|5295|5420|5724|5781|6093|7010|8754|8829|9530|10085|10519|29126|30835|79812|114548|151887	CAV1|CD44|CRK|ECM2|EFNB2|ETS1|FN1|GSK3B|HYAL1|IL2RA|IL7R|ITGA4|ITGAV|JAK2|NCK1|NID1|PAK2|PIK3CA|PIK3R1|PODXL|PTAFR|PTPN11|ROCK1|TEK|ADAM9|NRP1|BAG4|EDIL3|CIB1|CD274|CD209|MMRN2|NLRP3|CCDC80	-0.720191	0	3	0	0	-7.12019	2.74713
1	-2.46224	GO:0006091	M1	1	0	GO Biological Processes	19	generation of precursor metabolites and energy	-2.46224	1.54918	2.96859	24155	526	1245	42	3.37349	0.511686	37|509|516|517|521|522|539|1350|2230|2932|3091|3098|4695|4700|4716|4718|4725|4728|4729|4731|4928|5261|5290|6774|7264|8086|9821|10327|10476|10632|11315|23410|26137|27089|29796|56181|57017|93058|93974|153743|441531|728294	ACADVL|ATP5F1C|ATP5MC1|ATP5MC2|ATP5ME|ATP5PF|ATP5PO|COX7C|FDX1|GSK3B|HIF1A|HK1|NDUFA2|NDUFA6|NDUFB10|NDUFC2|NDUFS5|NDUFS8|NDUFV2|NDUFV3|NUP98|PHKG2|PIK3CA|STAT3|TSTA3|AAAS|RB1CC1|AKR1A1|ATP5PD|ATP5MG|PARK7|SIRT3|ZBTB20|UQCRQ|UQCR10|MTFR1L|COQ9|COQ10A|ATP5IF1|PPP1R2B|PGAM4|D2HGDH	-0.720191	0	9	0	0	-5.12475	3.52756
1	-2.46704	GO:0051258	M1	1	0	GO Biological Processes	19	protein polymerization	-2.46704	1.7762	3.06737	24155	284	1245	26	2.08835	0.405261	382|1739|2241|2764|3717|4131|4690|4976|5987|6711|9113|9353|9530|10097|10787|22921|23116|23191|51199|79778|80206|84501|89795|93663|157922|374666	ARF6|DLG1|FER|GMFB|JAK2|MAP1B|NCK1|OPA1|TRIM27|SPTBN1|LATS1|SLIT2|BAG4|ACTR2|NCKAP1|MSRB2|TOGARAM1|CYFIP1|NIN|MICALL2|FHOD3|SPIRE2|NAV3|ARHGAP18|CAMSAP1|WASH3P	-0.720191	0	16	0	0	-4.67817	3.2336
1	-2.46485	GO:0030204	M1	1	0	GO Biological Processes	19	chondroitin sulfate metabolic process	-2.46485	3.48234	3.61666	24155	39	1245	7	0.562249	0.211912	1464|3373|9469|22856|29940|51363|55454	CSPG4|HYAL1|CHST3|CHSY1|DSE|CHST15|CSGALNACT2	-0.720191	0	33	0	0	-3.78704	4.47729
1	-2.46472	GO:0016197	M1	1	0	GO Biological Processes	19	endosomal transport	-2.46472	1.88033	3.10651	24155	227	1245	22	1.76707	0.373397	19|382|5987|7879|9827|10123|11149|22853|23023|23085|23258|23527|23603|26088|30845|51160|51552|55773|57589|79778|163486|374666	ABCA1|ARF6|TRIM27|RAB7A|RGP1|ARL4C|BVES|LMTK2|TMCC1|ERC1|DENND5A|ACAP2|CORO1C|GGA1|EHD3|VPS28|RAB14|TBC1D23|RIC1|MICALL2|DENND1B|WASH3P	-0.720191	0	42	0	0	-3.38584	3.88032
1	-2.46485	GO:0010761	M1	1	0	GO Biological Processes	19	fibroblast migration	-2.46485	3.48234	3.61666	24155	39	1245	7	0.562249	0.211912	2241|4921|6546|7057|9530|23603|26060	FER|DDR2|SLC8A1|THBS1|BAG4|CORO1C|APPL1	-0.720191	0	51	0	0	-3.07606	5.96973
1	-2.4619	GO:0010763	M1	1	0	GO Biological Processes	19	positive regulation of fibroblast migration	-2.4619	5.96973	4.17815	24155	13	1245	4	0.321285	0.160384	4921|6546|7057|9530	DDR2|SLC8A1|THBS1|BAG4	-0.720191	0	51	0	0	-3.07606	5.96973
1	-2.46715	GO:0034329	M1	1	0	GO Biological Processes	19	cell junction assembly	-2.46715	1.85161	3.09733	24155	241	1245	23	1.84739	0.381633	87|857|1009|1636|1739|2335|4035|4323|5796|6093|6591|6801|7010|7057|7094|8829|10052|10979|23603|50855|57493|79778|92140	ACTN1|CAV1|CDH11|ACE|DLG1|FN1|LRP1|MMP14|PTPRK|ROCK1|SNAI2|STRN|TEK|THBS1|TLN1|NRP1|GJC1|FERMT2|CORO1C|PARD6A|HEG1|MICALL2|MTDH	-0.720191	0	53	0	0	-3.05732	5.06129
1	-2.4619	GO:1902285	M1	1	0	GO Biological Processes	19	semaphorin-plexin signaling pathway involved in neuron projection guidance	-2.4619	5.96973	4.17815	24155	13	1245	4	0.321285	0.160384	8828|8829|10154|91584	NRP2|NRP1|PLXNC1|PLXNA4	-0.720191	0	60	0	0	-2.89862	11.641
1	-2.4619	GO:0001845	M1	1	0	GO Biological Processes	19	phagolysosome assembly	-2.4619	5.96973	4.17815	24155	13	1245	4	0.321285	0.160384	7879|8406|51552|84286	RAB7A|SRPX|RAB14|TMEM175	-0.720191	0	65	0	0	-2.78407	5.96973
1	-2.48368	GO:0045446	M1	1	0	GO Biological Processes	19	endothelial cell differentiation	-2.48368	2.28254	3.26949	24155	119	1245	14	1.1245	0.29884	182|1901|1903|3084|4659|5912|6093|6935|7716|8829|51735|55897|57493|81575	JAG1|S1PR1|S1PR3|NRG1|PPP1R12A|RAP2B|ROCK1|ZEB1|VEZF1|NRP1|RAPGEF6|MESP1|HEG1|APOLD1	-0.720191	0	68	0	0	-2.72588	3.01803
1	-2.47555	GO:0042177	M1	1	0	GO Biological Processes	19	negative regulation of protein catabolic process	-2.47555	2.20473	3.23541	24155	132	1245	15	1.20482	0.309203	3084|4194|6093|6135|6625|7077|7327|9827|11315|28996|29934|51035|57589|80011|80279	NRG1|MDM4|ROCK1|RPL11|SNRNP70|TIMP2|UBE2G2|RGP1|PARK7|HIPK2|SNX12|UBXN1|RIC1|FAM192A|CDK5RAP3	-0.720191	0	83	1	1	-2.47555	2.20473
1	-2.47121	GO:0006397	M1	1	0	GO Biological Processes	19	mRNA processing	-2.47121	1.54209	2.97269	24155	541	1245	43	3.45382	0.517526	580|904|984|2081|2967|3312|4928|6429|6625|6733|7307|8996|9444|10450|11066|22803|22889|23064|26097|29101|29896|51163|51319|51747|51755|54439|54496|54960|54998|55692|55796|56254|57461|58490|64852|79228|79706|80336|84967|151987|170506|404672|100130932	BARD1|CCNT1|CDK11B|ERN1|GTF2H3|HSPA8|NUP98|SRSF4|SNRNP70|SRPK2|U2AF1|NOL3|QKI|PPIE|SNRNP35|XRN2|KHDC4|SETX|CHTOP|SSU72|TRA2A|DBR1|RSRC1|LUC7L3|CDK12|RBM27|PRMT7|GEMIN8|AURKAIP1|LUC7L|MBNL3|RNF20|ISY1|RPRD1B|TUT1|THOC6|PRKRIP1|PABPC1L|LSM10|PPP4R2|DHX36|GTF2H5|SNRPGP15	-0.720191	0	84	1	1	-2.47121	2.37571
1	-2.46485	GO:1901998	M1	1	0	GO Biological Processes	19	toxin transport	-2.46485	3.48234	3.61666	24155	39	1245	7	0.562249	0.211912	3274|8829|9276|26088|29126|55192|84168	HRH2|NRP1|COPB2|GGA1|CD274|DNAJC17|ANTXR1	-0.720191	0	85	1	1	-2.46485	3.48234
1	-2.4619	GO:0098903	M1	1	0	GO Biological Processes	19	regulation of membrane repolarization during action potential	-2.4619	5.96973	4.17815	24155	13	1245	4	0.321285	0.160384	781|857|1739|388591	CACNA2D1|CAV1|DLG1|RNF207	-0.720191	0	86	1	1	-2.4619	5.96973
1	-2.45222	GO:0009259	M1	1	0	GO Biological Processes	19	ribonucleotide metabolic process	-2.45222	1.52988	2.95209	24155	558	1245	44	3.53414	0.523292	509|516|517|521|522|523|539|1350|1739|2977|3091|3098|3312|4695|4700|4716|4718|4725|4728|4729|4731|4832|4928|4976|6774|6818|8086|8694|9524|10476|10632|11315|26137|27089|29796|51715|57017|60490|79646|79717|93974|131870|374659|441531	ATP5F1C|ATP5MC1|ATP5MC2|ATP5ME|ATP5PF|ATP6V1A|ATP5PO|COX7C|DLG1|GUCY1A2|HIF1A|HK1|HSPA8|NDUFA2|NDUFA6|NDUFB10|NDUFC2|NDUFS5|NDUFS8|NDUFV2|NDUFV3|NME3|NUP98|OPA1|STAT3|SULT1A3|AAAS|DGAT1|TECR|ATP5PD|ATP5MG|PARK7|ZBTB20|UQCRQ|UQCR10|RAB23|COQ9|PPCDC|PANK3|PPCS|ATP5IF1|NUDT16|HDDC3|PGAM4	-0.712775	0	9	0	0	-5.12475	3.52756
1	-2.45095	GO:0043010	M1	1	0	GO Biological Processes	19	camera-type eye development	-2.45095	1.73008	3.03556	24155	314	1245	28	2.249	0.420214	182|1282|1427|1739|2048|2200|3091|3299|3624|4124|4976|5156|5159|5469|6498|6935|7528|8829|9839|10312|22803|23093|28996|57045|57381|91355|113246|131544	JAG1|COL4A1|CRYGS|DLG1|EPHB2|FBN1|HIF1A|HSF4|INHBA|MAN2A1|OPA1|PDGFRA|PDGFRB|MED1|SKIL|ZEB1|YY1|NRP1|ZEB2|TCIRG1|XRN2|TTLL5|HIPK2|TWSG1|RHOJ|LRP5L|C12orf57|CRYBG3	-0.712775	0	12	0	0	-4.93161	7.9889
1	-2.43481	GO:0006622	M1	1	0	GO Biological Processes	19	protein targeting to lysosome	-2.43481	4.61943	3.86814	24155	21	1245	5	0.401606	0.179243	3312|7879|8031|79158|374666	HSPA8|RAB7A|NCOA4|GNPTAB|WASH3P	-0.701099	0	58	0	0	-2.9231	4.61943
1	-2.43481	GO:0036344	M1	1	0	GO Biological Processes	19	platelet morphogenesis	-2.43481	4.61943	3.86814	24155	21	1245	5	0.401606	0.179243	87|842|4627|5781|10519	ACTN1|CASP9|MYH9|PTPN11|CIB1	-0.701099	0	81	0	0	-2.5343	4.8504
1	-2.43481	GO:0042438	M1	1	0	GO Biological Processes	19	melanin biosynthetic process	-2.43481	4.61943	3.86814	24155	21	1245	5	0.401606	0.179243	1652|4644|7220|9839|26060	DDT|MYO5A|TRPC1|ZEB2|APPL1	-0.701099	0	82	0	0	-2.49955	4.61943
1	-2.42784	GO:0043547	M1	1	0	GO Biological Processes	19	positive regulation of GTPase activity	-2.42784	1.62878	2.97481	24155	405	1245	34	2.73092	0.46191	141|394|1398|1901|2149|2932|3993|5910|5922|8829|9462|9754|9827|10484|10641|23158|23527|23603|26037|27237|27352|50807|51735|57139|57186|57584|57589|93663|119016|134957|139818|163486|414059|414189	ADPRH|ARHGAP5|CRK|S1PR1|F2R|GSK3B|LLGL2|RAP1GDS1|RASA2|NRP1|RASAL2|STARD8|RGP1|SEC23A|NPRL2|TBC1D9|ACAP2|CORO1C|SIPA1L1|ARHGEF16|SGSM3|ASAP1|RAPGEF6|RGL3|RALGAPA2|ARHGAP21|RIC1|ARHGAP18|AGAP4|STXBP5|DOCK11|DENND1B|TBC1D3B|AGAP6	-0.695615	0	31	0	0	-3.90834	1.66068
1	-2.42104	GO:0001706	M1	1	0	GO Biological Processes	19	endoderm formation	-2.42104	3.10426	3.47214	24155	50	1245	8	0.64257	0.226452	2335|3624|3676|3685|3693|4323|4324|55897	FN1|INHBA|ITGA4|ITGAV|ITGB5|MMP14|MMP15|MESP1	-0.69322	0	71	0	0	-2.71881	3.44917
1	-2.42104	GO:0001961	M1	1	0	GO Biological Processes	19	positive regulation of cytokine-mediated signaling pathway	-2.42104	3.10426	3.47214	24155	50	1245	8	0.64257	0.226452	3091|3661|3665|5048|5469|6868|22954|54765	HIF1A|IRF3|IRF7|PAFAH1B1|MED1|ADAM17|TRIM32|TRIM44	-0.69322	0	75	0	0	-2.61953	3.10426
1	-2.42104	GO:0097035	M1	1	0	GO Biological Processes	19	regulation of membrane lipid distribution	-2.42104	3.10426	3.47214	24155	50	1245	8	0.64257	0.226452	19|10347|23200|55113|57205|64801|196527|286410	ABCA1|ABCA7|ATP11B|XKR8|ATP10D|ARV1|ANO6|ATP11C	-0.69322	0	87	1	1	-2.42104	3.88032
1	-2.41763	GO:0045732	M1	1	0	GO Biological Processes	19	positive regulation of protein catabolic process	-2.41763	1.89504	3.07303	24155	215	1245	21	1.68675	0.364961	580|857|2932|3949|4035|7879|8754|10134|22954|25807|25976|26088|27352|51160|54467|64750|79016|80279|83737|93974|160418	BARD1|CAV1|GSK3B|LDLR|LRP1|RAB7A|ADAM9|BCAP31|TRIM32|RHBDD3|TIPARP|GGA1|SGSM3|VPS28|ANKIB1|SMURF2|DDA1|CDK5RAP3|ITCH|ATP5IF1|TMTC3	-0.692617	0	25	0	0	-4.08238	1.93507
1	-2.41752	GO:0001704	M1	1	0	GO Biological Processes	19	formation of primary germ layer	-2.41752	2.24481	3.20001	24155	121	1245	14	1.1245	0.29884	2132|2335|3624|3676|3685|3690|3693|4323|4324|8324|8516|9095|55897|57045	EXT2|FN1|INHBA|ITGA4|ITGAV|ITGB3|ITGB5|MMP14|MMP15|FZD7|ITGA8|TBX19|MESP1|TWSG1	-0.692617	0	71	0	0	-2.71881	3.44917
1	-2.41461	GO:0010638	M1	1	0	GO Biological Processes	19	positive regulation of organelle organization	-2.41461	1.49243	2.90526	24155	624	1245	48	3.85542	0.545649	382|545|1739|2241|2764|2932|3091|4131|4690|4976|5159|5599|5899|5987|6591|7010|7529|7755|8829|9252|9530|10097|10146|10787|11315|23116|23191|25923|25970|26097|49856|50807|51199|54543|55183|55729|56254|79008|79778|80856|84501|89795|92345|93974|94104|118424|170506|374666	ARF6|ATR|DLG1|FER|GMFB|GSK3B|HIF1A|MAP1B|NCK1|OPA1|PDGFRB|MAPK8|RALB|TRIM27|SNAI2|TEK|YWHAB|ZNF205|NRP1|RPS6KA5|BAG4|ACTR2|G3BP1|NCKAP1|PARK7|TOGARAM1|CYFIP1|ATL3|SH2B1|CHTOP|WRAP73|ASAP1|NIN|TOMM7|RIF1|ATF7IP|RNF20|SLX1B|MICALL2|LNPK|SPIRE2|NAV3|NAF1|ATP5IF1|PAXBP1|UBE2J2|DHX36|WASH3P	-0.691732	0	16	0	0	-4.67817	3.2336
1	-2.41374	GO:0043632	M1	1	0	GO Biological Processes	19	modification-dependent macromolecule catabolic process	-2.41374	1.48544	2.90145	24155	640	1245	49	3.93574	0.551074	550|857|2932|5708|6135|6400|6478|7327|7328|9113|9320|9690|10134|11101|11315|11342|22954|25852|25906|26233|27246|28996|51035|51160|54467|55139|55336|56254|57563|64682|64750|79016|79176|79718|80279|83737|83892|84640|84993|90864|91544|93611|118424|130617|151636|158880|165918|219333|253980	AUP1|CAV1|GSK3B|PSMD2|RPL11|SEL1L|SIAH2|UBE2G2|UBE2H|LATS1|TRIP12|UBE3C|BCAP31|ATE1|PARK7|RNF13|TRIM32|ARMC8|ANAPC15|FBXL6|RNF115|HIPK2|UBXN1|VPS28|ANKIB1|ANKZF1|FBXL8|RNF20|KLHL8|ANAPC1|SMURF2|DDA1|FBXL15|TBL1XR1|CDK5RAP3|ITCH|KCTD10|USP38|UBL7|SPSB3|UBXN11|FBXO44|UBE2J2|ZFAND2B|DTX3L|USP51|RNF168|USP12|KCTD13	-0.691732	0	39	0	0	-3.40714	1.7524
1	-2.41122	GO:2001233	M1	1	0	GO Biological Processes	19	regulation of apoptotic signaling pathway	-2.41122	1.62477	2.95954	24155	406	1245	34	2.73092	0.46191	367|857|960|2140|2932|3091|3624|3685|3717|4690|4976|5054|5062|5599|5883|6135|6478|6498|6591|7057|7529|7755|8406|8797|8829|8996|9821|10134|10413|10955|11315|22954|80237|93974	AR|CAV1|CD44|EYA3|GSK3B|HIF1A|INHBA|ITGAV|JAK2|NCK1|OPA1|SERPINE1|PAK2|MAPK8|RAD9A|RPL11|SIAH2|SKIL|SNAI2|THBS1|YWHAB|ZNF205|SRPX|TNFRSF10A|NRP1|NOL3|RB1CC1|BCAP31|YAP1|SERINC3|PARK7|TRIM32|ELL3|ATP5IF1	-0.690653	0	34	0	0	-3.61525	2.4252
1	-2.39328	GO:0019693	M1	1	0	GO Biological Processes	19	ribose phosphate metabolic process	-2.39328	1.51051	2.89592	24155	578	1245	45	3.61446	0.528984	509|516|517|521|522|523|539|1350|1739|2977|3091|3098|3312|4695|4700|4716|4718|4725|4728|4729|4731|4832|4928|4976|6774|6818|8086|8694|9524|10476|10632|11315|25796|26137|27089|29796|51715|57017|60490|79646|79717|93974|131870|374659|441531	ATP5F1C|ATP5MC1|ATP5MC2|ATP5ME|ATP5PF|ATP6V1A|ATP5PO|COX7C|DLG1|GUCY1A2|HIF1A|HK1|HSPA8|NDUFA2|NDUFA6|NDUFB10|NDUFC2|NDUFS5|NDUFS8|NDUFV2|NDUFV3|NME3|NUP98|OPA1|STAT3|SULT1A3|AAAS|DGAT1|TECR|ATP5PD|ATP5MG|PARK7|PGLS|ZBTB20|UQCRQ|UQCR10|RAB23|COQ9|PPCDC|PANK3|PPCS|ATP5IF1|NUDT16|HDDC3|PGAM4	-0.683244	0	9	0	0	-5.12475	3.52756
1	-2.38828	GO:0097435	M1	1	0	GO Biological Processes	19	supramolecular fiber organization	-2.38828	1.46807	2.87311	24155	674	1245	51	4.09639	0.561737	87|382|1281|1739|1901|2241|2764|3312|3693|3717|3796|3949|4015|4131|4690|4921|5048|5074|5156|5159|5295|5987|6093|6711|8829|9113|9353|9509|9530|10097|10519|10787|11315|22921|23116|23191|23603|30011|50944|51199|57381|57551|79778|80206|84056|84501|89795|93663|157922|253980|374666	ACTN1|ARF6|COL3A1|DLG1|S1PR1|FER|GMFB|HSPA8|ITGB5|JAK2|KIF2A|LDLR|LOX|MAP1B|NCK1|DDR2|PAFAH1B1|PAWR|PDGFRA|PDGFRB|PIK3R1|TRIM27|ROCK1|SPTBN1|NRP1|LATS1|SLIT2|ADAMTS2|BAG4|ACTR2|CIB1|NCKAP1|PARK7|MSRB2|TOGARAM1|CYFIP1|CORO1C|SH3KBP1|SHANK1|NIN|RHOJ|TAOK1|MICALL2|FHOD3|KATNAL1|SPIRE2|NAV3|ARHGAP18|CAMSAP1|KCTD13|WASH3P	-0.683244	0	16	0	0	-4.67817	3.2336
1	-2.38849	GO:0150094	M1	1	0	GO Biological Processes	19	amyloid-beta clearance by cellular catabolic process	-2.38849	8.31497	4.5122	24155	7	1245	3	0.240964	0.138953	3949|4035|10347	LDLR|LRP1|ABCA7	-0.683244	0	43	0	0	-3.38096	9.7008
1	-2.38849	GO:1900223	M1	1	0	GO Biological Processes	19	positive regulation of amyloid-beta clearance	-2.38849	8.31497	4.5122	24155	7	1245	3	0.240964	0.138953	4035|6093|10347	LRP1|ROCK1|ABCA7	-0.683244	0	43	0	0	-3.38096	9.7008
1	-2.38849	GO:2000210	M1	1	0	GO Biological Processes	19	positive regulation of anoikis	-2.38849	8.31497	4.5122	24155	7	1245	3	0.240964	0.138953	166|25855|51651	TLE5|BRMS1|PTRH2	-0.683244	0	56	0	0	-2.95158	8.31497
1	-2.38849	GO:0070100	M1	1	0	GO Biological Processes	19	negative regulation of chemokine-mediated signaling pathway	-2.38849	8.31497	4.5122	24155	7	1245	3	0.240964	0.138953	6586|9353|10019	SLIT3|SLIT2|SH2B3	-0.683244	0	57	0	0	-2.94001	11.641
1	-2.38849	GO:1990791	M1	1	0	GO Biological Processes	19	dorsal root ganglion development	-2.38849	8.31497	4.5122	24155	7	1245	3	0.240964	0.138953	8633|8828|8829	UNC5C|NRP2|NRP1	-0.683244	0	60	0	0	-2.89862	11.641
1	-2.38849	GO:0061438	M1	1	0	GO Biological Processes	19	renal system vasculature morphogenesis	-2.38849	8.31497	4.5122	24155	7	1245	3	0.240964	0.138953	5156|5159|8829	PDGFRA|PDGFRB|NRP1	-0.683244	0	64	0	0	-2.78407	8.31497
1	-2.38849	GO:0061439	M1	1	0	GO Biological Processes	19	kidney vasculature morphogenesis	-2.38849	8.31497	4.5122	24155	7	1245	3	0.240964	0.138953	5156|5159|8829	PDGFRA|PDGFRB|NRP1	-0.683244	0	64	0	0	-2.78407	8.31497
1	-2.38849	GO:1900227	M1	1	0	GO Biological Processes	19	positive regulation of NLRP3 inflammasome complex assembly	-2.38849	8.31497	4.5122	24155	7	1245	3	0.240964	0.138953	7099|56919|79969	TLR4|DHX33|ATAT1	-0.683244	0	88	1	1	-2.38849	8.31497
1	-2.38849	GO:1904781	M1	1	0	GO Biological Processes	19	positive regulation of protein localization to centrosome	-2.38849	8.31497	4.5122	24155	7	1245	3	0.240964	0.138953	636|2932|50855	BICD1|GSK3B|PARD6A	-0.683244	0	89	1	1	-2.38849	8.31497
1	-2.38134	GO:0007044	M1	1	0	GO Biological Processes	19	cell-substrate junction assembly	-2.38134	2.4002	3.22116	24155	97	1245	12	0.963855	0.276897	87|2335|4035|4323|5796|6093|7010|7057|7094|8829|10979|23603	ACTN1|FN1|LRP1|MMP14|PTPRK|ROCK1|TEK|THBS1|TLN1|NRP1|FERMT2|CORO1C	-0.677693	0	53	0	0	-3.05732	5.06129
1	-2.36859	GO:0030833	M1	1	0	GO Biological Processes	19	regulation of actin filament polymerization	-2.36859	2.03597	3.08411	24155	162	1245	17	1.36546	0.328904	382|1739|2241|2764|4690|5987|6711|9113|9353|9530|10097|10787|23191|80206|84501|93663|374666	ARF6|DLG1|FER|GMFB|NCK1|TRIM27|SPTBN1|LATS1|SLIT2|BAG4|ACTR2|NCKAP1|CYFIP1|FHOD3|SPIRE2|ARHGAP18|WASH3P	-0.667702	0	16	0	0	-4.67817	3.2336
1	-2.36859	GO:0140053	M1	1	0	GO Biological Processes	19	mitochondrial gene expression	-2.36859	2.03597	3.08411	24155	162	1245	17	1.36546	0.328904	6150|28958|51069|54998|55052|63899|64951|64960|64976|64983|65993|80298|85476|92170|118487|128308|219402	MRPL23|COA3|MRPL2|AURKAIP1|MRPL20|NSUN3|MRPS24|MRPS15|MRPL40|MRPL32|MRPS34|MTERF2|GFM1|MTG1|CHCHD1|MRPL55|MTIF3	-0.667702	0	24	0	0	-4.09469	2.61595
1	-2.36551	GO:0043406	M1	1	0	GO Biological Processes	19	positive regulation of MAP kinase activity	-2.36551	1.79092	2.98904	24155	260	1245	24	1.92771	0.389681	1398|1464|2081|2149|2246|2321|2357|3084|3672|3717|5159|5291|5294|5781|7057|7099|8754|8792|9839|10746|11183|23118|28956|57551	CRK|CSPG4|ERN1|F2R|FGF1|FLT1|FPR1|NRG1|ITGA1|JAK2|PDGFRB|PIK3CB|PIK3CG|PTPN11|THBS1|TLR4|ADAM9|TNFRSF11A|ZEB2|MAP3K2|MAP4K5|TAB2|LAMTOR2|TAOK1	-0.665992	0	20	0	0	-4.49707	1.86442
1	-2.34723	GO:0007266	M1	1	0	GO Biological Processes	19	Rho protein signal transduction	-2.34723	1.90212	3.01636	24155	204	1245	20	1.60643	0.356311	19|394|1281|2149|5159|5924|6093|6242|6655|7204|8829|10256|10672|27237|57381|57493|83892|89941|152273|253980	ABCA1|ARHGAP5|COL3A1|F2R|PDGFRB|RASGRF2|ROCK1|RTKN|SOS2|TRIO|NRP1|CNKSR1|GNA13|ARHGEF16|RHOJ|HEG1|KCTD10|RHOT2|FGD5|KCTD13	-0.65316	0	13	0	0	-4.84468	1.90212
1	-2.34732	GO:2000781	M1	1	0	GO Biological Processes	19	positive regulation of double-strand break repair	-2.34732	3.75515	3.57823	24155	31	1245	6	0.481928	0.196272	10097|51149|55183|84501|131870|151636	ACTR2|MRNIP|RIF1|SPIRE2|NUDT16|DTX3L	-0.65316	0	30	0	0	-3.92727	4.8504
1	-2.34732	GO:0050650	M1	1	0	GO Biological Processes	19	chondroitin sulfate proteoglycan biosynthetic process	-2.34732	3.75515	3.57823	24155	31	1245	6	0.481928	0.196272	1464|9469|22856|29940|51363|55454	CSPG4|CHST3|CHSY1|DSE|CHST15|CSGALNACT2	-0.65316	0	33	0	0	-3.78704	4.47729
1	-2.34822	GO:0016049	M1	1	0	GO Biological Processes	19	cell growth	-2.34822	1.55372	2.87768	24155	487	1245	39	3.13253	0.493687	102|984|1981|1982|2335|2932|3373|3624|3676|4035|4131|4241|4323|5048|6259|6586|6868|7528|8828|8829|9353|9792|9839|10519|10591|10631|22850|22954|23191|28956|51199|51320|51447|83737|91584|118813|131566|221927|400410	ADAM10|CDK11B|EIF4G1|EIF4G2|FN1|GSK3B|HYAL1|INHBA|ITGA4|LRP1|MAP1B|MELTF|MMP14|PAFAH1B1|RYK|SLIT3|ADAM17|YY1|NRP2|NRP1|SLIT2|SERTAD2|ZEB2|CIB1|DNPH1|POSTN|ADNP2|TRIM32|CYFIP1|LAMTOR2|NIN|MEX3C|IP6K2|ITCH|PLXNA4|ZFYVE27|DCBLD2|BRAT1|ST20	-0.65316	0	40	0	0	-3.40307	3.1584
1	-2.34494	GO:0031124	M1	1	0	GO Biological Processes	19	mRNA 3'-end processing	-2.34494	2.37571	3.18116	24155	98	1245	12	0.963855	0.276897	580|904|6429|7307|26097|29101|56254|58490|64852|79228|80336|170506	BARD1|CCNT1|SRSF4|U2AF1|CHTOP|SSU72|RNF20|RPRD1B|TUT1|THOC6|PABPC1L|DHX36	-0.65222	0	84	0	0	-2.47121	2.37571
1	-2.34141	GO:0006582	M1	1	0	GO Biological Processes	19	melanin metabolic process	-2.34141	4.40946	3.72956	24155	22	1245	5	0.401606	0.179243	1652|4644|7220|9839|26060	DDT|MYO5A|TRPC1|ZEB2|APPL1	-0.651381	0	82	0	0	-2.49955	4.61943
1	-2.34141	GO:0043496	M1	1	0	GO Biological Processes	19	regulation of protein homodimerization activity	-2.34141	4.40946	3.72956	24155	22	1245	5	0.401606	0.179243	382|3084|3676|9618|11315	ARF6|NRG1|ITGA4|TRAF4|PARK7	-0.651381	0	90	1	1	-2.34141	4.40946
1	-2.33613	GO:0048872	M1	1	0	GO Biological Processes	19	homeostasis of number of cells	-2.33613	1.80663	2.97041	24155	247	1245	23	1.84739	0.381633	2113|2149|3091|3559|3575|3624|3717|5291|5469|5781|6498|6774|6868|9258|10000|10019|10312|28996|54542|54681|93974|129138|139818	ETS1|F2R|HIF1A|IL2RA|IL7R|INHBA|JAK2|PIK3CB|MED1|PTPN11|SKIL|STAT3|ADAM17|MFHAS1|AKT3|SH2B3|TCIRG1|HIPK2|RC3H2|P4HTM|ATP5IF1|ANKRD54|DOCK11	-0.650098	0	55	0	0	-2.99215	3.6378
1	-2.337	GO:0014031	M1	1	0	GO Biological Processes	19	mesenchymal cell development	-2.337	2.4816	3.20862	24155	86	1245	11	0.883534	0.265216	182|1909|2335|3084|3091|6591|8828|8829|9839|10016|23603	JAG1|EDNRA|FN1|NRG1|HIF1A|SNAI2|NRP2|NRP1|ZEB2|PDCD6|CORO1C	-0.650098	0	60	0	0	-2.89862	11.641
1	-2.337	GO:0048864	M1	1	0	GO Biological Processes	19	stem cell development	-2.337	2.4816	3.20862	24155	86	1245	11	0.883534	0.265216	182|1909|2335|3084|3091|6591|8828|8829|9839|10016|23603	JAG1|EDNRA|FN1|NRG1|HIF1A|SNAI2|NRP2|NRP1|ZEB2|PDCD6|CORO1C	-0.650098	0	60	0	0	-2.89862	11.641
1	-2.3337	GO:0051917	M1	1	0	GO Biological Processes	19	regulation of fibrinolysis	-2.3337	5.54332	3.96393	24155	14	1245	4	0.321285	0.160384	5054|7056|7057|7391	SERPINE1|THBD|THBS1|USF1	-0.648999	0	35	0	0	-3.57985	7.76064
1	-2.32758	GO:0034330	M1	1	0	GO Biological Processes	19	cell junction organization	-2.32758	1.73348	2.93446	24155	291	1245	26	2.08835	0.405261	87|382|857|1009|1436|1636|1739|2149|2335|4035|4323|5796|6093|6591|6801|7010|7057|7094|8829|10052|10979|23603|50855|57493|79778|92140	ACTN1|ARF6|CAV1|CDH11|CSF1R|ACE|DLG1|F2R|FN1|LRP1|MMP14|PTPRK|ROCK1|SNAI2|STRN|TEK|THBS1|TLN1|NRP1|GJC1|FERMT2|CORO1C|PARD6A|HEG1|MICALL2|MTDH	-0.644198	0	53	0	0	-3.05732	5.06129
1	-2.32408	GO:0034504	M1	1	0	GO Biological Processes	19	protein localization to nucleus	-2.32408	1.77725	2.94877	24155	262	1245	24	1.92771	0.389681	580|2932|3836|3840|4928|5295|5469|6135|6774|9258|10347|11315|25885|26060|26108|51068|51194|51715|55374|55929|80279|114882|151636|503542	BARD1|GSK3B|KPNA1|KPNA4|NUP98|PIK3R1|MED1|RPL11|STAT3|MFHAS1|ABCA7|PARK7|POLR1A|APPL1|PYGO1|NMD3|IPO11|RAB23|TMCO6|DMAP1|CDK5RAP3|OSBPL8|DTX3L|SPRN	-0.64202	0	67	0	0	-2.74185	1.77725
1	-2.30914	GO:0030838	M1	1	0	GO Biological Processes	19	positive regulation of actin filament polymerization	-2.30914	2.35171	3.14164	24155	99	1245	12	0.963855	0.276897	382|1739|2241|2764|4690|5987|9530|10097|10787|23191|84501|374666	ARF6|DLG1|FER|GMFB|NCK1|TRIM27|BAG4|ACTR2|NCKAP1|CYFIP1|SPIRE2|WASH3P	-0.628395	0	16	0	0	-4.67817	3.2336
1	-2.30567	GO:0002263	M1	1	0	GO Biological Processes	19	cell activation involved in immune response	-2.30567	1.4422	2.79401	24155	713	1245	53	4.25703	0.572166	102|960|1773|2212|2241|2357|2358|2683|3312|3482|3685|4035|4718|5294|5478|5660|5708|5724|5878|5912|6093|6774|7077|7099|7879|8635|8694|8832|10097|10312|10450|11031|11322|22918|23191|23200|23228|23317|25852|28956|51552|53916|53917|54542|55183|79169|83858|114548|139818|158747|165918|196527|374395	ADAM10|CD44|DNASE1|FCGR2A|FER|FPR1|FPR2|B4GALT1|HSPA8|IGF2R|ITGAV|LRP1|NDUFC2|PIK3CG|PPIA|PSAP|PSMD2|PTAFR|RAB5C|RAP2B|ROCK1|STAT3|TIMP2|TLR4|RAB7A|RNASET2|DGAT1|CD84|ACTR2|TCIRG1|PPIE|RAB31|TMC6|CD93|CYFIP1|ATP11B|PLCL2|DNAJC13|ARMC8|LAMTOR2|RAB14|RAB4B|RAB24|RC3H2|RIF1|C1orf35|ATAD3B|NLRP3|DOCK11|MOSPD2|RNF168|ANO6|TMEM179B	-0.626234	0	38	0	0	-3.48878	1.68101
1	-2.30275	GO:0006281	M1	1	0	GO Biological Processes	19	DNA repair	-2.30275	1.50862	2.82067	24155	553	1245	43	3.45382	0.517526	545|580|2140|2967|4439|5883|5965|5981|7528|9320|9400|10097|10450|10519|11073|11315|23064|23201|25939|27434|51149|54780|55120|55183|55611|55929|57461|57551|79008|79661|84309|84501|125150|126074|131870|151636|151987|158880|165918|199990|257218|375748|404672	ATR|BARD1|EYA3|GTF2H3|MSH5|RAD9A|RECQL|RFC1|YY1|TRIP12|RECQL5|ACTR2|PPIE|CIB1|TOPBP1|PARK7|SETX|FAM168A|SAMHD1|POLM|MRNIP|NSMCE4A|FANCL|RIF1|OTUB1|DMAP1|ISY1|TAOK1|SLX1B|NEIL1|NUDT16L1|SPIRE2|ZSWIM7|SWSAP1|NUDT16|DTX3L|PPP4R2|USP51|RNF168|FAAP20|SHPRH|ERCC6L2|GTF2H5	-0.624622	0	30	0	0	-3.92727	4.8504
1	-2.29498	GO:1903510	M1	1	0	GO Biological Processes	19	mucopolysaccharide metabolic process	-2.29498	2.25197	3.09582	24155	112	1245	13	1.04418	0.288087	960|1464|2683|3340|3373|9334|9469|10894|22856|23670|29940|51363|55454	CD44|CSPG4|B4GALT1|NDST1|HYAL1|B4GALT5|CHST3|LYVE1|CHSY1|CEMIP2|DSE|CHST15|CSGALNACT2	-0.618152	0	33	0	0	-3.78704	4.47729
1	-2.28595	GO:0060560	M1	1	0	GO Biological Processes	19	developmental growth involved in morphogenesis	-2.28595	1.81632	2.93144	24155	235	1245	22	1.76707	0.373397	1901|2246|2335|2932|3676|4035|4131|5048|5469|6259|6586|8828|8829|9353|9839|10413|10631|23191|51199|55897|91584|118813	S1PR1|FGF1|FN1|GSK3B|ITGA4|LRP1|MAP1B|PAFAH1B1|MED1|RYK|SLIT3|NRP2|NRP1|SLIT2|ZEB2|YAP1|POSTN|CYFIP1|NIN|MESP1|PLXNA4|ZFYVE27	-0.611713	0	40	0	0	-3.40307	3.1584
1	-2.28595	GO:0046777	M1	1	0	GO Biological Processes	19	protein autophosphorylation	-2.28595	1.81632	2.93144	24155	235	1245	22	1.76707	0.373397	545|857|1196|1198|1436|1636|2081|2241|2321|2932|3717|4921|5062|5156|5159|5529|5912|7010|22853|25989|51755|57551	ATR|CAV1|CLK2|CLK3|CSF1R|ACE|ERN1|FER|FLT1|GSK3B|JAK2|DDR2|PAK2|PDGFRA|PDGFRB|PPP2R5E|RAP2B|TEK|LMTK2|ULK3|CDK12|TAOK1	-0.611713	0	91	1	1	-2.28595	1.81632
1	-2.28024	GO:2001235	M1	1	0	GO Biological Processes	19	positive regulation of apoptotic signaling pathway	-2.28024	1.951	2.97704	24155	179	1245	18	1.44578	0.338302	857|2932|3624|3717|4690|5062|5599|5883|6135|6498|7057|7529|7755|8406|10134|10955|11315|93974	CAV1|GSK3B|INHBA|JAK2|NCK1|PAK2|MAPK8|RAD9A|RPL11|SKIL|THBS1|YWHAB|ZNF205|SRPX|BCAP31|SERINC3|PARK7|ATP5IF1	-0.607295	0	34	0	0	-3.61525	2.4252
1	-2.27674	GO:0045333	M1	1	0	GO Biological Processes	19	cellular respiration	-2.27674	1.91	2.95887	24155	193	1245	19	1.5261	0.347431	1350|3091|4695|4700|4716|4718|4725|4728|4729|4731|5290|11315|23410|27089|29796|56181|57017|93058|728294	COX7C|HIF1A|NDUFA2|NDUFA6|NDUFB10|NDUFC2|NDUFS5|NDUFS8|NDUFV2|NDUFV3|PIK3CA|PARK7|SIRT3|UQCRQ|UQCR10|MTFR1L|COQ9|COQ10A|D2HGDH	-0.607065	0	9	0	0	-5.12475	3.52756
1	-2.27616	GO:0045648	M1	1	0	GO Biological Processes	19	positive regulation of erythrocyte differentiation	-2.27616	3.6378	3.48071	24155	32	1245	6	0.481928	0.196272	2113|3091|3624|5469|6774|129138	ETS1|HIF1A|INHBA|MED1|STAT3|ANKRD54	-0.607065	0	55	0	0	-2.99215	3.6378
1	-2.27616	GO:0043552	M1	1	0	GO Biological Processes	19	positive regulation of phosphatidylinositol 3-kinase activity	-2.27616	3.6378	3.48071	24155	32	1245	6	0.481928	0.196272	2321|2358|5156|5159|7010|30849	FLT1|FPR2|PDGFRA|PDGFRB|TEK|PIK3R4	-0.607065	0	64	0	0	-2.78407	8.31497
1	-2.27393	GO:0036503	M1	1	0	GO Biological Processes	19	ERAD pathway	-2.27393	2.32819	3.1026	24155	100	1245	12	0.963855	0.276897	550|857|6400|7327|10134|23753|51035|51608|55139|84236|93611|118424	AUP1|CAV1|SEL1L|UBE2G2|BCAP31|SDF2L1|UBXN1|GET4|ANKZF1|RHBDD1|FBXO44|UBE2J2	-0.606504	0	19	0	0	-4.50317	2.32819
1	-2.27179	GO:0034470	M1	1	0	GO Biological Processes	19	ncRNA processing	-2.27179	1.6168	2.84023	24155	384	1245	32	2.57028	0.448489	6135|8568|9188|22803|23536|27079|51013|51077|51093|51367|54059|54522|54606|54663|54973|55272|55695|63899|64852|79922|81890|83707|84705|92345|126789|131870|134637|153443|155400|260294|339487|404672	RPL11|RRP1|DDX21|XRN2|ADAT1|RPUSD2|EXOSC1|FCF1|RRNAD1|POP5|YBEY|ANKRD16|DDX56|WDR74|INTS11|IMP3|NSUN5|NSUN3|TUT1|MRM1|QTRT1|TRPT1|GTPBP3|NAF1|PUSL1|NUDT16|ADAT2|SRFBP1|NSUN5P1|NSUN5P2|ZBTB8OS|GTF2H5	-0.606504	0	41	0	0	-3.39313	4.31147
1	-2.27288	GO:0043550	M1	1	0	GO Biological Processes	19	regulation of lipid kinase activity	-2.27288	2.72835	3.22746	24155	64	1245	9	0.722892	0.240091	2321|2358|5156|5159|5295|5933|7010|9711|30849	FLT1|FPR2|PDGFRA|PDGFRB|PIK3R1|RBL1|TEK|RUBCN|PIK3R4	-0.606504	0	64	0	0	-2.78407	8.31497
1	-2.26712	GO:1901652	M1	1	0	GO Biological Processes	19	response to peptide	-2.26712	1.51806	2.79496	24155	524	1245	41	3.29317	0.505768	182|523|632|781|857|1385|1398|2101|2200|2241|2358|2932|3676|3717|4035|4131|4644|4690|4976|5290|5295|5621|5781|6093|6429|6678|6774|7010|7099|7391|7442|8890|10312|11031|23191|26060|55667|57085|114814|114882|245973	JAG1|ATP6V1A|BGLAP|CACNA2D1|CAV1|CREB1|CRK|ESRRA|FBN1|FER|FPR2|GSK3B|ITGA4|JAK2|LRP1|MAP1B|MYO5A|NCK1|OPA1|PIK3CA|PIK3R1|PRNP|PTPN11|ROCK1|SRSF4|SPARC|STAT3|TEK|TLR4|USF1|TRPV1|EIF2B4|TCIRG1|RAB31|CYFIP1|APPL1|DENND4C|AGTRAP|GNRHR2|OSBPL8|ATP6V1C2	-0.603101	0	7	0	0	-5.40262	1.87757
1	-2.26019	GO:0010876	M1	1	0	GO Biological Processes	19	lipid localization	-2.26019	1.60063	2.82376	24155	400	1245	33	2.6506	0.455255	19|522|857|1636|3624|3685|3690|3949|4035|5660|5781|6578|7057|7357|8204|8694|8792|10347|10809|11309|23200|26020|26580|55852|57205|64801|81575|114882|114885|128486|147011|286256|286410	ABCA1|ATP5PF|CAV1|ACE|INHBA|ITGAV|ITGB3|LDLR|LRP1|PSAP|PTPN11|SLCO2A1|THBS1|UGCG|NRIP1|DGAT1|TNFRSF11A|ABCA7|STARD10|SLCO2B1|ATP11B|LRP10|BSCL2|TEX2|ATP10D|ARV1|APOLD1|OSBPL8|OSBPL11|FITM2|PROCA1|LCN12|ATP11C	-0.597433	0	72	0	0	-2.71079	2.85318
1	-2.25825	GO:0006753	M1	1	0	GO Biological Processes	19	nucleoside phosphate metabolic process	-2.25825	1.43415	2.75109	24155	717	1245	53	4.25703	0.572166	509|516|517|521|522|523|539|1350|1739|2977|2980|3091|3098|3312|4695|4700|4716|4718|4725|4728|4729|4731|4832|4928|4976|6774|6818|8086|8694|8760|9524|10476|10591|10632|11315|25796|25939|26137|27089|29796|51715|55191|57017|60490|79646|79661|79717|93974|125061|131870|374659|377841|441531	ATP5F1C|ATP5MC1|ATP5MC2|ATP5ME|ATP5PF|ATP6V1A|ATP5PO|COX7C|DLG1|GUCY1A2|GUCA2A|HIF1A|HK1|HSPA8|NDUFA2|NDUFA6|NDUFB10|NDUFC2|NDUFS5|NDUFS8|NDUFV2|NDUFV3|NME3|NUP98|OPA1|STAT3|SULT1A3|AAAS|DGAT1|CDS2|TECR|ATP5PD|DNPH1|ATP5MG|PARK7|PGLS|SAMHD1|ZBTB20|UQCRQ|UQCR10|RAB23|NADSYN1|COQ9|PPCDC|PANK3|NEIL1|PPCS|ATP5IF1|AFMID|NUDT16|HDDC3|ENTPD8|PGAM4	-0.596749	0	9	0	0	-5.12475	3.52756
1	-2.25351	GO:0010869	M1	1	0	GO Biological Processes	19	regulation of receptor biosynthetic process	-2.25351	4.21774	3.59903	24155	23	1245	5	0.401606	0.179243	3091|3685|3690|3717|11315	HIF1A|ITGAV|ITGB3|JAK2|PARK7	-0.594511	0	78	0	0	-2.59655	4.21774
1	-2.25394	GO:0006643	M1	1	0	GO Biological Processes	19	membrane lipid metabolic process	-2.25394	1.86554	2.92253	24155	208	1245	20	1.60643	0.356311	4258|5660|6610|7357|8818|9334|9524|10955|51227|54344|54982|55852|64801|79690|84002|94101|142891|151742|253782|256435	MGST2|PSAP|SMPD2|UGCG|DPM2|B4GALT5|TECR|SERINC3|PIGP|DPM3|CLN6|TEX2|ARV1|GAL3ST4|B3GNT5|ORMDL1|SAMD8|PPM1L|CERS6|ST6GALNAC3	-0.594511	0	92	1	1	-2.25394	1.86554
1	-2.25155	GO:0006909	M1	1	0	GO Biological Processes	19	phagocytosis	-2.25155	1.62554	2.82664	24155	370	1245	31	2.48996	0.441607	19|1398|2212|2358|3685|3690|3949|4035|4627|4690|5290|5291|5295|7057|7099|7879|8406|9711|10097|10347|10787|11031|22918|23191|23603|26060|51552|55113|79767|84286|196527	ABCA1|CRK|FCGR2A|FPR2|ITGAV|ITGB3|LDLR|LRP1|MYH9|NCK1|PIK3CA|PIK3CB|PIK3R1|THBS1|TLR4|RAB7A|SRPX|RUBCN|ACTR2|ABCA7|NCKAP1|RAB31|CD93|CYFIP1|CORO1C|APPL1|RAB14|XKR8|ELMO3|TMEM175|ANO6	-0.593794	0	10	0	0	-5.12475	3.4357
1	-2.24978	GO:0007420	M1	1	0	GO Biological Processes	19	brain development	-2.24978	1.42737	2.74102	24155	734	1245	54	4.33735	0.577296	522|1281|1282|1385|1398|1436|1901|2009|2048|2113|2932|3084|3091|3624|4035|4155|5048|5469|5781|6259|6546|6586|6867|7707|8455|8516|8633|8828|8829|9095|9353|9839|10000|22803|27089|50944|51199|51506|54510|55773|57045|59345|79641|79934|79969|80264|80279|84002|84197|91584|113246|200894|339451|386724	ATP5PF|COL3A1|COL4A1|CREB1|CRK|CSF1R|S1PR1|EML1|EPHB2|ETS1|GSK3B|NRG1|HIF1A|INHBA|LRP1|MBP|PAFAH1B1|MED1|PTPN11|RYK|SLC8A1|SLIT3|TACC1|ZNF148|ATRN|ITGA8|UNC5C|NRP2|NRP1|TBX19|SLIT2|ZEB2|AKT3|XRN2|UQCRQ|SHANK1|NIN|UFC1|PCDH18|TBC1D23|TWSG1|GNB4|ROGDI|COQ8B|ATAT1|ZNF430|CDK5RAP3|B3GNT5|POMK|PLXNA4|C12orf57|ARL13B|KLHL17|AMIGO3	-0.593271	0	62	0	0	-2.83841	1.91715
1	-2.2393	GO:0031532	M1	1	0	GO Biological Processes	19	actin cytoskeleton reorganization	-2.2393	2.30514	3.06402	24155	101	1245	12	0.963855	0.276897	1436|1901|2241|4627|5156|7010|8829|26037|27032|55742|79778|84168	CSF1R|S1PR1|FER|MYH9|PDGFRA|TEK|NRP1|SIPA1L1|ATP2C1|PARVA|MICALL2|ANTXR1	-0.585267	0	4	0	0	-6.06723	3.64981
1	-2.2393	GO:1990542	M1	1	0	GO Biological Processes	19	mitochondrial transmembrane transport	-2.2393	2.30514	3.06402	24155	101	1245	12	0.963855	0.276897	509|516|517|521|522|539|4976|10476|10632|54543|81894|123096	ATP5F1C|ATP5MC1|ATP5MC2|ATP5ME|ATP5PF|ATP5PO|OPA1|ATP5PD|ATP5MG|TOMM7|SLC25A28|SLC25A29	-0.585267	0	8	0	0	-5.12745	6.74838
1	-2.23622	GO:0050680	M1	1	0	GO Biological Processes	19	negative regulation of epithelial cell proliferation	-2.23622	1.97501	2.9474	24155	167	1245	17	1.36546	0.328904	367|687|857|1386|1739|1948|2321|5469|5796|6591|6678|7057|60485|64743|93974|126695|135228	AR|KLF9|CAV1|ATF2|DLG1|EFNB2|FLT1|MED1|PTPRK|SNAI2|SPARC|THBS1|SAV1|WDR13|ATP5IF1|KDF1|CD109	-0.583415	0	5	0	0	-5.90668	10.447
1	-2.23116	GO:0008154	M1	1	0	GO Biological Processes	19	actin polymerization or depolymerization	-2.23116	1.85661	2.8994	24155	209	1245	20	1.60643	0.356311	382|1739|2241|2764|3717|4690|5987|6711|9113|9353|9530|10097|10787|22921|23191|79778|80206|84501|93663|374666	ARF6|DLG1|FER|GMFB|JAK2|NCK1|TRIM27|SPTBN1|LATS1|SLIT2|BAG4|ACTR2|NCKAP1|MSRB2|CYFIP1|MICALL2|FHOD3|SPIRE2|ARHGAP18|WASH3P	-0.579589	0	16	0	0	-4.67817	3.2336
1	-2.22799	GO:0045739	M1	1	0	GO Biological Processes	19	positive regulation of DNA repair	-2.22799	2.68638	3.17365	24155	65	1245	9	0.722892	0.240091	2140|10097|23201|51149|55183|84501|131870|151636|165918	EYA3|ACTR2|FAM168A|MRNIP|RIF1|SPIRE2|NUDT16|DTX3L|RNF168	-0.57764	0	30	0	0	-3.92727	4.8504
1	-2.22354	GO:0070126	M1	1	0	GO Biological Processes	19	mitochondrial translational termination	-2.22354	2.39795	3.08001	24155	89	1245	11	0.883534	0.265216	6150|51069|54998|55052|64951|64960|64976|64983|65993|118487|128308	MRPL23|MRPL2|AURKAIP1|MRPL20|MRPS24|MRPS15|MRPL40|MRPL32|MRPS34|CHCHD1|MRPL55	-0.574408	0	24	0	0	-4.09469	2.61595
1	-2.22115	GO:0045773	M1	1	0	GO Biological Processes	19	positive regulation of axon extension	-2.22115	3.1584	3.3023	24155	43	1245	7	0.562249	0.211912	2335|4035|4131|5048|8829|23191|118813	FN1|LRP1|MAP1B|PAFAH1B1|NRP1|CYFIP1|ZFYVE27	-0.573824	0	40	0	0	-3.40307	3.1584
1	-2.21689	GO:0090197	M1	1	0	GO Biological Processes	19	positive regulation of chemokine secretion	-2.21689	5.17376	3.76939	24155	15	1245	4	0.321285	0.160384	1436|4035|4155|10631	CSF1R|LRP1|MBP|POSTN	-0.573824	0	47	0	0	-3.27953	14.5512
1	-2.21808	GO:0031397	M1	1	0	GO Biological Processes	19	negative regulation of protein ubiquitination	-2.21808	2.51969	3.11356	24155	77	1245	10	0.803213	0.252976	857|6135|9320|11315|51035|51160|54765|55611|59343|151636	CAV1|RPL11|TRIP12|PARK7|UBXN1|VPS28|TRIM44|OTUB1|SENP2|DTX3L	-0.573824	0	59	0	0	-2.89862	11.641
1	-2.21689	GO:0006491	M1	1	0	GO Biological Processes	19	N-glycan processing	-2.21689	5.17376	3.76939	24155	15	1245	4	0.321285	0.160384	2530|4121|4124|79158	FUT8|MAN1A1|MAN2A1|GNPTAB	-0.573824	0	93	1	1	-2.21689	5.17376
1	-2.21689	GO:1902187	M1	1	0	GO Biological Processes	19	negative regulation of viral release from host cell	-2.21689	5.17376	3.76939	24155	15	1245	4	0.321285	0.160384	5987|11043|22954|81559	TRIM27|MID2|TRIM32|TRIM11	-0.573824	0	94	1	1	-2.21689	5.17376
1	-2.2086	GO:0051701	M1	1	0	GO Biological Processes	19	interaction with host	-2.2086	1.84777	2.87639	24155	210	1245	20	1.60643	0.356311	857|1948|3373|3685|3690|3693|3836|3840|3949|4360|5478|5987|7879|11043|22954|28996|30835|79228|81559|83737	CAV1|EFNB2|HYAL1|ITGAV|ITGB3|ITGB5|KPNA1|KPNA4|LDLR|MRC1|PPIA|TRIM27|RAB7A|MID2|TRIM32|HIPK2|CD209|THOC6|TRIM11|ITCH	-0.567339	0	94	0	0	-2.21689	5.17376
1	-2.20801	GO:0018279	M1	1	0	GO Biological Processes	19	protein N-linked glycosylation via asparagine	-2.20801	3.52756	3.38703	24155	33	1245	6	0.481928	0.196272	2530|4249|6480|7327|8818|54344	FUT8|MGAT5|ST6GAL1|UBE2G2|DPM2|DPM3	-0.567339	0	95	1	1	-2.20801	3.52756
1	-2.20107	GO:0046578	M1	1	0	GO Biological Processes	19	regulation of Ras protein signal transduction	-2.20107	1.78592	2.84643	24155	239	1245	22	1.76707	0.373397	19|382|1281|1398|2048|2149|3084|3717|5159|5922|5924|6655|7077|7204|8829|23362|27237|27352|57493|83892|152273|253980	ABCA1|ARF6|COL3A1|CRK|EPHB2|F2R|NRG1|JAK2|PDGFRB|RASA2|RASGRF2|SOS2|TIMP2|TRIO|NRP1|PSD3|ARHGEF16|SGSM3|HEG1|KCTD10|FGD5|KCTD13	-0.56523	0	13	0	0	-4.84468	1.90212
1	-2.20126	GO:0035926	M1	1	0	GO Biological Processes	19	chemokine (C-C motif) ligand 2 secretion	-2.20126	7.2756	4.13843	24155	8	1245	3	0.240964	0.138953	4035|4155|10631	LRP1|MBP|POSTN	-0.56523	0	47	0	0	-3.27953	14.5512
1	-2.19996	GO:0032606	M1	1	0	GO Biological Processes	19	type I interferon production	-2.19996	2.12205	2.96711	24155	128	1245	14	1.1245	0.29884	3661|3665|4791|5781|5966|7099|7528|10146|22954|26137|56919|63906|83737|170506	IRF3|IRF7|NFKB2|PTPN11|REL|TLR4|YY1|G3BP1|TRIM32|ZBTB20|DHX33|GPATCH3|ITCH|DHX36	-0.56523	0	70	0	0	-2.72092	2.12205
1	-2.20126	GO:1902302	M1	1	0	GO Biological Processes	19	regulation of potassium ion export	-2.20126	7.2756	4.13843	24155	8	1245	3	0.240964	0.138953	1739|30819|196527	DLG1|KCNIP2|ANO6	-0.56523	0	96	1	1	-2.20126	7.2756
1	-2.20126	GO:1903764	M1	1	0	GO Biological Processes	19	regulation of potassium ion export across plasma membrane	-2.20126	7.2756	4.13843	24155	8	1245	3	0.240964	0.138953	1739|30819|196527	DLG1|KCNIP2|ANO6	-0.56523	0	96	0	0	-2.20126	7.2756
1	-2.17055	GO:0003206	M1	1	0	GO Biological Processes	19	cardiac chamber morphogenesis	-2.17055	2.1056	2.93507	24155	129	1245	14	1.1245	0.29884	182|3084|3091|5469|6586|7010|8828|8829|9353|23414|55742|55897|57493|60485	JAG1|NRG1|HIF1A|MED1|SLIT3|TEK|NRP2|NRP1|SLIT2|ZFPM2|PARVA|MESP1|HEG1|SAV1	-0.538178	0	29	0	0	-3.94885	2.1056
1	-2.17057	GO:0014850	M1	1	0	GO Biological Processes	19	response to muscle activity	-2.17057	4.042	3.47571	24155	24	1245	5	0.401606	0.179243	522|3091|4976|10631|84808	ATP5PF|HIF1A|OPA1|POSTN|PERM1	-0.538178	0	97	1	1	-2.17057	4.042
1	-2.16523	GO:0050654	M1	1	0	GO Biological Processes	19	chondroitin sulfate proteoglycan metabolic process	-2.16523	3.08662	3.22945	24155	44	1245	7	0.562249	0.211912	1464|3373|9469|22856|29940|51363|55454	CSPG4|HYAL1|CHST3|CHSY1|DSE|CHST15|CSGALNACT2	-0.5347	0	33	0	0	-3.78704	4.47729
1	-2.16357	GO:0043551	M1	1	0	GO Biological Processes	19	regulation of phosphatidylinositol 3-kinase activity	-2.16357	2.82205	3.15355	24155	55	1245	8	0.64257	0.226452	2321|2358|5156|5159|5295|7010|9711|30849	FLT1|FPR2|PDGFRA|PDGFRB|PIK3R1|TEK|RUBCN|PIK3R4	-0.5347	0	64	0	0	-2.78407	8.31497
1	-2.1641	GO:0002064	M1	1	0	GO Biological Processes	19	epithelial cell development	-2.1641	1.83034	2.83075	24155	212	1245	20	1.60643	0.356311	182|367|1903|2683|2932|3091|3274|4659|5048|5420|5660|5912|6093|7716|9497|23022|51735|57493|122786|126695	JAG1|AR|S1PR3|B4GALT1|GSK3B|HIF1A|HRH2|PPP1R12A|PAFAH1B1|PODXL|PSAP|RAP2B|ROCK1|VEZF1|SLC4A7|PALLD|RAPGEF6|HEG1|FRMD6|KDF1	-0.5347	0	98	1	1	-2.1641	3.42381
1	-2.16183	GO:0002366	M1	1	0	GO Biological Processes	19	leukocyte activation involved in immune response	-2.16183	1.42297	2.66478	24155	709	1245	52	4.17671	0.56698	102|960|1773|2212|2241|2357|2358|2683|3312|3482|3685|4718|5294|5478|5660|5708|5724|5878|5912|6093|6774|7077|7099|7879|8635|8694|8832|10097|10312|10450|11031|11322|22918|23191|23200|23228|23317|25852|28956|51552|53916|53917|54542|55183|79169|83858|114548|139818|158747|165918|196527|374395	ADAM10|CD44|DNASE1|FCGR2A|FER|FPR1|FPR2|B4GALT1|HSPA8|IGF2R|ITGAV|NDUFC2|PIK3CG|PPIA|PSAP|PSMD2|PTAFR|RAB5C|RAP2B|ROCK1|STAT3|TIMP2|TLR4|RAB7A|RNASET2|DGAT1|CD84|ACTR2|TCIRG1|PPIE|RAB31|TMC6|CD93|CYFIP1|ATP11B|PLCL2|DNAJC13|ARMC8|LAMTOR2|RAB14|RAB4B|RAB24|RC3H2|RIF1|C1orf35|ATAD3B|NLRP3|DOCK11|MOSPD2|RNF168|ANO6|TMEM179B	-0.534121	0	38	0	0	-3.48878	1.68101
1	-2.15903	GO:0010506	M1	1	0	GO Biological Processes	19	regulation of autophagy	-2.15903	1.6462	2.75532	24155	330	1245	28	2.249	0.420214	523|1981|1982|2081|2932|3091|5290|5291|5599|5660|5899|6093|6625|6774|9711|9821|10641|11043|11315|23118|25989|28956|54543|64121|84148|92140|93974|245973	ATP6V1A|EIF4G1|EIF4G2|ERN1|GSK3B|HIF1A|PIK3CA|PIK3CB|MAPK8|PSAP|RALB|ROCK1|SNRNP70|STAT3|RUBCN|RB1CC1|NPRL2|MID2|PARK7|TAB2|ULK3|LAMTOR2|TOMM7|RRAGC|KAT8|MTDH|ATP5IF1|ATP6V1C2	-0.532485	0	52	0	0	-3.07112	1.65859
1	-2.15034	GO:0009117	M1	1	0	GO Biological Processes	19	nucleotide metabolic process	-2.15034	1.42096	2.65408	24155	710	1245	52	4.17671	0.56698	509|516|517|521|522|523|539|1350|1739|2977|2980|3091|3098|3312|4695|4700|4716|4718|4725|4728|4729|4731|4832|4928|4976|6774|6818|8086|8694|8760|9524|10476|10591|10632|11315|25796|25939|26137|27089|29796|51715|55191|57017|60490|79646|79661|79717|93974|125061|131870|374659|441531	ATP5F1C|ATP5MC1|ATP5MC2|ATP5ME|ATP5PF|ATP6V1A|ATP5PO|COX7C|DLG1|GUCY1A2|GUCA2A|HIF1A|HK1|HSPA8|NDUFA2|NDUFA6|NDUFB10|NDUFC2|NDUFS5|NDUFS8|NDUFV2|NDUFV3|NME3|NUP98|OPA1|STAT3|SULT1A3|AAAS|DGAT1|CDS2|TECR|ATP5PD|DNPH1|ATP5MG|PARK7|PGLS|SAMHD1|ZBTB20|UQCRQ|UQCR10|RAB23|NADSYN1|COQ9|PPCDC|PANK3|NEIL1|PPCS|ATP5IF1|AFMID|NUDT16|HDDC3|PGAM4	-0.527254	0	9	0	0	-5.12475	3.52756
1	-2.15126	GO:0014033	M1	1	0	GO Biological Processes	19	neural crest cell differentiation	-2.15126	2.34525	2.99713	24155	91	1245	11	0.883534	0.265216	182|1909|2335|3084|3091|6591|8828|8829|9839|10016|23603	JAG1|EDNRA|FN1|NRG1|HIF1A|SNAI2|NRP2|NRP1|ZEB2|PDCD6|CORO1C	-0.527254	0	60	0	0	-2.89862	11.641
1	-2.15126	GO:0014909	M1	1	0	GO Biological Processes	19	smooth muscle cell migration	-2.15126	2.34525	2.99713	24155	91	1245	11	0.883534	0.265216	1398|1636|3690|4035|5054|5159|8829|9353|10631|54434|55742	CRK|ACE|ITGB3|LRP1|SERPINE1|PDGFRB|NRP1|SLIT2|POSTN|SSH1|PARVA	-0.527254	0	99	1	1	-2.15126	2.34525
1	-2.14266	GO:0043276	M1	1	0	GO Biological Processes	19	anoikis	-2.14266	3.42381	3.29691	24155	34	1245	6	0.481928	0.196272	166|857|5290|6591|25855|51651	TLE5|CAV1|PIK3CA|SNAI2|BRMS1|PTRH2	-0.524147	0	56	0	0	-2.95158	8.31497
1	-2.14266	GO:0018196	M1	1	0	GO Biological Processes	19	peptidyl-asparagine modification	-2.14266	3.42381	3.29691	24155	34	1245	6	0.481928	0.196272	2530|4249|6480|7327|8818|54344	FUT8|MGAT5|ST6GAL1|UBE2G2|DPM2|DPM3	-0.524147	0	95	0	0	-2.20801	3.52756
1	-2.14266	GO:0003382	M1	1	0	GO Biological Processes	19	epithelial cell morphogenesis	-2.14266	3.42381	3.29691	24155	34	1245	6	0.481928	0.196272	367|3274|6093|23022|57493|122786	AR|HRH2|ROCK1|PALLD|HEG1|FRMD6	-0.524147	0	98	0	0	-2.1641	3.42381
1	-2.14266	GO:0033120	M1	1	0	GO Biological Processes	19	positive regulation of RNA splicing	-2.14266	3.42381	3.29691	24155	34	1245	6	0.481928	0.196272	2081|4928|5295|6625|23064|29896	ERN1|NUP98|PIK3R1|SNRNP70|SETX|TRA2A	-0.524147	0	100	1	1	-2.14266	3.42381
1	-2.1397	GO:0030193	M1	1	0	GO Biological Processes	19	regulation of blood coagulation	-2.1397	2.4559	3.02148	24155	79	1245	10	0.803213	0.252976	857|2149|5054|5156|7056|7057|7099|7391|10019|196527	CAV1|F2R|SERPINE1|PDGFRA|THBD|THBS1|TLR4|USF1|SH2B3|ANO6	-0.523618	0	35	0	0	-3.57985	7.76064
1	-2.14033	GO:0010769	M1	1	0	GO Biological Processes	19	regulation of cell morphogenesis involved in differentiation	-2.14033	1.67589	2.7507	24155	301	1245	26	2.08835	0.405261	102|1398|2048|2335|2932|4035|4131|4241|4976|5048|6259|6498|8829|9353|9839|10097|10154|10519|10631|23191|23603|26037|51199|91584|118813|170506	ADAM10|CRK|EPHB2|FN1|GSK3B|LRP1|MAP1B|MELTF|OPA1|PAFAH1B1|RYK|SKIL|NRP1|SLIT2|ZEB2|ACTR2|PLXNC1|CIB1|POSTN|CYFIP1|CORO1C|SIPA1L1|NIN|PLXNA4|ZFYVE27|DHX36	-0.523618	0	40	0	0	-3.40307	3.1584
1	-2.13873	GO:0014812	M1	1	0	GO Biological Processes	19	muscle cell migration	-2.13873	2.23865	2.95097	24155	104	1245	12	0.963855	0.276897	1398|1636|3690|4035|5054|5159|6093|8829|9353|10631|54434|55742	CRK|ACE|ITGB3|LRP1|SERPINE1|PDGFRB|ROCK1|NRP1|SLIT2|POSTN|SSH1|PARVA	-0.523618	0	99	0	0	-2.15126	2.34525
1	-2.13437	GO:0021953	M1	1	0	GO Biological Processes	19	central nervous system neuron differentiation	-2.13437	1.88772	2.82551	24155	185	1245	18	1.44578	0.338302	1009|1398|1436|2048|3110|3624|5048|6259|6586|8828|8829|9334|9353|9839|27089|51199|91584|113246	CDH11|CRK|CSF1R|EPHB2|MNX1|INHBA|PAFAH1B1|RYK|SLIT3|NRP2|NRP1|B4GALT5|SLIT2|ZEB2|UQCRQ|NIN|PLXNA4|C12orf57	-0.520376	0	17	0	0	-4.62037	12.9344
1	-2.13211	GO:0001654	M1	1	0	GO Biological Processes	19	eye development	-2.13211	1.60787	2.71647	24155	362	1245	30	2.40964	0.434605	182|1282|1427|1739|2048|2200|3091|3299|3624|4124|4976|5156|5159|5469|6498|6774|6935|7528|8829|9839|9997|10312|22803|23093|28996|57045|57381|91355|113246|131544	JAG1|COL4A1|CRYGS|DLG1|EPHB2|FBN1|HIF1A|HSF4|INHBA|MAN2A1|OPA1|PDGFRA|PDGFRB|MED1|SKIL|STAT3|ZEB1|YY1|NRP1|ZEB2|SCO2|TCIRG1|XRN2|TTLL5|HIPK2|TWSG1|RHOJ|LRP5L|C12orf57|CRYBG3	-0.519242	0	12	0	0	-4.93161	7.9889
1	-2.11111	GO:0045601	M1	1	0	GO Biological Processes	19	regulation of endothelial cell differentiation	-2.11111	3.01803	3.15865	24155	45	1245	7	0.562249	0.211912	182|1903|4659|6093|6935|7716|81575	JAG1|S1PR3|PPP1R12A|ROCK1|ZEB1|VEZF1|APOLD1	-0.502519	0	68	0	0	-2.72588	3.01803
1	-2.111	GO:0030324	M1	1	0	GO Biological Processes	19	lung development	-2.111	1.9176	2.81535	24155	172	1245	17	1.36546	0.328904	1385|2246|4015|4124|4323|5156|5159|6678|9509|10413|23414|51668|54542|57493|60485|64759|147372	CREB1|FGF1|LOX|MAN2A1|MMP14|PDGFRA|PDGFRB|SPARC|ADAMTS2|YAP1|ZFPM2|HSPB11|RC3H2|HEG1|SAV1|TNS3|CCBE1	-0.502519	0	69	0	0	-2.72196	2.09449
1	-2.10981	GO:0044546	M1	1	0	GO Biological Processes	19	NLRP3 inflammasome complex assembly	-2.10981	4.8504	3.59148	24155	16	1245	4	0.321285	0.160384	7099|56919|79969|114548	TLR4|DHX33|ATAT1|NLRP3	-0.502519	0	88	0	0	-2.38849	8.31497
1	-2.11293	GO:0042157	M1	1	0	GO Biological Processes	19	lipoprotein metabolic process	-2.11293	2.07345	2.87186	24155	131	1245	14	1.1245	0.29884	19|3685|3690|3949|4035|5494|7357|8818|11313|51227|54344|81575|253832|254359	ABCA1|ITGAV|ITGB3|LDLR|LRP1|PPM1A|UGCG|DPM2|LYPLA2|PIGP|DPM3|APOLD1|ZDHHC20|ZDHHC24	-0.502519	0	101	1	1	-2.11293	2.07345
1	-2.10981	GO:0030214	M1	1	0	GO Biological Processes	19	hyaluronan catabolic process	-2.10981	4.8504	3.59148	24155	16	1245	4	0.321285	0.160384	960|3373|10894|23670	CD44|HYAL1|LYVE1|CEMIP2	-0.502519	0	102	1	1	-2.10981	4.8504
1	-2.10168	GO:1900046	M1	1	0	GO Biological Processes	19	regulation of hemostasis	-2.10168	2.4252	2.97649	24155	80	1245	10	0.803213	0.252976	857|2149|5054|5156|7056|7057|7099|7391|10019|196527	CAV1|F2R|SERPINE1|PDGFRA|THBD|THBS1|TLR4|USF1|SH2B3|ANO6	-0.495497	0	35	0	0	-3.57985	7.76064
1	-2.09889	GO:0043281	M1	1	0	GO Biological Processes	19	regulation of cysteine-type endopeptidase activity involved in apoptotic process	-2.09889	1.8048	2.7632	24155	215	1245	20	1.60643	0.356311	842|960|2149|3717|5062|6478|7057|8797|8996|9131|10016|10134|11315|25824|55367|80759|96459|114548|400410|414899	CASP9|CD44|F2R|JAK2|PAK2|SIAH2|THBS1|TNFRSF10A|NOL3|AIFM1|PDCD6|BCAP31|PARK7|PRDX5|PIDD1|KHDC1|FNIP1|NLRP3|ST20|BLID	-0.494912	0	18	0	0	-4.6043	1.8048
1	-2.09973	GO:0018108	M1	1	0	GO Biological Processes	19	peptidyl-tyrosine phosphorylation	-2.09973	1.59903	2.68449	24155	364	1245	30	2.40964	0.434605	857|960|1196|1198|1436|1464|1636|2048|2241|2321|3084|3690|3717|4919|4921|5062|5156|5159|5168|5621|5781|5912|6259|6774|6868|7010|8829|10019|22853|84619	CAV1|CD44|CLK2|CLK3|CSF1R|CSPG4|ACE|EPHB2|FER|FLT1|NRG1|ITGB3|JAK2|ROR1|DDR2|PAK2|PDGFRA|PDGFRB|ENPP2|PRNP|PTPN11|RAP2B|RYK|STAT3|ADAM17|TEK|NRP1|SH2B3|LMTK2|ZGPAT	-0.494912	0	91	0	0	-2.28595	1.81632
1	-2.09216	GO:0045332	M1	1	0	GO Biological Processes	19	phospholipid translocation	-2.09216	3.88032	3.35891	24155	25	1245	5	0.401606	0.179243	19|10347|23200|57205|286410	ABCA1|ABCA7|ATP11B|ATP10D|ATP11C	-0.491464	0	87	0	0	-2.42104	3.88032
1	-2.09216	GO:0007026	M1	1	0	GO Biological Processes	19	negative regulation of microtubule depolymerization	-2.09216	3.88032	3.35891	24155	25	1245	5	0.401606	0.179243	4131|10519|57551|89795|157922	MAP1B|CIB1|TAOK1|NAV3|CAMSAP1	-0.491464	0	103	1	1	-2.09216	3.88032
1	-2.09216	GO:0090025	M1	1	0	GO Biological Processes	19	regulation of monocyte chemotaxis	-2.09216	3.88032	3.35891	24155	25	1245	5	0.401606	0.179243	2358|5054|9353|158747|196527	FPR2|SERPINE1|SLIT2|MOSPD2|ANO6	-0.491464	0	104	1	1	-2.09216	3.88032
1	-2.08773	GO:1905475	M1	1	0	GO Biological Processes	19	regulation of protein localization to membrane	-2.08773	1.86753	2.77625	24155	187	1245	18	1.44578	0.338302	102|367|382|1739|2048|4035|4323|5295|5599|5621|6711|7529|10082|10519|11079|26060|27237|54434	ADAM10|AR|ARF6|DLG1|EPHB2|LRP1|MMP14|PIK3R1|MAPK8|PRNP|SPTBN1|YWHAB|GPC6|CIB1|RER1|APPL1|ARHGEF16|SSH1	-0.488129	0	26	0	0	-4.08148	3.46457
1	-2.07994	GO:0035909	M1	1	0	GO Biological Processes	19	aorta morphogenesis	-2.07994	3.32599	3.21011	24155	35	1245	6	0.481928	0.196272	182|1281|1948|4035|4638|5159	JAG1|COL3A1|EFNB2|LRP1|MYLK|PDGFRB	-0.486818	0	80	0	0	-2.5343	4.8504
1	-2.07994	GO:0019076	M1	1	0	GO Biological Processes	19	viral release from host cell	-2.07994	3.32599	3.21011	24155	35	1245	6	0.481928	0.196272	5478|5987|7879|11043|22954|81559	PPIA|TRIM27|RAB7A|MID2|TRIM32|TRIM11	-0.486818	0	94	0	0	-2.21689	5.17376
1	-2.07994	GO:0035890	M1	1	0	GO Biological Processes	19	exit from host	-2.07994	3.32599	3.21011	24155	35	1245	6	0.481928	0.196272	5478|5987|7879|11043|22954|81559	PPIA|TRIM27|RAB7A|MID2|TRIM32|TRIM11	-0.486818	0	94	0	0	-2.21689	5.17376
1	-2.07994	GO:0035891	M1	1	0	GO Biological Processes	19	exit from host cell	-2.07994	3.32599	3.21011	24155	35	1245	6	0.481928	0.196272	5478|5987|7879|11043|22954|81559	PPIA|TRIM27|RAB7A|MID2|TRIM32|TRIM11	-0.486818	0	94	0	0	-2.21689	5.17376
1	-2.07994	GO:0052126	M1	1	0	GO Biological Processes	19	movement in host environment	-2.07994	3.32599	3.21011	24155	35	1245	6	0.481928	0.196272	5478|5987|7879|11043|22954|81559	PPIA|TRIM27|RAB7A|MID2|TRIM32|TRIM11	-0.486818	0	94	0	0	-2.21689	5.17376
1	-2.07994	GO:0052192	M1	1	0	GO Biological Processes	19	movement in environment of other organism involved in symbiotic interaction	-2.07994	3.32599	3.21011	24155	35	1245	6	0.481928	0.196272	5478|5987|7879|11043|22954|81559	PPIA|TRIM27|RAB7A|MID2|TRIM32|TRIM11	-0.486818	0	94	0	0	-2.21689	5.17376
1	-2.07346	GO:0003007	M1	1	0	GO Biological Processes	19	heart morphogenesis	-2.07346	1.7163	2.70703	24155	260	1245	23	1.84739	0.381633	182|1386|1901|3084|3091|4194|5469|6586|6591|7010|8828|8829|9095|9353|10413|23414|23768|55742|55897|57493|60485|200894|388591	JAG1|ATF2|S1PR1|NRG1|HIF1A|MDM4|MED1|SLIT3|SNAI2|TEK|NRP2|NRP1|TBX19|SLIT2|YAP1|ZFPM2|FLRT2|PARVA|MESP1|HEG1|SAV1|ARL13B|RNF207	-0.481409	0	29	0	0	-3.94885	2.1056
1	-2.07008	GO:0046148	M1	1	0	GO Biological Processes	19	pigment biosynthetic process	-2.07008	2.72303	3.03604	24155	57	1245	8	0.64257	0.226452	1652|3145|4644|5498|7220|9839|26060|93974	DDT|HMBS|MYO5A|PPOX|TRPC1|ZEB2|APPL1|ATP5IF1	-0.480167	0	82	0	0	-2.49955	4.61943
1	-2.07045	GO:0030031	M1	1	0	GO Biological Processes	19	cell projection assembly	-2.07045	1.44788	2.59642	24155	603	1245	45	3.61446	0.528984	382|755|857|1901|2012|2241|3797|4134|4638|4690|5048|5420|5912|6093|8481|8558|8829|9353|9530|9814|10097|10640|10787|23116|23191|23603|25970|27352|30845|49856|50807|51524|51668|51715|51735|55742|56683|57381|79598|79969|121441|139818|152273|196527|200894	ARF6|CFAP410|CAV1|S1PR1|EMP1|FER|KIF3C|MAP4|MYLK|NCK1|PAFAH1B1|PODXL|RAP2B|ROCK1|OFD1|CDK10|NRP1|SLIT2|BAG4|SFI1|ACTR2|EXOC5|NCKAP1|TOGARAM1|CYFIP1|CORO1C|SH2B1|SGSM3|EHD3|WRAP73|ASAP1|TMEM138|HSPB11|RAB23|RAPGEF6|PARVA|CFAP298|RHOJ|CEP97|ATAT1|NEDD1|DOCK11|FGD5|ANO6|ARL13B	-0.480167	0	105	1	1	-2.07045	1.44788
1	-2.06777	GO:0150063	M1	1	0	GO Biological Processes	19	visual system development	-2.06777	1.5903	2.6527	24155	366	1245	30	2.40964	0.434605	182|1282|1427|1739|2048|2200|3091|3299|3624|4124|4976|5156|5159|5469|6498|6774|6935|7528|8829|9839|9997|10312|22803|23093|28996|57045|57381|91355|113246|131544	JAG1|COL4A1|CRYGS|DLG1|EPHB2|FBN1|HIF1A|HSF4|INHBA|MAN2A1|OPA1|PDGFRA|PDGFRB|MED1|SKIL|STAT3|ZEB1|YY1|NRP1|ZEB2|SCO2|TCIRG1|XRN2|TTLL5|HIPK2|TWSG1|RHOJ|LRP5L|C12orf57|CRYBG3	-0.478919	0	12	0	0	-4.93161	7.9889
1	-2.06441	GO:0007045	M1	1	0	GO Biological Processes	19	cell-substrate adherens junction assembly	-2.06441	2.39526	2.93218	24155	81	1245	10	0.803213	0.252976	87|4035|4323|5796|6093|7010|7057|8829|10979|23603	ACTN1|LRP1|MMP14|PTPRK|ROCK1|TEK|THBS1|NRP1|FERMT2|CORO1C	-0.477679	0	53	0	0	-3.05732	5.06129
1	-2.06441	GO:0048041	M1	1	0	GO Biological Processes	19	focal adhesion assembly	-2.06441	2.39526	2.93218	24155	81	1245	10	0.803213	0.252976	87|4035|4323|5796|6093|7010|7057|8829|10979|23603	ACTN1|LRP1|MMP14|PTPRK|ROCK1|TEK|THBS1|NRP1|FERMT2|CORO1C	-0.477679	0	53	0	0	-3.05732	5.06129
1	-2.0587	GO:0043277	M1	1	0	GO Biological Processes	19	apoptotic cell clearance	-2.0587	2.95242	3.08979	24155	46	1245	7	0.562249	0.211912	3685|3690|4035|7057|10347|51552|55113	ITGAV|ITGB3|LRP1|THBS1|ABCA7|RAB14|XKR8	-0.475123	0	43	0	0	-3.38096	9.7008
1	-2.0587	GO:0097720	M1	1	0	GO Biological Processes	19	calcineurin-mediated signaling	-2.0587	2.95242	3.08979	24155	46	1245	7	0.562249	0.211912	2932|3084|4773|5621|6818|10519|11123	GSK3B|NRG1|NFATC2|PRNP|SULT1A3|CIB1|RCAN3	-0.475123	0	106	1	1	-2.0587	2.95242
1	-2.0587	GO:1904646	M1	1	0	GO Biological Processes	19	cellular response to amyloid-beta	-2.0587	2.95242	3.08979	24155	46	1245	7	0.562249	0.211912	781|2358|2932|3676|4035|5621|7099	CACNA2D1|FPR2|GSK3B|ITGA4|LRP1|PRNP|TLR4	-0.475123	0	107	1	1	-2.0587	2.95242
1	-2.05195	GO:0018212	M1	1	0	GO Biological Processes	19	peptidyl-tyrosine modification	-2.05195	1.58596	2.63688	24155	367	1245	30	2.40964	0.434605	857|960|1196|1198|1436|1464|1636|2048|2241|2321|3084|3690|3717|4919|4921|5062|5156|5159|5168|5621|5781|5912|6259|6774|6868|7010|8829|10019|22853|84619	CAV1|CD44|CLK2|CLK3|CSF1R|CSPG4|ACE|EPHB2|FER|FLT1|NRG1|ITGB3|JAK2|ROR1|DDR2|PAK2|PDGFRA|PDGFRB|ENPP2|PRNP|PTPN11|RAP2B|RYK|STAT3|ADAM17|TEK|NRP1|SH2B3|LMTK2|ZGPAT	-0.469417	0	91	0	0	-2.28595	1.81632
1	-2.04202	GO:1990314	M1	1	0	GO Biological Processes	19	cellular response to insulin-like growth factor stimulus	-2.04202	6.4672	3.82411	24155	9	1245	3	0.240964	0.138953	1385|1398|2200	CREB1|CRK|FBN1	-0.467781	0	36	0	0	-3.55094	6.4672
1	-2.04358	GO:0010498	M1	1	0	GO Biological Processes	19	proteasomal protein catabolic process	-2.04358	1.50495	2.59656	24155	477	1245	37	2.97189	0.481261	550|857|2932|5708|6135|6400|6478|7327|7328|10134|11101|11315|23753|25852|25906|26233|51035|51608|54467|55139|55336|64682|64750|79016|79176|79718|80011|83737|83892|84236|90864|91544|93611|118424|130617|160418|253980	AUP1|CAV1|GSK3B|PSMD2|RPL11|SEL1L|SIAH2|UBE2G2|UBE2H|BCAP31|ATE1|PARK7|SDF2L1|ARMC8|ANAPC15|FBXL6|UBXN1|GET4|ANKIB1|ANKZF1|FBXL8|ANAPC1|SMURF2|DDA1|FBXL15|TBL1XR1|FAM192A|ITCH|KCTD10|RHBDD1|SPSB3|UBXN11|FBXO44|UBE2J2|ZFAND2B|TMTC3|KCTD13	-0.467781	0	39	0	0	-3.40714	1.7524
1	-2.04202	GO:2000343	M1	1	0	GO Biological Processes	19	positive regulation of chemokine (C-X-C motif) ligand 2 production	-2.04202	6.4672	3.82411	24155	9	1245	3	0.240964	0.138953	4035|4155|10631	LRP1|MBP|POSTN	-0.467781	0	47	0	0	-3.27953	14.5512
1	-2.04202	GO:0021612	M1	1	0	GO Biological Processes	19	facial nerve structural organization	-2.04202	6.4672	3.82411	24155	9	1245	3	0.240964	0.138953	8828|8829|91584	NRP2|NRP1|PLXNA4	-0.467781	0	60	0	0	-2.89862	11.641
1	-2.04202	GO:0021800	M1	1	0	GO Biological Processes	19	cerebral cortex tangential migration	-2.04202	6.4672	3.82411	24155	9	1245	3	0.240964	0.138953	8828|8829|9353	NRP2|NRP1|SLIT2	-0.467781	0	60	0	0	-2.89862	11.641
1	-2.04202	GO:0031441	M1	1	0	GO Biological Processes	19	negative regulation of mRNA 3'-end processing	-2.04202	6.4672	3.82411	24155	9	1245	3	0.240964	0.138953	580|904|56254	BARD1|CCNT1|RNF20	-0.467781	0	108	1	1	-2.04202	6.4672
1	-2.04202	GO:0048845	M1	1	0	GO Biological Processes	19	venous blood vessel morphogenesis	-2.04202	6.4672	3.82411	24155	9	1245	3	0.240964	0.138953	1948|57493|147372	EFNB2|HEG1|CCBE1	-0.467781	0	109	1	1	-2.04202	6.4672
1	-2.04202	GO:0002327	M1	1	0	GO Biological Processes	19	immature B cell differentiation	-2.04202	6.4672	3.82411	24155	9	1245	3	0.240964	0.138953	56262|96459|286410	LRRC8A|FNIP1|ATP11C	-0.467781	0	110	1	1	-2.04202	6.4672
1	-2.03911	GO:0046165	M1	1	0	GO Biological Processes	19	alcohol biosynthetic process	-2.03911	1.88473	2.73823	24155	175	1245	17	1.36546	0.328904	2246|4802|5028|5724|7108|10682|11315|23228|23541|27122|51360|51447|64801|84105|91734|120227|253430	FGF1|NFYC|P2RY1|PTAFR|TM7SF2|EBP|PARK7|PLCL2|SEC14L2|DKK3|MBTPS2|IP6K2|ARV1|PCBD2|IDI2|CYP2R1|IPMK	-0.465901	0	111	1	1	-2.03911	1.88473
1	-2.02995	GO:0010631	M1	1	0	GO Biological Processes	19	epithelial cell migration	-2.02995	1.5939	2.62036	24155	353	1245	29	2.32932	0.427476	382|1948|2113|2246|3091|3373|3690|4627|5168|5290|5781|6678|6868|7010|7057|8754|8828|8829|9353|9839|10000|10016|10519|23603|25960|57381|57608|79812|147372	ARF6|EFNB2|ETS1|FGF1|HIF1A|HYAL1|ITGB3|MYH9|ENPP2|PIK3CA|PTPN11|SPARC|ADAM17|TEK|THBS1|ADAM9|NRP2|NRP1|SLIT2|ZEB2|AKT3|PDCD6|CIB1|CORO1C|ADGRA2|RHOJ|JCAD|MMRN2|CCBE1	-0.465541	0	1	0	0	-8.54717	2.5568
1	-2.01776	GO:0010811	M1	1	0	GO Biological Processes	19	positive regulation of cell-substrate adhesion	-2.01776	2.08447	2.78781	24155	121	1245	13	1.04418	0.288087	1398|1842|2335|2932|3717|4811|6093|7010|8829|10085|10519|79812|151887	CRK|ECM2|FN1|GSK3B|JAK2|NID1|ROCK1|TEK|NRP1|EDIL3|CIB1|MMRN2|CCDC80	-0.465541	0	3	0	0	-7.12019	2.74713
1	-2.01776	GO:0017015	M1	1	0	GO Biological Processes	19	regulation of transforming growth factor beta receptor signaling pathway	-2.01776	2.08447	2.78781	24155	121	1245	13	1.04418	0.288087	857|2200|4015|5494|6498|6868|6935|7057|8516|27122|28996|64750|135228	CAV1|FBN1|LOX|PPM1A|SKIL|ADAM17|ZEB1|THBS1|ITGA8|DKK3|HIPK2|SMURF2|CD109	-0.465541	0	6	0	0	-5.85006	2.40119
1	-2.01968	GO:0034314	M1	1	0	GO Biological Processes	19	Arp2/3 complex-mediated actin nucleation	-2.01968	3.2336	3.1264	24155	36	1245	6	0.481928	0.196272	2764|5987|10097|10787|23191|374666	GMFB|TRIM27|ACTR2|NCKAP1|CYFIP1|WASH3P	-0.465541	0	16	0	0	-4.67817	3.2336
1	-2.02788	GO:0034109	M1	1	0	GO Biological Processes	19	homotypic cell-cell adhesion	-2.02788	2.36605	2.88852	24155	82	1245	10	0.803213	0.252976	87|3690|4627|5156|5291|5294|5912|7094|10019|55330	ACTN1|ITGB3|MYH9|PDGFRA|PIK3CB|PIK3CG|RAP2B|TLN1|SH2B3|BLOC1S4	-0.465541	0	22	0	0	-4.35418	3.2336
1	-2.03549	GO:0043624	M1	1	0	GO Biological Processes	19	cellular protein complex disassembly	-2.03549	1.77996	2.69671	24155	218	1245	20	1.60643	0.356311	3312|3796|4131|5195|6150|6711|10519|51069|54998|55052|57551|64951|64960|64976|64983|65993|89795|118487|128308|157922	HSPA8|KIF2A|MAP1B|PEX14|MRPL23|SPTBN1|CIB1|MRPL2|AURKAIP1|MRPL20|TAOK1|MRPS24|MRPS15|MRPL40|MRPL32|MRPS34|NAV3|CHCHD1|MRPL55|CAMSAP1	-0.465541	0	24	0	0	-4.09469	2.61595
1	-2.02936	GO:0006414	M1	1	0	GO Biological Processes	19	translational elongation	-2.02936	2.02703	2.77913	24155	134	1245	14	1.1245	0.29884	6150|6176|6181|51069|54998|55052|64951|64960|64976|64983|65993|85476|118487|128308	MRPL23|RPLP1|RPLP2|MRPL2|AURKAIP1|MRPL20|MRPS24|MRPS15|MRPL40|MRPL32|MRPS34|GFM1|CHCHD1|MRPL55	-0.465541	0	24	0	0	-4.09469	2.61595
1	-2.01776	GO:0048675	M1	1	0	GO Biological Processes	19	axon extension	-2.01776	2.08447	2.78781	24155	121	1245	13	1.04418	0.288087	2335|2932|4035|4131|5048|6259|6586|8828|8829|9353|23191|91584|118813	FN1|GSK3B|LRP1|MAP1B|PAFAH1B1|RYK|SLIT3|NRP2|NRP1|SLIT2|CYFIP1|PLXNA4|ZFYVE27	-0.465541	0	40	0	0	-3.40307	3.1584
1	-2.02517	GO:0032722	M1	1	0	GO Biological Processes	19	positive regulation of chemokine production	-2.02517	2.67608	2.97917	24155	58	1245	8	0.64257	0.226452	1436|3091|4035|4155|6868|7099|10631|22954	CSF1R|HIF1A|LRP1|MBP|ADAM17|TLR4|POSTN|TRIM32	-0.465541	0	47	0	0	-3.27953	14.5512
1	-2.01968	GO:0090218	M1	1	0	GO Biological Processes	19	positive regulation of lipid kinase activity	-2.01968	3.2336	3.1264	24155	36	1245	6	0.481928	0.196272	2321|2358|5156|5159|7010|30849	FLT1|FPR2|PDGFRA|PDGFRB|TEK|PIK3R4	-0.465541	0	64	0	0	-2.78407	8.31497
1	-2.02647	GO:0000302	M1	1	0	GO Biological Processes	19	response to reactive oxygen species	-2.02647	1.74864	2.67683	24155	233	1245	21	1.68675	0.364961	1398|1571|2113|2241|3373|3840|5074|5156|5159|5599|5660|5796|6546|8754|9131|9973|11315|23064|25824|55139|375748	CRK|CYP2E1|ETS1|FER|HYAL1|KPNA4|PAWR|PDGFRA|PDGFRB|MAPK8|PSAP|PTPRK|SLC8A1|ADAM9|AIFM1|CCS|PARK7|SETX|PRDX5|ANKZF1|ERCC6L2	-0.465541	0	74	0	0	-2.62301	1.74864
1	-2.01957	GO:0060759	M1	1	0	GO Biological Processes	19	regulation of response to cytokine stimulus	-2.01957	1.83805	2.70348	24155	190	1245	18	1.44578	0.338302	166|857|3091|3661|3665|3717|5048|5469|5781|6586|6868|7099|8996|9353|10019|22954|25939|54765	TLE5|CAV1|HIF1A|IRF3|IRF7|JAK2|PAFAH1B1|MED1|PTPN11|SLIT3|ADAM17|TLR4|NOL3|SLIT2|SH2B3|TRIM32|SAMHD1|TRIM44	-0.465541	0	75	0	0	-2.61953	3.10426
1	-2.01787	GO:0034204	M1	1	0	GO Biological Processes	19	lipid translocation	-2.01787	3.73108	3.24801	24155	26	1245	5	0.401606	0.179243	19|10347|23200|57205|286410	ABCA1|ABCA7|ATP11B|ATP10D|ATP11C	-0.465541	0	87	0	0	-2.42104	3.88032
1	-2.01967	GO:0120031	M1	1	0	GO Biological Processes	19	plasma membrane bounded cell projection assembly	-2.01967	1.44445	2.55012	24155	591	1245	44	3.53414	0.523292	382|755|857|1901|2012|2241|3797|4134|4638|4690|5048|5420|5912|6093|8481|8558|8829|9353|9530|9814|10097|10640|10787|23116|23191|23603|25970|27352|30845|49856|50807|51524|51668|51715|51735|55742|56683|79598|79969|121441|139818|152273|196527|200894	ARF6|CFAP410|CAV1|S1PR1|EMP1|FER|KIF3C|MAP4|MYLK|NCK1|PAFAH1B1|PODXL|RAP2B|ROCK1|OFD1|CDK10|NRP1|SLIT2|BAG4|SFI1|ACTR2|EXOC5|NCKAP1|TOGARAM1|CYFIP1|CORO1C|SH2B1|SGSM3|EHD3|WRAP73|ASAP1|TMEM138|HSPB11|RAB23|RAPGEF6|PARVA|CFAP298|CEP97|ATAT1|NEDD1|DOCK11|FGD5|ANO6|ARL13B	-0.465541	0	105	0	0	-2.07045	1.44788
1	-2.03708	GO:0070371	M1	1	0	GO Biological Processes	19	ERK1 and ERK2 cascade	-2.03708	1.62684	2.63976	24155	322	1245	27	2.16867	0.412811	673|960|1436|1652|1739|2048|2149|2321|2335|2358|3685|4035|5028|5156|5159|5469|5781|6818|7010|7099|8792|8829|9258|10347|10519|23410|57053	BRAF|CD44|CSF1R|DDT|DLG1|EPHB2|F2R|FLT1|FN1|FPR2|ITGAV|LRP1|P2RY1|PDGFRA|PDGFRB|MED1|PTPN11|SULT1A3|TEK|TLR4|TNFRSF11A|NRP1|MFHAS1|ABCA7|CIB1|SIRT3|CHRNA10	-0.465541	0	112	1	1	-2.03708	1.62684
1	-2.02788	GO:0022617	M1	1	0	GO Biological Processes	19	extracellular matrix disassembly	-2.02788	2.36605	2.88852	24155	82	1245	10	0.803213	0.252976	102|960|2113|4035|4241|4323|4324|4921|7077|7092	ADAM10|CD44|ETS1|LRP1|MELTF|MMP14|MMP15|DDR2|TIMP2|TLL1	-0.465541	0	113	1	1	-2.02788	4.56508
1	-2.02788	GO:0097581	M1	1	0	GO Biological Processes	19	lamellipodium organization	-2.02788	2.36605	2.88852	24155	82	1245	10	0.803213	0.252976	960|1901|2241|4690|5168|9353|10787|23191|23603|25970	CD44|S1PR1|FER|NCK1|ENPP2|SLIT2|NCKAP1|CYFIP1|CORO1C|SH2B1	-0.465541	0	114	1	1	-2.02788	2.36605
1	-2.02523	GO:0006644	M1	1	0	GO Biological Processes	19	phospholipid metabolic process	-2.02523	1.53052	2.59068	24155	431	1245	34	2.73092	0.46191	1436|2321|2358|3949|5048|5130|5156|5159|5168|5290|5291|5294|5295|6610|7010|8760|8818|9711|10809|10955|30849|51227|51447|51552|54344|84513|91734|114882|128486|142891|147011|160851|253430|619189	CSF1R|FLT1|FPR2|LDLR|PAFAH1B1|PCYT1A|PDGFRA|PDGFRB|ENPP2|PIK3CA|PIK3CB|PIK3CG|PIK3R1|SMPD2|TEK|CDS2|DPM2|RUBCN|STARD10|SERINC3|PIK3R4|PIGP|IP6K2|RAB14|DPM3|PLPP5|IDI2|OSBPL8|FITM2|SAMD8|PROCA1|DGKH|IPMK|SERINC4	-0.465541	0	115	1	1	-2.02523	1.53052
1	-2.02517	GO:0060997	M1	1	0	GO Biological Processes	19	dendritic spine morphogenesis	-2.02517	2.67608	2.97917	24155	58	1245	8	0.64257	0.226452	102|2048|4976|5048|10097|26037|50944|170506	ADAM10|EPHB2|OPA1|PAFAH1B1|ACTR2|SIPA1L1|SHANK1|DHX36	-0.465541	0	116	1	1	-2.02517	2.67608
1	-2.01968	GO:0071634	M1	1	0	GO Biological Processes	19	regulation of transforming growth factor beta production	-2.01968	3.2336	3.1264	24155	36	1245	6	0.481928	0.196272	1385|1386|2615|3091|3685|7057	CREB1|ATF2|LRRC32|HIF1A|ITGAV|THBS1	-0.465541	0	117	1	1	-2.01968	3.2336
1	-2.01787	GO:1905048	M1	1	0	GO Biological Processes	19	regulation of metallopeptidase activity	-2.01787	3.73108	3.24801	24155	26	1245	5	0.401606	0.179243	4155|6774|7077|8434|84168	MBP|STAT3|TIMP2|RECK|ANTXR1	-0.465541	0	118	1	1	-2.01787	3.73108
1	-2.01112	GO:2000811	M1	1	0	GO Biological Processes	19	negative regulation of anoikis	-2.01112	4.56508	3.42776	24155	17	1245	4	0.321285	0.160384	857|5290|6591|51651	CAV1|PIK3CA|SNAI2|PTRH2	-0.464722	0	56	0	0	-2.95158	8.31497
1	-2.01112	GO:0010715	M1	1	0	GO Biological Processes	19	regulation of extracellular matrix disassembly	-2.01112	4.56508	3.42776	24155	17	1245	4	0.321285	0.160384	2113|4035|4241|4921	ETS1|LRP1|MELTF|DDR2	-0.464722	0	113	0	0	-2.02788	4.56508
1	-2.01567	GO:0051897	M1	1	0	GO Biological Processes	19	positive regulation of protein kinase B signaling	-2.01567	1.87402	2.71287	24155	176	1245	17	1.36546	0.328904	2246|3084|5156|5159|5290|5291|5294|5295|5781|7010|7057|8822|9258|9530|11315|92140|114882	FGF1|NRG1|PDGFRA|PDGFRB|PIK3CA|PIK3CB|PIK3CG|PIK3R1|PTPN11|TEK|THBS1|FGF17|MFHAS1|BAG4|PARK7|MTDH|OSBPL8	-0.464722	0	119	1	1	-2.01567	1.87402
1	-2.01112	GO:0006744	M1	1	0	GO Biological Processes	19	ubiquinone biosynthetic process	-2.01112	4.56508	3.42776	24155	17	1245	4	0.321285	0.160384	51117|57017|79934|93058	COQ4|COQ9|COQ8B|COQ10A	-0.464722	0	120	1	1	-2.01112	4.56508
1	-2.01112	GO:1901663	M1	1	0	GO Biological Processes	19	quinone biosynthetic process	-2.01112	4.56508	3.42776	24155	17	1245	4	0.321285	0.160384	51117|57017|79934|93058	COQ4|COQ9|COQ8B|COQ10A	-0.464722	0	120	0	0	-2.01112	4.56508
1	-2.01112	GO:0033145	M1	1	0	GO Biological Processes	19	positive regulation of intracellular steroid hormone receptor signaling pathway	-2.01112	4.56508	3.42776	24155	17	1245	4	0.321285	0.160384	367|5469|10413|11315	AR|MED1|YAP1|PARK7	-0.464722	0	121	1	1	-2.01112	4.56508
1	-2.00831	GO:0071496	M1	1	0	GO Biological Processes	19	cellular response to external stimulus	-2.00831	1.60249	2.60426	24155	339	1245	28	2.249	0.420214	166|632|1981|3312|3676|4976|5028|5469|5599|5781|5899|6591|7099|7391|7442|8797|9131|10631|10641|10746|30849|53349|54434|57407|63895|64121|96459|729438	TLE5|BGLAP|EIF4G1|HSPA8|ITGA4|OPA1|P2RY1|MED1|MAPK8|PTPN11|RALB|SNAI2|TLR4|USF1|TRPV1|TNFRSF10A|AIFM1|POSTN|NPRL2|MAP3K2|PIK3R4|ZFYVE1|SSH1|NMRAL1|PIEZO2|RRAGC|FNIP1|CASTOR2	-0.462872	0	61	0	0	-2.86127	2.88402
1	-2.00653	GO:0048738	M1	1	0	GO Biological Processes	19	cardiac muscle tissue development	-2.00653	1.74117	2.65584	24155	234	1245	21	1.68675	0.364961	1385|1901|1948|3084|4729|5156|5159|5469|6443|6546|7528|8324|10052|10413|11149|23414|55897|57493|60485|80206|205428	CREB1|S1PR1|EFNB2|NRG1|NDUFV2|PDGFRA|PDGFRB|MED1|SGCB|SLC8A1|YY1|FZD7|GJC1|YAP1|BVES|ZFPM2|MESP1|HEG1|SAV1|FHOD3|DIPK2A	-0.462146	0	29	0	0	-3.94885	2.1056
1	-2.00471	GO:0001819	M1	1	0	GO Biological Processes	19	positive regulation of cytokine production	-2.00471	1.5053	2.56201	24155	464	1245	36	2.89157	0.474909	1385|1386|1436|1652|2149|3091|3098|3661|3665|3717|4035|4155|4791|5054|5295|5724|5781|6711|6774|6868|7057|7099|9188|10631|11315|22954|26060|26137|29126|55773|56919|57493|63906|114548|147372|170506	CREB1|ATF2|CSF1R|DDT|F2R|HIF1A|HK1|IRF3|IRF7|JAK2|LRP1|MBP|NFKB2|SERPINE1|PIK3R1|PTAFR|PTPN11|SPTBN1|STAT3|ADAM17|THBS1|TLR4|DDX21|POSTN|PARK7|TRIM32|APPL1|ZBTB20|CD274|TBC1D23|DHX33|HEG1|GPATCH3|NLRP3|CCBE1|DHX36	-0.462146	0	70	0	0	-2.72092	2.12205
1	-2.0049	GO:0006473	M1	1	0	GO Biological Processes	19	protein acetylation	-2.0049	1.7982	2.67548	24155	205	1245	19	1.5261	0.347431	1386|2932|6591|7994|9252|9329|10629|11315|26151|55167|55689|55929|57551|79969|80155|80218|84148|112869|122830	ATF2|GSK3B|SNAI2|KAT6A|RPS6KA5|GTF3C4|TAF6L|PARK7|NAT9|MSL2|YEATS2|DMAP1|TAOK1|ATAT1|NAA15|NAA50|KAT8|SGF29|NAA30	-0.462146	0	122	1	1	-2.0049	1.7982

## Sheet: YAP-correlated
_MEMBER_Input ID	_LogP_Input ID	GO	_PATTERN_	_RANK_	GiniIndex	Category	CategoryID	Description	LogP	Enrichment	Z-score	#TotalGeneInLibrary	#GeneInGO	#GeneInHitList	#GeneInGOAndHitList	%InGO	STDV %InGO	GeneID	Hits	Log(q-value)	EvidenceCutoff	GROUP_ID	FirstInGroupByEnrichment	FirstInGroupByLogP	BestLogPInGroup	BestEnrichmentInGroup	URL
1	-24.5586	GO:0051301	M1	1	0	GO Biological Processes	19	cell division	-24.5586	3.1906	12.7571	24155	598	1266	100	7.89889	0.758052	288|324|332|890|891|899|983|991|993|994|995|1019|1058|1164|3833|3925|4085|4628|4739|4751|4851|5300|5347|5581|5934|6651|6790|7005|7443|7813|8480|8914|9055|9094|9101|9133|9134|9183|9212|9232|9700|9735|10015|10376|10403|10460|10615|10907|11004|11065|11130|11339|22933|22974|23244|23354|23384|23397|23594|24137|26271|27338|28514|50624|51203|51433|51434|51529|54478|55143|55165|55559|55743|56241|57026|57…	ANK3|APC|BIRC5|CCNA2|CCNB1|CCNF|CDK1|CDC20|CDC25A|CDC25B|CDC25C|CDK4|CENPA|CKS2|KIFC1|STMN1|MAD2L1|MYH10|NEDD9|NEK2|NOTCH1|PIN1|PLK1|PRKCE|RBL2|SON|AURKA|TEAD3|VRK1|EVI5|RAE1|TIMELESS|PRC1|UNC119|USP8|CCNB2|CCNE2|ZW10|AURKB|PTTG1|ESPL1|KNTC1|PDCD6IP|TUBA1B|NDC80|TACC3|SPAG5|TXNL4A|KIF2C|UBE2C|ZWINT|OIP5|SIRT2|TPX2|PDS5A|HAUS5|SPECC1L|NCAPH|ORC6|KIF4A|FBXO5|UBE2S|DLL1|CUZD1|NUSAP1|ANAPC5|ANAPC7|AN…	-20.358	0	1	1	1	-24.5586	4.83189
1	-19.5429	GO:0000280	M1	1	0	GO Biological Processes	19	nuclear division	-19.5429	3.38887	11.4877	24155	411	1266	73	5.76619	0.655135	324|332|546|858|891|991|994|995|1164|2059|2175|2827|3833|4085|4605|4751|5300|5347|5719|5888|5889|5902|6790|7283|8438|9055|9088|9134|9183|9212|9232|9319|9555|9665|9700|9735|9985|10015|10403|10460|10615|11004|11065|11130|22933|22974|23244|23304|23397|24137|25788|26271|27338|29781|29893|29988|51203|51433|51529|55143|55165|57026|64151|79075|81620|83540|83903|84057|84722|146909|146956|192670|286151	APC|BIRC5|ATRX|CAV2|CCNB1|CDC20|CDC25B|CDC25C|CKS2|EPS8|FANCA|GPR3|KIFC1|MAD2L1|MYBL2|NEK2|PIN1|PLK1|PSMD13|RAD51|RAD51C|RANBP1|AURKA|TUBG1|RAD54L|PRC1|PKMYT1|CCNE2|ZW10|AURKB|PTTG1|TRIP13|MACROH2A1|MARF1|ESPL1|KNTC1|REC8|PDCD6IP|NDC80|TACC3|SPAG5|KIF2C|UBE2C|ZWINT|SIRT2|TPX2|PDS5A|UBR2|NCAPH|KIF4A|RAD54B|FBXO5|UBE2S|NCAPH2|PSMC3IP|SLC2A8|NUSAP1|ANAPC5|ANAPC11|CDCA8|CEP55|PDXP|NCAPG|DSCC1|CDT1|NU…	-15.6434	0	1	0	0	-24.5586	4.83189
1	-17.659	GO:0048285	M1	1	0	GO Biological Processes	19	organelle fission	-17.659	3.11679	10.6962	24155	453	1266	74	5.84518	0.659331	324|332|546|858|891|991|994|995|1164|2059|2175|2827|3833|4085|4605|4751|5300|5347|5719|5888|5889|5902|6790|7283|8438|9055|9088|9134|9183|9212|9232|9319|9555|9665|9700|9735|9985|10015|10403|10460|10615|11004|11065|11130|22933|22974|23244|23304|23397|24137|25788|26271|27338|29781|29893|29988|51203|51433|51529|55143|55165|57026|64151|79075|81620|83540|83903|84057|84722|113115|146909|146956|192670|28…	APC|BIRC5|ATRX|CAV2|CCNB1|CDC20|CDC25B|CDC25C|CKS2|EPS8|FANCA|GPR3|KIFC1|MAD2L1|MYBL2|NEK2|PIN1|PLK1|PSMD13|RAD51|RAD51C|RANBP1|AURKA|TUBG1|RAD54L|PRC1|PKMYT1|CCNE2|ZW10|AURKB|PTTG1|TRIP13|MACROH2A1|MARF1|ESPL1|KNTC1|REC8|PDCD6IP|NDC80|TACC3|SPAG5|KIF2C|UBE2C|ZWINT|SIRT2|TPX2|PDS5A|UBR2|NCAPH|KIF4A|RAD54B|FBXO5|UBE2S|NCAPH2|PSMC3IP|SLC2A8|NUSAP1|ANAPC5|ANAPC11|CDCA8|CEP55|PDXP|NCAPG|DSCC1|CDT1|NU…	-13.9356	0	1	0	0	-24.5586	4.83189
1	-17.3269	GO:0044772	M1	1	0	GO Biological Processes	19	mitotic cell cycle phase transition	-17.3269	2.79058	10.3378	24155	588	1266	86	6.79305	0.707196	324|581|596|890|891|899|983|991|993|994|995|997|1019|1032|1033|1164|1869|1956|1978|2059|2146|3276|3398|4085|4176|4751|4863|5111|5347|5427|5688|5691|5692|5694|5704|5719|5889|5934|5962|6241|6790|7283|7298|8065|8318|8636|8655|8945|9088|9133|9134|9183|9212|9319|9700|9702|9735|9833|10083|10217|10403|10460|11065|22933|22974|23354|23594|25942|25959|26057|26271|27338|29766|51347|51433|51434|51512|51529|5…	APC|BAX|BCL2|CCNA2|CCNB1|CCNF|CDK1|CDC20|CDC25A|CDC25B|CDC25C|CDC34|CDK4|CDKN2D|CDKN3|CKS2|E2F1|EGFR|EIF4EBP1|EPS8|EZH2|PRMT1|ID2|MAD2L1|MCM7|NEK2|NPAT|PCNA|PLK1|POLE2|PSMA7|PSMB3|PSMB4|PSMB6|PSMC4|PSMD13|RAD51C|RBL2|RDX|RRM2|AURKA|TUBG1|TYMS|CUL5|CDC45|SSNA1|DYNLL1|BTRC|PKMYT1|CCNB2|CCNE2|ZW10|AURKB|TRIP13|ESPL1|CEP57|KNTC1|MELK|USH1C|CTDSPL|NDC80|TACC3|UBE2C|SIRT2|TPX2|HAUS5|ORC6|SIN3A|KANK2|AN…	-13.7284	0	2	1	1	-17.3269	4.71106
1	-17.0747	GO:0140014	M1	1	0	GO Biological Processes	19	mitotic nuclear division	-17.0747	3.84443	11.0124	24155	268	1266	54	4.2654	0.567934	324|332|546|858|891|991|995|2059|3833|4085|4605|4751|5300|5347|5902|6790|7283|9055|9088|9183|9212|9232|9319|9555|9700|9735|10015|10403|10460|10615|11004|11065|11130|22933|22974|23244|23397|24137|26271|27338|29781|51203|51433|51529|55143|55165|57026|64151|79075|81620|83540|83903|84722|146909	APC|BIRC5|ATRX|CAV2|CCNB1|CDC20|CDC25C|EPS8|KIFC1|MAD2L1|MYBL2|NEK2|PIN1|PLK1|RANBP1|AURKA|TUBG1|PRC1|PKMYT1|ZW10|AURKB|PTTG1|TRIP13|MACROH2A1|ESPL1|KNTC1|PDCD6IP|NDC80|TACC3|SPAG5|KIF2C|UBE2C|ZWINT|SIRT2|TPX2|PDS5A|NCAPH|KIF4A|FBXO5|UBE2S|NCAPH2|NUSAP1|ANAPC5|ANAPC11|CDCA8|CEP55|PDXP|NCAPG|DSCC1|CDT1|NUF2|HASPIN|PSRC1|KIF18B	-13.6246	0	1	0	0	-24.5586	4.83189
1	-17.0471	GO:0007059	M1	1	0	GO Biological Processes	19	chromosome segregation	-17.0471	3.53329	10.7965	24155	324	1266	60	4.73934	0.597171	324|332|546|891|991|1663|2237|3833|4085|4751|5347|5889|7283|9055|9134|9183|9212|9232|9319|9555|9698|9700|9985|10015|10403|10460|10615|11004|11130|11339|22933|23244|23397|24137|26271|28989|29781|51203|51433|51529|55143|55165|55355|55839|57405|64151|79075|81620|83540|83903|84722|146909|146956|157313|157570|192670|220134|221150|387103|440081	APC|BIRC5|ATRX|CCNB1|CDC20|DDX11|FEN1|KIFC1|MAD2L1|NEK2|PLK1|RAD51C|TUBG1|PRC1|CCNE2|ZW10|AURKB|PTTG1|TRIP13|MACROH2A1|PUM1|ESPL1|REC8|PDCD6IP|NDC80|TACC3|SPAG5|KIF2C|ZWINT|OIP5|SIRT2|PDS5A|NCAPH|KIF4A|FBXO5|NTMT1|NCAPH2|NUSAP1|ANAPC5|ANAPC11|CDCA8|CEP55|HJURP|CENPN|SPC25|NCAPG|DSCC1|CDT1|NUF2|HASPIN|PSRC1|KIF18B|EME1|CDCA2|ESCO2|AGO4|SKA1|SKA3|CENPW|DDX12P	-13.6246	0	1	0	0	-24.5586	4.83189
1	-16.9636	GO:0000819	M1	1	0	GO Biological Processes	19	sister chromatid segregation	-16.9636	4.47182	11.3589	24155	192	1266	45	3.5545	0.520372	324|546|891|991|1663|2237|3833|4085|4751|5347|5889|7283|9055|9183|9212|9232|9319|9555|9700|9985|10015|10403|10460|10615|11004|11130|23244|23397|24137|26271|29781|51203|51433|51529|55143|55165|64151|79075|81620|83540|83903|84722|146909|157570|440081	APC|ATRX|CCNB1|CDC20|DDX11|FEN1|KIFC1|MAD2L1|NEK2|PLK1|RAD51C|TUBG1|PRC1|ZW10|AURKB|PTTG1|TRIP13|MACROH2A1|ESPL1|REC8|PDCD6IP|NDC80|TACC3|SPAG5|KIF2C|ZWINT|PDS5A|NCAPH|KIF4A|FBXO5|NCAPH2|NUSAP1|ANAPC5|ANAPC11|CDCA8|CEP55|NCAPG|DSCC1|CDT1|NUF2|HASPIN|PSRC1|KIF18B|ESCO2|DDX12P	-13.6081	0	1	0	0	-24.5586	4.83189
1	-16.8992	GO:0044770	M1	1	0	GO Biological Processes	19	cell cycle phase transition	-16.8992	2.69113	10.1236	24155	631	1266	89	7.03002	0.71851	324|581|596|890|891|899|983|991|993|994|995|997|1019|1032|1033|1164|1869|1956|1978|2059|2146|3276|3398|4085|4176|4751|4863|5111|5347|5427|5688|5691|5692|5694|5704|5719|5889|5934|5962|6241|6790|7283|7298|8065|8318|8636|8655|8914|8945|9088|9133|9134|9183|9212|9319|9555|9700|9702|9735|9833|10083|10217|10403|10460|11065|22933|22974|23354|23594|25942|25959|26057|26271|27338|29766|51347|51433|51434|515…	APC|BAX|BCL2|CCNA2|CCNB1|CCNF|CDK1|CDC20|CDC25A|CDC25B|CDC25C|CDC34|CDK4|CDKN2D|CDKN3|CKS2|E2F1|EGFR|EIF4EBP1|EPS8|EZH2|PRMT1|ID2|MAD2L1|MCM7|NEK2|NPAT|PCNA|PLK1|POLE2|PSMA7|PSMB3|PSMB4|PSMB6|PSMC4|PSMD13|RAD51C|RBL2|RDX|RRM2|AURKA|TUBG1|TYMS|CUL5|CDC45|SSNA1|DYNLL1|TIMELESS|BTRC|PKMYT1|CCNB2|CCNE2|ZW10|AURKB|TRIP13|MACROH2A1|ESPL1|CEP57|KNTC1|MELK|USH1C|CTDSPL|NDC80|TACC3|UBE2C|SIRT2|TPX2|HAUS5|…	-13.6018	0	2	0	0	-17.3269	4.71106
1	-16.0134	GO:0000070	M1	1	0	GO Biological Processes	19	mitotic sister chromatid segregation	-16.0134	4.83189	11.2191	24155	154	1266	39	3.08057	0.485628	324|546|891|991|3833|4085|4751|5347|7283|9055|9183|9212|9232|9319|9555|9700|10015|10403|10460|10615|11004|11130|23244|23397|24137|26271|29781|51203|51433|51529|55143|55165|64151|79075|81620|83540|83903|84722|146909	APC|ATRX|CCNB1|CDC20|KIFC1|MAD2L1|NEK2|PLK1|TUBG1|PRC1|ZW10|AURKB|PTTG1|TRIP13|MACROH2A1|ESPL1|PDCD6IP|NDC80|TACC3|SPAG5|KIF2C|ZWINT|PDS5A|NCAPH|KIF4A|FBXO5|NCAPH2|NUSAP1|ANAPC5|ANAPC11|CDCA8|CEP55|NCAPG|DSCC1|CDT1|NUF2|HASPIN|PSRC1|KIF18B	-12.7671	0	1	0	0	-24.5586	4.83189
1	-15.1552	GO:0007346	M1	1	0	GO Biological Processes	19	regulation of mitotic cell cycle	-15.1552	2.54012	9.44225	24155	661	1266	88	6.95103	0.714765	324|429|440|546|581|596|858|891|983|991|993|994|995|1019|1032|1164|1869|1956|1978|2146|3265|3276|3398|4085|4751|5111|5300|5347|5688|5691|5692|5694|5704|5719|5889|5902|5934|5962|6790|7283|8318|8480|8636|8655|8945|9088|9183|9212|9232|9319|9555|9700|9702|9735|10015|10217|10403|10460|11065|11130|22933|22974|23354|25942|25959|26057|26271|29766|51203|51347|51433|51434|51512|51529|55559|55743|57026|7903…	APC|ASCL1|ASNS|ATRX|BAX|BCL2|CAV2|CCNB1|CDK1|CDC20|CDC25A|CDC25B|CDC25C|CDK4|CDKN2D|CKS2|E2F1|EGFR|EIF4EBP1|EZH2|HRAS|PRMT1|ID2|MAD2L1|NEK2|PCNA|PIN1|PLK1|PSMA7|PSMB3|PSMB4|PSMB6|PSMC4|PSMD13|RAD51C|RANBP1|RBL2|RDX|AURKA|TUBG1|CDC45|RAE1|SSNA1|DYNLL1|BTRC|PKMYT1|ZW10|AURKB|PTTG1|TRIP13|MACROH2A1|ESPL1|CEP57|KNTC1|PDCD6IP|CTDSPL|NDC80|TACC3|UBE2C|ZWINT|SIRT2|TPX2|HAUS5|SIN3A|KANK2|ANKRD17|FBXO5|TM…	-11.9546	0	2	0	0	-17.3269	4.71106
1	-14.006	GO:0098813	M1	1	0	GO Biological Processes	19	nuclear chromosome segregation	-14.006	3.52796	9.73157	24155	265	1266	49	3.87046	0.542117	324|546|891|991|1663|2237|3833|4085|4751|5347|5889|7283|9055|9134|9183|9212|9232|9319|9555|9700|9985|10015|10403|10460|10615|11004|11130|22933|23244|23397|24137|26271|29781|51203|51433|51529|55143|55165|64151|79075|81620|83540|83903|84722|146909|146956|157570|192670|440081	APC|ATRX|CCNB1|CDC20|DDX11|FEN1|KIFC1|MAD2L1|NEK2|PLK1|RAD51C|TUBG1|PRC1|CCNE2|ZW10|AURKB|PTTG1|TRIP13|MACROH2A1|ESPL1|REC8|PDCD6IP|NDC80|TACC3|SPAG5|KIF2C|ZWINT|SIRT2|PDS5A|NCAPH|KIF4A|FBXO5|NCAPH2|NUSAP1|ANAPC5|ANAPC11|CDCA8|CEP55|NCAPG|DSCC1|CDT1|NUF2|HASPIN|PSRC1|KIF18B|EME1|ESCO2|AGO4|DDX12P	-10.8469	0	1	0	0	-24.5586	4.83189
1	-13.2963	GO:0006260	M1	1	0	GO Biological Processes	19	DNA replication	-13.2963	3.38735	9.38125	24155	276	1266	49	3.87046	0.542117	546|890|983|997|1663|1956|2237|3060|3265|4176|4784|5111|5427|5763|5888|5937|5982|5984|6241|8318|8914|9134|9401|9768|9837|10036|10189|10535|10721|11284|23244|23594|25942|26057|26271|29803|51426|51659|57418|79075|80119|80174|81620|84897|92675|146956|157570|222229|259282	ATRX|CCNA2|CDK1|CDC34|DDX11|EGFR|FEN1|HCRT|HRAS|MCM7|NFIX|PCNA|POLE2|PTMS|RAD51|RBMS1|RFC2|RFC4|RRM2|CDC45|TIMELESS|CCNE2|RECQL4|PCLAF|GINS1|CHAF1A|ALYREF|RNASEH2A|POLQ|PNKP|PDS5A|ORC6|SIN3A|ANKRD17|FBXO5|REPIN1|POLK|GINS2|WDR18|DSCC1|PIF1|DBF4B|CDT1|TBRG1|DTD1|EME1|ESCO2|LRWD1|BOD1L1	-10.1749	0	3	1	1	-13.2963	6.67792
1	-12.9566	GO:0000226	M1	1	0	GO Biological Processes	19	microtubule cytoskeleton organization	-12.9566	2.5372	8.68752	24155	564	1266	75	5.92417	0.663492	324|332|546|891|899|983|991|1058|3833|3925|4085|4605|4751|5300|5347|5902|6314|6651|6790|7280|7283|8409|8480|8631|9055|9148|9183|9212|9648|9700|9702|9748|9768|10015|10048|10253|10376|10381|10403|10460|10615|11004|22974|23354|23387|24137|25886|26271|28989|51203|55559|57405|57606|65999|79187|79929|80128|83540|84446|84612|84722|85458|89958|91978|93323|115106|124602|140609|146909|220134|221150|253012|…	APC|BIRC5|ATRX|CCNB1|CCNF|CDK1|CDC20|CENPA|KIFC1|STMN1|MAD2L1|MYBL2|NEK2|PIN1|PLK1|RANBP1|ATXN7|SON|AURKA|TUBB2A|TUBG1|UXT|RAE1|SKAP1|PRC1|NEURL1|ZW10|AURKB|GCC2|ESPL1|CEP57|SLK|PCLAF|PDCD6IP|RANBP9|SPRY2|TUBA1B|TUBB3|NDC80|TACC3|SPAG5|KIF2C|TPX2|HAUS5|SIK3|KIF4A|POC1A|FBXO5|NTMT1|NUSAP1|HAUS7|SPC25|SLAIN2|LRRC61|FSD1|MAP6D1|TRIM46|NUF2|BRSK1|PARD6B|PSRC1|DIXDC1|SAPCD2|TPGS1|HAUS8|HAUS1|KIF19|NEK…	-9.86997	0	1	0	0	-24.5586	4.83189
1	-12.3247	GO:0010564	M1	1	0	GO Biological Processes	19	regulation of cell cycle process	-12.3247	2.22477	8.22616	24155	789	1266	92	7.26698	0.729588	324|546|581|596|858|891|899|983|991|993|994|995|1019|1032|1663|1869|1956|2146|2237|2827|3276|3398|3642|4085|4751|4760|5111|5300|5347|5581|5688|5691|5692|5694|5704|5719|5888|5889|5902|5934|5962|6241|6790|7283|8318|8409|8480|8636|8655|8945|9055|9088|9183|9212|9232|9319|9555|9700|9702|9735|10015|10217|10403|10460|10615|11065|22933|22974|23354|25886|25942|25959|26057|26271|29766|51203|51347|51433|514…	APC|ATRX|BAX|BCL2|CAV2|CCNB1|CCNF|CDK1|CDC20|CDC25A|CDC25B|CDC25C|CDK4|CDKN2D|DDX11|E2F1|EGFR|EZH2|FEN1|GPR3|PRMT1|ID2|INSM1|MAD2L1|NEK2|NEUROD1|PCNA|PIN1|PLK1|PRKCE|PSMA7|PSMB3|PSMB4|PSMB6|PSMC4|PSMD13|RAD51|RAD51C|RANBP1|RBL2|RDX|RRM2|AURKA|TUBG1|CDC45|UXT|RAE1|SSNA1|DYNLL1|BTRC|PRC1|PKMYT1|ZW10|AURKB|PTTG1|TRIP13|MACROH2A1|ESPL1|CEP57|KNTC1|PDCD6IP|CTDSPL|NDC80|TACC3|SPAG5|UBE2C|SIRT2|TPX2|HAU…	-9.27027	0	2	0	0	-17.3269	4.71106
1	-12.2217	GO:1901990	M1	1	0	GO Biological Processes	19	regulation of mitotic cell cycle phase transition	-12.2217	2.70727	8.53917	24155	444	1266	63	4.9763	0.611157	324|581|596|891|983|991|993|994|995|1019|1032|1869|1956|2146|3276|3398|4085|4751|5111|5347|5688|5691|5692|5694|5704|5719|5889|5934|5962|6790|7283|8318|8636|8655|8945|9183|9212|9319|9700|9702|9735|10217|10403|11065|22933|22974|23354|25942|25959|26057|26271|29766|51347|51433|51434|51512|51529|55559|80174|81620|84446|93323|115106	APC|BAX|BCL2|CCNB1|CDK1|CDC20|CDC25A|CDC25B|CDC25C|CDK4|CDKN2D|E2F1|EGFR|EZH2|PRMT1|ID2|MAD2L1|NEK2|PCNA|PLK1|PSMA7|PSMB3|PSMB4|PSMB6|PSMC4|PSMD13|RAD51C|RBL2|RDX|AURKA|TUBG1|CDC45|SSNA1|DYNLL1|BTRC|ZW10|AURKB|TRIP13|ESPL1|CEP57|KNTC1|CTDSPL|NDC80|UBE2C|SIRT2|TPX2|HAUS5|SIN3A|KANK2|ANKRD17|FBXO5|TMOD3|TAOK3|ANAPC5|ANAPC7|GTSE1|ANAPC11|HAUS7|DBF4B|CDT1|BRSK1|HAUS8|HAUS1	-9.19718	0	2	0	0	-17.3269	4.71106
1	-11.7349	GO:1902850	M1	1	0	GO Biological Processes	19	microtubule cytoskeleton organization involved in mitosis	-11.7349	4.41398	9.31999	24155	134	1266	31	2.44866	0.434374	332|891|991|1058|3833|3925|4085|4605|4751|5347|6790|7283|8480|9055|9183|9212|9700|10015|10253|10403|10460|22974|24137|25886|51203|57405|79187|83540|84722|89958|284403	BIRC5|CCNB1|CDC20|CENPA|KIFC1|STMN1|MAD2L1|MYBL2|NEK2|PLK1|AURKA|TUBG1|RAE1|PRC1|ZW10|AURKB|ESPL1|PDCD6IP|SPRY2|NDC80|TACC3|TPX2|KIF4A|POC1A|NUSAP1|SPC25|FSD1|NUF2|PSRC1|SAPCD2|WDR62	-8.73839	0	1	0	0	-24.5586	4.83189
1	-11.6573	GO:1901987	M1	1	0	GO Biological Processes	19	regulation of cell cycle phase transition	-11.6573	2.58372	8.24237	24155	480	1266	65	5.13428	0.620265	324|581|596|891|983|991|993|994|995|1019|1032|1869|1956|2146|3276|3398|4085|4751|5111|5347|5688|5691|5692|5694|5704|5719|5889|5934|5962|6790|7283|8318|8636|8655|8945|9183|9212|9319|9555|9700|9702|9735|10217|10403|11065|22933|22974|23354|25942|25959|26057|26271|29766|51347|51433|51434|51512|51529|55559|56241|80174|81620|84446|93323|115106	APC|BAX|BCL2|CCNB1|CDK1|CDC20|CDC25A|CDC25B|CDC25C|CDK4|CDKN2D|E2F1|EGFR|EZH2|PRMT1|ID2|MAD2L1|NEK2|PCNA|PLK1|PSMA7|PSMB3|PSMB4|PSMB6|PSMC4|PSMD13|RAD51C|RBL2|RDX|AURKA|TUBG1|CDC45|SSNA1|DYNLL1|BTRC|ZW10|AURKB|TRIP13|MACROH2A1|ESPL1|CEP57|KNTC1|CTDSPL|NDC80|UBE2C|SIRT2|TPX2|HAUS5|SIN3A|KANK2|ANKRD17|FBXO5|TMOD3|TAOK3|ANAPC5|ANAPC7|GTSE1|ANAPC11|HAUS7|SUSD2|DBF4B|CDT1|BRSK1|HAUS8|HAUS1	-8.6872	0	2	0	0	-17.3269	4.71106
1	-11.1217	GO:0007017	M1	1	0	GO Biological Processes	19	microtubule-based process	-11.1217	2.1727	7.74651	24155	764	1266	87	6.87204	0.710994	324|332|546|891|899|983|991|1058|1729|3800|3833|3925|4085|4605|4751|5300|5347|5874|5902|6314|6651|6790|7280|7283|8409|8480|8631|8636|8655|9001|9055|9148|9183|9212|9648|9700|9702|9748|9768|10015|10048|10253|10376|10381|10403|10460|10615|11004|22974|23354|23387|24137|25886|26271|28989|51203|51512|55559|57405|57606|65999|79187|79443|79659|79929|80128|80208|83540|84446|84612|84722|85458|89958|90990|9…	APC|BIRC5|ATRX|CCNB1|CCNF|CDK1|CDC20|CENPA|DIAPH1|KIF5C|KIFC1|STMN1|MAD2L1|MYBL2|NEK2|PIN1|PLK1|RAB27B|RANBP1|ATXN7|SON|AURKA|TUBB2A|TUBG1|UXT|RAE1|SKAP1|SSNA1|DYNLL1|HAP1|PRC1|NEURL1|ZW10|AURKB|GCC2|ESPL1|CEP57|SLK|PCLAF|PDCD6IP|RANBP9|SPRY2|TUBA1B|TUBB3|NDC80|TACC3|SPAG5|KIF2C|TPX2|HAUS5|SIK3|KIF4A|POC1A|FBXO5|NTMT1|NUSAP1|GTSE1|HAUS7|SPC25|SLAIN2|LRRC61|FSD1|FYCO1|DYNC2H1|MAP6D1|TRIM46|SPG11|N…	-8.17638	0	1	0	0	-24.5586	4.83189
1	-10.3486	GO:0007051	M1	1	0	GO Biological Processes	19	spindle organization	-10.3486	3.57108	8.30078	24155	187	1266	35	2.76461	0.4608	332|546|891|991|3833|3925|4605|4751|5347|6790|7283|8480|9055|9212|9700|10015|10403|10460|10615|22974|23354|24137|25886|26271|28989|55559|57405|79187|83540|84722|93323|115106|140609|284403|387103	BIRC5|ATRX|CCNB1|CDC20|KIFC1|STMN1|MYBL2|NEK2|PLK1|AURKA|TUBG1|RAE1|PRC1|AURKB|ESPL1|PDCD6IP|NDC80|TACC3|SPAG5|TPX2|HAUS5|KIF4A|POC1A|FBXO5|NTMT1|HAUS7|SPC25|FSD1|NUF2|PSRC1|HAUS8|HAUS1|NEK7|WDR62|CENPW	-7.42674	0	1	0	0	-24.5586	4.83189
1	-10.2453	GO:0006281	M1	1	0	GO Biological Processes	19	DNA repair	-10.2453	2.34616	7.53151	24155	553	1266	68	5.37125	0.633625	143|546|983|1032|1054|1408|1663|1956|2074|2175|2189|2237|2873|3014|3148|4176|4521|4862|5111|5427|5437|5439|5440|5531|5886|5888|5889|5982|5984|7979|8318|8363|8438|8914|9232|9319|9401|9665|9768|9985|10036|10445|10535|10635|10721|10856|11284|23244|23583|25788|26122|29089|29844|51347|51426|51659|55010|55135|57646|64708|79035|80119|121642|146956|149840|157570|259282|375757	PARP4|ATRX|CDK1|CDKN2D|CEBPG|CRY2|DDX11|EGFR|ERCC6|FANCA|FANCG|FEN1|GPS1|H2AX|HMGB2|MCM7|NUDT1|NPAS2|PCNA|POLE2|POLR2H|POLR2J|POLR2K|PPP4C|RAD23A|RAD51|RAD51C|RFC2|RFC4|SEM1|CDC45|H4C11|RAD54L|TIMELESS|PTTG1|TRIP13|RECQL4|MARF1|PCLAF|REC8|CHAF1A|MCRS1|RNASEH2A|RAD51AP1|POLQ|RUVBL2|PNKP|PDS5A|SMUG1|RAD54B|EPC2|UBE2T|TFPT|TAOK3|POLK|GINS2|PARPBP|WRAP53|USP28|COPS7B|NABP2|PIF1|ALKBH2|EME1|SHLD1|ESCO…	-7.3457	0	4	1	1	-10.2453	3.39196
1	-10.165	GO:0051321	M1	1	0	GO Biological Processes	19	meiotic cell cycle	-10.165	3.14165	7.98901	24155	249	1266	41	3.23855	0.497519	546|991|993|994|995|1164|2175|2827|3014|4751|5347|5719|5888|5889|6790|7283|8438|9088|9134|9183|9232|9319|9665|9700|9724|9985|10179|22933|23304|23397|25788|26271|29781|29893|29988|51207|83540|84057|146956|192670|286151	ATRX|CDC20|CDC25A|CDC25B|CDC25C|CKS2|FANCA|GPR3|H2AX|NEK2|PLK1|PSMD13|RAD51|RAD51C|AURKA|TUBG1|RAD54L|PKMYT1|CCNE2|ZW10|PTTG1|TRIP13|MARF1|ESPL1|UTP14C|REC8|RBM7|SIRT2|UBR2|NCAPH|RAD54B|FBXO5|NCAPH2|PSMC3IP|SLC2A8|DUSP13|NUF2|MND1|EME1|AGO4|FBXO43	-7.28667	0	5	1	1	-10.165	3.97495
1	-10.0764	GO:0051983	M1	1	0	GO Biological Processes	19	regulation of chromosome segregation	-10.0764	4.63101	8.68498	24155	103	1266	25	1.97472	0.391026	324|546|891|991|1663|2237|4085|4751|5347|9183|9212|9232|9319|9555|9698|9700|10403|10460|10615|11004|22933|26271|51433|51529|81620	APC|ATRX|CCNB1|CDC20|DDX11|FEN1|MAD2L1|NEK2|PLK1|ZW10|AURKB|PTTG1|TRIP13|MACROH2A1|PUM1|ESPL1|NDC80|TACC3|SPAG5|KIF2C|SIRT2|FBXO5|ANAPC5|ANAPC11|CDT1	-7.2182	0	6	1	1	-10.0764	6.73404
1	-9.65394	GO:1903046	M1	1	0	GO Biological Processes	19	meiotic cell cycle process	-9.65394	3.4506	7.93309	24155	188	1266	34	2.68562	0.454354	546|991|993|994|995|1164|2175|2827|5347|5719|5888|5889|6790|7283|8438|9134|9232|9319|9665|9700|9985|22933|23304|23397|25788|26271|29781|29893|29988|83540|84057|146956|192670|286151	ATRX|CDC20|CDC25A|CDC25B|CDC25C|CKS2|FANCA|GPR3|PLK1|PSMD13|RAD51|RAD51C|AURKA|TUBG1|RAD54L|CCNE2|PTTG1|TRIP13|MARF1|ESPL1|REC8|SIRT2|UBR2|NCAPH|RAD54B|FBXO5|NCAPH2|PSMC3IP|SLC2A8|NUF2|MND1|EME1|AGO4|FBXO43	-6.81509	0	5	0	0	-10.165	3.97495
1	-9.46648	GO:0071103	M1	1	0	GO Biological Processes	19	DNA conformation change	-9.46648	2.74235	7.46044	24155	327	1266	47	3.71248	0.531374	546|891|983|1058|1106|1663|2074|3014|3148|4176|5888|5982|5984|8318|8345|8352|8363|8438|8968|8971|9401|9555|9837|10036|10721|10856|11339|23397|25788|29781|29855|51203|51659|55355|55723|55839|55870|64151|64946|79019|79075|79682|80119|80205|387103|401541|440081	ATRX|CCNB1|CDK1|CENPA|CHD2|DDX11|ERCC6|H2AX|HMGB2|MCM7|RAD51|RFC2|RFC4|CDC45|H2BC9|H3C3|H4C11|RAD54L|H3C7|H1-10|RECQL4|MACROH2A1|GINS1|CHAF1A|POLQ|RUVBL2|OIP5|NCAPH|RAD54B|NCAPH2|UBN1|NUSAP1|GINS2|HJURP|ASF1B|CENPN|ASH1L|NCAPG|CENPH|CENPM|DSCC1|CENPU|PIF1|CHD9|CENPW|CENPP|DDX12P	-6.64611	0	7	1	1	-9.46648	6.35993
1	-9.24571	GO:0045787	M1	1	0	GO Biological Processes	19	positive regulation of cell cycle	-9.24571	2.55051	7.25052	24155	389	1266	52	4.10742	0.557777	429|440|546|581|891|983|993|994|995|1019|1164|1663|1869|1956|1978|2146|2237|3276|3398|3642|4085|5111|5581|5886|5889|5902|5934|5962|6790|8318|8941|9212|9555|9700|10370|10403|10615|11065|22933|25886|25942|26057|26271|29766|51203|51433|51512|51529|80174|81620|84722|221477	ASCL1|ASNS|ATRX|BAX|CCNB1|CDK1|CDC25A|CDC25B|CDC25C|CDK4|CKS2|DDX11|E2F1|EGFR|EIF4EBP1|EZH2|FEN1|PRMT1|ID2|INSM1|MAD2L1|PCNA|PRKCE|RAD23A|RAD51C|RANBP1|RBL2|RDX|AURKA|CDC45|CDK5R2|AURKB|MACROH2A1|ESPL1|CITED2|NDC80|SPAG5|UBE2C|SIRT2|POC1A|SIN3A|ANKRD17|FBXO5|TMOD3|NUSAP1|ANAPC5|GTSE1|ANAPC11|DBF4B|CDT1|PSRC1|C6orf89	-6.44307	0	8	1	1	-9.24571	7.06658
1	-9.21898	GO:0007088	M1	1	0	GO Biological Processes	19	regulation of mitotic nuclear division	-9.21898	3.56309	7.7931	24155	166	1266	31	2.44866	0.434374	324|546|858|891|991|995|4085|4751|5300|5347|5902|6790|9088|9183|9212|9232|9319|9555|9700|9735|10015|10403|10460|11065|22933|26271|51203|51433|51529|57026|81620	APC|ATRX|CAV2|CCNB1|CDC20|CDC25C|MAD2L1|NEK2|PIN1|PLK1|RANBP1|AURKA|PKMYT1|ZW10|AURKB|PTTG1|TRIP13|MACROH2A1|ESPL1|KNTC1|PDCD6IP|NDC80|TACC3|UBE2C|SIRT2|FBXO5|NUSAP1|ANAPC5|ANAPC11|PDXP|CDT1	-6.43338	0	6	0	0	-10.0764	6.73404
1	-8.92005	GO:0051783	M1	1	0	GO Biological Processes	19	regulation of nuclear division	-8.92005	3.31386	7.53048	24155	190	1266	33	2.60664	0.447804	324|546|858|891|991|995|2827|4085|4751|5300|5347|5902|6790|9088|9183|9212|9232|9319|9555|9700|9735|10015|10403|10460|11065|22933|26271|51203|51433|51529|57026|81620|286151	APC|ATRX|CAV2|CCNB1|CDC20|CDC25C|GPR3|MAD2L1|NEK2|PIN1|PLK1|RANBP1|AURKA|PKMYT1|ZW10|AURKB|PTTG1|TRIP13|MACROH2A1|ESPL1|KNTC1|PDCD6IP|NDC80|TACC3|UBE2C|SIRT2|FBXO5|NUSAP1|ANAPC5|ANAPC11|PDXP|CDT1|FBXO43	-6.15084	0	6	0	0	-10.0764	6.73404
1	-8.77332	GO:0007052	M1	1	0	GO Biological Processes	19	mitotic spindle organization	-8.77332	4.20105	7.87739	24155	109	1266	24	1.89573	0.38328	332|891|991|3833|3925|4605|4751|5347|6790|7283|8480|9055|9212|10015|10403|10460|22974|24137|25886|57405|79187|83540|84722|284403	BIRC5|CCNB1|CDC20|KIFC1|STMN1|MYBL2|NEK2|PLK1|AURKA|TUBG1|RAE1|PRC1|AURKB|PDCD6IP|NDC80|TACC3|TPX2|KIF4A|POC1A|SPC25|FSD1|NUF2|PSRC1|WDR62	-6.03243	0	1	0	0	-24.5586	4.83189
1	-8.75589	GO:0006261	M1	1	0	GO Biological Processes	19	DNA-dependent DNA replication	-8.75589	3.59295	7.59166	24155	154	1266	29	2.29068	0.420468	546|997|1663|2237|4176|5111|5427|5888|5982|5984|8318|8914|9134|9401|9837|10189|10535|10721|11284|23594|26271|51659|57418|79075|80174|81620|146956|222229|259282	ATRX|CDC34|DDX11|FEN1|MCM7|PCNA|POLE2|RAD51|RFC2|RFC4|CDC45|TIMELESS|CCNE2|RECQL4|GINS1|ALYREF|RNASEH2A|POLQ|PNKP|ORC6|FBXO5|GINS2|WDR18|DSCC1|DBF4B|CDT1|EME1|LRWD1|BOD1L1	-6.03243	0	3	0	0	-13.2963	6.67792
1	-8.7702	GO:0090068	M1	1	0	GO Biological Processes	19	positive regulation of cell cycle process	-8.7702	2.75312	7.16161	24155	298	1266	43	3.39652	0.509093	546|581|891|983|993|994|995|1019|1663|1869|1956|2146|2237|3276|3398|3642|4085|5111|5581|5889|5902|5934|5962|6790|8318|9212|9555|9700|10403|10615|11065|22933|25886|25942|26057|26271|29766|51203|51433|51512|51529|80174|81620	ATRX|BAX|CCNB1|CDK1|CDC25A|CDC25B|CDC25C|CDK4|DDX11|E2F1|EGFR|EZH2|FEN1|PRMT1|ID2|INSM1|MAD2L1|PCNA|PRKCE|RAD51C|RANBP1|RBL2|RDX|AURKA|CDC45|AURKB|MACROH2A1|ESPL1|NDC80|SPAG5|UBE2C|SIRT2|POC1A|SIN3A|ANKRD17|FBXO5|TMOD3|NUSAP1|ANAPC5|GTSE1|ANAPC11|DBF4B|CDT1	-6.03243	0	8	0	0	-9.24571	7.06658
1	-8.73168	GO:0044839	M1	1	0	GO Biological Processes	19	cell cycle G2/M phase transition	-8.73168	2.86914	7.20911	24155	266	1266	40	3.15956	0.491614	890|891|983|993|994|995|1019|4751|5347|5688|5691|5692|5694|5704|5719|5889|6790|7283|8636|8655|8945|9088|9133|9212|9555|9702|9833|10083|22974|23354|25942|26271|51347|51512|55559|80174|84446|84962|93323|115106	CCNA2|CCNB1|CDK1|CDC25A|CDC25B|CDC25C|CDK4|NEK2|PLK1|PSMA7|PSMB3|PSMB4|PSMB6|PSMC4|PSMD13|RAD51C|AURKA|TUBG1|SSNA1|DYNLL1|BTRC|PKMYT1|CCNB2|AURKB|MACROH2A1|CEP57|MELK|USH1C|TPX2|HAUS5|SIN3A|FBXO5|TAOK3|GTSE1|HAUS7|DBF4B|BRSK1|AJUBA|HAUS8|HAUS1	-6.02247	0	2	0	0	-17.3269	4.71106
1	-8.61056	GO:0000086	M1	1	0	GO Biological Processes	19	G2/M transition of mitotic cell cycle	-8.61056	2.93535	7.19009	24155	247	1266	38	3.00158	0.479557	890|891|983|993|994|995|1019|4751|5347|5688|5691|5692|5694|5704|5719|5889|6790|7283|8636|8655|8945|9088|9133|9212|9702|9833|10083|22974|23354|25942|26271|51347|55559|80174|84446|84962|93323|115106	CCNA2|CCNB1|CDK1|CDC25A|CDC25B|CDC25C|CDK4|NEK2|PLK1|PSMA7|PSMB3|PSMB4|PSMB6|PSMC4|PSMD13|RAD51C|AURKA|TUBG1|SSNA1|DYNLL1|BTRC|PKMYT1|CCNB2|AURKB|CEP57|MELK|USH1C|TPX2|HAUS5|SIN3A|FBXO5|TAOK3|HAUS7|DBF4B|BRSK1|AJUBA|HAUS8|HAUS1	-5.91513	0	2	0	0	-17.3269	4.71106
1	-8.43536	GO:0033045	M1	1	0	GO Biological Processes	19	regulation of sister chromatid segregation	-8.43536	4.76994	7.94319	24155	80	1266	20	1.57978	0.350448	324|546|891|991|1663|2237|4085|5347|9183|9212|9232|9319|9555|9700|10403|10460|26271|51433|51529|81620	APC|ATRX|CCNB1|CDC20|DDX11|FEN1|MAD2L1|PLK1|ZW10|AURKB|PTTG1|TRIP13|MACROH2A1|ESPL1|NDC80|TACC3|FBXO5|ANAPC5|ANAPC11|CDT1	-5.7533	0	6	0	0	-10.0764	6.73404
1	-8.33398	GO:0031145	M1	1	0	GO Biological Processes	19	anaphase-promoting complex-dependent catabolic process	-8.33398	4.71106	7.86799	24155	81	1266	20	1.57978	0.350448	891|983|991|4085|5347|5688|5691|5692|5694|5704|5719|6790|9212|9232|11065|26271|27338|51433|51434|51529	CCNB1|CDK1|CDC20|MAD2L1|PLK1|PSMA7|PSMB3|PSMB4|PSMB6|PSMC4|PSMD13|AURKA|AURKB|PTTG1|UBE2C|FBXO5|UBE2S|ANAPC5|ANAPC7|ANAPC11	-5.66488	0	2	0	0	-17.3269	4.71106
1	-8.21533	GO:0140013	M1	1	0	GO Biological Processes	19	meiotic nuclear division	-8.21533	3.32787	7.20558	24155	172	1266	30	2.36967	0.427483	991|994|1164|2175|2827|5347|5719|5888|5889|6790|8438|9134|9232|9319|9665|9700|9985|22933|23304|23397|25788|26271|29781|29893|29988|83540|84057|146956|192670|286151	CDC20|CDC25B|CKS2|FANCA|GPR3|PLK1|PSMD13|RAD51|RAD51C|AURKA|RAD54L|CCNE2|PTTG1|TRIP13|MARF1|ESPL1|REC8|SIRT2|UBR2|NCAPH|RAD54B|FBXO5|NCAPH2|PSMC3IP|SLC2A8|NUF2|MND1|EME1|AGO4|FBXO43	-5.55882	0	5	0	0	-10.165	3.97495
1	-8.15922	GO:0051306	M1	1	0	GO Biological Processes	19	mitotic sister chromatid separation	-8.15922	5.40594	8.03616	24155	60	1266	17	1.34281	0.323486	324|891|991|4085|5347|9183|9212|9232|9319|9700|10403|10460|26271|29781|51433|51529|81620	APC|CCNB1|CDC20|MAD2L1|PLK1|ZW10|AURKB|PTTG1|TRIP13|ESPL1|NDC80|TACC3|FBXO5|NCAPH2|ANAPC5|ANAPC11|CDT1	-5.51495	0	6	0	0	-10.0764	6.73404
1	-8.08268	GO:0033047	M1	1	0	GO Biological Processes	19	regulation of mitotic sister chromatid segregation	-8.08268	5.05053	7.86634	24155	68	1266	18	1.4218	0.332731	324|546|891|991|4085|5347|9183|9212|9232|9319|9555|9700|10403|10460|26271|51433|51529|81620	APC|ATRX|CCNB1|CDC20|MAD2L1|PLK1|ZW10|AURKB|PTTG1|TRIP13|MACROH2A1|ESPL1|NDC80|TACC3|FBXO5|ANAPC5|ANAPC11|CDT1	-5.45031	0	6	0	0	-10.0764	6.73404
1	-7.95771	GO:0051640	M1	1	0	GO Biological Processes	19	organelle localization	-7.95771	1.99986	6.34131	24155	706	1266	74	5.84518	0.659331	372|858|891|966|983|1058|1113|1138|1141|1759|2348|3800|3833|4085|4628|4751|5170|5347|5865|5873|5874|6616|6790|6855|6860|7283|8301|8409|8615|8636|8655|8867|9001|9183|9341|9515|9581|9700|9702|9900|10015|10113|10228|10253|10403|10615|10814|11004|11196|22872|22930|23354|51203|55143|55165|55559|55717|55823|57488|65009|79443|80128|80208|81620|83540|84446|84722|84902|89958|91978|93323|115106|254263|5948…	ARCN1|CAV2|CCNB1|CD59|CDK1|CENPA|CHGA|CHRNA5|CHRNB2|DNM1|FOLR1|KIF5C|KIFC1|MAD2L1|MYH10|NEK2|PDPK1|PLK1|RAB3B|RAB27A|RAB27B|SNAP25|AURKA|SYP|SYT4|TUBG1|PICALM|UXT|USO1|SSNA1|DYNLL1|SYNJ1|HAP1|ZW10|VAMP3|STXBP5L|PREPL|ESPL1|CEP57|SV2A|PDCD6IP|PREB|STX6|SPRY2|NDC80|SPAG5|CPLX2|KIF2C|SEC23IP|SEC31A|RAB3GAP1|HAUS5|NUSAP1|CDCA8|CEP55|HAUS7|WDR11|VPS11|ESYT2|NDRG4|FYCO1|TRIM46|SPG11|CDT1|NUF2|BRSK1|PSR…	-5.33692	0	9	1	1	-7.95771	2.44613
1	-7.89225	GO:0045786	M1	1	0	GO Biological Processes	19	negative regulation of cell cycle	-7.89225	2.05063	6.34544	24155	642	1266	69	5.45024	0.638001	324|546|581|596|891|899|983|991|995|1019|1032|1033|1432|1869|1956|2146|3014|3265|3276|3398|3642|3843|4085|4751|4760|4851|5111|5347|5608|5688|5691|5692|5694|5704|5719|5888|5934|6241|6790|6934|7026|8318|8409|8914|9183|9212|9232|9319|9555|9700|9735|10217|10403|11130|25959|26271|28227|51347|51512|55743|56241|57646|79035|81620|84446|84897|90480|146956|286151	APC|ATRX|BAX|BCL2|CCNB1|CCNF|CDK1|CDC20|CDC25C|CDK4|CDKN2D|CDKN3|MAPK14|E2F1|EGFR|EZH2|H2AX|HRAS|PRMT1|ID2|INSM1|IPO5|MAD2L1|NEK2|NEUROD1|NOTCH1|PCNA|PLK1|MAP2K6|PSMA7|PSMB3|PSMB4|PSMB6|PSMC4|PSMD13|RAD51|RBL2|RRM2|AURKA|TCF7L2|NR2F2|CDC45|UXT|TIMELESS|ZW10|AURKB|PTTG1|TRIP13|MACROH2A1|ESPL1|KNTC1|CTDSPL|NDC80|ZWINT|KANK2|FBXO5|PPP2R3B|TAOK3|GTSE1|CHFR|SUSD2|USP28|NABP2|CDT1|BRSK1|TBRG1|GADD45GIP…	-5.28274	0	2	0	0	-17.3269	4.71106
1	-7.64261	GO:1902749	M1	1	0	GO Biological Processes	19	regulation of cell cycle G2/M phase transition	-7.64261	2.95602	6.74344	24155	213	1266	33	2.60664	0.447804	891|983|993|994|995|1019|4751|5347|5688|5691|5692|5694|5704|5719|5889|6790|7283|8636|8655|9212|9555|9702|22974|23354|25942|26271|51347|51512|55559|80174|84446|93323|115106	CCNB1|CDK1|CDC25A|CDC25B|CDC25C|CDK4|NEK2|PLK1|PSMA7|PSMB3|PSMB4|PSMB6|PSMC4|PSMD13|RAD51C|AURKA|TUBG1|SSNA1|DYNLL1|AURKB|MACROH2A1|CEP57|TPX2|HAUS5|SIN3A|FBXO5|TAOK3|GTSE1|HAUS7|DBF4B|BRSK1|HAUS8|HAUS1	-5.05482	0	2	0	0	-17.3269	4.71106
1	-7.65257	GO:0010965	M1	1	0	GO Biological Processes	19	regulation of mitotic sister chromatid separation	-7.65257	5.35573	7.74293	24155	57	1266	16	1.26382	0.313953	324|891|991|4085|5347|9183|9212|9232|9319|9700|10403|10460|26271|51433|51529|81620	APC|CCNB1|CDC20|MAD2L1|PLK1|ZW10|AURKB|PTTG1|TRIP13|ESPL1|NDC80|TACC3|FBXO5|ANAPC5|ANAPC11|CDT1	-5.05482	0	6	0	0	-10.0764	6.73404
1	-7.57666	GO:0045930	M1	1	0	GO Biological Processes	19	negative regulation of mitotic cell cycle	-7.57666	2.48376	6.46065	24155	338	1266	44	3.47551	0.514768	324|546|581|596|891|983|991|995|1019|1032|1869|1956|2146|3265|3276|4085|5111|5347|5688|5691|5692|5694|5704|5719|5934|6790|9183|9212|9232|9319|9735|10217|10403|11130|25959|26271|51347|51512|55743|79035|81620|84446|90480|146956	APC|ATRX|BAX|BCL2|CCNB1|CDK1|CDC20|CDC25C|CDK4|CDKN2D|E2F1|EGFR|EZH2|HRAS|PRMT1|MAD2L1|PCNA|PLK1|PSMA7|PSMB3|PSMB4|PSMB6|PSMC4|PSMD13|RBL2|AURKA|ZW10|AURKB|PTTG1|TRIP13|KNTC1|CTDSPL|NDC80|ZWINT|KANK2|FBXO5|TAOK3|GTSE1|CHFR|NABP2|CDT1|BRSK1|GADD45GIP1|EME1	-4.99933	0	2	0	0	-17.3269	4.71106
1	-7.56414	GO:0045931	M1	1	0	GO Biological Processes	19	positive regulation of mitotic cell cycle	-7.56414	3.27751	6.86149	24155	163	1266	28	2.21169	0.413322	440|891|983|993|994|995|1019|1956|1978|4085|5889|5902|5962|6790|8318|9555|9700|10403|11065|25942|26057|26271|29766|51203|51433|51529|80174|81620	ASNS|CCNB1|CDK1|CDC25A|CDC25B|CDC25C|CDK4|EGFR|EIF4EBP1|MAD2L1|RAD51C|RANBP1|RDX|AURKA|CDC45|MACROH2A1|ESPL1|NDC80|UBE2C|SIN3A|ANKRD17|FBXO5|TMOD3|NUSAP1|ANAPC5|ANAPC11|DBF4B|CDT1	-4.99703	0	8	0	0	-9.24571	7.06658
1	-7.54168	GO:0033046	M1	1	0	GO Biological Processes	19	negative regulation of sister chromatid segregation	-7.54168	6.07084	7.91765	24155	44	1266	14	1.10585	0.293911	324|546|891|991|4085|5347|9183|9212|9232|9319|9700|10403|26271|81620	APC|ATRX|CCNB1|CDC20|MAD2L1|PLK1|ZW10|AURKB|PTTG1|TRIP13|ESPL1|NDC80|FBXO5|CDT1	-4.98456	0	6	0	0	-10.0764	6.73404
1	-7.43209	GO:0010389	M1	1	0	GO Biological Processes	19	regulation of G2/M transition of mitotic cell cycle	-7.43209	3.01772	6.67041	24155	196	1266	31	2.44866	0.434374	891|983|993|994|995|1019|4751|5347|5688|5691|5692|5694|5704|5719|5889|6790|7283|8636|8655|9212|9702|22974|23354|25942|26271|51347|55559|80174|84446|93323|115106	CCNB1|CDK1|CDC25A|CDC25B|CDC25C|CDK4|NEK2|PLK1|PSMA7|PSMB3|PSMB4|PSMB6|PSMC4|PSMD13|RAD51C|AURKA|TUBG1|SSNA1|DYNLL1|AURKB|CEP57|TPX2|HAUS5|SIN3A|FBXO5|TAOK3|HAUS7|DBF4B|BRSK1|HAUS8|HAUS1	-4.88473	0	2	0	0	-17.3269	4.71106
1	-7.40124	GO:0051985	M1	1	0	GO Biological Processes	19	negative regulation of chromosome segregation	-7.40124	5.93593	7.79426	24155	45	1266	14	1.10585	0.293911	324|546|891|991|4085|5347|9183|9212|9232|9319|9700|10403|26271|81620	APC|ATRX|CCNB1|CDC20|MAD2L1|PLK1|ZW10|AURKB|PTTG1|TRIP13|ESPL1|NDC80|FBXO5|CDT1	-4.87276	0	6	0	0	-10.0764	6.73404
1	-7.4079	GO:1901992	M1	1	0	GO Biological Processes	19	positive regulation of mitotic cell cycle phase transition	-7.4079	4.19336	7.17765	24155	91	1266	20	1.57978	0.350448	891|983|993|994|995|1019|1956|5889|5962|8318|9700|11065|25942|26057|26271|29766|51433|51529|80174|81620	CCNB1|CDK1|CDC25A|CDC25B|CDC25C|CDK4|EGFR|RAD51C|RDX|CDC45|ESPL1|UBE2C|SIN3A|ANKRD17|FBXO5|TMOD3|ANAPC5|ANAPC11|DBF4B|CDT1	-4.87276	0	8	0	0	-9.24571	7.06658
1	-7.30261	GO:0061982	M1	1	0	GO Biological Processes	19	meiosis I cell cycle process	-7.30261	3.68769	6.91225	24155	119	1266	23	1.81675	0.375361	993|994|995|1164|5347|5719|5888|5889|6790|8438|9134|9232|9319|9700|9985|23304|25788|26271|29893|29988|84057|146956|192670	CDC25A|CDC25B|CDC25C|CKS2|PLK1|PSMD13|RAD51|RAD51C|AURKA|RAD54L|CCNE2|PTTG1|TRIP13|ESPL1|REC8|UBR2|RAD54B|FBXO5|PSMC3IP|SLC2A8|MND1|EME1|AGO4	-4.79223	0	5	0	0	-10.165	3.97495
1	-7.30707	GO:0010256	M1	1	0	GO Biological Processes	19	endomembrane system organization	-7.30707	2.23961	6.19301	24155	443	1266	52	4.10742	0.557777	288|858|891|983|1759|1760|4628|5347|5605|5873|6449|6855|6860|7110|7443|8548|8615|8867|9101|9133|9183|9648|10015|10087|10228|10254|11196|11267|22872|22930|23682|26092|26509|29993|30846|51308|55111|55823|60684|64145|64398|79188|79633|79659|80346|91754|115548|149371|257364|343702|399979|493829	ANK3|CAV2|CCNB1|CDK1|DNM1|DMPK|MYH10|PLK1|MAP2K2|RAB27A|SGTA|SYP|SYT4|TMF1|VRK1|BLZF1|USO1|SYNJ1|USP8|CCNB2|ZW10|GCC2|PDCD6IP|CERT1|STX6|STAM2|SEC23IP|SNF8|SEC31A|RAB3GAP1|RAB38|TOR1AIP1|MYOF|PACSIN1|EHD2|REEP2|PLEKHJ1|VPS11|TRAPPC11|RBSN|MPP5|TMEM43|FAT4|DYNC2H1|REEP4|NEK9|FCHO2|EXOC8|SNX33|XKR7|SNX19|TRIM72	-4.79223	0	10	1	1	-7.30707	2.89819
1	-7.16717	GO:0010948	M1	1	0	GO Biological Processes	19	negative regulation of cell cycle process	-7.16717	2.37837	6.20558	24155	361	1266	45	3.5545	0.520372	324|546|581|596|891|899|983|991|995|1019|1032|1869|2146|3276|4085|4751|5111|5347|5688|5691|5692|5694|5704|5719|5888|5934|6241|6790|8409|9183|9212|9232|9319|9555|9700|10217|10403|25959|26271|51347|51512|56241|81620|84446|286151	APC|ATRX|BAX|BCL2|CCNB1|CCNF|CDK1|CDC20|CDC25C|CDK4|CDKN2D|E2F1|EZH2|PRMT1|MAD2L1|NEK2|PCNA|PLK1|PSMA7|PSMB3|PSMB4|PSMB6|PSMC4|PSMD13|RAD51|RBL2|RRM2|AURKA|UXT|ZW10|AURKB|PTTG1|TRIP13|MACROH2A1|ESPL1|CTDSPL|NDC80|KANK2|FBXO5|TAOK3|GTSE1|SUSD2|CDT1|BRSK1|FBXO43	-4.66556	0	2	0	0	-17.3269	4.71106
1	-7.1463	GO:0007091	M1	1	0	GO Biological Processes	19	metaphase/anaphase transition of mitotic cell cycle	-7.1463	5.29994	7.43943	24155	54	1266	15	1.18483	0.304105	324|891|991|4085|5347|9183|9212|9319|9700|10403|10460|26271|51433|51529|81620	APC|CCNB1|CDC20|MAD2L1|PLK1|ZW10|AURKB|TRIP13|ESPL1|NDC80|TACC3|FBXO5|ANAPC5|ANAPC11|CDT1	-4.65329	0	6	0	0	-10.0764	6.73404
1	-7.08628	GO:1905818	M1	1	0	GO Biological Processes	19	regulation of chromosome separation	-7.08628	4.92381	7.2754	24155	62	1266	16	1.26382	0.313953	324|891|991|4085|5347|9183|9212|9232|9319|9700|10403|10460|26271|51433|51529|81620	APC|CCNB1|CDC20|MAD2L1|PLK1|ZW10|AURKB|PTTG1|TRIP13|ESPL1|NDC80|TACC3|FBXO5|ANAPC5|ANAPC11|CDT1	-4.60171	0	6	0	0	-10.0764	6.73404
1	-6.96668	GO:0000075	M1	1	0	GO Biological Processes	19	cell cycle checkpoint	-6.96668	2.82663	6.34196	24155	216	1266	32	2.52765	0.441146	324|581|891|983|991|995|1432|1869|3014|3265|3276|4085|5111|5347|5934|6790|8318|8914|9183|9212|9319|9735|10403|11130|51347|51512|55743|57646|79035|81620|84446|146956	APC|BAX|CCNB1|CDK1|CDC20|CDC25C|MAPK14|E2F1|H2AX|HRAS|PRMT1|MAD2L1|PCNA|PLK1|RBL2|AURKA|CDC45|TIMELESS|ZW10|AURKB|TRIP13|KNTC1|NDC80|ZWINT|TAOK3|GTSE1|CHFR|USP28|NABP2|CDT1|BRSK1|EME1	-4.49038	0	2	0	0	-17.3269	4.71106
1	-6.94498	GO:0021700	M1	1	0	GO Biological Processes	19	developmental maturation	-6.94498	2.55293	6.19118	24155	284	1266	38	3.00158	0.479557	372|429|558|596|718|816|891|991|994|2046|2261|3398|5216|5241|5979|6790|6855|6860|7298|8301|8941|9148|9319|9378|9985|22933|23682|26057|26271|51083|51286|54738|59277|79633|84530|124925|375790|399979	ARCN1|ASCL1|AXL|BCL2|C3|CAMK2B|CCNB1|CDC20|CDC25B|EPHA8|FGFR3|ID2|PFN1|PGR|RET|AURKA|SYP|SYT4|TYMS|PICALM|CDK5R2|NEURL1|TRIP13|NRXN1|REC8|SIRT2|RAB38|ANKRD17|FBXO5|GAL|CEND1|FEV|NTN4|FAT4|SRRM4|SEZ6|AGRN|SNX19	-4.47679	0	11	1	1	-6.94498	3.24762
1	-6.91552	GO:0044784	M1	1	0	GO Biological Processes	19	metaphase/anaphase transition of cell cycle	-6.91552	5.11066	7.24275	24155	56	1266	15	1.18483	0.304105	324|891|991|4085|5347|9183|9212|9319|9700|10403|10460|26271|51433|51529|81620	APC|CCNB1|CDC20|MAD2L1|PLK1|ZW10|AURKB|TRIP13|ESPL1|NDC80|TACC3|FBXO5|ANAPC5|ANAPC11|CDT1	-4.46314	0	6	0	0	-10.0764	6.73404
1	-6.91701	GO:1901989	M1	1	0	GO Biological Processes	19	positive regulation of cell cycle phase transition	-6.91701	3.77996	6.74591	24155	106	1266	21	1.65877	0.358958	891|983|993|994|995|1019|1956|2146|5889|5962|8318|9700|11065|25942|26057|26271|29766|51433|51529|80174|81620	CCNB1|CDK1|CDC25A|CDC25B|CDC25C|CDK4|EGFR|EZH2|RAD51C|RDX|CDC45|ESPL1|UBE2C|SIN3A|ANKRD17|FBXO5|TMOD3|ANAPC5|ANAPC11|DBF4B|CDT1	-4.46314	0	8	0	0	-9.24571	7.06658
1	-6.88603	GO:0033048	M1	1	0	GO Biological Processes	19	negative regulation of mitotic sister chromatid segregation	-6.88603	5.90565	7.4833	24155	42	1266	13	1.02686	0.283333	324|546|891|991|4085|5347|9183|9212|9232|9319|10403|26271|81620	APC|ATRX|CCNB1|CDC20|MAD2L1|PLK1|ZW10|AURKB|PTTG1|TRIP13|NDC80|FBXO5|CDT1	-4.44132	0	6	0	0	-10.0764	6.73404
1	-6.86835	GO:0007093	M1	1	0	GO Biological Processes	19	mitotic cell cycle checkpoint	-6.86835	3.12215	6.4328	24155	165	1266	27	2.1327	0.406038	324|581|891|983|991|995|1869|3265|3276|4085|5111|5347|5934|6790|9183|9212|9319|9735|10403|11130|51347|51512|55743|79035|81620|84446|146956	APC|BAX|CCNB1|CDK1|CDC20|CDC25C|E2F1|HRAS|PRMT1|MAD2L1|PCNA|PLK1|RBL2|AURKA|ZW10|AURKB|TRIP13|KNTC1|NDC80|ZWINT|TAOK3|GTSE1|CHFR|NABP2|CDT1|BRSK1|EME1	-4.4312	0	2	0	0	-17.3269	4.71106
1	-6.77557	GO:0051304	M1	1	0	GO Biological Processes	19	chromosome separation	-6.77557	4.02795	6.76824	24155	90	1266	19	1.50079	0.341711	324|891|991|4085|5347|9183|9212|9232|9319|9700|10403|10460|23397|26271|29781|51433|51529|81620|146956	APC|CCNB1|CDC20|MAD2L1|PLK1|ZW10|AURKB|PTTG1|TRIP13|ESPL1|NDC80|TACC3|NCAPH|FBXO5|NCAPH2|ANAPC5|ANAPC11|CDT1|EME1	-4.35314	0	6	0	0	-10.0764	6.73404
1	-6.78067	GO:0000281	M1	1	0	GO Biological Processes	19	mitotic cytokinesis	-6.78067	4.44324	6.92915	24155	73	1266	17	1.34281	0.323486	288|324|1058|3925|4628|5347|6651|9094|9101|9700|10015|24137|51203|55165|81620|112574|257364	ANK3|APC|CENPA|STMN1|MYH10|PLK1|SON|UNC119|USP8|ESPL1|PDCD6IP|KIF4A|NUSAP1|CEP55|CDT1|SNX18|SNX33	-4.35314	0	12	1	1	-6.78067	4.44324
1	-6.69772	GO:1901988	M1	1	0	GO Biological Processes	19	negative regulation of cell cycle phase transition	-6.69772	2.57255	6.07672	24155	267	1266	36	2.8436	0.467147	324|581|596|891|983|991|995|1019|1032|1869|2146|3276|4085|5111|5347|5688|5691|5692|5694|5704|5719|5934|6790|9183|9212|9319|9555|10217|10403|25959|26271|51347|51512|56241|81620|84446	APC|BAX|BCL2|CCNB1|CDK1|CDC20|CDC25C|CDK4|CDKN2D|E2F1|EZH2|PRMT1|MAD2L1|PCNA|PLK1|PSMA7|PSMB3|PSMB4|PSMB6|PSMC4|PSMD13|RBL2|AURKA|ZW10|AURKB|TRIP13|MACROH2A1|CTDSPL|NDC80|KANK2|FBXO5|TAOK3|GTSE1|SUSD2|CDT1|BRSK1	-4.28247	0	2	0	0	-17.3269	4.71106
1	-6.64047	GO:0030071	M1	1	0	GO Biological Processes	19	regulation of mitotic metaphase/anaphase transition	-6.64047	5.23759	7.12454	24155	51	1266	14	1.10585	0.293911	324|891|991|4085|5347|9183|9212|9319|9700|10403|26271|51433|51529|81620	APC|CCNB1|CDC20|MAD2L1|PLK1|ZW10|AURKB|TRIP13|ESPL1|NDC80|FBXO5|ANAPC5|ANAPC11|CDT1	-4.23229	0	6	0	0	-10.0764	6.73404
1	-6.54227	GO:0000079	M1	1	0	GO Biological Processes	19	regulation of cyclin-dependent protein serine/threonine kinase activity	-6.54227	3.74113	6.52444	24155	102	1266	20	1.57978	0.350448	324|890|891|899|993|995|1019|1032|1033|1164|1956|3843|5347|7026|8941|9088|9133|9134|79935|84722	APC|CCNA2|CCNB1|CCNF|CDC25A|CDC25C|CDK4|CDKN2D|CDKN3|CKS2|EGFR|IPO5|PLK1|NR2F2|CDK5R2|PKMYT1|CCNB2|CCNE2|CNTD2|PSRC1	-4.14104	0	13	1	1	-6.54227	3.74113
1	-6.53493	GO:1901991	M1	1	0	GO Biological Processes	19	negative regulation of mitotic cell cycle phase transition	-6.53493	2.61578	6.01509	24155	248	1266	34	2.68562	0.454354	324|581|596|891|983|991|995|1019|1032|1869|2146|3276|4085|5111|5347|5688|5691|5692|5694|5704|5719|5934|6790|9183|9212|9319|10217|10403|25959|26271|51347|51512|81620|84446	APC|BAX|BCL2|CCNB1|CDK1|CDC20|CDC25C|CDK4|CDKN2D|E2F1|EZH2|PRMT1|MAD2L1|PCNA|PLK1|PSMA7|PSMB3|PSMB4|PSMB6|PSMC4|PSMD13|RBL2|AURKA|ZW10|AURKB|TRIP13|CTDSPL|NDC80|KANK2|FBXO5|TAOK3|GTSE1|CDT1|BRSK1	-4.14053	0	2	0	0	-17.3269	4.71106
1	-6.44798	GO:0043161	M1	1	0	GO Biological Processes	19	proteasome-mediated ubiquitin-dependent protein catabolic process	-6.44798	2.18055	5.73999	24155	420	1266	48	3.79147	0.536777	329|891|899|983|991|997|3077|4085|5347|5688|5691|5692|5694|5704|5719|5886|6449|6790|7337|8065|8945|9212|9232|9354|9655|9683|9695|10277|11065|22933|23304|23640|25820|26046|26224|26271|27252|27338|51433|51434|51529|55743|55872|80196|144165|153769|197131|493829	BIRC2|CCNB1|CCNF|CDK1|CDC20|CDC34|HFE|MAD2L1|PLK1|PSMA7|PSMB3|PSMB4|PSMB6|PSMC4|PSMD13|RAD23A|SGTA|AURKA|UBE3A|CUL5|BTRC|AURKB|PTTG1|UBE4A|SOCS5|N4BP1|EDEM1|UBE4B|UBE2C|SIRT2|UBR2|HSPBP1|ARIH1|LTN1|FBXL3|FBXO5|KLHL20|UBE2S|ANAPC5|ANAPC7|ANAPC11|CHFR|PBK|RNF34|PRICKLE1|SH3RF2|UBR1|TRIM72	-4.06031	0	14	1	1	-6.44798	2.55948
1	-6.41378	GO:1902099	M1	1	0	GO Biological Processes	19	regulation of metaphase/anaphase transition of cell cycle	-6.41378	5.03994	6.92444	24155	53	1266	14	1.10585	0.293911	324|891|991|4085|5347|9183|9212|9319|9700|10403|26271|51433|51529|81620	APC|CCNB1|CDC20|MAD2L1|PLK1|ZW10|AURKB|TRIP13|ESPL1|NDC80|FBXO5|ANAPC5|ANAPC11|CDT1	-4.03275	0	6	0	0	-10.0764	6.73404
1	-6.37013	GO:2000816	M1	1	0	GO Biological Processes	19	negative regulation of mitotic sister chromatid separation	-6.37013	5.8707	7.15928	24155	39	1266	12	0.947867	0.272326	324|891|991|4085|5347|9183|9212|9232|9319|10403|26271|81620	APC|CCNB1|CDC20|MAD2L1|PLK1|ZW10|AURKB|PTTG1|TRIP13|NDC80|FBXO5|CDT1	-3.99563	0	6	0	0	-10.0764	6.73404
1	-6.35828	GO:0007127	M1	1	0	GO Biological Processes	19	meiosis I	-6.35828	3.5147	6.32936	24155	114	1266	21	1.65877	0.358958	994|1164|5347|5719|5888|5889|6790|8438|9134|9232|9319|9700|9985|23304|25788|26271|29893|29988|84057|146956|192670	CDC25B|CKS2|PLK1|PSMD13|RAD51|RAD51C|AURKA|RAD54L|CCNE2|PTTG1|TRIP13|ESPL1|REC8|UBR2|RAD54B|FBXO5|PSMC3IP|SLC2A8|MND1|EME1|AGO4	-3.99021	0	5	0	0	-10.165	3.97495
1	-6.25999	GO:1904029	M1	1	0	GO Biological Processes	19	regulation of cyclin-dependent protein kinase activity	-6.25999	3.59996	6.30912	24155	106	1266	20	1.57978	0.350448	324|890|891|899|993|995|1019|1032|1033|1164|1956|3843|5347|7026|8941|9088|9133|9134|79935|84722	APC|CCNA2|CCNB1|CCNF|CDC25A|CDC25C|CDK4|CDKN2D|CDKN3|CKS2|EGFR|IPO5|PLK1|NR2F2|CDK5R2|PKMYT1|CCNB2|CCNE2|CNTD2|PSRC1	-3.89826	0	13	0	0	-6.54227	3.74113
1	-6.25077	GO:0010971	M1	1	0	GO Biological Processes	19	positive regulation of G2/M transition of mitotic cell cycle	-6.25077	7.06658	7.4176	24155	27	1266	10	0.789889	0.248796	891|983|993|994|995|1019|5889|25942|26271|80174	CCNB1|CDK1|CDC25A|CDC25B|CDC25C|CDK4|RAD51C|SIN3A|FBXO5|DBF4B	-3.89529	0	8	0	0	-9.24571	7.06658
1	-6.2364	GO:1905819	M1	1	0	GO Biological Processes	19	negative regulation of chromosome separation	-6.2364	5.72393	7.03215	24155	40	1266	12	0.947867	0.272326	324|891|991|4085|5347|9183|9212|9232|9319|10403|26271|81620	APC|CCNB1|CDC20|MAD2L1|PLK1|ZW10|AURKB|PTTG1|TRIP13|NDC80|FBXO5|CDT1	-3.88708	0	6	0	0	-10.0764	6.73404
1	-6.03728	GO:0032392	M1	1	0	GO Biological Processes	19	DNA geometric change	-6.03728	3.36702	6.08755	24155	119	1266	21	1.65877	0.358958	546|1106|1663|2074|3148|4176|5888|5982|5984|8318|8438|9401|9837|10721|10856|25788|51659|79075|80119|80205|440081	ATRX|CHD2|DDX11|ERCC6|HMGB2|MCM7|RAD51|RFC2|RFC4|CDC45|RAD54L|RECQL4|GINS1|POLQ|RUVBL2|RAD54B|GINS2|DSCC1|PIF1|CHD9|DDX12P	-3.69403	0	3	0	0	-13.2963	6.67792
1	-6.01249	GO:0034502	M1	1	0	GO Biological Processes	19	protein localization to chromosome	-6.01249	3.95556	6.30493	24155	82	1266	17	1.34281	0.323486	546|983|1058|2146|5347|9183|9212|9555|10403|10856|55011|55135|79035|81620|83903|157570|222229	ATRX|CDK1|CENPA|EZH2|PLK1|ZW10|AURKB|MACROH2A1|NDC80|RUVBL2|PIH1D1|WRAP53|NABP2|CDT1|HASPIN|ESCO2|LRWD1	-3.67524	0	6	0	0	-10.0764	6.73404
1	-5.96857	GO:0044843	M1	1	0	GO Biological Processes	19	cell cycle G1/S phase transition	-5.96857	2.36897	5.5923	24155	298	1266	37	2.92259	0.473398	581|596|890|891|983|993|995|997|1019|1032|1033|1869|1956|1978|2146|3276|3398|4176|4863|5111|5427|5934|5962|6241|6790|7298|8065|8318|9134|10217|23594|25959|26057|26271|51512|56241|81620	BAX|BCL2|CCNA2|CCNB1|CDK1|CDC25A|CDC25C|CDC34|CDK4|CDKN2D|CDKN3|E2F1|EGFR|EIF4EBP1|EZH2|PRMT1|ID2|MCM7|NPAT|PCNA|POLE2|RBL2|RDX|RRM2|AURKA|TYMS|CUL5|CDC45|CCNE2|CTDSPL|ORC6|KANK2|ANKRD17|FBXO5|GTSE1|SUSD2|CDT1	-3.63722	0	15	1	1	-5.96857	3.4071
1	-5.92786	GO:0010498	M1	1	0	GO Biological Processes	19	proteasomal protein catabolic process	-5.92786	2.03998	5.39521	24155	477	1266	51	4.02844	0.552615	329|891|899|983|991|997|3077|4085|4983|5347|5688|5691|5692|5694|5704|5719|5886|6449|6790|7110|7337|8065|8945|9212|9232|9354|9655|9683|9695|10277|11065|22933|23304|23640|25820|26046|26224|26271|27252|27338|29761|51433|51434|51529|55743|55872|80196|144165|153769|197131|493829	BIRC2|CCNB1|CCNF|CDK1|CDC20|CDC34|HFE|MAD2L1|OPHN1|PLK1|PSMA7|PSMB3|PSMB4|PSMB6|PSMC4|PSMD13|RAD23A|SGTA|AURKA|TMF1|UBE3A|CUL5|BTRC|AURKB|PTTG1|UBE4A|SOCS5|N4BP1|EDEM1|UBE4B|UBE2C|SIRT2|UBR2|HSPBP1|ARIH1|LTN1|FBXL3|FBXO5|KLHL20|UBE2S|USP25|ANAPC5|ANAPC7|ANAPC11|CHFR|PBK|RNF34|PRICKLE1|SH3RF2|UBR1|TRIM72	-3.60235	0	14	0	0	-6.44798	2.55948
1	-5.85341	GO:0045841	M1	1	0	GO Biological Processes	19	negative regulation of mitotic metaphase/anaphase transition	-5.85341	5.82993	6.82041	24155	36	1266	11	0.868878	0.260836	324|891|991|4085|5347|9183|9212|9319|10403|26271|81620	APC|CCNB1|CDC20|MAD2L1|PLK1|ZW10|AURKB|TRIP13|NDC80|FBXO5|CDT1	-3.53365	0	6	0	0	-10.0764	6.73404
1	-5.78512	GO:0000082	M1	1	0	GO Biological Processes	19	G1/S transition of mitotic cell cycle	-5.78512	2.39352	5.50596	24155	279	1266	35	2.76461	0.4608	581|596|891|983|993|995|997|1019|1032|1033|1869|1956|1978|2146|3276|3398|4176|4863|5111|5427|5934|5962|6241|6790|7298|8065|8318|9134|10217|23594|25959|26057|26271|51512|81620	BAX|BCL2|CCNB1|CDK1|CDC25A|CDC25C|CDC34|CDK4|CDKN2D|CDKN3|E2F1|EGFR|EIF4EBP1|EZH2|PRMT1|ID2|MCM7|NPAT|PCNA|POLE2|RBL2|RDX|RRM2|AURKA|TYMS|CUL5|CDC45|CCNE2|CTDSPL|ORC6|KANK2|ANKRD17|FBXO5|GTSE1|CDT1	-3.47104	0	15	0	0	-5.96857	3.4071
1	-5.7618	GO:1902751	M1	1	0	GO Biological Processes	19	positive regulation of cell cycle G2/M phase transition	-5.7618	6.35993	6.9085	24155	30	1266	10	0.789889	0.248796	891|983|993|994|995|1019|5889|25942|26271|80174	CCNB1|CDK1|CDC25A|CDC25B|CDC25C|CDK4|RAD51C|SIN3A|FBXO5|DBF4B	-3.45755	0	8	0	0	-9.24571	7.06658
1	-5.7605	GO:0051656	M1	1	0	GO Biological Processes	19	establishment of organelle localization	-5.7605	1.9828	5.27568	24155	510	1266	53	4.18641	0.562883	891|966|1058|1113|1138|1141|1759|2348|3800|3833|4085|4628|5170|5347|5873|5874|6616|6855|6860|8301|8409|8615|8867|9001|9183|9341|9515|9581|9700|9900|10015|10113|10253|10403|10615|10814|11004|11196|22872|22930|51203|55143|55165|55717|79443|80128|80208|81620|83540|84722|89958|254263|594855	CCNB1|CD59|CENPA|CHGA|CHRNA5|CHRNB2|DNM1|FOLR1|KIF5C|KIFC1|MAD2L1|MYH10|PDPK1|PLK1|RAB27A|RAB27B|SNAP25|SYP|SYT4|PICALM|UXT|USO1|SYNJ1|HAP1|ZW10|VAMP3|STXBP5L|PREPL|ESPL1|SV2A|PDCD6IP|PREB|SPRY2|NDC80|SPAG5|CPLX2|KIF2C|SEC23IP|SEC31A|RAB3GAP1|NUSAP1|CDCA8|CEP55|WDR11|FYCO1|TRIM46|SPG11|CDT1|NUF2|PSRC1|SAPCD2|CNIH2|CPLX3	-3.45755	0	9	0	0	-7.95771	2.44613
1	-5.74654	GO:1903827	M1	1	0	GO Biological Processes	19	regulation of cellular protein localization	-5.74654	1.96624	5.25904	24155	524	1266	54	4.2654	0.567934	288|324|596|983|1432|1869|1956|1969|2040|2664|3002|3077|3265|3843|4946|5170|5300|5347|5581|5780|5962|6934|7429|8301|9134|9141|9555|9648|9695|10204|10228|10403|10445|10456|11142|22841|23171|25942|26056|51512|51684|55135|55486|55823|59286|80128|81620|81926|89958|91461|221914|257364|340146|440730	ANK3|APC|BCL2|CDK1|MAPK14|E2F1|EGFR|EPHA2|STOM|GDI1|GZMB|HFE|HRAS|IPO5|OAZ1|PDPK1|PIN1|PLK1|PRKCE|PTPN9|RDX|TCF7L2|VIL1|PICALM|CCNE2|PDCD5|MACROH2A1|GCC2|EDEM1|NUTF2|STX6|NDC80|MCRS1|HAX1|PKIG|RAB11FIP2|GPD1L|SIN3A|RAB11FIP5|GTSE1|SUFU|WRAP53|PARL|VPS11|UBL5|TRIM46|CDT1|ABHD17A|SAPCD2|PKDCC|GPC2|SNX33|SLC35D3|TRIM67	-3.44905	0	16	1	1	-5.74654	2.18948
1	-5.7212	GO:1902100	M1	1	0	GO Biological Processes	19	negative regulation of metaphase/anaphase transition of cell cycle	-5.7212	5.67237	6.68906	24155	37	1266	11	0.868878	0.260836	324|891|991|4085|5347|9183|9212|9319|10403|26271|81620	APC|CCNB1|CDC20|MAD2L1|PLK1|ZW10|AURKB|TRIP13|NDC80|FBXO5|CDT1	-3.42911	0	6	0	0	-10.0764	6.73404
1	-5.70493	GO:0051784	M1	1	0	GO Biological Processes	19	negative regulation of nuclear division	-5.70493	4.45195	6.29614	24155	60	1266	14	1.10585	0.293911	324|546|891|991|4085|5347|9183|9212|9232|9319|10403|26271|81620|286151	APC|ATRX|CCNB1|CDC20|MAD2L1|PLK1|ZW10|AURKB|PTTG1|TRIP13|NDC80|FBXO5|CDT1|FBXO43	-3.42129	0	6	0	0	-10.0764	6.73404
1	-5.70278	GO:0045839	M1	1	0	GO Biological Processes	19	negative regulation of mitotic nuclear division	-5.70278	4.76994	6.40028	24155	52	1266	13	1.02686	0.283333	324|546|891|991|4085|5347|9183|9212|9232|9319|10403|26271|81620	APC|ATRX|CCNB1|CDC20|MAD2L1|PLK1|ZW10|AURKB|PTTG1|TRIP13|NDC80|FBXO5|CDT1	-3.42129	0	6	0	0	-10.0764	6.73404
1	-5.64786	GO:0010638	M1	1	0	GO Biological Processes	19	positive regulation of organelle organization	-5.64786	1.86517	5.14958	24155	624	1266	61	4.81833	0.601877	546|581|596|638|891|1663|1869|2237|3002|3265|4297|4751|5202|5216|5581|5902|6385|6790|7429|8655|8867|9001|9141|9212|9555|9646|9700|9908|10015|10105|10456|10615|10856|10962|11065|11284|22843|22930|22933|25886|25942|26147|26355|51203|51433|51529|54737|55011|55187|55823|57026|57606|59286|79035|79443|81620|84722|93624|140609|221477|348110	ATRX|BAX|BCL2|BIK|CCNB1|DDX11|E2F1|FEN1|GZMB|HRAS|KMT2A|NEK2|PFDN2|PFN1|PRKCE|RANBP1|SDC4|AURKA|VIL1|DYNLL1|SYNJ1|HAP1|PDCD5|AURKB|MACROH2A1|CTR9|ESPL1|G3BP2|PDCD6IP|PPIF|HAX1|SPAG5|RUVBL2|MLLT11|UBE2C|PNKP|PPM1E|RAB3GAP1|SIRT2|POC1A|SIN3A|PHF19|FAM162A|NUSAP1|ANAPC5|ANAPC11|MPHOSPH8|PIH1D1|VPS13D|VPS11|PDXP|SLAIN2|UBL5|NABP2|FYCO1|CDT1|PSRC1|TADA2B|NEK7|C6orf89|ARPIN	-3.37156	0	17	1	1	-5.64786	2.52204
1	-5.57898	GO:0050684	M1	1	0	GO Biological Processes	19	regulation of mRNA processing	-5.57898	3.06391	5.69744	24155	137	1266	22	1.73776	0.367258	891|3167|3191|6427|6651|8106|8683|9646|9967|10150|10179|10659|10768|10929|11189|23210|23543|26528|79171|84530|135295|283375	CCNB1|HMX2|HNRNPL|SRSF2|SON|PABPN1|SRSF9|CTR9|THRAP3|MBNL2|RBM7|CELF2|AHCYL1|SRSF8|CELF3|JMJD6|RBFOX2|DAZAP1|RBM42|SRRM4|SRSF12|SLC39A5	-3.30782	0	18	1	1	-5.57898	3.52242
1	-5.53981	GO:0032990	M1	1	0	GO Biological Processes	19	cell part morphogenesis	-5.53981	1.81049	5.06098	24155	685	1266	65	5.13428	0.620265	288|538|581|596|816|1136|1141|1501|1956|1969|2046|2050|2115|2664|2803|3475|3730|3800|3913|3925|4009|4628|4851|4983|5797|5979|6239|6474|6790|6860|7337|7429|7477|8301|9048|9355|9378|9637|10048|10087|10381|10512|22941|23077|23542|23543|25806|25942|29993|50618|50674|51177|51188|56896|57498|59277|80128|80208|84446|84612|84628|115703|347733|348110|375790	ANK3|ATP7A|BAX|BCL2|CAMK2B|CHRNA3|CHRNB2|CTNND2|EGFR|EPHA2|EPHA8|EPHB4|ETV1|GDI1|GOLGA4|IFRD1|ANOS1|KIF5C|LAMB2|STMN1|LMX1A|MYH10|NOTCH1|OPHN1|PTPRM|RET|RREB1|SHOX2|AURKA|SYT4|UBE3A|VIL1|WNT7B|PICALM|ARTN|LHX2|NRXN1|FEZ2|RANBP9|CERT1|TUBB3|SEMA3C|SHANK2|MYCBP2|MAPK8IP2|RBFOX2|VAX2|SIN3A|PACSIN1|ITSN2|NEUROG3|PLEKHO1|SS18L2|DPYSL5|KIDINS220|NTN4|TRIM46|SPG11|BRSK1|PARD6B|NTNG2|ARHGAP33|TUBB2B|ARPI…	-3.27373	0	19	1	1	-5.53981	1.81575
1	-5.52318	GO:0048024	M1	1	0	GO Biological Processes	19	regulation of mRNA splicing, via spliceosome	-5.52318	3.50445	5.84255	24155	98	1266	18	1.4218	0.332731	3167|3191|6427|6651|8683|9967|10150|10179|10659|10929|11189|23210|23543|26528|79171|84530|135295|283375	HMX2|HNRNPL|SRSF2|SON|SRSF9|THRAP3|MBNL2|RBM7|CELF2|SRSF8|CELF3|JMJD6|RBFOX2|DAZAP1|RBM42|SRRM4|SRSF12|SLC39A5	-3.26212	0	18	0	0	-5.57898	3.52242
1	-5.50342	GO:0006336	M1	1	0	GO Biological Processes	19	DNA replication-independent nucleosome assembly	-5.50342	4.59328	6.21682	24155	54	1266	13	1.02686	0.283333	546|1058|8363|11339|29855|55355|55723|55839|64946|79019|79682|387103|401541	ATRX|CENPA|H4C11|OIP5|UBN1|HJURP|ASF1B|CENPN|CENPH|CENPM|CENPU|CENPW|CENPP	-3.24733	0	7	0	0	-9.46648	6.35993
1	-5.48223	GO:0000910	M1	1	0	GO Biological Processes	19	cytokinesis	-5.48223	2.78944	5.52272	24155	171	1266	25	1.97472	0.391026	288|324|994|1058|3925|4628|5300|5347|5581|6651|6790|9055|9094|9101|9212|9700|10015|24137|51203|55165|57026|79187|81620|112574|257364	ANK3|APC|CDC25B|CENPA|STMN1|MYH10|PIN1|PLK1|PRKCE|SON|AURKA|PRC1|UNC119|USP8|AURKB|ESPL1|PDCD6IP|KIF4A|NUSAP1|CEP55|PDXP|FSD1|CDT1|SNX18|SNX33	-3.23104	0	12	0	0	-6.78067	4.44324
1	-5.47165	GO:0008608	M1	1	0	GO Biological Processes	19	attachment of spindle microtubules to kinetochore	-5.47165	5.96243	6.6062	24155	32	1266	10	0.789889	0.248796	324|891|4751|9212|10403|10615|11004|22933|81620|83540	APC|CCNB1|NEK2|AURKB|NDC80|SPAG5|KIF2C|SIRT2|CDT1|NUF2	-3.22532	0	20	1	1	-5.47165	7.94991
1	-5.43536	GO:0007062	M1	1	0	GO Biological Processes	19	sister chromatid cohesion	-5.43536	4.23995	6.05578	24155	63	1266	14	1.10585	0.293911	546|991|1663|2237|5347|5889|9555|9700|9985|23244|79075|83903|157570|440081	ATRX|CDC20|DDX11|FEN1|PLK1|RAD51C|MACROH2A1|ESPL1|REC8|PDS5A|DSCC1|HASPIN|ESCO2|DDX12P	-3.19382	0	21	1	1	-5.43536	4.97733
1	-5.42884	GO:0120039	M1	1	0	GO Biological Processes	19	plasma membrane bounded cell projection morphogenesis	-5.42884	1.81575	5.00512	24155	662	1266	63	4.9763	0.611157	288|538|596|816|1136|1141|1501|1956|1969|2046|2050|2115|2664|2803|3475|3730|3800|3913|3925|4009|4628|4851|4983|5797|5979|6239|6474|6790|6860|7337|7429|7477|8301|9048|9355|9378|9637|10048|10381|10512|22941|23077|23542|23543|25806|25942|29993|50618|50674|51177|51188|56896|57498|59277|80128|80208|84446|84612|84628|115703|347733|348110|375790	ANK3|ATP7A|BCL2|CAMK2B|CHRNA3|CHRNB2|CTNND2|EGFR|EPHA2|EPHA8|EPHB4|ETV1|GDI1|GOLGA4|IFRD1|ANOS1|KIF5C|LAMB2|STMN1|LMX1A|MYH10|NOTCH1|OPHN1|PTPRM|RET|RREB1|SHOX2|AURKA|SYT4|UBE3A|VIL1|WNT7B|PICALM|ARTN|LHX2|NRXN1|FEZ2|RANBP9|TUBB3|SEMA3C|SHANK2|MYCBP2|MAPK8IP2|RBFOX2|VAX2|SIN3A|PACSIN1|ITSN2|NEUROG3|PLEKHO1|SS18L2|DPYSL5|KIDINS220|NTN4|TRIM46|SPG11|BRSK1|PARD6B|NTNG2|ARHGAP33|TUBB2B|ARPIN|AGRN	-3.19205	0	19	0	0	-5.53981	1.81575
1	-5.40753	GO:0034724	M1	1	0	GO Biological Processes	19	DNA replication-independent nucleosome organization	-5.40753	4.50977	6.12843	24155	55	1266	13	1.02686	0.283333	546|1058|8363|11339|29855|55355|55723|55839|64946|79019|79682|387103|401541	ATRX|CENPA|H4C11|OIP5|UBN1|HJURP|ASF1B|CENPN|CENPH|CENPM|CENPU|CENPW|CENPP	-3.17543	0	7	0	0	-9.46648	6.35993
1	-5.39297	GO:0061640	M1	1	0	GO Biological Processes	19	cytoskeleton-dependent cytokinesis	-5.39297	3.43436	5.73694	24155	100	1266	18	1.4218	0.332731	288|324|1058|3925|4628|5347|6651|9094|9101|9212|9700|10015|24137|51203|55165|81620|112574|257364	ANK3|APC|CENPA|STMN1|MYH10|PLK1|SON|UNC119|USP8|AURKB|ESPL1|PDCD6IP|KIF4A|NUSAP1|CEP55|CDT1|SNX18|SNX33	-3.16552	0	12	0	0	-6.78067	4.44324
1	-5.38077	GO:0032508	M1	1	0	GO Biological Processes	19	DNA duplex unwinding	-5.38077	3.2956	5.67516	24155	110	1266	19	1.50079	0.341711	546|1106|1663|2074|4176|5888|5982|5984|8318|9401|9837|10721|10856|25788|51659|79075|80119|80205|440081	ATRX|CHD2|DDX11|ERCC6|MCM7|RAD51|RFC2|RFC4|CDC45|RECQL4|GINS1|POLQ|RUVBL2|RAD54B|GINS2|DSCC1|PIF1|CHD9|DDX12P	-3.15791	0	3	0	0	-13.2963	6.67792
1	-5.34426	GO:0048858	M1	1	0	GO Biological Processes	19	cell projection morphogenesis	-5.34426	1.80484	4.95353	24155	666	1266	63	4.9763	0.611157	288|538|596|816|1136|1141|1501|1956|1969|2046|2050|2115|2664|2803|3475|3730|3800|3913|3925|4009|4628|4851|4983|5797|5979|6239|6474|6790|6860|7337|7429|7477|8301|9048|9355|9378|9637|10048|10381|10512|22941|23077|23542|23543|25806|25942|29993|50618|50674|51177|51188|56896|57498|59277|80128|80208|84446|84612|84628|115703|347733|348110|375790	ANK3|ATP7A|BCL2|CAMK2B|CHRNA3|CHRNB2|CTNND2|EGFR|EPHA2|EPHA8|EPHB4|ETV1|GDI1|GOLGA4|IFRD1|ANOS1|KIF5C|LAMB2|STMN1|LMX1A|MYH10|NOTCH1|OPHN1|PTPRM|RET|RREB1|SHOX2|AURKA|SYT4|UBE3A|VIL1|WNT7B|PICALM|ARTN|LHX2|NRXN1|FEZ2|RANBP9|TUBB3|SEMA3C|SHANK2|MYCBP2|MAPK8IP2|RBFOX2|VAX2|SIN3A|PACSIN1|ITSN2|NEUROG3|PLEKHO1|SS18L2|DPYSL5|KIDINS220|NTN4|TRIM46|SPG11|BRSK1|PARD6B|NTNG2|ARHGAP33|TUBB2B|ARPIN|AGRN	-3.12596	0	19	0	0	-5.53981	1.81575
1	-5.26216	GO:0006323	M1	1	0	GO Biological Processes	19	DNA packaging	-5.26216	2.54397	5.28493	24155	210	1266	28	2.21169	0.413322	546|891|983|1058|3014|3148|8345|8352|8363|8968|8971|9555|10036|11339|23397|29781|29855|51203|55355|55723|55839|55870|64151|64946|79019|79682|387103|401541	ATRX|CCNB1|CDK1|CENPA|H2AX|HMGB2|H2BC9|H3C3|H4C11|H3C7|H1-10|MACROH2A1|CHAF1A|OIP5|NCAPH|NCAPH2|UBN1|NUSAP1|HJURP|ASF1B|CENPN|ASH1L|NCAPG|CENPH|CENPM|CENPU|CENPW|CENPP	-3.04836	0	7	0	0	-9.46648	6.35993
1	-5.25	GO:0071695	M1	1	0	GO Biological Processes	19	anatomical structure maturation	-5.25	2.77524	5.38124	24155	165	1266	24	1.89573	0.38328	372|596|718|891|994|2046|2261|5241|5979|6790|7298|8941|9319|9985|22933|26057|26271|51083|51286|54738|59277|79633|84530|375790	ARCN1|BCL2|C3|CCNB1|CDC25B|EPHA8|FGFR3|PGR|RET|AURKA|TYMS|CDK5R2|TRIP13|REC8|SIRT2|ANKRD17|FBXO5|GAL|CEND1|FEV|NTN4|FAT4|SRRM4|AGRN	-3.04065	0	11	0	0	-6.94498	3.24762
1	-5.20528	GO:0007094	M1	1	0	GO Biological Processes	19	mitotic spindle assembly checkpoint	-5.20528	5.6117	6.3285	24155	34	1266	10	0.789889	0.248796	324|891|991|4085|5347|9183|9212|9319|10403|81620	APC|CCNB1|CDC20|MAD2L1|PLK1|ZW10|AURKB|TRIP13|NDC80|CDT1	-3.0133	0	6	0	0	-10.0764	6.73404
1	-5.20528	GO:0031577	M1	1	0	GO Biological Processes	19	spindle checkpoint	-5.20528	5.6117	6.3285	24155	34	1266	10	0.789889	0.248796	324|891|991|4085|5347|9183|9212|9319|10403|81620	APC|CCNB1|CDC20|MAD2L1|PLK1|ZW10|AURKB|TRIP13|NDC80|CDT1	-3.0133	0	6	0	0	-10.0764	6.73404
1	-5.20528	GO:0071173	M1	1	0	GO Biological Processes	19	spindle assembly checkpoint	-5.20528	5.6117	6.3285	24155	34	1266	10	0.789889	0.248796	324|891|991|4085|5347|9183|9212|9319|10403|81620	APC|CCNB1|CDC20|MAD2L1|PLK1|ZW10|AURKB|TRIP13|NDC80|CDT1	-3.0133	0	6	0	0	-10.0764	6.73404
1	-5.20528	GO:0071174	M1	1	0	GO Biological Processes	19	mitotic spindle checkpoint	-5.20528	5.6117	6.3285	24155	34	1266	10	0.789889	0.248796	324|891|991|4085|5347|9183|9212|9319|10403|81620	APC|CCNB1|CDC20|MAD2L1|PLK1|ZW10|AURKB|TRIP13|NDC80|CDT1	-3.0133	0	6	0	0	-10.0764	6.73404
1	-5.18366	GO:0000724	M1	1	0	GO Biological Processes	19	double-strand break repair via homologous recombination	-5.18366	2.99011	5.43292	24155	134	1266	21	1.65877	0.358958	2237|3014|4176|5531|5888|5889|7979|8318|8438|8914|9401|9985|10635|10721|25788|51659|55010|55135|79035|149840|375757	FEN1|H2AX|MCM7|PPP4C|RAD51|RAD51C|SEM1|CDC45|RAD54L|TIMELESS|RECQL4|REC8|RAD51AP1|POLQ|RAD54B|GINS2|PARPBP|WRAP53|NABP2|SHLD1|SWI5	-2.99593	0	4	0	0	-10.2453	3.39196
1	-5.15684	GO:0051603	M1	1	0	GO Biological Processes	19	proteolysis involved in cellular protein catabolic process	-5.15684	1.75385	4.82275	24155	718	1266	66	5.21327	0.624758	329|824|891|899|983|991|997|1519|3077|4085|4983|5347|5611|5688|5691|5692|5694|5704|5719|5886|6449|6790|6921|7110|7337|8065|8192|8945|9101|9212|9232|9354|9655|9683|9695|10015|10277|11047|11065|11267|22933|23304|23640|25820|26046|26224|26271|27252|27338|28952|29761|51433|51434|51449|51529|51684|55743|55872|57646|80196|83752|144165|153769|197131|440730|493829	BIRC2|CAPN2|CCNB1|CCNF|CDK1|CDC20|CDC34|CTSO|HFE|MAD2L1|OPHN1|PLK1|DNAJC3|PSMA7|PSMB3|PSMB4|PSMB6|PSMC4|PSMD13|RAD23A|SGTA|AURKA|ELOC|TMF1|UBE3A|CUL5|CLPP|BTRC|USP8|AURKB|PTTG1|UBE4A|SOCS5|N4BP1|EDEM1|PDCD6IP|UBE4B|ADRM1|UBE2C|SNF8|SIRT2|UBR2|HSPBP1|ARIH1|LTN1|FBXL3|FBXO5|KLHL20|UBE2S|CCDC22|USP25|ANAPC5|ANAPC7|PCYOX1|ANAPC11|SUFU|CHFR|PBK|USP28|RNF34|LONP2|PRICKLE1|SH3RF2|UBR1|TRIM67|TRIM72	-2.97329	0	14	0	0	-6.44798	2.55948
1	-5.13191	GO:0000725	M1	1	0	GO Biological Processes	19	recombinational repair	-5.13191	2.96797	5.39257	24155	135	1266	21	1.65877	0.358958	2237|3014|4176|5531|5888|5889|7979|8318|8438|8914|9401|9985|10635|10721|25788|51659|55010|55135|79035|149840|375757	FEN1|H2AX|MCM7|PPP4C|RAD51|RAD51C|SEM1|CDC45|RAD54L|TIMELESS|RECQL4|REC8|RAD51AP1|POLQ|RAD54B|GINS2|PARPBP|WRAP53|NABP2|SHLD1|SWI5	-2.95252	0	4	0	0	-10.2453	3.39196
1	-5.09181	GO:0051984	M1	1	0	GO Biological Processes	19	positive regulation of chromosome segregation	-5.09181	6.13279	6.39114	24155	28	1266	9	0.7109	0.236123	891|1663|2237|9555|9700|22933|51433|51529|81620	CCNB1|DDX11|FEN1|MACROH2A1|ESPL1|SIRT2|ANAPC5|ANAPC11|CDT1	-2.91654	0	22	1	1	-5.09181	8.4799
1	-4.95108	GO:0000083	M1	1	0	GO Biological Processes	19	regulation of transcription involved in G1/S transition of mitotic cell cycle	-4.95108	5.92131	6.23642	24155	29	1266	9	0.7109	0.236123	1869|3398|4863|5111|6241|7298|8318|26271|81620	E2F1|ID2|NPAT|PCNA|RRM2|TYMS|CDC45|FBXO5|CDT1	-2.77989	0	23	1	1	-4.95108	5.92131
1	-4.93716	GO:0044257	M1	1	0	GO Biological Processes	19	cellular protein catabolic process	-4.93716	1.70311	4.67273	24155	773	1266	69	5.45024	0.638001	329|824|891|899|983|991|997|1175|1519|3077|4085|4983|5347|5611|5688|5691|5692|5694|5704|5719|5886|5962|6449|6790|6921|7110|7337|8065|8192|8945|9101|9212|9232|9354|9655|9683|9695|10015|10277|11047|11065|11267|22933|23304|23640|25820|26046|26224|26271|27252|27338|28952|29761|51433|51434|51449|51529|51684|55743|55823|55872|57646|80196|83752|144165|153769|197131|440730|493829	BIRC2|CAPN2|CCNB1|CCNF|CDK1|CDC20|CDC34|AP2S1|CTSO|HFE|MAD2L1|OPHN1|PLK1|DNAJC3|PSMA7|PSMB3|PSMB4|PSMB6|PSMC4|PSMD13|RAD23A|RDX|SGTA|AURKA|ELOC|TMF1|UBE3A|CUL5|CLPP|BTRC|USP8|AURKB|PTTG1|UBE4A|SOCS5|N4BP1|EDEM1|PDCD6IP|UBE4B|ADRM1|UBE2C|SNF8|SIRT2|UBR2|HSPBP1|ARIH1|LTN1|FBXL3|FBXO5|KLHL20|UBE2S|CCDC22|USP25|ANAPC5|ANAPC7|PCYOX1|ANAPC11|SUFU|CHFR|VPS11|PBK|USP28|RNF34|LONP2|PRICKLE1|SH3RF2|UBR1|TR…	-2.77001	0	14	0	0	-6.44798	2.55948
1	-4.93141	GO:0000375	M1	1	0	GO Biological Processes	19	RNA splicing, via transesterification reactions	-4.93141	2.04783	4.85488	24155	382	1266	41	3.23855	0.497519	1479|3167|3191|5437|5439|5440|6427|6628|6632|6636|6637|6651|8106|8683|8896|9967|10150|10179|10189|10212|10465|10659|10907|10929|11189|23210|23543|26121|26528|27257|55110|59286|79005|79171|79622|79760|83443|84530|135295|143884|283375	CSTF3|HMX2|HNRNPL|POLR2H|POLR2J|POLR2K|SRSF2|SNRPB|SNRPD1|SNRPF|SNRPG|SON|PABPN1|SRSF9|BUD31|THRAP3|MBNL2|RBM7|ALYREF|DDX39A|PPIH|CELF2|TXNL4A|SRSF8|CELF3|JMJD6|RBFOX2|PRPF31|DAZAP1|LSM1|MAGOHB|UBL5|SCNM1|RBM42|SNRNP25|GEMIN7|SF3B5|SRRM4|SRSF12|CWF19L2|SLC39A5	-2.76888	0	18	0	0	-5.57898	3.52242
1	-4.92807	GO:0035690	M1	1	0	GO Biological Processes	19	cellular response to drug	-4.92807	2.06827	4.8633	24155	369	1266	40	3.15956	0.491614	196|546|558|890|983|1019|1136|1141|1495|1535|1644|1663|1956|1978|2146|2348|2776|2822|3746|3757|4297|4548|4830|5106|5111|5141|5581|5888|7098|7186|7226|8914|9101|10105|11255|22843|25942|26291|57026|375790	AHR|ATRX|AXL|CCNA2|CDK1|CDK4|CHRNA3|CHRNB2|CTNNA1|CYBA|DDC|DDX11|EGFR|EIF4EBP1|EZH2|FOLR1|GNAQ|GPLD1|KCNC1|KCNH2|KMT2A|MTR|NME1|PCK2|PCNA|PDE4A|PRKCE|RAD51|TLR3|TRAF2|TRPM2|TIMELESS|USP8|PPIF|HRH3|PPM1E|SIN3A|FGF21|PDXP|AGRN	-2.76888	0	24	1	1	-4.92807	2.06827
1	-4.90815	GO:0006275	M1	1	0	GO Biological Processes	19	regulation of DNA replication	-4.90815	3.17996	5.33984	24155	108	1266	18	1.4218	0.332731	546|890|983|1956|3060|3265|5111|5982|5984|8914|23244|26057|26271|57418|79075|80174|81620|157570	ATRX|CCNA2|CDK1|EGFR|HCRT|HRAS|PCNA|RFC2|RFC4|TIMELESS|PDS5A|ANKRD17|FBXO5|WDR18|DSCC1|DBF4B|CDT1|ESCO2	-2.7529	0	25	1	1	-4.90815	3.70996
1	-4.89693	GO:0006310	M1	1	0	GO Biological Processes	19	DNA recombination	-4.89693	2.21404	4.91711	24155	293	1266	34	2.68562	0.454354	2237|3014|3148|3838|4176|5531|5888|5889|7979|8318|8438|8914|8971|9319|9401|9985|10189|10445|10635|10721|10856|23304|25788|29844|29893|51659|55010|55135|79035|80119|84057|146956|149840|375757	FEN1|H2AX|HMGB2|KPNA2|MCM7|PPP4C|RAD51|RAD51C|SEM1|CDC45|RAD54L|TIMELESS|H1-10|TRIP13|RECQL4|REC8|ALYREF|MCRS1|RAD51AP1|POLQ|RUVBL2|UBR2|RAD54B|TFPT|PSMC3IP|GINS2|PARPBP|WRAP53|NABP2|PIF1|MND1|EME1|SHLD1|SWI5	-2.74557	0	4	0	0	-10.2453	3.39196
1	-4.88157	GO:0007623	M1	1	0	GO Biological Processes	19	circadian rhythm	-4.88157	2.4767	5.03034	24155	208	1266	27	2.1327	0.406038	196|983|1019|1141|1408|1644|1956|2146|2776|3398|4297|4704|4862|6839|6928|7166|7298|7337|8863|8914|8945|9967|23077|25942|26224|121278|220202	AHR|CDK1|CDK4|CHRNB2|CRY2|DDC|EGFR|EZH2|GNAQ|ID2|KMT2A|NDUFA9|NPAS2|SUV39H1|HNF1B|TPH1|TYMS|UBE3A|PER3|TIMELESS|BTRC|THRAP3|MYCBP2|SIN3A|FBXL3|TPH2|ATOH7	-2.73407	0	26	1	1	-4.88157	4.23995
1	-4.84158	GO:0007077	M1	1	0	GO Biological Processes	19	mitotic nuclear envelope disassembly	-4.84158	9.53989	6.95897	24155	12	1266	6	0.473934	0.193024	891|983|5347|7443|9133|91754	CCNB1|CDK1|PLK1|VRK1|CCNB2|NEK9	-2.69791	0	27	1	1	-4.84158	9.53989
1	-4.77746	GO:0051347	M1	1	0	GO Biological Processes	19	positive regulation of transferase activity	-4.77746	1.7585	4.61398	24155	651	1266	60	4.73934	0.597171	115|796|891|983|991|994|1136|1164|1432|1956|2046|2074|2146|2261|2914|3265|3570|4294|4739|4751|5170|5300|5347|5585|5605|5608|5979|5982|5984|6385|7098|7186|7477|8106|8525|8941|9052|9094|9148|9212|9748|9966|10253|10912|11065|11214|11284|22974|27338|51347|54106|55011|55135|57498|65125|79075|80174|84722|84962|140609	ADCY9|CALCA|CCNB1|CDK1|CDC20|CDC25B|CHRNA3|CKS2|MAPK14|EGFR|EPHA8|ERCC6|EZH2|FGFR3|GRM4|HRAS|IL6R|MAP3K10|NEDD9|NEK2|PDPK1|PIN1|PLK1|PKN1|MAP2K2|MAP2K6|RET|RFC2|RFC4|SDC4|TLR3|TRAF2|WNT7B|PABPN1|DGKZ|CDK5R2|GPRC5A|UNC119|NEURL1|AURKB|SLK|TNFSF15|SPRY2|GADD45G|UBE2C|AKAP13|PNKP|TPX2|UBE2S|TAOK3|TLR9|PIH1D1|WRAP53|KIDINS220|WNK1|DSCC1|DBF4B|PSRC1|AJUBA|NEK7	-2.63758	0	28	1	1	-4.77746	1.83813
1	-4.75763	GO:1901699	M1	1	0	GO Biological Processes	19	cellular response to nitrogen compound	-4.75763	1.75581	4.6012	24155	652	1266	60	4.73934	0.597171	115|196|324|534|538|546|688|773|824|837|858|890|1019|1136|1141|1495|1535|1644|1663|1729|1956|1978|1979|2146|2348|2776|2822|3843|4141|4548|5106|5170|5286|5888|6472|7098|7186|7226|8615|8914|9148|9296|10603|10661|10768|11255|22933|23235|23304|25942|26291|29988|55777|57026|64397|132864|155066|197131|375790|493829	ADCY9|AHR|APC|ATP6V1G2|ATP7A|ATRX|KLF5|CACNA1A|CAPN2|CASP4|CAV2|CCNA2|CDK4|CHRNA3|CHRNB2|CTNNA1|CYBA|DDC|DDX11|DIAPH1|EGFR|EIF4EBP1|EIF4EBP2|EZH2|FOLR1|GNAQ|GPLD1|IPO5|MARS1|MTR|PCK2|PDPK1|PIK3C2A|RAD51|SHMT2|TLR3|TRAF2|TRPM2|USO1|TIMELESS|NEURL1|ATP6V1F|SH2B2|KLF1|AHCYL1|HRH3|SIRT2|SIK2|UBR2|SIN3A|FGF21|SLC2A8|MBD5|PDXP|ZNF106|CPEB2|ATP6V0E2|UBR1|AGRN|TRIM72	-2.62152	0	29	1	1	-4.75763	2.00138
1	-4.74171	GO:0065004	M1	1	0	GO Biological Processes	19	protein-DNA complex assembly	-4.74171	2.30804	4.86947	24155	248	1266	30	2.36967	0.427483	546|1058|3014|3148|4176|5704|5888|6928|8318|8345|8352|8363|8968|8971|9328|9555|10036|11339|29855|55011|55355|55723|55839|64946|79019|79682|81620|375757|387103|401541	ATRX|CENPA|H2AX|HMGB2|MCM7|PSMC4|RAD51|HNF1B|CDC45|H2BC9|H3C3|H4C11|H3C7|H1-10|GTF3C5|MACROH2A1|CHAF1A|OIP5|UBN1|PIH1D1|HJURP|ASF1B|CENPN|CENPH|CENPM|CENPU|CDT1|SWI5|CENPW|CENPP	-2.60932	0	7	0	0	-9.46648	6.35993
1	-4.72472	GO:1905114	M1	1	0	GO Biological Processes	19	cell surface receptor signaling pathway involved in cell-cell signaling	-4.72472	1.7706	4.59048	24155	625	1266	58	4.58136	0.58762	324|558|718|861|1136|1138|1141|1175|1432|1500|1501|1956|2348|2776|2870|2905|3060|4163|4851|5026|5216|5300|5688|5691|5692|5694|5704|5719|6497|6928|6934|7097|7477|8796|8945|9101|9350|9378|9646|10076|10856|22930|22941|23542|25806|51384|51421|55584|55789|65125|85458|124925|130612|144165|192670|205147|283149|441478	APC|AXL|C3|RUNX1|CHRNA3|CHRNA5|CHRNB2|AP2S1|MAPK14|CTNND1|CTNND2|EGFR|FOLR1|GNAQ|GRK6|GRIN2C|HCRT|MCC|NOTCH1|P2RX5|PFN1|PIN1|PSMA7|PSMB3|PSMB4|PSMB6|PSMC4|PSMD13|SKI|HNF1B|TCF7L2|TLR2|WNT7B|SCEL|BTRC|USP8|CER1|NRXN1|CTR9|PTPRU|RUVBL2|RAB3GAP1|SHANK2|MAPK8IP2|VAX2|WNT16|AMOTL2|CHRNA9|DEPDC1B|WNK1|DIXDC1|SEZ6|TMEM198|PRICKLE1|AGO4|AMER3|BCL9L|NRARP	-2.59602	0	30	1	1	-4.72472	1.80124
1	-4.69967	GO:0051052	M1	1	0	GO Biological Processes	19	regulation of DNA metabolic process	-4.69967	1.94782	4.66948	24155	431	1266	44	3.47551	0.514768	143|546|581|890|983|1054|1663|1956|2074|3014|3060|3265|3838|4297|4751|4862|5111|5531|5888|5982|5984|8914|8971|9212|10189|10635|10721|11284|23244|26057|26271|53615|54737|55010|55135|57418|79035|79075|80119|80174|81620|140609|149840|157570	PARP4|ATRX|BAX|CCNA2|CDK1|CEBPG|DDX11|EGFR|ERCC6|H2AX|HCRT|HRAS|KPNA2|KMT2A|NEK2|NPAS2|PCNA|PPP4C|RAD51|RFC2|RFC4|TIMELESS|H1-10|AURKB|ALYREF|RAD51AP1|POLQ|PNKP|PDS5A|ANKRD17|FBXO5|MBD3|MPHOSPH8|PARPBP|WRAP53|WDR18|NABP2|DSCC1|PIF1|DBF4B|CDT1|NEK7|SHLD1|ESCO2	-2.57828	0	4	0	0	-10.2453	3.39196
1	-4.70091	GO:0016050	M1	1	0	GO Biological Processes	19	vesicle organization	-4.70091	2.11345	4.7528	24155	325	1266	36	2.8436	0.467147	596|858|966|1759|2348|5873|6385|6616|6855|6860|7110|8301|8615|8867|9101|9341|10015|10113|10228|10254|10814|11196|11267|22872|23682|26271|29916|51479|55111|55823|80208|149371|254263|257364|399979|594855	BCL2|CAV2|CD59|DNM1|FOLR1|RAB27A|SDC4|SNAP25|SYP|SYT4|TMF1|PICALM|USO1|SYNJ1|USP8|VAMP3|PDCD6IP|PREB|STX6|STAM2|CPLX2|SEC23IP|SNF8|SEC31A|RAB38|FBXO5|SNX11|ANKFY1|PLEKHJ1|VPS11|SPG11|EXOC8|CNIH2|SNX33|SNX19|CPLX3	-2.57828	0	10	0	0	-7.30707	2.89819
1	-4.69031	GO:0048268	M1	1	0	GO Biological Processes	19	clathrin coat assembly	-4.69031	7.41991	6.40799	24155	18	1266	7	0.552923	0.208407	1175|3092|5286|8301|50632|51617|115548	AP2S1|HIP1|PIK3C2A|PICALM|CALY|NSG2|FCHO2	-2.57427	0	31	1	1	-4.69031	7.41991
1	-4.68849	GO:0007143	M1	1	0	GO Biological Processes	19	female meiotic nuclear division	-4.68849	5.53929	5.94761	24155	31	1266	9	0.7109	0.236123	994|5347|5889|6790|9319|9665|23397|26271|29781	CDC25B|PLK1|RAD51C|AURKA|TRIP13|MARF1|NCAPH|FBXO5|NCAPH2	-2.57427	0	32	1	1	-4.68849	9.53989
1	-4.65753	GO:0000377	M1	1	0	GO Biological Processes	19	RNA splicing, via transesterification reactions with bulged adenosine as nucleophile	-4.65753	2.0137	4.67796	24155	379	1266	40	3.15956	0.491614	1479|3167|3191|5437|5439|5440|6427|6628|6632|6636|6637|6651|8106|8683|8896|9967|10150|10179|10189|10212|10465|10659|10907|10929|11189|23210|23543|26121|26528|55110|59286|79005|79171|79622|79760|83443|84530|135295|143884|283375	CSTF3|HMX2|HNRNPL|POLR2H|POLR2J|POLR2K|SRSF2|SNRPB|SNRPD1|SNRPF|SNRPG|SON|PABPN1|SRSF9|BUD31|THRAP3|MBNL2|RBM7|ALYREF|DDX39A|PPIH|CELF2|TXNL4A|SRSF8|CELF3|JMJD6|RBFOX2|PRPF31|DAZAP1|MAGOHB|UBL5|SCNM1|RBM42|SNRNP25|GEMIN7|SF3B5|SRRM4|SRSF12|CWF19L2|SLC39A5	-2.55038	0	18	0	0	-5.57898	3.52242
1	-4.65753	GO:0000398	M1	1	0	GO Biological Processes	19	mRNA splicing, via spliceosome	-4.65753	2.0137	4.67796	24155	379	1266	40	3.15956	0.491614	1479|3167|3191|5437|5439|5440|6427|6628|6632|6636|6637|6651|8106|8683|8896|9967|10150|10179|10189|10212|10465|10659|10907|10929|11189|23210|23543|26121|26528|55110|59286|79005|79171|79622|79760|83443|84530|135295|143884|283375	CSTF3|HMX2|HNRNPL|POLR2H|POLR2J|POLR2K|SRSF2|SNRPB|SNRPD1|SNRPF|SNRPG|SON|PABPN1|SRSF9|BUD31|THRAP3|MBNL2|RBM7|ALYREF|DDX39A|PPIH|CELF2|TXNL4A|SRSF8|CELF3|JMJD6|RBFOX2|PRPF31|DAZAP1|MAGOHB|UBL5|SCNM1|RBM42|SNRNP25|GEMIN7|SF3B5|SRRM4|SRSF12|CWF19L2|SLC39A5	-2.55038	0	18	0	0	-5.57898	3.52242
1	-4.64505	GO:0006334	M1	1	0	GO Biological Processes	19	nucleosome assembly	-4.64505	2.76328	5.00849	24155	145	1266	21	1.65877	0.358958	546|1058|3014|3148|8345|8352|8363|8968|8971|9555|10036|11339|29855|55355|55723|55839|64946|79019|79682|387103|401541	ATRX|CENPA|H2AX|HMGB2|H2BC9|H3C3|H4C11|H3C7|H1-10|MACROH2A1|CHAF1A|OIP5|UBN1|HJURP|ASF1B|CENPN|CENPH|CENPM|CENPU|CENPW|CENPP	-2.54442	0	7	0	0	-9.46648	6.35993
1	-4.64462	GO:0019941	M1	1	0	GO Biological Processes	19	modification-dependent protein catabolic process	-4.64462	1.75934	4.53824	24155	629	1266	58	4.58136	0.58762	329|891|899|983|991|997|3077|4085|5347|5688|5691|5692|5694|5704|5719|5886|6449|6790|6921|7337|8065|8945|9101|9212|9232|9354|9655|9683|9695|10277|11047|11065|11267|22933|23304|23640|25820|26046|26224|26271|27252|27338|28952|29761|51433|51434|51449|51529|51684|55743|55872|57646|80196|144165|153769|197131|440730|493829	BIRC2|CCNB1|CCNF|CDK1|CDC20|CDC34|HFE|MAD2L1|PLK1|PSMA7|PSMB3|PSMB4|PSMB6|PSMC4|PSMD13|RAD23A|SGTA|AURKA|ELOC|UBE3A|CUL5|BTRC|USP8|AURKB|PTTG1|UBE4A|SOCS5|N4BP1|EDEM1|UBE4B|ADRM1|UBE2C|SNF8|SIRT2|UBR2|HSPBP1|ARIH1|LTN1|FBXL3|FBXO5|KLHL20|UBE2S|CCDC22|USP25|ANAPC5|ANAPC7|PCYOX1|ANAPC11|SUFU|CHFR|PBK|USP28|RNF34|PRICKLE1|SH3RF2|UBR1|TRIM67|TRIM72	-2.54442	0	14	0	0	-6.44798	2.55948
1	-4.6219	GO:0007080	M1	1	0	GO Biological Processes	19	mitotic metaphase plate congression	-4.6219	4.46548	5.59281	24155	47	1266	11	0.868878	0.260836	891|3833|9183|10015|10403|11004|55143|55165|81620|83540|84722	CCNB1|KIFC1|ZW10|PDCD6IP|NDC80|KIF2C|CDCA8|CEP55|CDT1|NUF2|PSRC1	-2.52512	0	20	0	0	-5.47165	7.94991
1	-4.59909	GO:0043484	M1	1	0	GO Biological Processes	19	regulation of RNA splicing	-4.59909	2.82663	5.0053	24155	135	1266	20	1.57978	0.350448	3167|3191|6427|6651|8683|9967|10150|10179|10659|10929|11189|23210|23543|26528|55544|79026|79171|84530|135295|283375	HMX2|HNRNPL|SRSF2|SON|SRSF9|THRAP3|MBNL2|RBM7|CELF2|SRSF8|CELF3|JMJD6|RBFOX2|DAZAP1|RBM38|AHNAK|RBM42|SRRM4|SRSF12|SLC39A5	-2.50572	0	18	0	0	-5.57898	3.52242
1	-4.59331	GO:0009314	M1	1	0	GO Biological Processes	19	response to radiation	-4.59331	1.91223	4.58876	24155	449	1266	45	3.5545	0.520372	440|581|596|602|993|1032|1141|1408|1432|1535|1956|2074|2189|2237|2776|2779|3014|3265|3398|3746|5111|5888|5934|6785|8438|8863|9094|9212|9683|9768|10277|10635|10856|11284|26224|51426|55872|57282|57646|57817|65009|79035|84446|85461|375757	ASNS|BAX|BCL2|BCL3|CDC25A|CDKN2D|CHRNB2|CRY2|MAPK14|CYBA|EGFR|ERCC6|FANCG|FEN1|GNAQ|GNAT1|H2AX|HRAS|ID2|KCNC1|PCNA|RAD51|RBL2|ELOVL4|RAD54L|PER3|UNC119|AURKB|N4BP1|PCLAF|UBE4B|RAD51AP1|RUVBL2|PNKP|FBXL3|POLK|PBK|SLC4A10|USP28|HAMP|NDRG4|NABP2|BRSK1|TANC1|SWI5	-2.50332	0	33	1	1	-4.59331	2.55293
1	-4.57472	GO:0071900	M1	1	0	GO Biological Processes	19	regulation of protein serine/threonine kinase activity	-4.57472	1.83813	4.53947	24155	519	1266	50	3.94945	0.547396	324|890|891|899|983|993|995|1019|1032|1033|1164|1432|1956|2074|2146|2873|2914|3265|3843|4294|5347|5585|5605|5608|5979|7026|7186|7477|8941|9088|9133|9134|9555|10253|10912|11142|11214|11267|51347|54106|55011|57498|65125|79935|80174|81848|84722|84962|161742|200734	APC|CCNA2|CCNB1|CCNF|CDK1|CDC25A|CDC25C|CDK4|CDKN2D|CDKN3|CKS2|MAPK14|EGFR|ERCC6|EZH2|GPS1|GRM4|HRAS|IPO5|MAP3K10|PLK1|PKN1|MAP2K2|MAP2K6|RET|NR2F2|TRAF2|WNT7B|CDK5R2|PKMYT1|CCNB2|CCNE2|MACROH2A1|SPRY2|GADD45G|PKIG|AKAP13|SNF8|TAOK3|TLR9|PIH1D1|KIDINS220|WNK1|CNTD2|DBF4B|SPRY4|PSRC1|AJUBA|SPRED1|SPRED2	-2.48809	0	28	0	0	-4.77746	1.83813
1	-4.55893	GO:0051225	M1	1	0	GO Biological Processes	19	spindle assembly	-4.55893	2.90013	5.00909	24155	125	1266	19	1.50079	0.341711	332|991|3833|4605|4751|5347|6790|9212|10015|10615|22974|23354|24137|26271|55559|93323|115106|140609|387103	BIRC5|CDC20|KIFC1|MYBL2|NEK2|PLK1|AURKA|AURKB|PDCD6IP|SPAG5|TPX2|HAUS5|KIF4A|FBXO5|HAUS7|HAUS8|HAUS1|NEK7|CENPW	-2.47562	0	1	0	0	-24.5586	4.83189
1	-4.55424	GO:0048812	M1	1	0	GO Biological Processes	19	neuron projection morphogenesis	-4.55424	1.7372	4.47377	24155	648	1266	59	4.66035	0.592419	288|538|596|816|1136|1141|1501|1956|1969|2046|2050|2115|2664|2803|3475|3730|3800|3913|3925|4009|4628|4851|4983|5797|5979|6474|6790|6860|7337|7477|8301|9048|9355|9378|9637|10048|10381|10512|22941|23077|23542|23543|25806|25942|29993|50618|50674|51188|56896|57498|59277|80128|80208|84446|84612|84628|115703|347733|375790	ANK3|ATP7A|BCL2|CAMK2B|CHRNA3|CHRNB2|CTNND2|EGFR|EPHA2|EPHA8|EPHB4|ETV1|GDI1|GOLGA4|IFRD1|ANOS1|KIF5C|LAMB2|STMN1|LMX1A|MYH10|NOTCH1|OPHN1|PTPRM|RET|SHOX2|AURKA|SYT4|UBE3A|WNT7B|PICALM|ARTN|LHX2|NRXN1|FEZ2|RANBP9|TUBB3|SEMA3C|SHANK2|MYCBP2|MAPK8IP2|RBFOX2|VAX2|SIN3A|PACSIN1|ITSN2|NEUROG3|SS18L2|DPYSL5|KIDINS220|NTN4|TRIM46|SPG11|BRSK1|PARD6B|NTNG2|ARHGAP33|TUBB2B|AGRN	-2.47424	0	19	0	0	-5.53981	1.81575
1	-4.54004	GO:0023061	M1	1	0	GO Biological Processes	19	signal release	-4.54004	1.88746	4.54456	24155	465	1266	46	3.63349	0.525906	773|1113|1136|1138|1141|1956|2587|2822|2867|2914|3060|3077|4760|5443|5581|6447|6616|6833|6855|6860|6928|6934|7110|7425|7779|8655|8867|9341|9378|9515|9581|9900|10814|11255|22841|22930|26056|51083|51248|56943|64130|65985|84446|222546|399979|594855	CACNA1A|CHGA|CHRNA3|CHRNA5|CHRNB2|EGFR|GALR1|GPLD1|FFAR2|GRM4|HCRT|HFE|NEUROD1|POMC|PRKCE|SCG5|SNAP25|ABCC8|SYP|SYT4|HNF1B|TCF7L2|TMF1|VGF|SLC30A1|DYNLL1|SYNJ1|VAMP3|NRXN1|STXBP5L|PREPL|SV2A|CPLX2|HRH3|RAB11FIP2|RAB3GAP1|RAB11FIP5|GAL|PDZD11|ENY2|LIN7B|AACS|BRSK1|RFX6|SNX19|CPLX3	-2.46332	0	34	1	1	-4.54004	2.1358
1	-4.5268	GO:0045859	M1	1	0	GO Biological Processes	19	regulation of protein kinase activity	-4.5268	1.6539	4.41204	24155	796	1266	69	5.45024	0.638001	115|324|796|890|891|899|983|993|994|995|1019|1032|1033|1136|1164|1432|1956|2074|2146|2776|2873|2914|3265|3570|3843|4294|4739|5170|5347|5585|5605|5608|5611|5979|6385|7026|7098|7186|7477|8941|9052|9088|9094|9133|9134|9148|9555|9655|9748|9966|10253|10912|11142|11214|11267|22843|22974|51347|54106|55011|57498|65125|79935|80174|81848|84722|84962|161742|200734	ADCY9|APC|CALCA|CCNA2|CCNB1|CCNF|CDK1|CDC25A|CDC25B|CDC25C|CDK4|CDKN2D|CDKN3|CHRNA3|CKS2|MAPK14|EGFR|ERCC6|EZH2|GNAQ|GPS1|GRM4|HRAS|IL6R|IPO5|MAP3K10|NEDD9|PDPK1|PLK1|PKN1|MAP2K2|MAP2K6|DNAJC3|RET|SDC4|NR2F2|TLR3|TRAF2|WNT7B|CDK5R2|GPRC5A|PKMYT1|UNC119|CCNB2|CCNE2|NEURL1|MACROH2A1|SOCS5|SLK|TNFSF15|SPRY2|GADD45G|PKIG|AKAP13|SNF8|PPM1E|TPX2|TAOK3|TLR9|PIH1D1|KIDINS220|WNK1|CNTD2|DBF4B|SPRY4|PSRC1|…	-2.45332	0	28	0	0	-4.77746	1.83813
1	-4.51447	GO:0032386	M1	1	0	GO Biological Processes	19	regulation of intracellular transport	-4.51447	1.93042	4.55119	24155	425	1266	43	3.39652	0.509093	288|1138|1141|1432|2040|2664|3265|3843|4946|5170|5605|5962|6855|6860|6934|7260|9001|9141|9341|9515|9581|9648|9695|10113|10204|10456|10615|10814|11142|22930|30846|51308|51512|51684|55486|55823|59286|64062|65009|80128|254263|340146|594855	ANK3|CHRNA5|CHRNB2|MAPK14|STOM|GDI1|HRAS|IPO5|OAZ1|PDPK1|MAP2K2|RDX|SYP|SYT4|TCF7L2|EIPR1|HAP1|PDCD5|VAMP3|STXBP5L|PREPL|GCC2|EDEM1|PREB|NUTF2|HAX1|SPAG5|CPLX2|PKIG|RAB3GAP1|EHD2|REEP2|GTSE1|SUFU|PARL|VPS11|UBL5|RBM26|NDRG4|TRIM46|CNIH2|SLC35D3|CPLX3	-2.44423	0	35	1	1	-4.51447	1.93042
1	-4.50562	GO:0033044	M1	1	0	GO Biological Processes	19	regulation of chromosome organization	-4.50562	2.04624	4.60318	24155	345	1266	37	2.92259	0.473398	324|546|891|991|1663|2237|4085|4297|4751|5347|6497|8318|8971|9183|9212|9232|9319|9555|9646|9700|10403|10460|10856|11284|25942|26147|26271|51433|51529|54737|55011|79035|80119|81620|93624|140609|221477	APC|ATRX|CCNB1|CDC20|DDX11|FEN1|MAD2L1|KMT2A|NEK2|PLK1|SKI|CDC45|H1-10|ZW10|AURKB|PTTG1|TRIP13|MACROH2A1|CTR9|ESPL1|NDC80|TACC3|RUVBL2|PNKP|SIN3A|PHF19|FBXO5|ANAPC5|ANAPC11|MPHOSPH8|PIH1D1|NABP2|PIF1|CDT1|TADA2B|NEK7|C6orf89	-2.43858	0	17	0	0	-5.64786	2.52204
1	-4.47963	GO:0006511	M1	1	0	GO Biological Processes	19	ubiquitin-dependent protein catabolic process	-4.47963	1.74566	4.4346	24155	623	1266	57	4.50237	0.582774	329|891|899|983|991|997|3077|4085|5347|5688|5691|5692|5694|5704|5719|5886|6449|6790|6921|7337|8065|8945|9101|9212|9232|9354|9655|9683|9695|10277|11047|11065|11267|22933|23304|23640|25820|26046|26224|26271|27252|27338|28952|29761|51433|51434|51529|51684|55743|55872|57646|80196|144165|153769|197131|440730|493829	BIRC2|CCNB1|CCNF|CDK1|CDC20|CDC34|HFE|MAD2L1|PLK1|PSMA7|PSMB3|PSMB4|PSMB6|PSMC4|PSMD13|RAD23A|SGTA|AURKA|ELOC|UBE3A|CUL5|BTRC|USP8|AURKB|PTTG1|UBE4A|SOCS5|N4BP1|EDEM1|UBE4B|ADRM1|UBE2C|SNF8|SIRT2|UBR2|HSPBP1|ARIH1|LTN1|FBXL3|FBXO5|KLHL20|UBE2S|CCDC22|USP25|ANAPC5|ANAPC7|ANAPC11|SUFU|CHFR|PBK|USP28|RNF34|PRICKLE1|SH3RF2|UBR1|TRIM67|TRIM72	-2.41577	0	14	0	0	-6.44798	2.55948
1	-4.47597	GO:0099504	M1	1	0	GO Biological Processes	19	synaptic vesicle cycle	-4.47597	2.44613	4.76846	24155	195	1266	25	1.97472	0.391026	1056|1138|1141|1644|1759|4983|5865|5874|6570|6616|6855|6860|8301|8867|9378|9515|9581|9900|10228|10814|22930|29993|84446|115548|594855	CEL|CHRNA5|CHRNB2|DDC|DNM1|OPHN1|RAB3B|RAB27B|SLC18A1|SNAP25|SYP|SYT4|PICALM|SYNJ1|NRXN1|STXBP5L|PREPL|SV2A|STX6|CPLX2|RAB3GAP1|PACSIN1|BRSK1|FCHO2|CPLX3	-2.41527	0	9	0	0	-7.95771	2.44613
1	-4.44796	GO:0040001	M1	1	0	GO Biological Processes	19	establishment of mitotic spindle localization	-4.44796	5.20358	5.68286	24155	33	1266	9	0.7109	0.236123	1058|4085|5347|9183|9700|10253|10403|51203|89958	CENPA|MAD2L1|PLK1|ZW10|ESPL1|SPRY2|NDC80|NUSAP1|SAPCD2	-2.39271	0	6	0	0	-10.0764	6.73404
1	-4.44716	GO:0060627	M1	1	0	GO Biological Processes	19	regulation of vesicle-mediated transport	-4.44716	1.80532	4.44692	24155	539	1266	51	4.02844	0.552615	558|718|1138|1141|1175|1535|1759|3077|3092|3673|4851|4983|5170|5605|5865|5873|5874|5962|6248|6385|6855|6860|7097|7260|8301|8941|9001|9094|9341|9515|9581|10015|10113|10814|11267|22930|23086|28514|29993|30846|50632|51479|55823|57586|65009|91461|124930|192683|254263|257364|594855	AXL|C3|CHRNA5|CHRNB2|AP2S1|CYBA|DNM1|HFE|HIP1|ITGA2|NOTCH1|OPHN1|PDPK1|MAP2K2|RAB3B|RAB27A|RAB27B|RDX|RSC1A1|SDC4|SYP|SYT4|TLR2|EIPR1|PICALM|CDK5R2|HAP1|UNC119|VAMP3|STXBP5L|PREPL|PDCD6IP|PREB|CPLX2|SNF8|RAB3GAP1|EXPH5|DLL1|PACSIN1|EHD2|CALY|ANKFY1|VPS11|SYT13|NDRG4|PKDCC|ANKRD13B|SCAMP5|CNIH2|SNX33|CPLX3	-2.39271	0	9	0	0	-7.95771	2.44613
1	-4.43784	GO:0099003	M1	1	0	GO Biological Processes	19	vesicle-mediated transport in synapse	-4.43784	2.38497	4.71786	24155	208	1266	26	2.05371	0.398609	1056|1138|1141|1759|3800|4983|5873|5874|6616|6855|6860|8301|8867|9515|9581|9900|10228|10814|22930|29993|50632|80128|80208|115548|254263|594855	CEL|CHRNA5|CHRNB2|DNM1|KIF5C|OPHN1|RAB27A|RAB27B|SNAP25|SYP|SYT4|PICALM|SYNJ1|STXBP5L|PREPL|SV2A|STX6|CPLX2|RAB3GAP1|PACSIN1|CALY|TRIM46|SPG11|FCHO2|CNIH2|CPLX3	-2.38649	0	9	0	0	-7.95771	2.44613
1	-4.43007	GO:0043632	M1	1	0	GO Biological Processes	19	modification-dependent macromolecule catabolic process	-4.43007	1.7291	4.39648	24155	640	1266	58	4.58136	0.58762	329|891|899|983|991|997|3077|4085|5347|5688|5691|5692|5694|5704|5719|5886|6449|6790|6921|7337|8065|8945|9101|9212|9232|9354|9655|9683|9695|10277|11047|11065|11267|22933|23304|23640|25820|26046|26224|26271|27252|27338|28952|29761|51433|51434|51449|51529|51684|55743|55872|57646|80196|144165|153769|197131|440730|493829	BIRC2|CCNB1|CCNF|CDK1|CDC20|CDC34|HFE|MAD2L1|PLK1|PSMA7|PSMB3|PSMB4|PSMB6|PSMC4|PSMD13|RAD23A|SGTA|AURKA|ELOC|UBE3A|CUL5|BTRC|USP8|AURKB|PTTG1|UBE4A|SOCS5|N4BP1|EDEM1|UBE4B|ADRM1|UBE2C|SNF8|SIRT2|UBR2|HSPBP1|ARIH1|LTN1|FBXL3|FBXO5|KLHL20|UBE2S|CCDC22|USP25|ANAPC5|ANAPC7|PCYOX1|ANAPC11|SUFU|CHFR|PBK|USP28|RNF34|PRICKLE1|SH3RF2|UBR1|TRIM67|TRIM72	-2.38178	0	14	0	0	-6.44798	2.55948
1	-4.37748	GO:2001252	M1	1	0	GO Biological Processes	19	positive regulation of chromosome organization	-4.37748	2.52204	4.73876	24155	174	1266	23	1.81675	0.375361	546|891|1663|2237|4297|4751|9212|9555|9646|9700|10856|11284|25942|26147|51433|51529|54737|55011|79035|81620|93624|140609|221477	ATRX|CCNB1|DDX11|FEN1|KMT2A|NEK2|AURKB|MACROH2A1|CTR9|ESPL1|RUVBL2|PNKP|SIN3A|PHF19|ANAPC5|ANAPC11|MPHOSPH8|PIH1D1|NABP2|CDT1|TADA2B|NEK7|C6orf89	-2.33224	0	17	0	0	-5.64786	2.52204
1	-4.3611	GO:1903829	M1	1	0	GO Biological Processes	19	positive regulation of cellular protein localization	-4.3611	2.06109	4.52221	24155	324	1266	35	2.76461	0.4608	288|324|596|983|1432|1869|1956|1969|2040|3002|3265|3843|4946|5170|5347|5581|5780|5962|6934|7429|9141|9695|10204|10403|10445|22841|23171|51512|55135|55823|59286|81620|81926|257364|340146	ANK3|APC|BCL2|CDK1|MAPK14|E2F1|EGFR|EPHA2|STOM|GZMB|HRAS|IPO5|OAZ1|PDPK1|PLK1|PRKCE|PTPN9|RDX|TCF7L2|VIL1|PDCD5|EDEM1|NUTF2|NDC80|MCRS1|RAB11FIP2|GPD1L|GTSE1|WRAP53|VPS11|UBL5|CDT1|ABHD17A|SNX33|SLC35D3	-2.32189	0	16	0	0	-5.74654	2.18948
1	-4.3611	GO:1903311	M1	1	0	GO Biological Processes	19	regulation of mRNA metabolic process	-4.3611	2.06109	4.52221	24155	324	1266	35	2.76461	0.4608	891|1432|1869|3167|3191|5688|5691|5692|5694|5704|5719|6041|6427|6651|8106|8683|9646|9698|9967|10150|10179|10659|10768|10929|11189|23210|23543|26528|54512|55544|79171|84530|135295|283375|342977	CCNB1|MAPK14|E2F1|HMX2|HNRNPL|PSMA7|PSMB3|PSMB4|PSMB6|PSMC4|PSMD13|RNASEL|SRSF2|SON|PABPN1|SRSF9|CTR9|PUM1|THRAP3|MBNL2|RBM7|CELF2|AHCYL1|SRSF8|CELF3|JMJD6|RBFOX2|DAZAP1|EXOSC4|RBM38|RBM42|SRRM4|SRSF12|SLC39A5|NANOS3	-2.32189	0	18	0	0	-5.57898	3.52242
1	-4.34385	GO:0006271	M1	1	0	GO Biological Processes	19	DNA strand elongation involved in DNA replication	-4.34385	6.67792	5.97419	24155	20	1266	7	0.552923	0.208407	2237|4176|5111|5984|9837|10535|51659	FEN1|MCM7|PCNA|RFC4|GINS1|RNASEH2A|GINS2	-2.30763	0	3	0	0	-13.2963	6.67792
1	-4.25946	GO:0051310	M1	1	0	GO Biological Processes	19	metaphase plate congression	-4.25946	3.81596	5.13613	24155	60	1266	12	0.947867	0.272326	891|3833|9183|10015|10403|10615|11004|55143|55165|81620|83540|84722	CCNB1|KIFC1|ZW10|PDCD6IP|NDC80|SPAG5|KIF2C|CDCA8|CEP55|CDT1|NUF2|PSRC1	-2.22915	0	20	0	0	-5.47165	7.94991
1	-4.26206	GO:0098662	M1	1	0	GO Biological Processes	19	inorganic cation transmembrane transport	-4.26206	1.64918	4.25342	24155	752	1266	65	5.13428	0.620265	288|475|476|489|495|514|518|534|538|581|623|773|1337|1535|1537|1729|2040|2859|2905|3077|3746|3757|5170|5581|6328|6616|6833|7226|7351|7402|7779|8065|9001|9296|9312|9990|10063|10105|11182|23171|23416|26504|29985|29988|51083|51305|54106|55240|55486|55584|56660|56901|57185|57282|57817|65125|79026|81033|126306|131096|155066|161253|254428|255022|283375	ANK3|ATOX1|ATP1A1|ATP2A3|ATP4A|ATP5F1E|ATP5MC3|ATP6V1G2|ATP7A|BAX|BDKRB1|CACNA1A|COX6A1|CYBA|CYC1|DIAPH1|STOM|GPR35|GRIN2C|HFE|KCNC1|KCNH2|PDPK1|PRKCE|SCN3A|SNAP25|ABCC8|TRPM2|UCP2|UTRN|SLC30A1|CUL5|HAP1|ATP6V1F|KCNB2|SLC12A6|COX17|PPIF|SLC2A6|GPD1L|KCNH3|CNNM4|SLC39A3|SLC2A8|GAL|KCNK9|TLR9|STEAP3|PARL|CHRNA9|KCNK12|NDUFA4L2|NIPAL3|SLC4A10|HAMP|WNK1|AHNAK|KCNH6|JSRP1|KCNH8|ATP6V0E2|REM2|SLC41A1|C…	-2.22915	0	36	1	1	-4.26206	2.10697
1	-4.18534	GO:0033260	M1	1	0	GO Biological Processes	19	nuclear DNA replication	-4.18534	3.7534	5.06381	24155	61	1266	12	0.947867	0.272326	546|2237|4176|5111|5427|5888|5982|5984|8318|9837|80174|81620	ATRX|FEN1|MCM7|PCNA|POLE2|RAD51|RFC2|RFC4|CDC45|GINS1|DBF4B|CDT1	-2.16374	0	3	0	0	-13.2963	6.67792
1	-4.18783	GO:0071459	M1	1	0	GO Biological Processes	19	protein localization to chromosome, centromeric region	-4.18783	6.35993	5.77899	24155	21	1266	7	0.552923	0.208407	983|1058|9183|9212|10403|81620|83903	CDK1|CENPA|ZW10|AURKB|NDC80|CDT1|HASPIN	-2.16374	0	6	0	0	-10.0764	6.73404
1	-4.18783	GO:0051383	M1	1	0	GO Biological Processes	19	kinetochore organization	-4.18783	6.35993	5.77899	24155	21	1266	7	0.552923	0.208407	1058|10403|55839|64946|81620|83540|387103	CENPA|NDC80|CENPN|CENPH|CDT1|NUF2|CENPW	-2.16374	0	7	0	0	-9.46648	6.35993
1	-4.13612	GO:0034080	M1	1	0	GO Biological Processes	19	CENP-A containing nucleosome assembly	-4.13612	4.33631	5.20935	24155	44	1266	10	0.789889	0.248796	1058|8363|11339|55355|55839|64946|79019|79682|387103|401541	CENPA|H4C11|OIP5|HJURP|CENPN|CENPH|CENPM|CENPU|CENPW|CENPP	-2.12461	0	7	0	0	-9.46648	6.35993
1	-4.13612	GO:0061641	M1	1	0	GO Biological Processes	19	CENP-A containing chromatin organization	-4.13612	4.33631	5.20935	24155	44	1266	10	0.789889	0.248796	1058|8363|11339|55355|55839|64946|79019|79682|387103|401541	CENPA|H4C11|OIP5|HJURP|CENPN|CENPH|CENPM|CENPU|CENPW|CENPP	-2.12461	0	7	0	0	-9.46648	6.35993
1	-4.13625	GO:0048667	M1	1	0	GO Biological Processes	19	cell morphogenesis involved in neuron differentiation	-4.13625	1.73453	4.22222	24155	583	1266	53	4.18641	0.562883	288|596|816|1136|1141|1501|1969|2046|2050|2115|2664|2803|3398|3475|3730|3800|3913|3925|4009|4628|4851|4983|5797|5979|6474|7337|8301|9048|9355|9378|9637|10048|10381|10512|22941|23077|23542|23543|25806|25942|50674|51188|56896|57498|59277|80128|80208|84446|84612|84628|115703|347733|375790	ANK3|BCL2|CAMK2B|CHRNA3|CHRNB2|CTNND2|EPHA2|EPHA8|EPHB4|ETV1|GDI1|GOLGA4|ID2|IFRD1|ANOS1|KIF5C|LAMB2|STMN1|LMX1A|MYH10|NOTCH1|OPHN1|PTPRM|RET|SHOX2|UBE3A|PICALM|ARTN|LHX2|NRXN1|FEZ2|RANBP9|TUBB3|SEMA3C|SHANK2|MYCBP2|MAPK8IP2|RBFOX2|VAX2|SIN3A|NEUROG3|SS18L2|DPYSL5|KIDINS220|NTN4|TRIM46|SPG11|BRSK1|PARD6B|NTNG2|ARHGAP33|TUBB2B|AGRN	-2.12461	0	19	0	0	-5.53981	1.81575
1	-4.13485	GO:0031023	M1	1	0	GO Biological Processes	19	microtubule organizing center organization	-4.13485	2.70534	4.6555	24155	134	1266	19	1.50079	0.341711	899|983|4751|5347|5902|6790|8409|9648|9768|10015|23354|25886|55559|84446|84612|93323|115106|253012|284403	CCNF|CDK1|NEK2|PLK1|RANBP1|AURKA|UXT|GCC2|PCLAF|PDCD6IP|HAUS5|POC1A|HAUS7|BRSK1|PARD6B|HAUS8|HAUS1|HEPACAM2|WDR62	-2.12461	0	37	1	1	-4.13485	2.74749
1	-4.11388	GO:0140056	M1	1	0	GO Biological Processes	19	organelle localization by membrane tethering	-4.11388	2.48376	4.55224	24155	169	1266	22	1.73776	0.367258	858|983|4751|5347|5865|6616|7283|8615|8636|8655|9341|9702|10228|10814|23354|55559|55823|57488|65009|84902|93323|115106	CAV2|CDK1|NEK2|PLK1|RAB3B|SNAP25|TUBG1|USO1|SSNA1|DYNLL1|VAMP3|CEP57|STX6|CPLX2|HAUS5|HAUS7|VPS11|ESYT2|NDRG4|CEP89|HAUS8|HAUS1	-2.10643	0	38	1	1	-4.11388	2.68309
1	-4.10524	GO:2001251	M1	1	0	GO Biological Processes	19	negative regulation of chromosome organization	-4.10524	2.61367	4.5994	24155	146	1266	20	1.57978	0.350448	324|546|891|991|4085|5347|6497|8971|9183|9212|9232|9319|9555|9700|10403|25942|26271|55011|80119|81620	APC|ATRX|CCNB1|CDC20|MAD2L1|PLK1|SKI|H1-10|ZW10|AURKB|PTTG1|TRIP13|MACROH2A1|ESPL1|NDC80|SIN3A|FBXO5|PIH1D1|PIF1|CDT1	-2.10056	0	6	0	0	-10.0764	6.73404
1	-4.09486	GO:0016570	M1	1	0	GO Biological Processes	19	histone modification	-4.09486	1.837	4.24842	24155	457	1266	44	3.47551	0.514768	546|890|891|983|2091|2146|3276|4297|5585|5926|6314|6497|6790|6839|7443|7799|8819|9212|9555|9646|10445|10856|22933|23186|23210|23304|23338|25942|26122|26147|27154|28989|51412|51742|53615|55011|55352|55870|56943|83903|90826|93624|221477|345630	ATRX|CCNA2|CCNB1|CDK1|FBL|EZH2|PRMT1|KMT2A|PKN1|ARID4A|ATXN7|SKI|AURKA|SUV39H1|VRK1|PRDM2|SAP30|AURKB|MACROH2A1|CTR9|MCRS1|RUVBL2|SIRT2|RCOR1|JMJD6|UBR2|JADE2|SIN3A|EPC2|PHF19|BRPF3|NTMT1|ACTL6B|ARID4B|MBD3|PIH1D1|COPRS|ASH1L|ENY2|HASPIN|PRMT9|TADA2B|C6orf89|FBLL1	-2.09294	0	39	1	1	-4.09486	5.96243
1	-4.07828	GO:0044786	M1	1	0	GO Biological Processes	19	cell cycle DNA replication	-4.07828	3.44496	4.88631	24155	72	1266	13	1.02686	0.283333	546|2237|4176|5111|5427|5888|5982|5984|8318|9837|26271|80174|81620	ATRX|FEN1|MCM7|PCNA|POLE2|RAD51|RFC2|RFC4|CDC45|GINS1|FBXO5|DBF4B|CDT1	-2.0791	0	3	0	0	-13.2963	6.67792
1	-4.06359	GO:0043687	M1	1	0	GO Biological Processes	19	post-translational protein modification	-4.06359	1.95014	4.28368	24155	362	1266	37	2.92259	0.473398	334|718|899|1114|2822|2873|3913|4008|5611|5624|5688|5691|5692|5694|5704|5719|6921|7425|7857|8065|8945|9040|9655|10491|23682|26224|27252|28952|29106|54972|55827|64708|79075|84078|122769|140739|157570	APLP2|C3|CCNF|CHGB|GPLD1|GPS1|LAMB2|LMO7|DNAJC3|PROC|PSMA7|PSMB3|PSMB4|PSMB6|PSMC4|PSMD13|ELOC|VGF|SCG2|CUL5|BTRC|UBE2M|SOCS5|CRTAP|RAB38|FBXL3|KLHL20|CCDC22|SCG3|TMEM132A|DCAF6|COPS7B|DSCC1|KBTBD7|LRR1|UBE2F|ESCO2	-2.06713	0	40	1	1	-4.06359	1.95014
1	-4.04803	GO:0048511	M1	1	0	GO Biological Processes	19	rhythmic process	-4.04803	2.06268	4.32633	24155	296	1266	32	2.52765	0.441146	196|558|983|1019|1141|1408|1644|1956|2146|2776|3398|4297|4704|4862|5111|5241|5608|6839|6928|7008|7166|7298|7337|8863|8914|8945|9967|23077|25942|26224|121278|220202	AHR|AXL|CDK1|CDK4|CHRNB2|CRY2|DDC|EGFR|EZH2|GNAQ|ID2|KMT2A|NDUFA9|NPAS2|PCNA|PGR|MAP2K6|SUV39H1|HNF1B|TEF|TPH1|TYMS|UBE3A|PER3|TIMELESS|BTRC|THRAP3|MYCBP2|SIN3A|FBXL3|TPH2|ATOH7	-2.05666	0	26	0	0	-4.88157	4.23995
1	-4.04772	GO:0015672	M1	1	0	GO Biological Processes	19	monovalent inorganic cation transport	-4.04772	1.76398	4.18246	24155	530	1266	49	3.87046	0.542117	288|476|489|495|514|518|534|538|1337|1537|2040|3060|3746|3757|4704|5581|6328|6584|6616|6833|7226|7351|7402|9296|9312|9990|10063|10105|10768|11182|23171|23412|23416|26504|29988|51083|51305|56660|56901|57282|65125|79570|81033|84068|131096|146167|154215|155066|254428	ANK3|ATP1A1|ATP2A3|ATP4A|ATP5F1E|ATP5MC3|ATP6V1G2|ATP7A|COX6A1|CYC1|STOM|HCRT|KCNC1|KCNH2|NDUFA9|PRKCE|SCN3A|SLC22A5|SNAP25|ABCC8|TRPM2|UCP2|UTRN|ATP6V1F|KCNB2|SLC12A6|COX17|PPIF|AHCYL1|SLC2A6|GPD1L|COMMD3|KCNH3|CNNM4|SLC2A8|GAL|KCNK9|KCNK12|NDUFA4L2|SLC4A10|WNK1|NKAIN1|KCNH6|SLC10A7|KCNH8|SLC38A8|NKAIN2|ATP6V0E2|SLC41A1	-2.05666	0	36	0	0	-4.26206	2.10697
1	-4.03759	GO:0007098	M1	1	0	GO Biological Processes	19	centrosome cycle	-4.03759	2.74749	4.6067	24155	125	1266	18	1.4218	0.332731	899|983|4751|5347|5902|6790|8409|9768|10015|23354|25886|55559|84446|84612|93323|115106|253012|284403	CCNF|CDK1|NEK2|PLK1|RANBP1|AURKA|UXT|PCLAF|PDCD6IP|HAUS5|POC1A|HAUS7|BRSK1|PARD6B|HAUS8|HAUS1|HEPACAM2|WDR62	-2.0492	0	37	0	0	-4.13485	2.74749
1	-4.02771	GO:0007005	M1	1	0	GO Biological Processes	19	mitochondrion organization	-4.02771	1.76066	4.16829	24155	531	1266	49	3.87046	0.542117	514|518|538|581|596|638|858|1869|2189|3002|3028|4696|4702|4704|4708|4713|4715|4899|8834|9001|9141|10063|10087|10105|10452|10456|10962|23682|26355|26519|29078|54968|55187|55486|55823|57600|59286|79133|79135|80119|84902|92609|113115|125988|126328|154791|203245|401505|728489	ATP5F1E|ATP5MC3|ATP7A|BAX|BCL2|BIK|CAV2|E2F1|FANCG|GZMB|HSD17B10|NDUFA3|NDUFA8|NDUFA9|NDUFB2|NDUFB7|NDUFB9|NRF1|TMEM11|HAP1|PDCD5|COX17|CERT1|PPIF|TOMM40|HAX1|MLLT11|RAB38|FAM162A|TIMM10|NDUFAF4|TMEM70|VPS13D|PARL|VPS11|FNIP2|UBL5|NDUFAF5|APOO|PIF1|CEP89|TIMM50|MTFR2|MICOS13|NDUFA11|FMC1|NAIF1|TOMM5|DNLZ	-2.04198	0	41	1	1	-4.02771	1.76066
1	-4.0216	GO:0006270	M1	1	0	GO Biological Processes	19	DNA replication initiation	-4.0216	4.64103	5.21257	24155	37	1266	9	0.7109	0.236123	997|4176|5427|8318|9134|23594|57418|81620|222229	CDC34|MCM7|POLE2|CDC45|CCNE2|ORC6|WDR18|CDT1|LRWD1	-2.0385	0	42	1	1	-4.0216	4.64103
1	-4.01421	GO:0031100	M1	1	0	GO Biological Processes	19	animal organ regeneration	-4.01421	3.39777	4.82526	24155	73	1266	13	1.02686	0.283333	558|890|983|1019|1956|2146|3077|4851|5111|6790|7298|10076|57817	AXL|CCNA2|CDK1|CDK4|EGFR|EZH2|HFE|NOTCH1|PCNA|AURKA|TYMS|PTPRU|HAMP	-2.03374	0	43	1	1	-4.01421	4.45195
1	-3.98262	GO:0030397	M1	1	0	GO Biological Processes	19	membrane disassembly	-3.98262	7.15492	5.79189	24155	16	1266	6	0.473934	0.193024	891|983|5347|7443|9133|91754	CCNB1|CDK1|PLK1|VRK1|CCNB2|NEK9	-2.00736	0	27	0	0	-4.84158	9.53989
1	-3.98262	GO:0051081	M1	1	0	GO Biological Processes	19	nuclear envelope disassembly	-3.98262	7.15492	5.79189	24155	16	1266	6	0.473934	0.193024	891|983|5347|7443|9133|91754	CCNB1|CDK1|PLK1|VRK1|CCNB2|NEK9	-2.00736	0	27	0	0	-4.84158	9.53989
1	-3.96765	GO:0016569	M1	1	0	GO Biological Processes	19	covalent chromatin modification	-3.96765	1.79998	4.15015	24155	477	1266	45	3.5545	0.520372	546|890|891|983|2091|2146|3276|4297|5585|5926|6314|6497|6790|6839|7443|7799|8819|9212|9555|9646|10445|10856|22933|23186|23210|23304|23338|25942|26122|26147|27154|28989|51412|51742|53615|54737|55011|55352|55870|56943|83903|90826|93624|221477|345630	ATRX|CCNA2|CCNB1|CDK1|FBL|EZH2|PRMT1|KMT2A|PKN1|ARID4A|ATXN7|SKI|AURKA|SUV39H1|VRK1|PRDM2|SAP30|AURKB|MACROH2A1|CTR9|MCRS1|RUVBL2|SIRT2|RCOR1|JMJD6|UBR2|JADE2|SIN3A|EPC2|PHF19|BRPF3|NTMT1|ACTL6B|ARID4B|MBD3|MPHOSPH8|PIH1D1|COPRS|ASH1L|ENY2|HASPIN|PRMT9|TADA2B|C6orf89|FBLL1	-1.99496	0	39	0	0	-4.09486	5.96243
1	-3.93326	GO:0042176	M1	1	0	GO Biological Processes	19	regulation of protein catabolic process	-3.93326	1.90297	4.17814	24155	381	1266	38	3.00158	0.479557	324|1956|2822|2905|3077|4085|4946|4983|5300|5347|5704|5886|5962|6449|6790|7110|7337|8945|9101|9655|9683|9695|11267|22933|23077|23640|25820|28952|29761|51684|55743|55823|55872|57449|144165|153769|257364|440730	APC|EGFR|GPLD1|GRIN2C|HFE|MAD2L1|OAZ1|OPHN1|PIN1|PLK1|PSMC4|RAD23A|RDX|SGTA|AURKA|TMF1|UBE3A|BTRC|USP8|SOCS5|N4BP1|EDEM1|SNF8|SIRT2|MYCBP2|HSPBP1|ARIH1|CCDC22|USP25|SUFU|CHFR|VPS11|PBK|PLEKHG5|PRICKLE1|SH3RF2|SNX33|TRIM67	-1.96313	0	14	0	0	-6.44798	2.55948
1	-3.92738	GO:0010639	M1	1	0	GO Biological Processes	19	negative regulation of organelle organization	-3.92738	1.88383	4.16524	24155	395	1266	39	3.08057	0.485628	118|324|546|891|899|991|2059|3925|4070|4085|4751|5216|5347|5962|6497|6860|7429|8971|9183|9212|9232|9319|9555|9637|9700|10105|10395|10403|25942|26271|29766|51256|55011|57600|79929|80119|81620|286151|348110	ADD1|APC|ATRX|CCNB1|CCNF|CDC20|EPS8|STMN1|TACSTD2|MAD2L1|NEK2|PFN1|PLK1|RDX|SKI|SYT4|VIL1|H1-10|ZW10|AURKB|PTTG1|TRIP13|MACROH2A1|FEZ2|ESPL1|PPIF|DLC1|NDC80|SIN3A|FBXO5|TMOD3|TBC1D7|PIH1D1|FNIP2|MAP6D1|PIF1|CDT1|FBXO43|ARPIN	-1.9598	0	6	0	0	-10.0764	6.73404
1	-3.92475	GO:0016572	M1	1	0	GO Biological Processes	19	histone phosphorylation	-3.92475	4.51889	5.10545	24155	38	1266	9	0.7109	0.236123	890|891|983|5585|6790|7443|9212|9555|83903	CCNA2|CCNB1|CDK1|PKN1|AURKA|VRK1|AURKB|MACROH2A1|HASPIN	-1.9597	0	44	1	1	-3.92475	8.17705
1	-3.9053	GO:0000381	M1	1	0	GO Biological Processes	19	regulation of alternative mRNA splicing, via spliceosome	-3.9053	3.52242	4.7891	24155	65	1266	12	0.947867	0.272326	3191|6427|8683|9967|10150|10179|10659|10929|11189|23543|84530|135295	HNRNPL|SRSF2|SRSF9|THRAP3|MBNL2|RBM7|CELF2|SRSF8|CELF3|RBFOX2|SRRM4|SRSF12	-1.94527	0	18	0	0	-5.57898	3.52242
1	-3.9053	GO:0006893	M1	1	0	GO Biological Processes	19	Golgi to plasma membrane transport	-3.9053	3.52242	4.7891	24155	65	1266	12	0.947867	0.272326	288|373|381|582|2803|8548|9341|9581|9648|28952|91461|149371	ANK3|TRIM23|ARF5|BBS1|GOLGA4|BLZF1|VAMP3|PREPL|GCC2|CCDC22|PKDCC|EXOC8	-1.94527	0	45	1	1	-3.9053	3.72288
1	-3.90219	GO:0001505	M1	1	0	GO Biological Processes	19	regulation of neurotransmitter levels	-3.90219	1.93485	4.17317	24155	355	1266	36	2.8436	0.467147	538|1136|1138|1141|1644|1806|2643|2717|2914|3060|5053|5865|6472|6570|6616|6855|6860|7097|7166|7779|7915|8867|9378|9515|9581|9900|10814|11255|22930|23576|51248|64130|84446|121278|132949|594855	ATP7A|CHRNA3|CHRNA5|CHRNB2|DDC|DPYD|GCH1|GLA|GRM4|HCRT|PAH|RAB3B|SHMT2|SLC18A1|SNAP25|SYP|SYT4|TLR2|TPH1|SLC30A1|ALDH5A1|SYNJ1|NRXN1|STXBP5L|PREPL|SV2A|CPLX2|HRH3|RAB3GAP1|DDAH1|PDZD11|LIN7B|BRSK1|TPH2|AASDH|CPLX3	-1.94465	0	9	0	0	-7.95771	2.44613
1	-3.89935	GO:0006892	M1	1	0	GO Biological Processes	19	post-Golgi vesicle-mediated transport	-3.89935	2.87997	4.56197	24155	106	1266	16	1.26382	0.313953	288|373|381|582|2803|4430|8548|9341|9581|9648|27252|28952|51479|64145|91461|149371	ANK3|TRIM23|ARF5|BBS1|GOLGA4|MYO1B|BLZF1|VAMP3|PREPL|GCC2|KLHL20|CCDC22|ANKFY1|RBSN|PKDCC|EXOC8	-1.94428	0	45	0	0	-3.9053	3.72288
1	-3.8925	GO:0009416	M1	1	0	GO Biological Processes	19	response to light stimulus	-3.8925	1.99883	4.19656	24155	315	1266	33	2.60664	0.447804	440|581|596|602|993|1032|1141|1408|1956|2074|2237|2776|2779|3398|3746|5111|5934|6785|8863|9094|9212|9683|9768|10277|10856|26224|51426|55872|57282|57646|65009|84446|85461	ASNS|BAX|BCL2|BCL3|CDC25A|CDKN2D|CHRNB2|CRY2|EGFR|ERCC6|FEN1|GNAQ|GNAT1|ID2|KCNC1|PCNA|RBL2|ELOVL4|PER3|UNC119|AURKB|N4BP1|PCLAF|UBE4B|RUVBL2|FBXL3|POLK|PBK|SLC4A10|USP28|NDRG4|BRSK1|TANC1	-1.9399	0	33	0	0	-4.59331	2.55293
1	-3.87955	GO:0007163	M1	1	0	GO Biological Processes	19	establishment or maintenance of cell polarity	-3.87955	2.24997	4.2991	24155	212	1266	25	1.97472	0.391026	399|1058|1495|4085|4983|5347|7477|9183|9265|9355|10015|10253|10403|11004|22841|23150|51248|51421|55914|64130|64398|84446|84612|89958|154796	RHOH|CENPA|CTNNA1|MAD2L1|OPHN1|PLK1|WNT7B|ZW10|CYTH3|LHX2|PDCD6IP|SPRY2|NDC80|KIF2C|RAB11FIP2|FRMD4B|PDZD11|AMOTL2|ERBIN|LIN7B|MPP5|BRSK1|PARD6B|SAPCD2|AMOT	-1.9294	0	6	0	0	-10.0764	6.73404
1	-3.86022	GO:0030902	M1	1	0	GO Biological Processes	19	hindbrain development	-3.86022	2.5105	4.39346	24155	152	1266	20	1.57978	0.350448	372|429|538|596|2146|3746|4009|4628|4760|4983|6928|8941|9001|10395|23543|28514|50674|51286|124925|256297	ARCN1|ASCL1|ATP7A|BCL2|EZH2|KCNC1|LMX1A|MYH10|NEUROD1|OPHN1|HNF1B|CDK5R2|HAP1|DLC1|RBFOX2|DLL1|NEUROG3|CEND1|SEZ6|PTF1A	-1.91249	0	46	1	1	-3.86022	9.53989
1	-3.8427	GO:0042427	M1	1	0	GO Biological Processes	19	serotonin biosynthetic process	-3.8427	19.0798	7.36504	24155	3	1266	3	0.236967	0.136651	1644|7166|121278	DDC|TPH1|TPH2	-1.90457	0	47	1	1	-3.8427	19.0798
1	-3.8427	GO:0008315	M1	1	0	GO Biological Processes	19	G2/MI transition of meiotic cell cycle	-3.8427	19.0798	7.36504	24155	3	1266	3	0.236967	0.136651	993|994|995	CDC25A|CDC25B|CDC25C	-1.90457	0	48	1	1	-3.8427	19.0798
1	-3.8427	GO:0110030	M1	1	0	GO Biological Processes	19	regulation of G2/MI transition of meiotic cell cycle	-3.8427	19.0798	7.36504	24155	3	1266	3	0.236967	0.136651	993|994|995	CDC25A|CDC25B|CDC25C	-1.90457	0	48	0	0	-3.8427	19.0798
1	-3.8427	GO:0110032	M1	1	0	GO Biological Processes	19	positive regulation of G2/MI transition of meiotic cell cycle	-3.8427	19.0798	7.36504	24155	3	1266	3	0.236967	0.136651	993|994|995	CDC25A|CDC25B|CDC25C	-1.90457	0	48	0	0	-3.8427	19.0798
1	-3.83211	GO:0006397	M1	1	0	GO Biological Processes	19	mRNA processing	-3.83211	1.72811	4.0282	24155	541	1266	49	3.87046	0.542117	891|1479|3167|3191|5437|5439|5440|6041|6427|6628|6632|6636|6637|6651|8106|8683|8896|9646|9967|10150|10179|10189|10212|10465|10659|10768|10907|10929|11189|23210|23543|26121|26528|27257|55110|55544|59286|64062|79005|79171|79622|79760|83443|84271|84530|90826|135295|143884|283375	CCNB1|CSTF3|HMX2|HNRNPL|POLR2H|POLR2J|POLR2K|RNASEL|SRSF2|SNRPB|SNRPD1|SNRPF|SNRPG|SON|PABPN1|SRSF9|BUD31|CTR9|THRAP3|MBNL2|RBM7|ALYREF|DDX39A|PPIH|CELF2|AHCYL1|TXNL4A|SRSF8|CELF3|JMJD6|RBFOX2|PRPF31|DAZAP1|LSM1|MAGOHB|RBM38|UBL5|RBM26|SCNM1|RBM42|SNRNP25|GEMIN7|SF3B5|POLDIP3|SRRM4|PRMT9|SRSF12|CWF19L2|SLC39A5	-1.89635	0	18	0	0	-5.57898	3.52242
1	-3.82941	GO:0000380	M1	1	0	GO Biological Processes	19	alternative mRNA splicing, via spliceosome	-3.82941	3.26365	4.6483	24155	76	1266	13	1.02686	0.283333	3191|6427|8683|9967|10150|10179|10659|10929|11189|23543|79005|84530|135295	HNRNPL|SRSF2|SRSF9|THRAP3|MBNL2|RBM7|CELF2|SRSF8|CELF3|RBFOX2|SCNM1|SRRM4|SRSF12	-1.896	0	18	0	0	-5.57898	3.52242
1	-3.81324	GO:0034501	M1	1	0	GO Biological Processes	19	protein localization to kinetochore	-3.81324	6.73404	5.56202	24155	17	1266	6	0.473934	0.193024	983|9183|9212|10403|81620|83903	CDK1|ZW10|AURKB|NDC80|CDT1|HASPIN	-1.88682	0	6	0	0	-10.0764	6.73404
1	-3.81498	GO:0031497	M1	1	0	GO Biological Processes	19	chromatin assembly	-3.81498	2.42834	4.32967	24155	165	1266	21	1.65877	0.358958	546|1058|3014|3148|8345|8352|8363|8968|8971|9555|10036|11339|29855|55355|55723|55839|64946|79019|79682|387103|401541	ATRX|CENPA|H2AX|HMGB2|H2BC9|H3C3|H4C11|H3C7|H1-10|MACROH2A1|CHAF1A|OIP5|UBN1|HJURP|ASF1B|CENPN|CENPH|CENPM|CENPU|CENPW|CENPP	-1.88682	0	7	0	0	-9.46648	6.35993
1	-3.81454	GO:0007420	M1	1	0	GO Biological Processes	19	brain development	-3.81454	1.61164	3.95769	24155	734	1266	62	4.89731	0.606539	372|429|538|546|558|581|596|1141|1500|1869|1956|2146|2905|3014|3167|3398|3746|3925|4009|4628|4760|4830|4851|4983|6497|6628|6860|6887|6928|7026|7337|7477|8655|8867|8941|9001|9148|9355|10063|10395|10460|22930|22933|22941|23543|25806|25942|28514|30062|50674|51286|53615|57282|57477|65009|79633|79659|85458|124925|256297|284403|342371	ARCN1|ASCL1|ATP7A|ATRX|AXL|BAX|BCL2|CHRNB2|CTNND1|E2F1|EGFR|EZH2|GRIN2C|H2AX|HMX2|ID2|KCNC1|STMN1|LMX1A|MYH10|NEUROD1|NME1|NOTCH1|OPHN1|SKI|SNRPB|SYT4|TAL2|HNF1B|NR2F2|UBE3A|WNT7B|DYNLL1|SYNJ1|CDK5R2|HAP1|NEURL1|LHX2|COX17|DLC1|TACC3|RAB3GAP1|SIRT2|SHANK2|RBFOX2|VAX2|SIN3A|DLL1|RAX|NEUROG3|CEND1|MBD3|SLC4A10|SHROOM4|NDRG4|FAT4|DYNC2H1|DIXDC1|SEZ6|PTF1A|WDR62|ATXN1L	-1.88682	0	49	1	1	-3.81454	1.84804
1	-3.798	GO:0031055	M1	1	0	GO Biological Processes	19	chromatin remodeling at centromere	-3.798	3.97495	4.85207	24155	48	1266	10	0.789889	0.248796	1058|8363|11339|55355|55839|64946|79019|79682|387103|401541	CENPA|H4C11|OIP5|HJURP|CENPN|CENPH|CENPM|CENPU|CENPW|CENPP	-1.87389	0	7	0	0	-9.46648	6.35993
1	-3.79401	GO:0009411	M1	1	0	GO Biological Processes	19	response to UV	-3.79401	2.55293	4.36486	24155	142	1266	19	1.50079	0.341711	581|596|602|993|1032|1956|2074|2237|5111|5934|9212|9683|9768|10277|10856|51426|55872|57646|84446	BAX|BCL2|BCL3|CDC25A|CDKN2D|EGFR|ERCC6|FEN1|PCNA|RBL2|AURKB|N4BP1|PCLAF|UBE4B|RUVBL2|POLK|PBK|USP28|BRSK1	-1.87218	0	33	0	0	-4.59331	2.55293
1	-3.77997	GO:0022406	M1	1	0	GO Biological Processes	19	membrane docking	-3.77997	2.35817	4.27727	24155	178	1266	22	1.73776	0.367258	858|983|4751|5347|5865|6616|7283|8615|8636|8655|9341|9702|10228|10814|23354|55559|55823|57488|65009|84902|93323|115106	CAV2|CDK1|NEK2|PLK1|RAB3B|SNAP25|TUBG1|USO1|SSNA1|DYNLL1|VAMP3|CEP57|STX6|CPLX2|HAUS5|HAUS7|VPS11|ESYT2|NDRG4|CEP89|HAUS8|HAUS1	-1.86042	0	38	0	0	-4.11388	2.68309
1	-3.77527	GO:0048193	M1	1	0	GO Biological Processes	19	Golgi vesicle transport	-3.77527	1.88757	4.06839	24155	374	1266	37	2.92259	0.473398	288|372|373|381|582|966|2348|2803|4430|5624|8548|8615|8655|8858|9183|9265|9341|9581|9648|10113|10228|11004|11196|22872|24137|27252|28952|51479|51560|60684|64145|83394|84068|90522|91461|149371|254263	ANK3|ARCN1|TRIM23|ARF5|BBS1|CD59|FOLR1|GOLGA4|MYO1B|PROC|BLZF1|USO1|DYNLL1|PROZ|ZW10|CYTH3|VAMP3|PREPL|GCC2|PREB|STX6|KIF2C|SEC23IP|SEC31A|KIF4A|KLHL20|CCDC22|ANKFY1|RAB6B|TRAPPC11|RBSN|PITPNM3|SLC10A7|YIF1B|PKDCC|EXOC8|CNIH2	-1.85799	0	45	0	0	-3.9053	3.72288
1	-3.77158	GO:0051054	M1	1	0	GO Biological Processes	19	positive regulation of DNA metabolic process	-3.77158	2.17576	4.19509	24155	228	1266	26	2.05371	0.398609	546|581|983|1054|1663|1956|2074|3014|3265|4751|4862|5111|5888|5982|5984|8914|9212|11284|54737|55135|79035|79075|80174|81620|140609|149840	ATRX|BAX|CDK1|CEBPG|DDX11|EGFR|ERCC6|H2AX|HRAS|NEK2|NPAS2|PCNA|RAD51|RFC2|RFC4|TIMELESS|AURKB|PNKP|MPHOSPH8|WRAP53|NABP2|DSCC1|DBF4B|CDT1|NEK7|SHLD1	-1.85656	0	4	0	0	-10.2453	3.39196
1	-3.76528	GO:0007169	M1	1	0	GO Biological Processes	19	transmembrane receptor protein tyrosine kinase signaling pathway	-3.76528	1.612	3.92651	24155	722	1266	61	4.81833	0.601877	324|534|558|858|1019|1136|1175|1432|1535|1759|1956|1969|1978|1979|2046|2050|2261|2822|3092|3265|3730|3925|5170|5286|5437|5439|5440|5782|5979|6098|7429|8065|9001|9052|9148|9296|9655|9702|10253|10254|10603|11156|22933|23235|23543|26291|26509|28514|29988|51232|53834|55777|55914|64397|65009|79633|81848|155066|161742|200734|493829	APC|ATP6V1G2|AXL|CAV2|CDK4|CHRNA3|AP2S1|MAPK14|CYBA|DNM1|EGFR|EPHA2|EIF4EBP1|EIF4EBP2|EPHA8|EPHB4|FGFR3|GPLD1|HIP1|HRAS|ANOS1|STMN1|PDPK1|PIK3C2A|POLR2H|POLR2J|POLR2K|PTPN12|RET|ROS1|VIL1|CUL5|HAP1|GPRC5A|NEURL1|ATP6V1F|SOCS5|CEP57|SPRY2|STAM2|SH2B2|PTP4A3|SIRT2|SIK2|RBFOX2|FGF21|MYOF|DLL1|SLC2A8|CRIM1|FGFRL1|MBD5|ERBIN|ZNF106|NDRG4|FAT4|SPRY4|ATP6V0E2|SPRED1|SPRED2|TRIM72	-1.85251	0	50	1	1	-3.76528	2.34313
1	-3.68841	GO:0043624	M1	1	0	GO Biological Processes	19	cellular protein complex disassembly	-3.68841	2.18805	4.14405	24155	218	1266	25	1.97472	0.391026	118|324|2059|3396|3925|5962|6182|6183|7429|8867|11004|26284|28998|29766|51116|51258|51642|57026|57129|63875|79929|90480|122704|124602|146909	ADD1|APC|EPS8|MRPL58|STMN1|RDX|MRPL12|MRPS12|VIL1|SYNJ1|KIF2C|ERAL1|MRPL13|TMOD3|MRPS2|MRPL51|MRPL48|PDXP|MRPL47|MRPL17|MAP6D1|GADD45GIP1|MRPL52|KIF19|KIF18B	-1.77786	0	51	1	1	-3.68841	2.34313
1	-3.6678	GO:0031570	M1	1	0	GO Biological Processes	19	DNA integrity checkpoint	-3.6678	2.43055	4.22924	24155	157	1266	20	1.57978	0.350448	581|891|983|995|1432|1869|3014|3276|5111|5347|5934|6790|8318|8914|51347|51512|57646|81620|84446|146956	BAX|CCNB1|CDK1|CDC25C|MAPK14|E2F1|H2AX|PRMT1|PCNA|PLK1|RBL2|AURKA|CDC45|TIMELESS|TAOK3|GTSE1|USP28|CDT1|BRSK1|EME1	-1.75948	0	15	0	0	-5.96857	3.4071
1	-3.6611	GO:0022037	M1	1	0	GO Biological Processes	19	metencephalon development	-3.6611	2.75024	4.34664	24155	111	1266	16	1.26382	0.313953	372|429|538|596|2146|3746|4009|4628|4760|4983|8941|9001|28514|51286|124925|256297	ARCN1|ASCL1|ATP7A|BCL2|EZH2|KCNC1|LMX1A|MYH10|NEUROD1|OPHN1|CDK5R2|HAP1|DLL1|CEND1|SEZ6|PTF1A	-1.75499	0	46	0	0	-3.86022	9.53989
1	-3.6408	GO:0050804	M1	1	0	GO Biological Processes	19	modulation of chemical synaptic transmission	-3.6408	1.7942	3.93571	24155	436	1266	41	3.23855	0.497519	773|793|816|991|1056|1136|1138|1141|1759|1956|1979|2905|2914|3060|3265|4983|5581|5865|6616|6855|6860|7779|9001|9101|9148|9378|9515|9581|10590|10814|22930|22941|23542|57282|57449|57497|84446|84628|254263|347733|594855	CACNA1A|CALB1|CAMK2B|CDC20|CEL|CHRNA3|CHRNA5|CHRNB2|DNM1|EGFR|EIF4EBP2|GRIN2C|GRM4|HCRT|HRAS|OPHN1|PRKCE|RAB3B|SNAP25|SYP|SYT4|SLC30A1|HAP1|USP8|NEURL1|NRXN1|STXBP5L|PREPL|SCGN|CPLX2|RAB3GAP1|SHANK2|MAPK8IP2|SLC4A10|PLEKHG5|LRFN2|BRSK1|NTNG2|CNIH2|TUBB2B|CPLX3	-1.73908	0	9	0	0	-7.95771	2.44613
1	-3.64211	GO:0051988	M1	1	0	GO Biological Processes	19	regulation of attachment of spindle microtubules to kinetochore	-3.64211	7.94991	5.66333	24155	12	1266	5	0.394945	0.176276	324|891|4751|10615|22933	APC|CCNB1|NEK2|SPAG5|SIRT2	-1.73908	0	20	0	0	-5.47165	7.94991
1	-3.63714	GO:0071456	M1	1	0	GO Biological Processes	19	cellular response to hypoxia	-3.63714	2.21215	4.11912	24155	207	1266	24	1.89573	0.38328	538|596|890|891|1869|1978|4851|4985|5581|5688|5691|5692|5694|5704|5719|6839|6921|7012|10370|22933|23576|26355|84962|132864	ATP7A|BCL2|CCNA2|CCNB1|E2F1|EIF4EBP1|NOTCH1|OPRD1|PRKCE|PSMA7|PSMB3|PSMB4|PSMB6|PSMC4|PSMD13|SUV39H1|ELOC|TERC|CITED2|SIRT2|DDAH1|FAM162A|AJUBA|CPEB2	-1.73894	0	52	1	1	-3.63714	2.47789
1	-3.63632	GO:0043087	M1	1	0	GO Biological Processes	19	regulation of GTPase activity	-3.63632	1.75263	3.91285	24155	479	1266	44	3.47551	0.514768	399|858|1969|2146|2245|2664|2776|2873|3265|3843|4739|4983|5300|5902|5962|7813|8301|9515|10113|10253|10395|22841|22930|23161|23348|23365|51256|54885|55785|55789|57569|65125|79658|84962|93627|112574|115703|116984|121512|132864|143872|154796|375790|414060	RHOH|CAV2|EPHA2|EZH2|FGD1|GDI1|GNAQ|GPS1|HRAS|IPO5|NEDD9|OPHN1|PIN1|RANBP1|RDX|EVI5|PICALM|STXBP5L|PREB|SPRY2|DLC1|RAB11FIP2|RAB3GAP1|SNX13|DOCK9|ARHGEF12|TBC1D7|TBC1D8B|FGD6|DEPDC1B|ARHGAP20|WNK1|ARHGAP10|AJUBA|TBCK|SNX18|ARHGAP33|ARAP2|FGD4|CPEB2|ARHGAP42|AMOT|AGRN|TBC1D3C	-1.73894	0	53	1	1	-3.63632	1.75263
1	-3.63279	GO:0007269	M1	1	0	GO Biological Processes	19	neurotransmitter secretion	-3.63279	2.35691	4.17547	24155	170	1266	21	1.65877	0.358958	1136|1138|1141|2914|3060|6616|6855|6860|7779|8867|9378|9515|9581|9900|10814|11255|22930|51248|64130|84446|594855	CHRNA3|CHRNA5|CHRNB2|GRM4|HCRT|SNAP25|SYP|SYT4|SLC30A1|SYNJ1|NRXN1|STXBP5L|PREPL|SV2A|CPLX2|HRH3|RAB3GAP1|PDZD11|LIN7B|BRSK1|CPLX3	-1.73757	0	9	0	0	-7.95771	2.44613
1	-3.61997	GO:0099177	M1	1	0	GO Biological Processes	19	regulation of trans-synaptic signaling	-3.61997	1.79009	3.91993	24155	437	1266	41	3.23855	0.497519	773|793|816|991|1056|1136|1138|1141|1759|1956|1979|2905|2914|3060|3265|4983|5581|5865|6616|6855|6860|7779|9001|9101|9148|9378|9515|9581|10590|10814|22930|22941|23542|57282|57449|57497|84446|84628|254263|347733|594855	CACNA1A|CALB1|CAMK2B|CDC20|CEL|CHRNA3|CHRNA5|CHRNB2|DNM1|EGFR|EIF4EBP2|GRIN2C|GRM4|HCRT|HRAS|OPHN1|PRKCE|RAB3B|SNAP25|SYP|SYT4|SLC30A1|HAP1|USP8|NEURL1|NRXN1|STXBP5L|PREPL|SCGN|CPLX2|RAB3GAP1|SHANK2|MAPK8IP2|SLC4A10|PLEKHG5|LRFN2|BRSK1|NTNG2|CNIH2|TUBB2B|CPLX3	-1.72689	0	9	0	0	-7.95771	2.44613
1	-3.61488	GO:0060322	M1	1	0	GO Biological Processes	19	head development	-3.61488	1.57156	3.80864	24155	777	1266	64	5.05529	0.615732	372|429|538|546|558|581|596|1141|1500|1869|1956|2146|2905|3014|3167|3398|3746|3925|4009|4628|4760|4830|4851|4983|5083|6497|6628|6860|6887|6928|7026|7337|7477|8655|8867|8941|9001|9148|9355|10063|10395|10460|22930|22933|22941|23543|25806|25942|28514|30062|50674|51286|53615|55717|57282|57477|65009|79633|79659|85458|124925|256297|284403|342371	ARCN1|ASCL1|ATP7A|ATRX|AXL|BAX|BCL2|CHRNB2|CTNND1|E2F1|EGFR|EZH2|GRIN2C|H2AX|HMX2|ID2|KCNC1|STMN1|LMX1A|MYH10|NEUROD1|NME1|NOTCH1|OPHN1|PAX9|SKI|SNRPB|SYT4|TAL2|HNF1B|NR2F2|UBE3A|WNT7B|DYNLL1|SYNJ1|CDK5R2|HAP1|NEURL1|LHX2|COX17|DLC1|TACC3|RAB3GAP1|SIRT2|SHANK2|RBFOX2|VAX2|SIN3A|DLL1|RAX|NEUROG3|CEND1|MBD3|WDR11|SLC4A10|SHROOM4|NDRG4|FAT4|DYNC2H1|DIXDC1|SEZ6|PTF1A|WDR62|ATXN1L	-1.72393	0	49	0	0	-3.81454	1.84804
1	-3.60097	GO:1990778	M1	1	0	GO Biological Processes	19	protein localization to cell periphery	-3.60097	1.95065	3.98124	24155	313	1266	32	2.52765	0.441146	288|582|1956|1969|2803|2905|3265|5170|5347|5581|5780|5865|5962|6616|7429|8301|8548|8631|9312|9341|9581|9648|22841|25945|29993|30846|51248|64130|64398|89958|91461|115548	ANK3|BBS1|EGFR|EPHA2|GOLGA4|GRIN2C|HRAS|PDPK1|PLK1|PRKCE|PTPN9|RAB3B|RDX|SNAP25|VIL1|PICALM|BLZF1|SKAP1|KCNB2|VAMP3|PREPL|GCC2|RAB11FIP2|NECTIN3|PACSIN1|EHD2|PDZD11|LIN7B|MPP5|SAPCD2|PKDCC|FCHO2	-1.71214	0	16	0	0	-5.74654	2.18948
1	-3.59743	GO:0099643	M1	1	0	GO Biological Processes	19	signal release from synapse	-3.59743	2.34313	4.14528	24155	171	1266	21	1.65877	0.358958	1136|1138|1141|2914|3060|6616|6855|6860|7779|8867|9378|9515|9581|9900|10814|11255|22930|51248|64130|84446|594855	CHRNA3|CHRNA5|CHRNB2|GRM4|HCRT|SNAP25|SYP|SYT4|SLC30A1|SYNJ1|NRXN1|STXBP5L|PREPL|SV2A|CPLX2|HRH3|RAB3GAP1|PDZD11|LIN7B|BRSK1|CPLX3	-1.71073	0	9	0	0	-7.95771	2.44613
1	-3.59318	GO:0030900	M1	1	0	GO Biological Processes	19	forebrain development	-3.59318	1.84804	3.92921	24155	382	1266	37	2.92259	0.473398	429|538|546|558|581|1141|1869|1956|2146|3014|3398|3746|4009|4628|4760|4830|4851|4983|6497|6887|7026|7477|8941|9001|9355|10395|10460|22930|25806|25942|30062|50674|57282|79633|79659|85458|284403	ASCL1|ATP7A|ATRX|AXL|BAX|CHRNB2|E2F1|EGFR|EZH2|H2AX|ID2|KCNC1|LMX1A|MYH10|NEUROD1|NME1|NOTCH1|OPHN1|SKI|TAL2|NR2F2|WNT7B|CDK5R2|HAP1|LHX2|DLC1|TACC3|RAB3GAP1|VAX2|SIN3A|RAX|NEUROG3|SLC4A10|FAT4|DYNC2H1|DIXDC1|WDR62	-1.70858	0	49	0	0	-3.81454	1.84804
1	-3.58889	GO:0070646	M1	1	0	GO Biological Processes	19	protein modification by small protein removal	-3.58889	1.97158	3.98241	24155	300	1266	31	2.44866	0.434374	324|329|330|890|983|991|993|2873|5688|5691|5692|5694|5704|5719|5886|6314|6472|7186|9101|10254|10445|11047|29761|29844|54532|55777|56943|57646|64708|93624|159195	APC|BIRC2|BIRC3|CCNA2|CDK1|CDC20|CDC25A|GPS1|PSMA7|PSMB3|PSMB4|PSMB6|PSMC4|PSMD13|RAD23A|ATXN7|SHMT2|TRAF2|USP8|STAM2|MCRS1|ADRM1|USP25|TFPT|USP53|MBD5|ENY2|USP28|COPS7B|TADA2B|USP54	-1.70637	0	54	1	1	-3.58889	2.05159
1	-3.56198	GO:0006302	M1	1	0	GO Biological Processes	19	double-strand break repair	-3.56198	2.07723	4.01025	24155	248	1266	27	2.1327	0.406038	1663|2237|3014|4176|5531|5888|5889|7979|8318|8363|8438|8914|9319|9401|9665|9985|10635|10721|25788|51659|55010|55135|79035|146956|149840|157570|375757	DDX11|FEN1|H2AX|MCM7|PPP4C|RAD51|RAD51C|SEM1|CDC45|H4C11|RAD54L|TIMELESS|TRIP13|RECQL4|MARF1|REC8|RAD51AP1|POLQ|RAD54B|GINS2|PARPBP|WRAP53|NABP2|EME1|SHLD1|ESCO2|SWI5	-1.68155	0	4	0	0	-10.2453	3.39196
1	-3.55643	GO:0099536	M1	1	0	GO Biological Processes	19	synaptic signaling	-3.55643	1.58998	3.77981	24155	720	1266	60	4.73934	0.597171	773|793|816|991|1056|1136|1138|1141|1759|1956|1979|2905|2914|3060|3265|3838|4983|5026|5581|5865|6616|6750|6855|6860|7779|8484|8867|9001|9094|9101|9148|9378|9515|9546|9581|9900|9990|10590|10814|11255|22930|22941|23542|51248|55584|57282|57449|57497|64130|80208|80758|84446|84628|84902|91978|124925|254263|347733|353174|594855	CACNA1A|CALB1|CAMK2B|CDC20|CEL|CHRNA3|CHRNA5|CHRNB2|DNM1|EGFR|EIF4EBP2|GRIN2C|GRM4|HCRT|HRAS|KPNA2|OPHN1|P2RX5|PRKCE|RAB3B|SNAP25|SST|SYP|SYT4|SLC30A1|GALR3|SYNJ1|HAP1|UNC119|USP8|NEURL1|NRXN1|STXBP5L|APBA3|PREPL|SV2A|SLC12A6|SCGN|CPLX2|HRH3|RAB3GAP1|SHANK2|MAPK8IP2|PDZD11|CHRNA9|SLC4A10|PLEKHG5|LRFN2|LIN7B|SPG11|PRR7|BRSK1|NTNG2|CEP89|TPGS1|SEZ6|CNIH2|TUBB2B|ZACN|CPLX3	-1.67807	0	9	0	0	-7.95771	2.44613
1	-3.5527	GO:0071824	M1	1	0	GO Biological Processes	19	protein-DNA complex subunit organization	-3.5527	1.98748	3.96481	24155	288	1266	30	2.36967	0.427483	546|1058|3014|3148|4176|5704|5888|6928|8318|8345|8352|8363|8968|8971|9328|9555|10036|11339|29855|55011|55355|55723|55839|64946|79019|79682|81620|375757|387103|401541	ATRX|CENPA|H2AX|HMGB2|MCM7|PSMC4|RAD51|HNF1B|CDC45|H2BC9|H3C3|H4C11|H3C7|H1-10|GTF3C5|MACROH2A1|CHAF1A|OIP5|UBN1|PIH1D1|HJURP|ASF1B|CENPN|CENPH|CENPM|CENPU|CDT1|SWI5|CENPW|CENPP	-1.67641	0	7	0	0	-9.46648	6.35993
1	-3.55012	GO:0008380	M1	1	0	GO Biological Processes	19	RNA splicing	-3.55012	1.74932	3.85394	24155	469	1266	43	3.39652	0.509093	1479|3167|3191|5437|5439|5440|6427|6628|6632|6636|6637|6651|8106|8683|8896|9967|10150|10179|10189|10212|10465|10659|10907|10929|11189|23210|23543|26121|26528|27257|55110|55544|59286|79005|79026|79171|79622|79760|83443|84530|135295|143884|283375	CSTF3|HMX2|HNRNPL|POLR2H|POLR2J|POLR2K|SRSF2|SNRPB|SNRPD1|SNRPF|SNRPG|SON|PABPN1|SRSF9|BUD31|THRAP3|MBNL2|RBM7|ALYREF|DDX39A|PPIH|CELF2|TXNL4A|SRSF8|CELF3|JMJD6|RBFOX2|PRPF31|DAZAP1|LSM1|MAGOHB|RBM38|UBL5|SCNM1|AHNAK|RBM42|SNRNP25|GEMIN7|SF3B5|SRRM4|SRSF12|CWF19L2|SLC39A5	-1.67588	0	18	0	0	-5.57898	3.52242
1	-3.53536	GO:0001556	M1	1	0	GO Biological Processes	19	oocyte maturation	-3.53536	5.13686	4.96348	24155	26	1266	7	0.552923	0.208407	891|994|6790|9319|9985|22933|26271	CCNB1|CDC25B|AURKA|TRIP13|REC8|SIRT2|FBXO5	-1.66316	0	32	0	0	-4.68849	9.53989
1	-3.52602	GO:0014902	M1	1	0	GO Biological Processes	19	myotube differentiation	-3.52602	2.67786	4.22309	24155	114	1266	16	1.26382	0.313953	596|688|824|858|1432|1760|4851|6474|6497|26509|30846|51177|55544|85461|284358|493829	BCL2|KLF5|CAPN2|CAV2|MAPK14|DMPK|NOTCH1|SHOX2|SKI|MYOF|EHD2|PLEKHO1|RBM38|TANC1|MAMSTR|TRIM72	-1.65585	0	55	1	1	-3.52602	2.98122
1	-3.49709	GO:0006998	M1	1	0	GO Biological Processes	19	nuclear envelope organization	-3.49709	3.66919	4.53151	24155	52	1266	10	0.789889	0.248796	891|983|1760|5347|7443|9133|26092|79188|80346|91754	CCNB1|CDK1|DMPK|PLK1|VRK1|CCNB2|TOR1AIP1|TMEM43|REEP4|NEK9	-1.62895	0	27	0	0	-4.84158	9.53989
1	-3.49189	GO:0071417	M1	1	0	GO Biological Processes	19	cellular response to organonitrogen compound	-3.49189	1.65207	3.76796	24155	589	1266	51	4.02844	0.552615	115|196|324|534|538|688|773|824|837|858|890|1019|1495|1535|1644|1663|1729|1956|1978|1979|2146|2348|2822|3843|4141|5106|5170|5286|5888|6472|7226|8615|8914|9148|9296|10603|10661|10768|22933|23235|23304|25942|26291|29988|55777|57026|64397|132864|155066|197131|493829	ADCY9|AHR|APC|ATP6V1G2|ATP7A|KLF5|CACNA1A|CAPN2|CASP4|CAV2|CCNA2|CDK4|CTNNA1|CYBA|DDC|DDX11|DIAPH1|EGFR|EIF4EBP1|EIF4EBP2|EZH2|FOLR1|GPLD1|IPO5|MARS1|PCK2|PDPK1|PIK3C2A|RAD51|SHMT2|TRPM2|USO1|TIMELESS|NEURL1|ATP6V1F|SH2B2|KLF1|AHCYL1|SIRT2|SIK2|UBR2|SIN3A|FGF21|SLC2A8|MBD5|PDXP|ZNF106|CPEB2|ATP6V0E2|UBR1|TRIM72	-1.62577	0	29	0	0	-4.75763	2.00138
1	-3.48823	GO:0051293	M1	1	0	GO Biological Processes	19	establishment of spindle localization	-3.48823	3.99344	4.62047	24155	43	1266	9	0.7109	0.236123	1058|4085|5347|9183|9700|10253|10403|51203|89958	CENPA|MAD2L1|PLK1|ZW10|ESPL1|SPRY2|NDC80|NUSAP1|SAPCD2	-1.62411	0	6	0	0	-10.0764	6.73404
1	-3.45945	GO:0032200	M1	1	0	GO Biological Processes	19	telomere organization	-3.45945	2.28957	4.0266	24155	175	1266	21	1.65877	0.358958	546|2237|4751|5111|5427|5888|5889|5982|5984|7012|8352|8363|8968|9134|9212|9401|11284|55135|79035|80119|140609	ATRX|FEN1|NEK2|PCNA|POLE2|RAD51|RAD51C|RFC2|RFC4|TERC|H3C3|H4C11|H3C7|CCNE2|AURKB|RECQL4|PNKP|WRAP53|NABP2|PIF1|NEK7	-1.59733	0	56	1	1	-3.45945	5.6117
1	-3.44879	GO:0016571	M1	1	0	GO Biological Processes	19	histone methylation	-3.44879	2.47076	4.08976	24155	139	1266	18	1.4218	0.332731	546|2091|2146|3276|4297|5926|6839|7799|9555|9646|26147|28989|51742|55011|55352|55870|90826|345630	ATRX|FBL|EZH2|PRMT1|KMT2A|ARID4A|SUV39H1|PRDM2|MACROH2A1|CTR9|PHF19|NTMT1|ARID4B|PIH1D1|COPRS|ASH1L|PRMT9|FBLL1	-1.59063	0	39	0	0	-4.09486	5.96243
1	-3.4504	GO:0000212	M1	1	0	GO Biological Processes	19	meiotic spindle organization	-3.4504	7.33838	5.37602	24155	13	1266	5	0.394945	0.176276	546|6790|7283|9700|26271	ATRX|AURKA|TUBG1|ESPL1|FBXO5	-1.59063	0	57	1	1	-3.4504	7.33838
1	-3.42499	GO:0022616	M1	1	0	GO Biological Processes	19	DNA strand elongation	-3.42499	4.94661	4.82551	24155	27	1266	7	0.552923	0.208407	2237|4176|5111|5984|9837|10535|51659	FEN1|MCM7|PCNA|RFC4|GINS1|RNASEH2A|GINS2	-1.57077	0	3	0	0	-13.2963	6.67792
1	-3.42692	GO:0007131	M1	1	0	GO Biological Processes	19	reciprocal meiotic recombination	-3.42692	3.59996	4.45631	24155	53	1266	10	0.789889	0.248796	5888|5889|8438|9319|9985|23304|25788|29893|84057|146956	RAD51|RAD51C|RAD54L|TRIP13|REC8|UBR2|RAD54B|PSMC3IP|MND1|EME1	-1.57077	0	5	0	0	-10.165	3.97495
1	-3.41495	GO:0097479	M1	1	0	GO Biological Processes	19	synaptic vesicle localization	-3.41495	2.3268	4.00961	24155	164	1266	20	1.57978	0.350448	1138|1141|1759|3800|5873|6616|6855|6860|8301|8867|9515|9581|9900|10814|22930|80128|80208|84446|254263|594855	CHRNA5|CHRNB2|DNM1|KIF5C|RAB27A|SNAP25|SYP|SYT4|PICALM|SYNJ1|STXBP5L|PREPL|SV2A|CPLX2|RAB3GAP1|TRIM46|SPG11|BRSK1|CNIH2|CPLX3	-1.56423	0	9	0	0	-7.95771	2.44613
1	-3.41456	GO:0051648	M1	1	0	GO Biological Processes	19	vesicle localization	-3.41456	1.92662	3.84277	24155	307	1266	31	2.44866	0.434374	966|1138|1141|1759|2348|3800|5873|5874|6616|6855|6860|8301|8615|8867|9001|9515|9581|9900|10113|10814|11196|22872|22930|55717|79443|80128|80208|84446|91978|254263|594855	CD59|CHRNA5|CHRNB2|DNM1|FOLR1|KIF5C|RAB27A|RAB27B|SNAP25|SYP|SYT4|PICALM|USO1|SYNJ1|HAP1|STXBP5L|PREPL|SV2A|PREB|CPLX2|SEC23IP|SEC31A|RAB3GAP1|WDR11|FYCO1|TRIM46|SPG11|BRSK1|TPGS1|CNIH2|CPLX3	-1.56423	0	9	0	0	-7.95771	2.44613
1	-3.39247	GO:0048469	M1	1	0	GO Biological Processes	19	cell maturation	-3.39247	2.2637	3.96847	24155	177	1266	21	1.65877	0.358958	429|558|596|718|891|994|2046|3398|5241|5979|6790|7298|9319|9985|22933|26271|51083|54738|59277|84530|375790	ASCL1|AXL|BCL2|C3|CCNB1|CDC25B|EPHA8|ID2|PGR|RET|AURKA|TYMS|TRIP13|REC8|SIRT2|FBXO5|GAL|FEV|NTN4|SRRM4|AGRN	-1.54528	0	11	0	0	-6.94498	3.24762
1	-3.39175	GO:1903050	M1	1	0	GO Biological Processes	19	regulation of proteolysis involved in cellular protein catabolic process	-3.39175	2.12984	3.91355	24155	215	1266	24	1.89573	0.38328	3077|4983|5347|5704|5886|6449|6790|7110|7337|8945|9655|9683|9695|22933|23640|25820|28952|29761|51684|55743|55872|144165|153769|440730	HFE|OPHN1|PLK1|PSMC4|RAD23A|SGTA|AURKA|TMF1|UBE3A|BTRC|SOCS5|N4BP1|EDEM1|SIRT2|HSPBP1|ARIH1|CCDC22|USP25|SUFU|CHFR|PBK|PRICKLE1|SH3RF2|TRIM67	-1.54528	0	14	0	0	-6.44798	2.55948
1	-3.37997	GO:0043269	M1	1	0	GO Biological Processes	19	regulation of ion transport	-3.37997	1.57864	3.65643	24155	701	1266	58	4.58136	0.58762	288|476|538|581|596|623|773|816|1136|1141|1408|1535|1729|2040|2859|3060|3077|3746|3757|4985|5026|5170|5581|5608|5865|6098|6328|6860|7402|7779|9001|9312|9341|9900|10063|10105|10768|11255|22930|22941|23171|23416|23542|51083|54106|56660|57586|57817|65125|79026|79570|81033|126306|131096|154215|161253|254263|255022	ANK3|ATP1A1|ATP7A|BAX|BCL2|BDKRB1|CACNA1A|CAMK2B|CHRNA3|CHRNB2|CRY2|CYBA|DIAPH1|STOM|GPR35|HCRT|HFE|KCNC1|KCNH2|OPRD1|P2RX5|PDPK1|PRKCE|MAP2K6|RAB3B|ROS1|SCN3A|SYT4|UTRN|SLC30A1|HAP1|KCNB2|VAMP3|SV2A|COX17|PPIF|AHCYL1|HRH3|RAB3GAP1|SHANK2|GPD1L|KCNH3|MAPK8IP2|GAL|TLR9|KCNK12|SYT13|HAMP|WNK1|AHNAK|NKAIN1|KCNH6|JSRP1|KCNH8|NKAIN2|REM2|CNIH2|CALHM1	-1.53542	0	36	0	0	-4.26206	2.10697
1	-3.37326	GO:0048489	M1	1	0	GO Biological Processes	19	synaptic vesicle transport	-3.37326	2.36938	3.99618	24155	153	1266	19	1.50079	0.341711	1138|1141|1759|3800|5873|6616|6855|6860|8301|8867|9515|9581|9900|10814|22930|80128|80208|254263|594855	CHRNA5|CHRNB2|DNM1|KIF5C|RAB27A|SNAP25|SYP|SYT4|PICALM|SYNJ1|STXBP5L|PREPL|SV2A|CPLX2|RAB3GAP1|TRIM46|SPG11|CNIH2|CPLX3	-1.53441	0	9	0	0	-7.95771	2.44613
1	-3.37326	GO:0097480	M1	1	0	GO Biological Processes	19	establishment of synaptic vesicle localization	-3.37326	2.36938	3.99618	24155	153	1266	19	1.50079	0.341711	1138|1141|1759|3800|5873|6616|6855|6860|8301|8867|9515|9581|9900|10814|22930|80128|80208|254263|594855	CHRNA5|CHRNB2|DNM1|KIF5C|RAB27A|SNAP25|SYP|SYT4|PICALM|SYNJ1|STXBP5L|PREPL|SV2A|CPLX2|RAB3GAP1|TRIM46|SPG11|CNIH2|CPLX3	-1.53441	0	9	0	0	-7.95771	2.44613
1	-3.37363	GO:0045862	M1	1	0	GO Biological Processes	19	positive regulation of proteolysis	-3.37363	1.83459	3.77327	24155	364	1266	35	2.76461	0.4608	581|718|837|1432|2161|2822|3092|3336|5347|5704|5886|6449|6790|7186|8301|8945|9141|9655|9695|9705|9966|10395|11047|22933|23640|25820|26355|28952|55743|56616|80758|144165|153769|257364|440730	BAX|C3|CASP4|MAPK14|F12|GPLD1|HIP1|HSPE1|PLK1|PSMC4|RAD23A|SGTA|AURKA|TRAF2|PICALM|BTRC|PDCD5|SOCS5|EDEM1|ST18|TNFSF15|DLC1|ADRM1|SIRT2|HSPBP1|ARIH1|FAM162A|CCDC22|CHFR|DIABLO|PRR7|PRICKLE1|SH3RF2|SNX33|TRIM67	-1.53441	0	14	0	0	-6.44798	2.55948
1	-3.37053	GO:0048732	M1	1	0	GO Biological Processes	19	gland development	-3.37053	1.75446	3.73442	24155	435	1266	40	3.15956	0.491614	429|440|538|581|596|1054|1956|1969|2146|3077|3219|3239|3398|3642|3673|4830|4851|5106|5111|5241|6239|6790|6928|7068|7166|7298|7337|7392|7477|8945|9133|9148|10370|10512|55727|55870|57817|59277|65985|256297	ASCL1|ASNS|ATP7A|BAX|BCL2|CEBPG|EGFR|EPHA2|EZH2|HFE|HOXB9|HOXD13|ID2|INSM1|ITGA2|NME1|NOTCH1|PCK2|PCNA|PGR|RREB1|AURKA|HNF1B|THRB|TPH1|TYMS|UBE3A|USF2|WNT7B|BTRC|CCNB2|NEURL1|CITED2|SEMA3C|BTBD7|ASH1L|HAMP|NTN4|AACS|PTF1A	-1.53356	0	43	0	0	-4.01421	4.45195
1	-3.3586	GO:0035825	M1	1	0	GO Biological Processes	19	homologous recombination	-3.3586	3.53329	4.38291	24155	54	1266	10	0.789889	0.248796	5888|5889|8438|9319|9985|23304|25788|29893|84057|146956	RAD51|RAD51C|RAD54L|TRIP13|REC8|UBR2|RAD54B|PSMC3IP|MND1|EME1	-1.52352	0	5	0	0	-10.165	3.97495
1	-3.35313	GO:0007144	M1	1	0	GO Biological Processes	19	female meiosis I	-3.35313	9.53989	5.68151	24155	8	1266	4	0.315956	0.157728	994|6790|9319|26271	CDC25B|AURKA|TRIP13|FBXO5	-1.52176	0	32	0	0	-4.68849	9.53989
1	-3.35313	GO:0071169	M1	1	0	GO Biological Processes	19	establishment of protein localization to chromatin	-3.35313	9.53989	5.68151	24155	8	1266	4	0.315956	0.157728	9555|10856|55011|222229	MACROH2A1|RUVBL2|PIH1D1|LRWD1	-1.52176	0	58	1	1	-3.35313	9.53989
1	-3.34221	GO:0000209	M1	1	0	GO Biological Processes	19	protein polyubiquitination	-3.34221	1.90798	3.78404	24155	310	1266	31	2.44866	0.434374	329|596|899|997|4008|5688|5691|5692|5694|5704|5719|7064|7186|7337|8945|9354|10277|11065|23304|25820|26224|27252|27338|29089|51433|51434|51529|55743|80196|85363|138065	BIRC2|BCL2|CCNF|CDC34|LMO7|PSMA7|PSMB3|PSMB4|PSMB6|PSMC4|PSMD13|THOP1|TRAF2|UBE3A|BTRC|UBE4A|UBE4B|UBE2C|UBR2|ARIH1|FBXL3|KLHL20|UBE2S|UBE2T|ANAPC5|ANAPC7|ANAPC11|CHFR|RNF34|TRIM5|RNF183	-1.5127	0	14	0	0	-6.44798	2.55948
1	-3.33294	GO:0036294	M1	1	0	GO Biological Processes	19	cellular response to decreased oxygen levels	-3.33294	2.11021	3.86356	24155	217	1266	24	1.89573	0.38328	538|596|890|891|1869|1978|4851|4985|5581|5688|5691|5692|5694|5704|5719|6839|6921|7012|10370|22933|23576|26355|84962|132864	ATP7A|BCL2|CCNA2|CCNB1|E2F1|EIF4EBP1|NOTCH1|OPRD1|PRKCE|PSMA7|PSMB3|PSMB4|PSMB6|PSMC4|PSMD13|SUV39H1|ELOC|TERC|CITED2|SIRT2|DDAH1|FAM162A|AJUBA|CPEB2	-1.50527	0	52	0	0	-3.63714	2.47789
1	-3.32679	GO:0006479	M1	1	0	GO Biological Processes	19	protein methylation	-3.32679	2.23841	3.91111	24155	179	1266	21	1.65877	0.358958	546|2091|2146|3276|4297|5865|5926|6628|6839|7799|9555|9646|26147|28989|51742|55011|55352|55870|79091|90826|345630	ATRX|FBL|EZH2|PRMT1|KMT2A|RAB3B|ARID4A|SNRPB|SUV39H1|PRDM2|MACROH2A1|CTR9|PHF19|NTMT1|ARID4B|PIH1D1|COPRS|ASH1L|METTL22|PRMT9|FBLL1	-1.50279	0	39	0	0	-4.09486	5.96243
1	-3.32679	GO:0008213	M1	1	0	GO Biological Processes	19	protein alkylation	-3.32679	2.23841	3.91111	24155	179	1266	21	1.65877	0.358958	546|2091|2146|3276|4297|5865|5926|6628|6839|7799|9555|9646|26147|28989|51742|55011|55352|55870|79091|90826|345630	ATRX|FBL|EZH2|PRMT1|KMT2A|RAB3B|ARID4A|SNRPB|SUV39H1|PRDM2|MACROH2A1|CTR9|PHF19|NTMT1|ARID4B|PIH1D1|COPRS|ASH1L|METTL22|PRMT9|FBLL1	-1.50279	0	39	0	0	-4.09486	5.96243
1	-3.32001	GO:0071168	M1	1	0	GO Biological Processes	19	protein localization to chromatin	-3.32001	4.76994	4.69419	24155	28	1266	7	0.552923	0.208407	2146|5347|9555|10856|55011|157570|222229	EZH2|PLK1|MACROH2A1|RUVBL2|PIH1D1|ESCO2|LRWD1	-1.49783	0	58	0	0	-3.35313	9.53989
1	-3.31243	GO:0016579	M1	1	0	GO Biological Processes	19	protein deubiquitination	-3.31243	1.94829	3.78061	24155	284	1266	29	2.29068	0.420468	324|329|330|890|983|991|993|5688|5691|5692|5694|5704|5719|5886|6314|6472|7186|9101|10254|10445|11047|29761|29844|54532|55777|56943|57646|93624|159195	APC|BIRC2|BIRC3|CCNA2|CDK1|CDC20|CDC25A|PSMA7|PSMB3|PSMB4|PSMB6|PSMC4|PSMD13|RAD23A|ATXN7|SHMT2|TRAF2|USP8|STAM2|MCRS1|ADRM1|USP25|TFPT|USP53|MBD5|ENY2|USP28|TADA2B|USP54	-1.49207	0	54	0	0	-3.58889	2.05159
1	-3.30355	GO:0007268	M1	1	0	GO Biological Processes	19	chemical synaptic transmission	-3.30355	1.56746	3.59893	24155	706	1266	58	4.58136	0.58762	773|793|816|991|1056|1136|1138|1141|1759|1956|1979|2905|2914|3060|3265|4983|5026|5581|5865|6616|6750|6855|6860|7779|8484|8867|9001|9094|9101|9148|9378|9515|9546|9581|9900|9990|10590|10814|11255|22930|22941|23542|51248|55584|57282|57449|57497|64130|80208|84446|84628|84902|91978|124925|254263|347733|353174|594855	CACNA1A|CALB1|CAMK2B|CDC20|CEL|CHRNA3|CHRNA5|CHRNB2|DNM1|EGFR|EIF4EBP2|GRIN2C|GRM4|HCRT|HRAS|OPHN1|P2RX5|PRKCE|RAB3B|SNAP25|SST|SYP|SYT4|SLC30A1|GALR3|SYNJ1|HAP1|UNC119|USP8|NEURL1|NRXN1|STXBP5L|APBA3|PREPL|SV2A|SLC12A6|SCGN|CPLX2|HRH3|RAB3GAP1|SHANK2|MAPK8IP2|PDZD11|CHRNA9|SLC4A10|PLEKHG5|LRFN2|LIN7B|SPG11|BRSK1|NTNG2|CEP89|TPGS1|SEZ6|CNIH2|TUBB2B|ZACN|CPLX3	-1.48858	0	9	0	0	-7.95771	2.44613
1	-3.30355	GO:0098916	M1	1	0	GO Biological Processes	19	anterograde trans-synaptic signaling	-3.30355	1.56746	3.59893	24155	706	1266	58	4.58136	0.58762	773|793|816|991|1056|1136|1138|1141|1759|1956|1979|2905|2914|3060|3265|4983|5026|5581|5865|6616|6750|6855|6860|7779|8484|8867|9001|9094|9101|9148|9378|9515|9546|9581|9900|9990|10590|10814|11255|22930|22941|23542|51248|55584|57282|57449|57497|64130|80208|84446|84628|84902|91978|124925|254263|347733|353174|594855	CACNA1A|CALB1|CAMK2B|CDC20|CEL|CHRNA3|CHRNA5|CHRNB2|DNM1|EGFR|EIF4EBP2|GRIN2C|GRM4|HCRT|HRAS|OPHN1|P2RX5|PRKCE|RAB3B|SNAP25|SST|SYP|SYT4|SLC30A1|GALR3|SYNJ1|HAP1|UNC119|USP8|NEURL1|NRXN1|STXBP5L|APBA3|PREPL|SV2A|SLC12A6|SCGN|CPLX2|HRH3|RAB3GAP1|SHANK2|MAPK8IP2|PDZD11|CHRNA9|SLC4A10|PLEKHG5|LRFN2|LIN7B|SPG11|BRSK1|NTNG2|CEP89|TPGS1|SEZ6|CNIH2|TUBB2B|ZACN|CPLX3	-1.48858	0	9	0	0	-7.95771	2.44613
1	-3.3039	GO:0032886	M1	1	0	GO Biological Processes	19	regulation of microtubule-based process	-3.3039	2.10053	3.83877	24155	218	1266	24	1.89573	0.38328	324|899|1729|3925|4751|5347|5902|6790|8480|9001|10015|10460|10615|22974|25886|57606|79187|79929|80128|84722|85458|220134|221150|254263	APC|CCNF|DIAPH1|STMN1|NEK2|PLK1|RANBP1|AURKA|RAE1|HAP1|PDCD6IP|TACC3|SPAG5|TPX2|POC1A|SLAIN2|FSD1|MAP6D1|TRIM46|PSRC1|DIXDC1|SKA1|SKA3|CNIH2	-1.48858	0	59	1	1	-3.3039	3.54973
1	-3.30088	GO:1902807	M1	1	0	GO Biological Processes	19	negative regulation of cell cycle G1/S phase transition	-3.30088	2.476	3.9838	24155	131	1266	17	1.34281	0.323486	581|596|891|983|995|1019|1032|1869|2146|3276|5111|5934|6790|10217|25959|51512|56241	BAX|BCL2|CCNB1|CDK1|CDC25C|CDK4|CDKN2D|E2F1|EZH2|PRMT1|PCNA|RBL2|AURKA|CTDSPL|KANK2|GTSE1|SUSD2	-1.48769	0	15	0	0	-5.96857	3.4071
1	-3.27458	GO:0007264	M1	1	0	GO Biological Processes	19	small GTPase mediated signal transduction	-3.27458	1.63446	3.61159	24155	572	1266	49	3.87046	0.542117	399|890|1432|2059|2245|2664|2859|3265|3925|4851|4983|5865|5873|5874|5962|6239|8615|9101|9265|9828|9908|10253|10395|10603|10900|11214|22800|23348|23365|23682|25959|50618|51560|55785|55789|57449|57569|57646|79658|81848|84904|115703|116442|116984|121268|121512|143872|154796|440730	RHOH|CCNA2|MAPK14|EPS8|FGD1|GDI1|GPR35|HRAS|STMN1|NOTCH1|OPHN1|RAB3B|RAB27A|RAB27B|RDX|RREB1|USO1|USP8|CYTH3|ARHGEF17|G3BP2|SPRY2|DLC1|SH2B2|RUNDC3A|AKAP13|RRAS2|DOCK9|ARHGEF12|RAB38|KANK2|ITSN2|RAB6B|FGD6|DEPDC1B|PLEKHG5|ARHGAP20|USP28|ARHGAP10|SPRY4|ARHGEF39|ARHGAP33|RAB39B|ARAP2|RHEBL1|FGD4|ARHGAP42|AMOT|TRIM67	-1.46317	0	60	1	1	-3.27458	2.16508
1	-3.26128	GO:0060041	M1	1	0	GO Biological Processes	19	retina development in camera-type eye	-3.26128	2.38497	3.92026	24155	144	1266	18	1.4218	0.332731	581|793|2779|3913|4628|4760|5797|5979|6497|7068|9355|10083|23210|25806|25945|28514|220202|256297	BAX|CALB1|GNAT1|LAMB2|MYH10|NEUROD1|PTPRM|RET|SKI|THRB|LHX2|USH1C|JMJD6|VAX2|NECTIN3|DLL1|ATOH7|PTF1A	-1.45538	0	61	1	1	-3.26128	2.38497
1	-3.25801	GO:0097021	M1	1	0	GO Biological Processes	19	lymphocyte migration into lymphoid organs	-3.25801	14.3098	6.26085	24155	4	1266	3	0.236967	0.136651	5979|9048|65125	RET|ARTN|WNK1	-1.45538	0	62	1	1	-3.25801	14.3098
1	-3.25801	GO:0032447	M1	1	0	GO Biological Processes	19	protein urmylation	-3.25801	14.3098	6.26085	24155	4	1266	3	0.236967	0.136651	81605|90353|348180	URM1|CTU1|CTU2	-1.45538	0	63	1	1	-3.25801	14.3098
1	-3.25801	GO:0015743	M1	1	0	GO Biological Processes	19	malate transport	-3.25801	14.3098	6.26085	24155	4	1266	3	0.236967	0.136651	1468|8402|253512	SLC25A10|SLC25A11|SLC25A30	-1.45538	0	64	1	1	-3.25801	14.3098
1	-3.25801	GO:0071423	M1	1	0	GO Biological Processes	19	malate transmembrane transport	-3.25801	14.3098	6.26085	24155	4	1266	3	0.236967	0.136651	1468|8402|253512	SLC25A10|SLC25A11|SLC25A30	-1.45538	0	64	0	0	-3.25801	14.3098
1	-3.22724	GO:0034508	M1	1	0	GO Biological Processes	19	centromere complex assembly	-3.22724	3.4071	4.24118	24155	56	1266	10	0.789889	0.248796	1058|8363|11339|55355|55839|64946|79019|79682|387103|401541	CENPA|H4C11|OIP5|HJURP|CENPN|CENPH|CENPM|CENPU|CENPW|CENPP	-1.42979	0	7	0	0	-9.46648	6.35993
1	-3.22866	GO:1903362	M1	1	0	GO Biological Processes	19	regulation of cellular protein catabolic process	-3.22866	2.0084	3.74634	24155	247	1266	26	2.05371	0.398609	3077|4983|5347|5704|5886|5962|6449|6790|7110|7337|8945|9655|9683|9695|22933|23640|25820|28952|29761|51684|55743|55823|55872|144165|153769|440730	HFE|OPHN1|PLK1|PSMC4|RAD23A|RDX|SGTA|AURKA|TMF1|UBE3A|BTRC|SOCS5|N4BP1|EDEM1|SIRT2|HSPBP1|ARIH1|CCDC22|USP25|SUFU|CHFR|VPS11|PBK|PRICKLE1|SH3RF2|TRIM67	-1.42979	0	14	0	0	-6.44798	2.55948
1	-3.22724	GO:0006977	M1	1	0	GO Biological Processes	19	DNA damage response, signal transduction by p53 class mediator resulting in cell cycle arrest	-3.22724	3.4071	4.24118	24155	56	1266	10	0.789889	0.248796	581|891|983|995|1869|3276|5111|5934|6790|51512	BAX|CCNB1|CDK1|CDC25C|E2F1|PRMT1|PCNA|RBL2|AURKA|GTSE1	-1.42979	0	15	0	0	-5.96857	3.4071
1	-3.22421	GO:0006997	M1	1	0	GO Biological Processes	19	nucleus organization	-3.22421	2.43877	3.913	24155	133	1266	17	1.34281	0.323486	891|983|1760|3148|5347|6314|7110|7443|9133|10015|11189|26092|55135|55165|79188|80346|91754	CCNB1|CDK1|DMPK|HMGB2|PLK1|ATXN7|TMF1|VRK1|CCNB2|PDCD6IP|CELF3|TOR1AIP1|WRAP53|CEP55|TMEM43|REEP4|NEK9	-1.42847	0	27	0	0	-4.84158	9.53989
1	-3.21997	GO:0000132	M1	1	0	GO Biological Processes	19	establishment of mitotic spindle orientation	-3.21997	4.60546	4.56894	24155	29	1266	7	0.552923	0.208407	1058|4085|5347|9183|10253|10403|89958	CENPA|MAD2L1|PLK1|ZW10|SPRY2|NDC80|SAPCD2	-1.42593	0	6	0	0	-10.0764	6.73404
1	-3.21824	GO:0017157	M1	1	0	GO Biological Processes	19	regulation of exocytosis	-3.21824	2.07201	3.76518	24155	221	1266	24	1.89573	0.38328	1138|1141|4851|5170|5865|5873|5874|6248|6385|6855|6860|8941|9001|9341|9515|9581|10015|10814|11267|22930|23086|57586|192683|594855	CHRNA5|CHRNB2|NOTCH1|PDPK1|RAB3B|RAB27A|RAB27B|RSC1A1|SDC4|SYP|SYT4|CDK5R2|HAP1|VAMP3|STXBP5L|PREPL|PDCD6IP|CPLX2|SNF8|RAB3GAP1|EXPH5|SYT13|SCAMP5|CPLX3	-1.4259	0	9	0	0	-7.95771	2.44613
1	-3.18411	GO:0099537	M1	1	0	GO Biological Processes	19	trans-synaptic signaling	-3.18411	1.5499	3.50785	24155	714	1266	58	4.58136	0.58762	773|793|816|991|1056|1136|1138|1141|1759|1956|1979|2905|2914|3060|3265|4983|5026|5581|5865|6616|6750|6855|6860|7779|8484|8867|9001|9094|9101|9148|9378|9515|9546|9581|9900|9990|10590|10814|11255|22930|22941|23542|51248|55584|57282|57449|57497|64130|80208|84446|84628|84902|91978|124925|254263|347733|353174|594855	CACNA1A|CALB1|CAMK2B|CDC20|CEL|CHRNA3|CHRNA5|CHRNB2|DNM1|EGFR|EIF4EBP2|GRIN2C|GRM4|HCRT|HRAS|OPHN1|P2RX5|PRKCE|RAB3B|SNAP25|SST|SYP|SYT4|SLC30A1|GALR3|SYNJ1|HAP1|UNC119|USP8|NEURL1|NRXN1|STXBP5L|APBA3|PREPL|SV2A|SLC12A6|SCGN|CPLX2|HRH3|RAB3GAP1|SHANK2|MAPK8IP2|PDZD11|CHRNA9|SLC4A10|PLEKHG5|LRFN2|LIN7B|SPG11|BRSK1|NTNG2|CEP89|TPGS1|SEZ6|CNIH2|TUBB2B|ZACN|CPLX3	-1.39346	0	9	0	0	-7.95771	2.44613
1	-3.18079	GO:0000904	M1	1	0	GO Biological Processes	19	cell morphogenesis involved in differentiation	-3.18079	1.53663	3.49903	24155	745	1266	60	4.73934	0.597171	288|558|596|816|1136|1141|1501|1690|1969|2046|2050|2115|2664|2803|3398|3475|3730|3800|3913|3925|4009|4070|4628|4739|4851|4983|5797|5979|6239|6474|7337|8301|9048|9341|9355|9378|9637|10048|10381|10512|22941|23077|23542|23543|25806|25942|50674|51188|53834|56896|57498|59277|80128|80208|84446|84612|84628|115703|347733|375790	ANK3|AXL|BCL2|CAMK2B|CHRNA3|CHRNB2|CTNND2|COCH|EPHA2|EPHA8|EPHB4|ETV1|GDI1|GOLGA4|ID2|IFRD1|ANOS1|KIF5C|LAMB2|STMN1|LMX1A|TACSTD2|MYH10|NEDD9|NOTCH1|OPHN1|PTPRM|RET|RREB1|SHOX2|UBE3A|PICALM|ARTN|VAMP3|LHX2|NRXN1|FEZ2|RANBP9|TUBB3|SEMA3C|SHANK2|MYCBP2|MAPK8IP2|RBFOX2|VAX2|SIN3A|NEUROG3|SS18L2|FGFRL1|DPYSL5|KIDINS220|NTN4|TRIM46|SPG11|BRSK1|PARD6B|NTNG2|ARHGAP33|TUBB2B|AGRN	-1.39183	0	19	0	0	-5.53981	1.81575
1	-3.16805	GO:0034728	M1	1	0	GO Biological Processes	19	nucleosome organization	-3.16805	2.17758	3.77099	24155	184	1266	21	1.65877	0.358958	546|1058|3014|3148|8345|8352|8363|8968|8971|9555|10036|11339|29855|55355|55723|55839|64946|79019|79682|387103|401541	ATRX|CENPA|H2AX|HMGB2|H2BC9|H3C3|H4C11|H3C7|H1-10|MACROH2A1|CHAF1A|OIP5|UBN1|HJURP|ASF1B|CENPN|CENPH|CENPM|CENPU|CENPW|CENPP	-1.38244	0	7	0	0	-9.46648	6.35993
1	-3.16805	GO:2000045	M1	1	0	GO Biological Processes	19	regulation of G1/S transition of mitotic cell cycle	-3.16805	2.17758	3.77099	24155	184	1266	21	1.65877	0.358958	581|596|891|983|995|1019|1032|1869|1956|2146|3276|3398|5111|5934|5962|6790|8318|10217|25959|26057|51512	BAX|BCL2|CCNB1|CDK1|CDC25C|CDK4|CDKN2D|E2F1|EGFR|EZH2|PRMT1|ID2|PCNA|RBL2|RDX|AURKA|CDC45|CTDSPL|KANK2|ANKRD17|GTSE1	-1.38244	0	15	0	0	-5.96857	3.4071
1	-3.16406	GO:0072431	M1	1	0	GO Biological Processes	19	signal transduction involved in mitotic G1 DNA damage checkpoint	-3.16406	3.34733	4.17272	24155	57	1266	10	0.789889	0.248796	581|891|983|995|1869|3276|5111|5934|6790|51512	BAX|CCNB1|CDK1|CDC25C|E2F1|PRMT1|PCNA|RBL2|AURKA|GTSE1	-1.38179	0	15	0	0	-5.96857	3.4071
1	-3.16406	GO:1902400	M1	1	0	GO Biological Processes	19	intracellular signal transduction involved in G1 DNA damage checkpoint	-3.16406	3.34733	4.17272	24155	57	1266	10	0.789889	0.248796	581|891|983|995|1869|3276|5111|5934|6790|51512	BAX|CCNB1|CDK1|CDC25C|E2F1|PRMT1|PCNA|RBL2|AURKA|GTSE1	-1.38179	0	15	0	0	-5.96857	3.4071
1	-3.14449	GO:0051303	M1	1	0	GO Biological Processes	19	establishment of chromosome localization	-3.14449	2.93535	4.02628	24155	78	1266	12	0.947867	0.272326	891|3833|9183|10015|10403|10615|11004|55143|55165|81620|83540|84722	CCNB1|KIFC1|ZW10|PDCD6IP|NDC80|SPAG5|KIF2C|CDCA8|CEP55|CDT1|NUF2|PSRC1	-1.36387	0	20	0	0	-5.47165	7.94991
1	-3.14195	GO:0051650	M1	1	0	GO Biological Processes	19	establishment of vesicle localization	-3.14195	1.90142	3.63832	24155	291	1266	29	2.29068	0.420468	966|1138|1141|1759|2348|3800|5873|5874|6616|6855|6860|8301|8615|8867|9001|9515|9581|9900|10113|10814|11196|22872|22930|55717|79443|80128|80208|254263|594855	CD59|CHRNA5|CHRNB2|DNM1|FOLR1|KIF5C|RAB27A|RAB27B|SNAP25|SYP|SYT4|PICALM|USO1|SYNJ1|HAP1|STXBP5L|PREPL|SV2A|PREB|CPLX2|SEC23IP|SEC31A|RAB3GAP1|WDR11|FYCO1|TRIM46|SPG11|CNIH2|CPLX3	-1.36298	0	9	0	0	-7.95771	2.44613
1	-3.13858	GO:0070125	M1	1	0	GO Biological Processes	19	mitochondrial translational elongation	-3.13858	2.78693	3.97191	24155	89	1266	13	1.02686	0.283333	3396|6182|6183|10102|26284|28998|51116|51258|51642|57129|63875|90480|122704	MRPL58|MRPL12|MRPS12|TSFM|ERAL1|MRPL13|MRPS2|MRPL51|MRPL48|MRPL47|MRPL17|GADD45GIP1|MRPL52	-1.36125	0	65	1	1	-3.13858	2.78693
1	-3.13217	GO:0031099	M1	1	0	GO Biological Processes	19	regeneration	-3.13217	2.11998	3.72154	24155	198	1266	22	1.73776	0.367258	558|596|688|890|891|983|1019|1495|1956|2146|2348|3077|3475|3913|4548|4851|5111|5782|6790|7298|10076|57817	AXL|BCL2|KLF5|CCNA2|CCNB1|CDK1|CDK4|CTNNA1|EGFR|EZH2|FOLR1|HFE|IFRD1|LAMB2|MTR|NOTCH1|PCNA|PTPN12|AURKA|TYMS|PTPRU|HAMP	-1.35698	0	43	0	0	-4.01421	4.45195
1	-3.13104	GO:1904666	M1	1	0	GO Biological Processes	19	regulation of ubiquitin protein ligase activity	-3.13104	5.20358	4.63898	24155	22	1266	6	0.473934	0.193024	991|4085|5347|11065|26271|27338	CDC20|MAD2L1|PLK1|UBE2C|FBXO5|UBE2S	-1.35698	0	66	1	1	-3.13104	6.35993
1	-3.12449	GO:0097421	M1	1	0	GO Biological Processes	19	liver regeneration	-3.12449	4.45195	4.44927	24155	30	1266	7	0.552923	0.208407	1956|2146|3077|5111|6790|7298|57817	EGFR|EZH2|HFE|PCNA|AURKA|TYMS|HAMP	-1.35205	0	43	0	0	-4.01421	4.45195
1	-3.11705	GO:0051653	M1	1	0	GO Biological Processes	19	spindle localization	-3.11705	3.57746	4.20377	24155	48	1266	9	0.7109	0.236123	1058|4085|5347|9183|9700|10253|10403|51203|89958	CENPA|MAD2L1|PLK1|ZW10|ESPL1|SPRY2|NDC80|NUSAP1|SAPCD2	-1.35185	0	6	0	0	-10.0764	6.73404
1	-3.11626	GO:0045842	M1	1	0	GO Biological Processes	19	positive regulation of mitotic metaphase/anaphase transition	-3.11626	8.4799	5.27828	24155	9	1266	4	0.315956	0.157728	9700|51433|51529|81620	ESPL1|ANAPC5|ANAPC11|CDT1	-1.35185	0	22	0	0	-5.09181	8.4799
1	-3.11626	GO:1901970	M1	1	0	GO Biological Processes	19	positive regulation of mitotic sister chromatid separation	-3.11626	8.4799	5.27828	24155	9	1266	4	0.315956	0.157728	9700|51433|51529|81620	ESPL1|ANAPC5|ANAPC11|CDT1	-1.35185	0	22	0	0	-5.09181	8.4799
1	-3.11626	GO:0090129	M1	1	0	GO Biological Processes	19	positive regulation of synapse maturation	-3.11626	8.4799	5.27828	24155	9	1266	4	0.315956	0.157728	816|991|9148|9378	CAMK2B|CDC20|NEURL1|NRXN1	-1.35185	0	67	1	1	-3.11626	8.4799
1	-3.11626	GO:1903431	M1	1	0	GO Biological Processes	19	positive regulation of cell maturation	-3.11626	8.4799	5.27828	24155	9	1266	4	0.315956	0.157728	596|5979|6790|22933	BCL2|RET|AURKA|SIRT2	-1.35185	0	68	1	1	-3.11626	8.4799
1	-3.11252	GO:0016055	M1	1	0	GO Biological Processes	19	Wnt signaling pathway	-3.11252	1.64481	3.50271	24155	522	1266	45	3.5545	0.520372	324|558|861|1175|1432|1500|1501|1956|2348|2776|2870|4163|4851|5216|5300|5688|5691|5692|5694|5704|5719|6497|6928|6934|7097|7477|8796|8945|9101|9350|9646|10076|10856|25806|51384|51421|55789|65125|85458|130612|144165|192670|205147|283149|441478	APC|AXL|RUNX1|AP2S1|MAPK14|CTNND1|CTNND2|EGFR|FOLR1|GNAQ|GRK6|MCC|NOTCH1|PFN1|PIN1|PSMA7|PSMB3|PSMB4|PSMB6|PSMC4|PSMD13|SKI|HNF1B|TCF7L2|TLR2|WNT7B|SCEL|BTRC|USP8|CER1|CTR9|PTPRU|RUVBL2|VAX2|WNT16|AMOTL2|DEPDC1B|WNK1|DIXDC1|TMEM198|PRICKLE1|AGO4|AMER3|BCL9L|NRARP	-1.34969	0	30	0	0	-4.72472	1.80124
1	-3.10659	GO:0016311	M1	1	0	GO Biological Processes	19	dephosphorylation	-3.10659	1.67647	3.51313	24155	478	1266	42	3.31754	0.503344	250|476|596|993|994|995|1033|1408|1760|2822|3673|4907|5300|5531|5780|5782|5783|5797|8867|8945|9088|9108|9665|10076|10217|10395|11099|11156|11284|22843|22908|28227|51207|57026|63898|64062|65125|92609|153769|157313|161742|259282	ALPP|ATP1A1|BCL2|CDC25A|CDC25B|CDC25C|CDKN3|CRY2|DMPK|GPLD1|ITGA2|NT5E|PIN1|PPP4C|PTPN9|PTPN12|PTPN13|PTPRM|SYNJ1|BTRC|PKMYT1|MTMR7|MARF1|PTPRU|CTDSPL|DLC1|PTPN21|PTP4A3|PNKP|PPM1E|SACM1L|PPP2R3B|DUSP13|PDXP|SH2D4A|RBM26|WNK1|TIMM50|SH3RF2|CDCA2|SPRED1|BOD1L1	-1.34535	0	69	1	1	-3.10659	2.61879
1	-3.09379	GO:0007032	M1	1	0	GO Biological Processes	19	endosome organization	-3.09379	2.89819	3.97429	24155	79	1266	12	0.947867	0.272326	1759|5873|8867|9101|10015|10228|10254|11267|55111|55823|149371|257364	DNM1|RAB27A|SYNJ1|USP8|PDCD6IP|STX6|STAM2|SNF8|PLEKHJ1|VPS11|EXOC8|SNX33	-1.3357	0	10	0	0	-7.30707	2.89819
1	-3.09379	GO:0050000	M1	1	0	GO Biological Processes	19	chromosome localization	-3.09379	2.89819	3.97429	24155	79	1266	12	0.947867	0.272326	891|3833|9183|10015|10403|10615|11004|55143|55165|81620|83540|84722	CCNB1|KIFC1|ZW10|PDCD6IP|NDC80|SPAG5|KIF2C|CDCA8|CEP55|CDT1|NUF2|PSRC1	-1.3357	0	20	0	0	-5.47165	7.94991
1	-3.07836	GO:0198738	M1	1	0	GO Biological Processes	19	cell-cell signaling by wnt	-3.07836	1.63853	3.4754	24155	524	1266	45	3.5545	0.520372	324|558|861|1175|1432|1500|1501|1956|2348|2776|2870|4163|4851|5216|5300|5688|5691|5692|5694|5704|5719|6497|6928|6934|7097|7477|8796|8945|9101|9350|9646|10076|10856|25806|51384|51421|55789|65125|85458|130612|144165|192670|205147|283149|441478	APC|AXL|RUNX1|AP2S1|MAPK14|CTNND1|CTNND2|EGFR|FOLR1|GNAQ|GRK6|MCC|NOTCH1|PFN1|PIN1|PSMA7|PSMB3|PSMB4|PSMB6|PSMC4|PSMD13|SKI|HNF1B|TCF7L2|TLR2|WNT7B|SCEL|BTRC|USP8|CER1|CTR9|PTPRU|RUVBL2|VAX2|WNT16|AMOTL2|DEPDC1B|WNK1|DIXDC1|TMEM198|PRICKLE1|AGO4|AMER3|BCL9L|NRARP	-1.32183	0	30	0	0	-4.72472	1.80124
1	-3.0755	GO:2000134	M1	1	0	GO Biological Processes	19	negative regulation of G1/S transition of mitotic cell cycle	-3.0755	2.44221	3.80194	24155	125	1266	16	1.26382	0.313953	581|596|891|983|995|1019|1032|1869|2146|3276|5111|5934|6790|10217|25959|51512	BAX|BCL2|CCNB1|CDK1|CDC25C|CDK4|CDKN2D|E2F1|EZH2|PRMT1|PCNA|RBL2|AURKA|CTDSPL|KANK2|GTSE1	-1.32053	0	15	0	0	-5.96857	3.4071
1	-3.06498	GO:0000723	M1	1	0	GO Biological Processes	19	telomere maintenance	-3.06498	2.23775	3.71746	24155	162	1266	19	1.50079	0.341711	546|2237|4751|5111|5427|5888|5889|5982|5984|7012|8363|9134|9212|9401|11284|55135|79035|80119|140609	ATRX|FEN1|NEK2|PCNA|POLE2|RAD51|RAD51C|RFC2|RFC4|TERC|H4C11|CCNE2|AURKB|RECQL4|PNKP|WRAP53|NABP2|PIF1|NEK7	-1.31156	0	56	0	0	-3.45945	5.6117
1	-3.06005	GO:0021549	M1	1	0	GO Biological Processes	19	cerebellum development	-3.06005	2.61879	3.85305	24155	102	1266	14	1.10585	0.293911	372|538|2146|3746|4009|4628|4760|4983|8941|9001|28514|51286|124925|256297	ARCN1|ATP7A|EZH2|KCNC1|LMX1A|MYH10|NEUROD1|OPHN1|CDK5R2|HAP1|DLL1|CEND1|SEZ6|PTF1A	-1.30972	0	46	0	0	-3.86022	9.53989
1	-3.06005	GO:0035335	M1	1	0	GO Biological Processes	19	peptidyl-tyrosine dephosphorylation	-3.06005	2.61879	3.85305	24155	102	1266	14	1.10585	0.293911	993|994|995|1033|5780|5782|5783|5797|9108|10076|11099|11156|51207|92609	CDC25A|CDC25B|CDC25C|CDKN3|PTPN9|PTPN12|PTPN13|PTPRM|MTMR7|PTPRU|PTPN21|PTP4A3|DUSP13|TIMM50	-1.30972	0	69	0	0	-3.10659	2.61879
1	-3.04237	GO:0090307	M1	1	0	GO Biological Processes	19	mitotic spindle assembly	-3.04237	3.23386	4.04024	24155	59	1266	10	0.789889	0.248796	332|991|3833|4605|4751|5347|9212|10015|22974|24137	BIRC5|CDC20|KIFC1|MYBL2|NEK2|PLK1|AURKB|PDCD6IP|TPX2|KIF4A	-1.30269	0	1	0	0	-24.5586	4.83189
1	-3.04237	GO:0072413	M1	1	0	GO Biological Processes	19	signal transduction involved in mitotic cell cycle checkpoint	-3.04237	3.23386	4.04024	24155	59	1266	10	0.789889	0.248796	581|891|983|995|1869|3276|5111|5934|6790|51512	BAX|CCNB1|CDK1|CDC25C|E2F1|PRMT1|PCNA|RBL2|AURKA|GTSE1	-1.30269	0	15	0	0	-5.96857	3.4071
1	-3.04237	GO:1902402	M1	1	0	GO Biological Processes	19	signal transduction involved in mitotic DNA damage checkpoint	-3.04237	3.23386	4.04024	24155	59	1266	10	0.789889	0.248796	581|891|983|995|1869|3276|5111|5934|6790|51512	BAX|CCNB1|CDK1|CDC25C|E2F1|PRMT1|PCNA|RBL2|AURKA|GTSE1	-1.30269	0	15	0	0	-5.96857	3.4071
1	-3.04237	GO:1902403	M1	1	0	GO Biological Processes	19	signal transduction involved in mitotic DNA integrity checkpoint	-3.04237	3.23386	4.04024	24155	59	1266	10	0.789889	0.248796	581|891|983|995|1869|3276|5111|5934|6790|51512	BAX|CCNB1|CDK1|CDC25C|E2F1|PRMT1|PCNA|RBL2|AURKA|GTSE1	-1.30269	0	15	0	0	-5.96857	3.4071
1	-3.04332	GO:0042752	M1	1	0	GO Biological Processes	19	regulation of circadian rhythm	-3.04332	2.5105	3.80184	24155	114	1266	15	1.18483	0.304105	983|1141|1408|2146|2776|3398|6839|7337|8863|8914|8945|9967|25942|26224|220202	CDK1|CHRNB2|CRY2|EZH2|GNAQ|ID2|SUV39H1|UBE3A|PER3|TIMELESS|BTRC|THRAP3|SIN3A|FBXL3|ATOH7	-1.30269	0	26	0	0	-4.88157	4.23995
1	-3.0493	GO:0051445	M1	1	0	GO Biological Processes	19	regulation of meiotic cell cycle	-3.0493	3.50445	4.12711	24155	49	1266	9	0.7109	0.236123	991|993|994|995|2827|9319|22933|26271|286151	CDC20|CDC25A|CDC25B|CDC25C|GPR3|TRIP13|SIRT2|FBXO5|FBXO43	-1.30269	0	32	0	0	-4.68849	9.53989
1	-3.0493	GO:0034260	M1	1	0	GO Biological Processes	19	negative regulation of GTPase activity	-3.0493	3.50445	4.12711	24155	49	1266	9	0.7109	0.236123	399|2873|3265|3843|5962|10253|65125|132864|154796	RHOH|GPS1|HRAS|IPO5|RDX|SPRY2|WNK1|CPEB2|AMOT	-1.30269	0	70	1	1	-3.0493	3.50445
1	-3.03325	GO:0051345	M1	1	0	GO Biological Processes	19	positive regulation of hydrolase activity	-3.03325	1.50955	3.38187	24155	771	1266	61	4.81833	0.601877	581|837|858|1432|1663|1956|1969|2146|2261|2664|2776|2779|2822|3092|3148|3265|3336|3673|4739|4983|5111|5170|5216|5300|5902|7186|7813|8301|8655|9141|9515|9705|9966|10113|10395|11047|22841|22930|23161|23234|23348|23365|23397|26092|26355|51256|54885|55789|56616|57569|64215|79658|80758|93627|112574|115703|116984|143872|221477|375790|414060	BAX|CASP4|CAV2|MAPK14|DDX11|EGFR|EPHA2|EZH2|FGFR3|GDI1|GNAQ|GNAT1|GPLD1|HIP1|HMGB2|HRAS|HSPE1|ITGA2|NEDD9|OPHN1|PCNA|PDPK1|PFN1|PIN1|RANBP1|TRAF2|EVI5|PICALM|DYNLL1|PDCD5|STXBP5L|ST18|TNFSF15|PREB|DLC1|ADRM1|RAB11FIP2|RAB3GAP1|SNX13|DNAJC9|DOCK9|ARHGEF12|NCAPH|TOR1AIP1|FAM162A|TBC1D7|TBC1D8B|DEPDC1B|DIABLO|ARHGAP20|DNAJC1|ARHGAP10|PRR7|TBCK|SNX18|ARHGAP33|ARAP2|ARHGAP42|C6orf89|AGRN|TBC1D3C	-1.29507	0	53	0	0	-3.63632	1.75263
1	-3.03155	GO:0030111	M1	1	0	GO Biological Processes	19	regulation of Wnt signaling pathway	-3.03155	1.77244	3.50199	24155	366	1266	34	2.68562	0.454354	324|861|1432|1500|1501|1956|2348|2776|4163|4851|5300|5688|5691|5692|5694|5704|5719|6497|6928|6934|7097|8796|8945|9101|9350|10076|10856|55789|65125|85458|130612|144165|205147|441478	APC|RUNX1|MAPK14|CTNND1|CTNND2|EGFR|FOLR1|GNAQ|MCC|NOTCH1|PIN1|PSMA7|PSMB3|PSMB4|PSMB6|PSMC4|PSMD13|SKI|HNF1B|TCF7L2|TLR2|SCEL|BTRC|USP8|CER1|PTPRU|RUVBL2|DEPDC1B|WNK1|DIXDC1|TMEM198|PRICKLE1|AMER3|NRARP	-1.29486	0	30	0	0	-4.72472	1.80124
1	-3.02217	GO:0007409	M1	1	0	GO Biological Processes	19	axonogenesis	-3.02217	1.67152	3.45004	24155	468	1266	41	3.23855	0.497519	288|596|1141|1969|2046|2050|2115|2664|2803|3475|3730|3800|3913|3925|4009|4628|4851|4983|5797|5979|6474|8301|9048|9355|9378|9637|10048|10381|10512|23077|25806|25942|56896|59277|80128|80208|84446|84612|84628|347733|375790	ANK3|BCL2|CHRNB2|EPHA2|EPHA8|EPHB4|ETV1|GDI1|GOLGA4|IFRD1|ANOS1|KIF5C|LAMB2|STMN1|LMX1A|MYH10|NOTCH1|OPHN1|PTPRM|RET|SHOX2|PICALM|ARTN|LHX2|NRXN1|FEZ2|RANBP9|TUBB3|SEMA3C|MYCBP2|VAX2|SIN3A|DPYSL5|NTN4|TRIM46|SPG11|BRSK1|PARD6B|NTNG2|TUBB2B|AGRN	-1.28697	0	19	0	0	-5.53981	1.81575
1	-3.01931	GO:0007064	M1	1	0	GO Biological Processes	19	mitotic sister chromatid cohesion	-3.01931	4.97733	4.48805	24155	23	1266	6	0.473934	0.193024	546|991|9555|23244|79075|83903	ATRX|CDC20|MACROH2A1|PDS5A|DSCC1|HASPIN	-1.2856	0	21	0	0	-5.43536	4.97733
1	-3.01636	GO:2000058	M1	1	0	GO Biological Processes	19	regulation of ubiquitin-dependent protein catabolic process	-3.01636	2.27441	3.69449	24155	151	1266	18	1.4218	0.332731	3077|5347|5886|6449|6790|7337|9655|9683|22933|23640|25820|28952|51684|55743|55872|144165|153769|440730	HFE|PLK1|RAD23A|SGTA|AURKA|UBE3A|SOCS5|N4BP1|SIRT2|HSPBP1|ARIH1|CCDC22|SUFU|CHFR|PBK|PRICKLE1|SH3RF2|TRIM67	-1.28557	0	14	0	0	-6.44798	2.55948
1	-3.01632	GO:1902806	M1	1	0	GO Biological Processes	19	regulation of cell cycle G1/S phase transition	-3.01632	2.078	3.61835	24155	202	1266	22	1.73776	0.367258	581|596|891|983|995|1019|1032|1869|1956|2146|3276|3398|5111|5934|5962|6790|8318|10217|25959|26057|51512|56241	BAX|BCL2|CCNB1|CDK1|CDC25C|CDK4|CDKN2D|E2F1|EGFR|EZH2|PRMT1|ID2|PCNA|RBL2|RDX|AURKA|CDC45|CTDSPL|KANK2|ANKRD17|GTSE1|SUSD2	-1.28557	0	15	0	0	-5.96857	3.4071
1	-3.00253	GO:0051056	M1	1	0	GO Biological Processes	19	regulation of small GTPase mediated signal transduction	-3.00253	1.80104	3.49316	24155	339	1266	32	2.52765	0.441146	399|2059|2245|2664|2859|3265|3925|4851|4983|5962|9265|9828|10253|10395|10603|11214|23365|25959|50618|55785|55789|57449|57569|79658|81848|84904|115703|116984|121512|143872|154796|440730	RHOH|EPS8|FGD1|GDI1|GPR35|HRAS|STMN1|NOTCH1|OPHN1|RDX|CYTH3|ARHGEF17|SPRY2|DLC1|SH2B2|AKAP13|ARHGEF12|KANK2|ITSN2|FGD6|DEPDC1B|PLEKHG5|ARHGAP20|ARHGAP10|SPRY4|ARHGEF39|ARHGAP33|ARAP2|FGD4|ARHGAP42|AMOT|TRIM67	-1.27325	0	60	0	0	-3.27458	2.16508
1	-2.99537	GO:0061564	M1	1	0	GO Biological Processes	19	axon development	-2.99537	1.63329	3.41309	24155	514	1266	44	3.47551	0.514768	288|596|1141|1495|1969|2046|2050|2115|2348|2664|2803|3475|3730|3800|3913|3925|4009|4548|4628|4851|4983|5797|5979|6474|8301|9048|9355|9378|9637|10048|10381|10512|23077|25806|25942|56896|59277|80128|80208|84446|84612|84628|347733|375790	ANK3|BCL2|CHRNB2|CTNNA1|EPHA2|EPHA8|EPHB4|ETV1|FOLR1|GDI1|GOLGA4|IFRD1|ANOS1|KIF5C|LAMB2|STMN1|LMX1A|MTR|MYH10|NOTCH1|OPHN1|PTPRM|RET|SHOX2|PICALM|ARTN|LHX2|NRXN1|FEZ2|RANBP9|TUBB3|SEMA3C|MYCBP2|VAX2|SIN3A|DPYSL5|NTN4|TRIM46|SPG11|BRSK1|PARD6B|NTNG2|TUBB2B|AGRN	-1.26755	0	19	0	0	-5.53981	1.81575
1	-2.98375	GO:0043486	M1	1	0	GO Biological Processes	19	histone exchange	-2.98375	3.17996	3.97612	24155	60	1266	10	0.789889	0.248796	1058|8363|11339|55355|55839|64946|79019|79682|387103|401541	CENPA|H4C11|OIP5|HJURP|CENPN|CENPH|CENPM|CENPU|CENPW|CENPP	-1.25739	0	7	0	0	-9.46648	6.35993
1	-2.97695	GO:0036124	M1	1	0	GO Biological Processes	19	histone H3-K9 trimethylation	-2.97695	5.96243	4.66974	24155	16	1266	5	0.394945	0.176276	546|5926|6839|51742|55011	ATRX|ARID4A|SUV39H1|ARID4B|PIH1D1	-1.25205	0	39	0	0	-4.09486	5.96243
1	-2.95824	GO:0006333	M1	1	0	GO Biological Processes	19	chromatin assembly or disassembly	-2.95824	2.09778	3.58219	24155	191	1266	21	1.65877	0.358958	546|1058|3014|3148|8345|8352|8363|8968|8971|9555|10036|11339|29855|55355|55723|55839|64946|79019|79682|387103|401541	ATRX|CENPA|H2AX|HMGB2|H2BC9|H3C3|H4C11|H3C7|H1-10|MACROH2A1|CHAF1A|OIP5|UBN1|HJURP|ASF1B|CENPN|CENPH|CENPM|CENPU|CENPW|CENPP	-1.23478	0	7	0	0	-9.46648	6.35993
1	-2.94737	GO:0071158	M1	1	0	GO Biological Processes	19	positive regulation of cell cycle arrest	-2.94737	2.79216	3.82311	24155	82	1266	12	0.947867	0.272326	581|891|983|995|1869|3276|3398|3642|5111|5934|6790|51512	BAX|CCNB1|CDK1|CDC25C|E2F1|PRMT1|ID2|INSM1|PCNA|RBL2|AURKA|GTSE1	-1.2282	0	15	0	0	-5.96857	3.4071
1	-2.9461	GO:0043001	M1	1	0	GO Biological Processes	19	Golgi to plasma membrane protein transport	-2.9461	3.72288	4.10378	24155	41	1266	8	0.631912	0.222707	288|582|2803|8548|9341|9581|9648|91461	ANK3|BBS1|GOLGA4|BLZF1|VAMP3|PREPL|GCC2|PKDCC	-1.2282	0	45	0	0	-3.9053	3.72288
1	-2.9461	GO:0045005	M1	1	0	GO Biological Processes	19	DNA-dependent DNA replication maintenance of fidelity	-2.9461	3.72288	4.10378	24155	41	1266	8	0.631912	0.222707	546|1663|5111|5888|8914|10189|146956|259282	ATRX|DDX11|PCNA|RAD51|TIMELESS|ALYREF|EME1|BOD1L1	-1.2282	0	71	1	1	-2.9461	7.15492
1	-2.94591	GO:0031297	M1	1	0	GO Biological Processes	19	replication fork processing	-2.94591	4.1737	4.22497	24155	32	1266	7	0.552923	0.208407	546|1663|5111|5888|10189|146956|259282	ATRX|DDX11|PCNA|RAD51|ALYREF|EME1|BOD1L1	-1.2282	0	71	0	0	-2.9461	7.15492
1	-2.94293	GO:0072657	M1	1	0	GO Biological Processes	19	protein localization to membrane	-2.94293	1.56191	3.34178	24155	623	1266	51	4.02844	0.552615	288|581|582|596|1869|1956|1969|2040|2664|2803|2905|3002|3265|5170|5581|5780|5865|5962|6449|6616|7429|8301|8548|8631|8636|9141|9312|9341|9375|9378|9581|9648|22841|22844|22930|23682|25945|26519|29993|30846|51248|51308|55176|55625|64130|64398|81926|91461|115548|221914|375790	ANK3|BAX|BBS1|BCL2|E2F1|EGFR|EPHA2|STOM|GDI1|GOLGA4|GRIN2C|GZMB|HRAS|PDPK1|PRKCE|PTPN9|RAB3B|RDX|SGTA|SNAP25|VIL1|PICALM|BLZF1|SKAP1|SSNA1|PDCD5|KCNB2|VAMP3|TM9SF2|NRXN1|PREPL|GCC2|RAB11FIP2|FRMPD1|RAB3GAP1|RAB38|NECTIN3|TIMM10|PACSIN1|EHD2|PDZD11|REEP2|SEC61A2|ZDHHC7|LIN7B|MPP5|ABHD17A|PKDCC|FCHO2|GPC2|AGRN	-1.22665	0	16	0	0	-5.74654	2.18948
1	-2.93573	GO:1903364	M1	1	0	GO Biological Processes	19	positive regulation of cellular protein catabolic process	-2.93573	2.3004	3.6421	24155	141	1266	17	1.34281	0.323486	5347|5704|5886|5962|6449|6790|9655|9695|22933|23640|25820|28952|55743|55823|144165|153769|440730	PLK1|PSMC4|RAD23A|RDX|SGTA|AURKA|SOCS5|EDEM1|SIRT2|HSPBP1|ARIH1|CCDC22|CHFR|VPS11|PRICKLE1|SH3RF2|TRIM67	-1.22087	0	14	0	0	-6.44798	2.55948
1	-2.91279	GO:1902101	M1	1	0	GO Biological Processes	19	positive regulation of metaphase/anaphase transition of cell cycle	-2.91279	7.63191	4.93314	24155	10	1266	4	0.315956	0.157728	9700|51433|51529|81620	ESPL1|ANAPC5|ANAPC11|CDT1	-1.20357	0	22	0	0	-5.09181	8.4799
1	-2.91279	GO:0042428	M1	1	0	GO Biological Processes	19	serotonin metabolic process	-2.91279	7.63191	4.93314	24155	10	1266	4	0.315956	0.157728	538|1644|7166|121278	ATP7A|DDC|TPH1|TPH2	-1.20357	0	47	0	0	-3.8427	19.0798
1	-2.91279	GO:0035090	M1	1	0	GO Biological Processes	19	maintenance of apical/basal cell polarity	-2.91279	7.63191	4.93314	24155	10	1266	4	0.315956	0.157728	9355|10015|51248|64130	LHX2|PDCD6IP|PDZD11|LIN7B	-1.20357	0	72	1	1	-2.91279	7.63191
1	-2.91279	GO:0045199	M1	1	0	GO Biological Processes	19	maintenance of epithelial cell apical/basal polarity	-2.91279	7.63191	4.93314	24155	10	1266	4	0.315956	0.157728	9355|10015|51248|64130	LHX2|PDCD6IP|PDZD11|LIN7B	-1.20357	0	72	0	0	-2.91279	7.63191
1	-2.89901	GO:0032870	M1	1	0	GO Biological Processes	19	cellular response to hormone stimulus	-2.89901	1.51987	3.28987	24155	703	1266	56	4.42338	0.577878	115|324|440|476|534|858|861|890|1019|1109|1136|1141|1408|1535|1956|1978|1979|2046|2776|2822|3015|3673|4141|4306|4851|5106|5170|5241|5286|5581|5962|6750|7026|7068|7337|8615|8896|9101|9296|10603|10768|10856|11214|11255|23235|23543|25959|26291|29988|55777|64397|65985|132864|155066|375790|493829	ADCY9|APC|ASNS|ATP1A1|ATP6V1G2|CAV2|RUNX1|CCNA2|CDK4|AKR1C4|CHRNA3|CHRNB2|CRY2|CYBA|EGFR|EIF4EBP1|EIF4EBP2|EPHA8|GNAQ|GPLD1|H2AZ1|ITGA2|MARS1|NR3C2|NOTCH1|PCK2|PDPK1|PGR|PIK3C2A|PRKCE|RDX|SST|NR2F2|THRB|UBE3A|USO1|BUD31|USP8|ATP6V1F|SH2B2|AHCYL1|RUVBL2|AKAP13|HRH3|SIK2|RBFOX2|KANK2|FGF21|SLC2A8|MBD5|ZNF106|AACS|CPEB2|ATP6V0E2|AGRN|TRIM72	-1.19119	0	29	0	0	-4.75763	2.00138
1	-2.8774	GO:0042435	M1	1	0	GO Biological Processes	19	indole-containing compound biosynthetic process	-2.8774	11.4479	5.4948	24155	5	1266	3	0.236967	0.136651	1644|7166|121278	DDC|TPH1|TPH2	-1.17925	0	47	0	0	-3.8427	19.0798
1	-2.8774	GO:0046219	M1	1	0	GO Biological Processes	19	indolalkylamine biosynthetic process	-2.8774	11.4479	5.4948	24155	5	1266	3	0.236967	0.136651	1644|7166|121278	DDC|TPH1|TPH2	-1.17925	0	47	0	0	-3.8427	19.0798
1	-2.8774	GO:1901162	M1	1	0	GO Biological Processes	19	primary amino compound biosynthetic process	-2.8774	11.4479	5.4948	24155	5	1266	3	0.236967	0.136651	1644|7166|121278	DDC|TPH1|TPH2	-1.17925	0	47	0	0	-3.8427	19.0798
1	-2.8774	GO:1901995	M1	1	0	GO Biological Processes	19	positive regulation of meiotic cell cycle phase transition	-2.8774	11.4479	5.4948	24155	5	1266	3	0.236967	0.136651	993|994|995	CDC25A|CDC25B|CDC25C	-1.17925	0	48	0	0	-3.8427	19.0798
1	-2.88374	GO:0001666	M1	1	0	GO Biological Processes	19	response to hypoxia	-2.88374	1.75385	3.38438	24155	359	1266	33	2.60664	0.447804	329|538|596|824|890|891|1141|1535|1869|1978|3673|4851|4985|5300|5581|5688|5691|5692|5694|5704|5719|6839|6921|7012|7097|7351|10370|22933|23576|26355|29988|84962|132864	BIRC2|ATP7A|BCL2|CAPN2|CCNA2|CCNB1|CHRNB2|CYBA|E2F1|EIF4EBP1|ITGA2|NOTCH1|OPRD1|PIN1|PRKCE|PSMA7|PSMB3|PSMB4|PSMB6|PSMC4|PSMD13|SUV39H1|ELOC|TERC|TLR2|UCP2|CITED2|SIRT2|DDAH1|FAM162A|SLC2A8|AJUBA|CPEB2	-1.17925	0	52	0	0	-3.63714	2.47789
1	-2.8774	GO:0034227	M1	1	0	GO Biological Processes	19	tRNA thio-modification	-2.8774	11.4479	5.4948	24155	5	1266	3	0.236967	0.136651	81605|90353|348180	URM1|CTU1|CTU2	-1.17925	0	63	0	0	-3.25801	14.3098
1	-2.8774	GO:0007386	M1	1	0	GO Biological Processes	19	compartment pattern specification	-2.8774	11.4479	5.4948	24155	5	1266	3	0.236967	0.136651	4851|10683|28514	NOTCH1|DLL3|DLL1	-1.17925	0	73	1	1	-2.8774	11.4479
1	-2.87066	GO:0071453	M1	1	0	GO Biological Processes	19	cellular response to oxygen levels	-2.87066	1.9569	3.45926	24155	234	1266	24	1.89573	0.38328	538|596|890|891|1869|1978|4851|4985|5581|5688|5691|5692|5694|5704|5719|6839|6921|7012|10370|22933|23576|26355|84962|132864	ATP7A|BCL2|CCNA2|CCNB1|E2F1|EIF4EBP1|NOTCH1|OPRD1|PRKCE|PSMA7|PSMB3|PSMB4|PSMB6|PSMC4|PSMD13|SUV39H1|ELOC|TERC|CITED2|SIRT2|DDAH1|FAM162A|AJUBA|CPEB2	-1.17388	0	52	0	0	-3.63714	2.47789
1	-2.85439	GO:0030330	M1	1	0	GO Biological Processes	19	DNA damage response, signal transduction by p53 class mediator	-2.85439	2.49642	3.64841	24155	107	1266	14	1.10585	0.293911	546|581|602|891|983|995|1869|3276|5111|5934|6790|51512|161742|200734	ATRX|BAX|BCL3|CCNB1|CDK1|CDC25C|E2F1|PRMT1|PCNA|RBL2|AURKA|GTSE1|SPRED1|SPRED2	-1.16252	0	15	0	0	-5.96857	3.4071
1	-2.85255	GO:0072401	M1	1	0	GO Biological Processes	19	signal transduction involved in DNA integrity checkpoint	-2.85255	2.87504	3.77331	24155	73	1266	11	0.868878	0.260836	581|891|983|995|1869|3276|5111|5347|5934|6790|51512	BAX|CCNB1|CDK1|CDC25C|E2F1|PRMT1|PCNA|PLK1|RBL2|AURKA|GTSE1	-1.16252	0	15	0	0	-5.96857	3.4071
1	-2.85255	GO:0072422	M1	1	0	GO Biological Processes	19	signal transduction involved in DNA damage checkpoint	-2.85255	2.87504	3.77331	24155	73	1266	11	0.868878	0.260836	581|891|983|995|1869|3276|5111|5347|5934|6790|51512	BAX|CCNB1|CDK1|CDC25C|E2F1|PRMT1|PCNA|PLK1|RBL2|AURKA|GTSE1	-1.16252	0	15	0	0	-5.96857	3.4071
1	-2.85362	GO:0043009	M1	1	0	GO Biological Processes	19	chordate embryonic development	-2.85362	1.54701	3.26922	24155	629	1266	51	4.02844	0.552615	115|118|538|824|891|1956|1969|2348|3216|3218|3219|3276|4628|4751|4851|4863|5216|5333|5704|6385|6474|6497|6928|7026|7477|7779|9133|9355|9546|9646|9837|10087|10395|10512|10683|25942|28514|29985|51684|53615|53820|55723|57498|79682|134701|140467|144165|154796|221395|345630|441478	ADCY9|ADD1|ATP7A|CAPN2|CCNB1|EGFR|EPHA2|FOLR1|HOXB6|HOXB8|HOXB9|PRMT1|MYH10|NEK2|NOTCH1|NPAT|PFN1|PLCD1|PSMC4|SDC4|SHOX2|SKI|HNF1B|NR2F2|WNT7B|SLC30A1|CCNB2|LHX2|APBA3|CTR9|GINS1|CERT1|DLC1|SEMA3C|DLL3|SIN3A|DLL1|SLC39A3|SUFU|MBD3|RIPPLY3|ASF1B|KIDINS220|CENPU|RIPPLY2|ZNF358|PRICKLE1|AMOT|ADGRF5|FBLL1|NRARP	-1.16252	0	74	1	1	-2.85362	1.58998
1	-2.85297	GO:0060968	M1	1	0	GO Biological Processes	19	regulation of gene silencing	-2.85297	2.20151	3.54072	24155	156	1266	18	1.4218	0.332731	1956|5437|5439|5440|5605|8318|8352|8363|8480|8968|8971|9555|9698|23225|25942|54737|79902|84962	EGFR|POLR2H|POLR2J|POLR2K|MAP2K2|CDC45|H3C3|H4C11|RAE1|H3C7|H1-10|MACROH2A1|PUM1|NUP210|SIN3A|MPHOSPH8|NUP85|AJUBA	-1.16252	0	75	1	1	-2.85297	2.20151
1	-2.85089	GO:0051153	M1	1	0	GO Biological Processes	19	regulation of striated muscle cell differentiation	-2.85089	2.40501	3.61344	24155	119	1266	15	1.18483	0.304105	596|824|1432|1760|2146|4851|5300|6474|11214|28514|30846|55544|57817|284358|493829	BCL2|CAPN2|MAPK14|DMPK|EZH2|NOTCH1|PIN1|SHOX2|AKAP13|DLL1|EHD2|RBM38|HAMP|MAMSTR|TRIM72	-1.1622	0	55	0	0	-3.52602	2.98122
1	-2.84472	GO:0062033	M1	1	0	GO Biological Processes	19	positive regulation of mitotic sister chromatid segregation	-2.84472	5.6117	4.47335	24155	17	1266	5	0.394945	0.176276	9555|9700|51433|51529|81620	MACROH2A1|ESPL1|ANAPC5|ANAPC11|CDT1	-1.15869	0	22	0	0	-5.09181	8.4799
1	-2.84472	GO:1904355	M1	1	0	GO Biological Processes	19	positive regulation of telomere capping	-2.84472	5.6117	4.47335	24155	17	1266	5	0.394945	0.176276	4751|9212|11284|79035|140609	NEK2|AURKB|PNKP|NABP2|NEK7	-1.15869	0	56	0	0	-3.45945	5.6117
1	-2.83601	GO:0007265	M1	1	0	GO Biological Processes	19	Ras protein signal transduction	-2.83601	1.65726	3.30622	24155	449	1266	39	3.08057	0.485628	399|890|1432|2059|2245|2664|2859|3265|3925|4851|4983|5865|5873|5874|5962|6239|9101|9265|9828|9908|10253|10395|10603|11214|22800|23365|23682|25959|50618|51560|55785|57449|57646|81848|84904|116442|121512|143872|440730	RHOH|CCNA2|MAPK14|EPS8|FGD1|GDI1|GPR35|HRAS|STMN1|NOTCH1|OPHN1|RAB3B|RAB27A|RAB27B|RDX|RREB1|USP8|CYTH3|ARHGEF17|G3BP2|SPRY2|DLC1|SH2B2|AKAP13|RRAS2|ARHGEF12|RAB38|KANK2|ITSN2|RAB6B|FGD6|PLEKHG5|USP28|SPRY4|ARHGEF39|RAB39B|FGD4|ARHGAP42|TRIM67	-1.1513	0	60	0	0	-3.27458	2.16508
1	-2.83231	GO:0070848	M1	1	0	GO Biological Processes	19	response to growth factor	-2.83231	1.49747	3.23018	24155	739	1266	58	4.58136	0.58762	429|538|858|890|997|1432|1644|1841|1869|1956|1969|2261|2348|3077|3096|3730|3746|4053|4141|4176|4851|4985|5083|5170|5300|5437|5439|5440|5782|5962|6497|7337|7429|8631|9001|9101|9141|9350|9702|10253|10370|11156|22933|23543|26291|26509|28514|51256|53834|57498|79633|79674|81848|83891|161742|200734|283149|283375	ASCL1|ATP7A|CAV2|CCNA2|CDC34|MAPK14|DDC|DTYMK|E2F1|EGFR|EPHA2|FGFR3|FOLR1|HFE|HIVEP1|ANOS1|KCNC1|LTBP2|MARS1|MCM7|NOTCH1|OPRD1|PAX9|PDPK1|PIN1|POLR2H|POLR2J|POLR2K|PTPN12|RDX|SKI|UBE3A|VIL1|SKAP1|HAP1|USP8|PDCD5|CER1|CEP57|SPRY2|CITED2|PTP4A3|SIRT2|RBFOX2|FGF21|MYOF|DLL1|TBC1D7|FGFRL1|KIDINS220|FAT4|VEPH1|SPRY4|SNX25|SPRED1|SPRED2|BCL9L|SLC39A5	-1.14892	0	50	0	0	-3.76528	2.34313
1	-2.83012	GO:0009792	M1	1	0	GO Biological Processes	19	embryo development ending in birth or egg hatching	-2.83012	1.53583	3.24659	24155	646	1266	52	4.10742	0.557777	115|118|538|824|891|1956|1969|2348|3216|3218|3219|3276|4628|4751|4851|4863|5216|5333|5704|6385|6474|6497|6928|7026|7477|7779|8796|9133|9355|9546|9646|9837|10087|10395|10512|10683|25942|28514|29985|51684|53615|53820|55723|57498|79682|134701|140467|144165|154796|221395|345630|441478	ADCY9|ADD1|ATP7A|CAPN2|CCNB1|EGFR|EPHA2|FOLR1|HOXB6|HOXB8|HOXB9|PRMT1|MYH10|NEK2|NOTCH1|NPAT|PFN1|PLCD1|PSMC4|SDC4|SHOX2|SKI|HNF1B|NR2F2|WNT7B|SLC30A1|SCEL|CCNB2|LHX2|APBA3|CTR9|GINS1|CERT1|DLC1|SEMA3C|DLL3|SIN3A|DLL1|SLC39A3|SUFU|MBD3|RIPPLY3|ASF1B|KIDINS220|CENPU|RIPPLY2|ZNF358|PRICKLE1|AMOT|ADGRF5|FBLL1|NRARP	-1.14806	0	74	0	0	-2.85362	1.58998
1	-2.81357	GO:0061136	M1	1	0	GO Biological Processes	19	regulation of proteasomal protein catabolic process	-2.81357	2.08522	3.46569	24155	183	1266	20	1.57978	0.350448	3077|4983|5347|5704|5886|6449|6790|7110|8945|9655|9683|9695|22933|23640|25820|29761|55743|55872|144165|153769	HFE|OPHN1|PLK1|PSMC4|RAD23A|SGTA|AURKA|TMF1|BTRC|SOCS5|N4BP1|EDEM1|SIRT2|HSPBP1|ARIH1|USP25|CHFR|PBK|PRICKLE1|SH3RF2	-1.14062	0	14	0	0	-6.44798	2.55948
1	-2.81614	GO:0031571	M1	1	0	GO Biological Processes	19	mitotic G1 DNA damage checkpoint	-2.81614	3.02854	3.79153	24155	63	1266	10	0.789889	0.248796	581|891|983|995|1869|3276|5111|5934|6790|51512	BAX|CCNB1|CDK1|CDC25C|E2F1|PRMT1|PCNA|RBL2|AURKA|GTSE1	-1.14062	0	15	0	0	-5.96857	3.4071
1	-2.81614	GO:0044819	M1	1	0	GO Biological Processes	19	mitotic G1/S transition checkpoint	-2.81614	3.02854	3.79153	24155	63	1266	10	0.789889	0.248796	581|891|983|995|1869|3276|5111|5934|6790|51512	BAX|CCNB1|CDK1|CDC25C|E2F1|PRMT1|PCNA|RBL2|AURKA|GTSE1	-1.14062	0	15	0	0	-5.96857	3.4071
1	-2.8151	GO:0071156	M1	1	0	GO Biological Processes	19	regulation of cell cycle arrest	-2.8151	2.4733	3.60888	24155	108	1266	14	1.10585	0.293911	581|891|983|995|1019|1869|3276|3398|3642|4760|5111|5934|6790|51512	BAX|CCNB1|CDK1|CDC25C|CDK4|E2F1|PRMT1|ID2|INSM1|NEUROD1|PCNA|RBL2|AURKA|GTSE1	-1.14062	0	15	0	0	-5.96857	3.4071
1	-2.8142	GO:0021680	M1	1	0	GO Biological Processes	19	cerebellar Purkinje cell layer development	-2.8142	4.57915	4.21084	24155	25	1266	6	0.473934	0.193024	372|538|4628|28514|51286|124925	ARCN1|ATP7A|MYH10|DLL1|CEND1|SEZ6	-1.14062	0	46	0	0	-3.86022	9.53989
1	-2.8142	GO:0070199	M1	1	0	GO Biological Processes	19	establishment of protein localization to chromosome	-2.8142	4.57915	4.21084	24155	25	1266	6	0.473934	0.193024	9555|10856|55011|55135|79035|222229	MACROH2A1|RUVBL2|PIH1D1|WRAP53|NABP2|LRWD1	-1.14062	0	58	0	0	-3.35313	9.53989
1	-2.81592	GO:0002009	M1	1	0	GO Biological Processes	19	morphogenesis of an epithelium	-2.81592	1.58998	3.26091	24155	540	1266	45	3.5545	0.520372	538|596|1175|1956|1969|2348|3239|4070|4851|4983|5216|5241|5688|5691|5692|5694|5704|5719|5979|6239|6385|6497|6928|7477|8914|8945|9355|10253|10395|10512|28514|43847|51384|51684|55727|59277|64398|65009|79633|84446|84962|89958|94234|144165|441478	ATP7A|BCL2|AP2S1|EGFR|EPHA2|FOLR1|HOXD13|TACSTD2|NOTCH1|OPHN1|PFN1|PGR|PSMA7|PSMB3|PSMB4|PSMB6|PSMC4|PSMD13|RET|RREB1|SDC4|SKI|HNF1B|WNT7B|TIMELESS|BTRC|LHX2|SPRY2|DLC1|SEMA3C|DLL1|KLK14|WNT16|SUFU|BTBD7|NTN4|MPP5|NDRG4|FAT4|BRSK1|AJUBA|SAPCD2|FOXQ1|PRICKLE1|NRARP	-1.14062	0	74	0	0	-2.85362	1.58998
1	-2.80333	GO:0072395	M1	1	0	GO Biological Processes	19	signal transduction involved in cell cycle checkpoint	-2.80333	2.83618	3.72043	24155	74	1266	11	0.868878	0.260836	581|891|983|995|1869|3276|5111|5347|5934|6790|51512	BAX|CCNB1|CDK1|CDC25C|E2F1|PRMT1|PCNA|PLK1|RBL2|AURKA|GTSE1	-1.1346	0	15	0	0	-5.96857	3.4071
1	-2.80161	GO:0000077	M1	1	0	GO Biological Processes	19	DNA damage checkpoint	-2.80161	2.23694	3.51345	24155	145	1266	17	1.34281	0.323486	581|891|983|995|1432|1869|3014|3276|5111|5347|5934|6790|51347|51512|57646|84446|146956	BAX|CCNB1|CDK1|CDC25C|MAPK14|E2F1|H2AX|PRMT1|PCNA|PLK1|RBL2|AURKA|TAOK3|GTSE1|USP28|BRSK1|EME1	-1.1346	0	15	0	0	-5.96857	3.4071
1	-2.80115	GO:1903530	M1	1	0	GO Biological Processes	19	regulation of secretion by cell	-2.80115	1.48706	3.20215	24155	757	1266	59	4.66035	0.592419	773|1113|1136|1138|1141|1432|1956|2587|2821|2822|2867|3060|3077|3418|4628|4760|4851|5170|5443|5581|5865|5873|5874|6248|6385|6447|6616|6833|6855|6860|6934|7097|7100|7110|7186|7293|7779|8655|8941|9001|9341|9515|9581|10015|10814|11255|11267|22930|23086|26056|51083|54106|56943|57586|64215|65985|192683|222546|594855	CACNA1A|CHGA|CHRNA3|CHRNA5|CHRNB2|MAPK14|EGFR|GALR1|GPI|GPLD1|FFAR2|HCRT|HFE|IDH2|MYH10|NEUROD1|NOTCH1|PDPK1|POMC|PRKCE|RAB3B|RAB27A|RAB27B|RSC1A1|SDC4|SCG5|SNAP25|ABCC8|SYP|SYT4|TCF7L2|TLR2|TLR5|TMF1|TRAF2|TNFRSF4|SLC30A1|DYNLL1|CDK5R2|HAP1|VAMP3|STXBP5L|PREPL|PDCD6IP|CPLX2|HRH3|SNF8|RAB3GAP1|EXPH5|RAB11FIP5|GAL|TLR9|ENY2|SYT13|DNAJC1|AACS|SCAMP5|RFX6|CPLX3	-1.1346	0	34	0	0	-4.54004	2.1358
1	-2.80519	GO:0090224	M1	1	0	GO Biological Processes	19	regulation of spindle organization	-2.80519	3.54973	3.93558	24155	43	1266	8	0.631912	0.222707	5347|8480|10015|10460|10615|22974|79187|84722	PLK1|RAE1|PDCD6IP|TACC3|SPAG5|TPX2|FSD1|PSRC1	-1.1346	0	59	0	0	-3.3039	3.54973
1	-2.80161	GO:0006119	M1	1	0	GO Biological Processes	19	oxidative phosphorylation	-2.80161	2.23694	3.51345	24155	145	1266	17	1.34281	0.323486	514|518|538|891|983|1337|1537|4696|4702|4704|4708|4713|4715|6472|10105|10975|126328	ATP5F1E|ATP5MC3|ATP7A|CCNB1|CDK1|COX6A1|CYC1|NDUFA3|NDUFA8|NDUFA9|NDUFB2|NDUFB7|NDUFB9|SHMT2|PPIF|UQCR11|NDUFA11	-1.1346	0	76	1	1	-2.80161	2.68309
1	-2.79687	GO:0045840	M1	1	0	GO Biological Processes	19	positive regulation of mitotic nuclear division	-2.79687	3.23996	3.83928	24155	53	1266	9	0.7109	0.236123	5902|6790|9555|9700|11065|51203|51433|51529|81620	RANBP1|AURKA|MACROH2A1|ESPL1|UBE2C|NUSAP1|ANAPC5|ANAPC11|CDT1	-1.13159	0	22	0	0	-5.09181	8.4799
1	-2.78556	GO:2000060	M1	1	0	GO Biological Processes	19	positive regulation of ubiquitin-dependent protein catabolic process	-2.78556	2.55708	3.61382	24155	97	1266	13	1.02686	0.283333	5347|5886|6449|6790|9655|22933|23640|25820|28952|55743|144165|153769|440730	PLK1|RAD23A|SGTA|AURKA|SOCS5|SIRT2|HSPBP1|ARIH1|CCDC22|CHFR|PRICKLE1|SH3RF2|TRIM67	-1.12406	0	14	0	0	-6.44798	2.55948
1	-2.78659	GO:0042770	M1	1	0	GO Biological Processes	19	signal transduction in response to DNA damage	-2.78659	2.29531	3.52284	24155	133	1266	16	1.26382	0.313953	546|581|602|891|983|995|1432|1869|3276|5111|5347|5934|6790|51512|161742|200734	ATRX|BAX|BCL3|CCNB1|CDK1|CDC25C|MAPK14|E2F1|PRMT1|PCNA|PLK1|RBL2|AURKA|GTSE1|SPRED1|SPRED2	-1.12406	0	15	0	0	-5.96857	3.4071
1	-2.78556	GO:0044773	M1	1	0	GO Biological Processes	19	mitotic DNA damage checkpoint	-2.78556	2.55708	3.61382	24155	97	1266	13	1.02686	0.283333	581|891|983|995|1869|3276|5111|5934|6790|51347|51512|84446|146956	BAX|CCNB1|CDK1|CDC25C|E2F1|PRMT1|PCNA|RBL2|AURKA|TAOK3|GTSE1|BRSK1|EME1	-1.12406	0	15	0	0	-5.96857	3.4071
1	-2.77759	GO:1903052	M1	1	0	GO Biological Processes	19	positive regulation of proteolysis involved in cellular protein catabolic process	-2.77759	2.36526	3.54074	24155	121	1266	15	1.18483	0.304105	5347|5704|5886|6449|6790|9655|9695|22933|23640|25820|28952|55743|144165|153769|440730	PLK1|PSMC4|RAD23A|SGTA|AURKA|SOCS5|EDEM1|SIRT2|HSPBP1|ARIH1|CCDC22|CHFR|PRICKLE1|SH3RF2|TRIM67	-1.11734	0	14	0	0	-6.44798	2.55948
1	-2.77097	GO:0007050	M1	1	0	GO Biological Processes	19	cell cycle arrest	-2.77097	1.92401	3.36907	24155	238	1266	24	1.89573	0.38328	324|581|891|983|995|1019|1032|1033|1869|3265|3276|3398|3642|4760|4851|5111|5608|5934|6790|6934|28227|51512|84897|90480	APC|BAX|CCNB1|CDK1|CDC25C|CDK4|CDKN2D|CDKN3|E2F1|HRAS|PRMT1|ID2|INSM1|NEUROD1|NOTCH1|PCNA|MAP2K6|RBL2|AURKA|TCF7L2|PPP2R3B|GTSE1|TBRG1|GADD45GIP1	-1.11197	0	15	0	0	-5.96857	3.4071
1	-2.76286	GO:0044783	M1	1	0	GO Biological Processes	19	G1 DNA damage checkpoint	-2.76286	2.98122	3.73243	24155	64	1266	10	0.789889	0.248796	581|891|983|995|1869|3276|5111|5934|6790|51512	BAX|CCNB1|CDK1|CDC25C|E2F1|PRMT1|PCNA|RBL2|AURKA|GTSE1	-1.10883	0	15	0	0	-5.96857	3.4071
1	-2.76286	GO:0010830	M1	1	0	GO Biological Processes	19	regulation of myotube differentiation	-2.76286	2.98122	3.73243	24155	64	1266	10	0.789889	0.248796	596|824|1432|1760|4851|6474|30846|55544|284358|493829	BCL2|CAPN2|MAPK14|DMPK|NOTCH1|SHOX2|EHD2|RBM38|MAMSTR|TRIM72	-1.10883	0	55	0	0	-3.52602	2.98122
1	-2.76445	GO:0006400	M1	1	0	GO Biological Processes	19	tRNA modification	-2.76445	2.66229	3.63184	24155	86	1266	12	0.947867	0.272326	3028|55623|56931|80324|81605|81627|90353|91801|113179|127253|150962|348180	HSD17B10|THUMPD1|DUS3L|PUS1|URM1|TRMT1L|CTU1|ALKBH8|ADAT3|TYW3|PUS10|CTU2	-1.10883	0	63	0	0	-3.25801	14.3098
1	-2.76468	GO:0042326	M1	1	0	GO Biological Processes	19	negative regulation of phosphorylation	-2.76468	1.63075	3.24058	24155	468	1266	40	3.15956	0.491614	324|399|581|623|891|1032|2776|2873|3642|3843|5170|5300|5347|5585|5611|5783|7026|8655|9052|9555|9655|10048|10105|10217|10253|11142|22843|22933|23171|51347|55584|55870|55872|65125|81848|83891|84962|153769|161742|200734	APC|RHOH|BAX|BDKRB1|CCNB1|CDKN2D|GNAQ|GPS1|INSM1|IPO5|PDPK1|PIN1|PLK1|PKN1|DNAJC3|PTPN13|NR2F2|DYNLL1|GPRC5A|MACROH2A1|SOCS5|RANBP9|PPIF|CTDSPL|SPRY2|PKIG|PPM1E|SIRT2|GPD1L|TAOK3|CHRNA9|ASH1L|PBK|WNK1|SPRY4|SNX25|AJUBA|SH3RF2|SPRED1|SPRED2	-1.10883	0	77	1	1	-2.76468	1.73453
1	-2.75253	GO:0051129	M1	1	0	GO Biological Processes	19	negative regulation of cellular component organization	-2.75253	1.48541	3.16505	24155	745	1266	58	4.58136	0.58762	118|324|329|546|891|899|991|1978|2059|2664|3475|3925|4070|4085|4751|4851|4985|5216|5347|5780|5962|6497|6860|7097|7337|7429|8301|8971|9094|9183|9212|9232|9319|9555|9637|9700|10105|10253|10395|10403|10512|22933|25942|26271|29766|29993|51256|55011|57600|79929|80119|80128|81620|124930|192683|257364|286151|348110	ADD1|APC|BIRC2|ATRX|CCNB1|CCNF|CDC20|EIF4EBP1|EPS8|GDI1|IFRD1|STMN1|TACSTD2|MAD2L1|NEK2|NOTCH1|OPRD1|PFN1|PLK1|PTPN9|RDX|SKI|SYT4|TLR2|UBE3A|VIL1|PICALM|H1-10|UNC119|ZW10|AURKB|PTTG1|TRIP13|MACROH2A1|FEZ2|ESPL1|PPIF|SPRY2|DLC1|NDC80|SEMA3C|SIRT2|SIN3A|FBXO5|TMOD3|PACSIN1|TBC1D7|PIH1D1|FNIP2|MAP6D1|PIF1|TRIM46|CDT1|ANKRD13B|SCAMP5|SNX33|FBXO43|ARPIN	-1.09972	0	6	0	0	-10.0764	6.73404
1	-2.74655	GO:0046578	M1	1	0	GO Biological Processes	19	regulation of Ras protein signal transduction	-2.74655	1.91596	3.3468	24155	239	1266	24	1.89573	0.38328	2059|2245|2859|3265|3925|4851|4983|5962|9265|9828|10253|10395|10603|11214|23365|25959|50618|55785|57449|81848|84904|121512|143872|440730	EPS8|FGD1|GPR35|HRAS|STMN1|NOTCH1|OPHN1|RDX|CYTH3|ARHGEF17|SPRY2|DLC1|SH2B2|AKAP13|ARHGEF12|KANK2|ITSN2|FGD6|PLEKHG5|SPRY4|ARHGEF39|FGD4|ARHGAP42|TRIM67	-1.09498	0	60	0	0	-3.27458	2.16508
1	-2.74464	GO:0098876	M1	1	0	GO Biological Processes	19	vesicle-mediated transport to the plasma membrane	-2.74464	2.53099	3.5716	24155	98	1266	13	1.02686	0.283333	288|373|381|582|2803|6616|8548|9341|9581|9648|28952|91461|149371	ANK3|TRIM23|ARF5|BBS1|GOLGA4|SNAP25|BLZF1|VAMP3|PREPL|GCC2|CCDC22|PKDCC|EXOC8	-1.0943	0	45	0	0	-3.9053	3.72288
1	-2.74169	GO:0006282	M1	1	0	GO Biological Processes	19	regulation of DNA repair	-2.74169	2.34587	3.50492	24155	122	1266	15	1.18483	0.304105	1054|1663|1956|2074|3014|4862|5111|5531|5888|8914|10635|10721|55010|55135|149840	CEBPG|DDX11|EGFR|ERCC6|H2AX|NPAS2|PCNA|PPP4C|RAD51|TIMELESS|RAD51AP1|POLQ|PARPBP|WRAP53|SHLD1	-1.09256	0	4	0	0	-10.2453	3.39196
1	-2.73483	GO:1905820	M1	1	0	GO Biological Processes	19	positive regulation of chromosome separation	-2.73483	6.9381	4.63273	24155	11	1266	4	0.315956	0.157728	9700|51433|51529|81620	ESPL1|ANAPC5|ANAPC11|CDT1	-1.09176	0	22	0	0	-5.09181	8.4799
1	-2.73802	GO:0090329	M1	1	0	GO Biological Processes	19	regulation of DNA-dependent DNA replication	-2.73802	3.17996	3.77161	24155	54	1266	9	0.7109	0.236123	546|5982|5984|8914|26271|57418|79075|80174|81620	ATRX|RFC2|RFC4|TIMELESS|FBXO5|WDR18|DSCC1|DBF4B|CDT1	-1.09176	0	25	0	0	-4.90815	3.70996
1	-2.73483	GO:0035404	M1	1	0	GO Biological Processes	19	histone-serine phosphorylation	-2.73483	6.9381	4.63273	24155	11	1266	4	0.315956	0.157728	891|6790|7443|9212	CCNB1|AURKA|VRK1|AURKB	-1.09176	0	44	0	0	-3.92475	8.17705
1	-2.73514	GO:0031503	M1	1	0	GO Biological Processes	19	protein-containing complex localization	-2.73514	1.83329	3.30433	24155	281	1266	27	2.1327	0.406038	332|1759|3092|3265|3800|4983|6427|6616|8106|8480|8636|8655|8683|10189|10212|23225|29107|50632|54468|55110|56943|79659|79902|83903|84271|201134|254263	BIRC5|DNM1|HIP1|HRAS|KIF5C|OPHN1|SRSF2|SNAP25|PABPN1|RAE1|SSNA1|DYNLL1|SRSF9|ALYREF|DDX39A|NUP210|NXT1|CALY|MIOS|MAGOHB|ENY2|DYNC2H1|NUP85|HASPIN|POLDIP3|CEP112|CNIH2	-1.09176	0	78	1	1	-2.73514	1.83329
1	-2.73483	GO:0045793	M1	1	0	GO Biological Processes	19	positive regulation of cell size	-2.73483	6.9381	4.63273	24155	11	1266	4	0.315956	0.157728	538|1019|5979|114908	ATP7A|CDK4|RET|TMEM123	-1.09176	0	79	1	1	-2.73483	6.9381
1	-2.72865	GO:0038061	M1	1	0	GO Biological Processes	19	NIK/NF-kappaB signaling	-2.72865	2.05159	3.38591	24155	186	1266	20	1.57978	0.350448	329|330|602|1956|4306|5531|5688|5691|5692|5694|5704|5719|7097|7098|7186|8945|9966|10725|11156|54106	BIRC2|BIRC3|BCL3|EGFR|NR3C2|PPP4C|PSMA7|PSMB3|PSMB4|PSMB6|PSMC4|PSMD13|TLR2|TLR3|TRAF2|BTRC|TNFSF15|NFAT5|PTP4A3|TLR9	-1.08798	0	54	0	0	-3.58889	2.05159
1	-2.72865	GO:0070507	M1	1	0	GO Biological Processes	19	regulation of microtubule cytoskeleton organization	-2.72865	2.05159	3.38591	24155	186	1266	20	1.57978	0.350448	324|899|3925|4751|5347|5902|6790|8480|10015|10460|10615|22974|25886|57606|79187|79929|84722|85458|220134|221150	APC|CCNF|STMN1|NEK2|PLK1|RANBP1|AURKA|RAE1|PDCD6IP|TACC3|SPAG5|TPX2|POC1A|SLAIN2|FSD1|MAP6D1|PSRC1|DIXDC1|SKA1|SKA3	-1.08798	0	59	0	0	-3.3039	3.54973
1	-2.71888	GO:0001889	M1	1	0	GO Biological Processes	19	liver development	-2.71888	2.26131	3.4562	24155	135	1266	16	1.26382	0.313953	440|538|1054|1956|2146|3077|3673|4851|5106|5111|6790|6928|7298|10370|57817|65985	ASNS|ATP7A|CEBPG|EGFR|EZH2|HFE|ITGA2|NOTCH1|PCK2|PCNA|AURKA|HNF1B|TYMS|CITED2|HAMP|AACS	-1.08297	0	43	0	0	-4.01421	4.45195
1	-2.71888	GO:0032543	M1	1	0	GO Biological Processes	19	mitochondrial translation	-2.71888	2.26131	3.4562	24155	135	1266	16	1.26382	0.313953	3396|6182|6183|6472|10102|26284|28998|51001|51116|51258|51642|57129|63875|84881|90480|122704	MRPL58|MRPL12|MRPS12|SHMT2|TSFM|ERAL1|MRPL13|MTERF3|MRPS2|MRPL51|MRPL48|MRPL47|MRPL17|RPUSD4|GADD45GIP1|MRPL52	-1.08297	0	65	0	0	-3.13858	2.78693
1	-2.71974	GO:0060074	M1	1	0	GO Biological Processes	19	synapse maturation	-2.71974	4.40303	4.08301	24155	26	1266	6	0.473934	0.193024	816|991|5216|9148|9378|124925	CAMK2B|CDC20|PFN1|NEURL1|NRXN1|SEZ6	-1.08297	0	67	0	0	-3.11626	8.4799
1	-2.7224	GO:0039535	M1	1	0	GO Biological Processes	19	regulation of RIG-I signaling pathway	-2.7224	5.29994	4.29195	24155	18	1266	5	0.394945	0.176276	329|330|9698|26057|79671	BIRC2|BIRC3|PUM1|ANKRD17|NLRX1	-1.08297	0	80	1	1	-2.7224	6.35993
1	-2.71081	GO:0045739	M1	1	0	GO Biological Processes	19	positive regulation of DNA repair	-2.71081	2.93535	3.67448	24155	65	1266	10	0.789889	0.248796	1054|1663|1956|2074|3014|4862|5111|8914|55135|149840	CEBPG|DDX11|EGFR|ERCC6|H2AX|NPAS2|PCNA|TIMELESS|WRAP53|SHLD1	-1.07608	0	4	0	0	-10.2453	3.39196
1	-2.70487	GO:0051294	M1	1	0	GO Biological Processes	19	establishment of spindle orientation	-2.70487	3.81596	3.92075	24155	35	1266	7	0.552923	0.208407	1058|4085|5347|9183|10253|10403|89958	CENPA|MAD2L1|PLK1|ZW10|SPRY2|NDC80|SAPCD2	-1.07132	0	6	0	0	-10.0764	6.73404
1	-2.68566	GO:0007292	M1	1	0	GO Biological Processes	19	female gamete generation	-2.68566	2.24468	3.42332	24155	136	1266	16	1.26382	0.313953	596|891|994|5241|5347|5889|6790|9319|9665|9985|10766|22933|23397|26271|29781|342977	BCL2|CCNB1|CDC25B|PGR|PLK1|RAD51C|AURKA|TRIP13|MARF1|REC8|TOB2|SIRT2|NCAPH|FBXO5|NCAPH2|NANOS3	-1.05328	0	32	0	0	-4.68849	9.53989
1	-2.67787	GO:0043044	M1	1	0	GO Biological Processes	19	ATP-dependent chromatin remodeling	-2.67787	2.60179	3.54025	24155	88	1266	12	0.947867	0.272326	1058|8363|11339|51412|53615|55355|55839|64946|79019|79682|387103|401541	CENPA|H4C11|OIP5|ACTL6B|MBD3|HJURP|CENPN|CENPH|CENPM|CENPU|CENPW|CENPP	-1.04667	0	7	0	0	-9.46648	6.35993
1	-2.67322	GO:0010569	M1	1	0	GO Biological Processes	19	regulation of double-strand break repair via homologous recombination	-2.67322	3.39196	3.77711	24155	45	1266	8	0.631912	0.222707	5531|5888|8914|10635|10721|55010|55135|149840	PPP4C|RAD51|TIMELESS|RAD51AP1|POLQ|PARPBP|WRAP53|SHLD1	-1.04319	0	4	0	0	-10.2453	3.39196
1	-2.67044	GO:0036293	M1	1	0	GO Biological Processes	19	response to decreased oxygen levels	-2.67044	1.70171	3.19893	24155	370	1266	33	2.60664	0.447804	329|538|596|824|890|891|1141|1535|1869|1978|3673|4851|4985|5300|5581|5688|5691|5692|5694|5704|5719|6839|6921|7012|7097|7351|10370|22933|23576|26355|29988|84962|132864	BIRC2|ATP7A|BCL2|CAPN2|CCNA2|CCNB1|CHRNB2|CYBA|E2F1|EIF4EBP1|ITGA2|NOTCH1|OPRD1|PIN1|PRKCE|PSMA7|PSMB3|PSMB4|PSMB6|PSMC4|PSMD13|SUV39H1|ELOC|TERC|TLR2|UCP2|CITED2|SIRT2|DDAH1|FAM162A|SLC2A8|AJUBA|CPEB2	-1.04317	0	52	0	0	-3.63714	2.47789
1	-2.66856	GO:0140053	M1	1	0	GO Biological Processes	19	mitochondrial gene expression	-2.66856	2.11998	3.36373	24155	162	1266	18	1.4218	0.332731	3028|3396|6182|6183|6472|10102|26284|28998|51001|51116|51258|51642|57129|63875|80324|84881|90480|122704	HSD17B10|MRPL58|MRPL12|MRPS12|SHMT2|TSFM|ERAL1|MRPL13|MTERF3|MRPS2|MRPL51|MRPL48|MRPL47|MRPL17|PUS1|RPUSD4|GADD45GIP1|MRPL52	-1.04317	0	65	0	0	-3.13858	2.78693
1	-2.67134	GO:0051101	M1	1	0	GO Biological Processes	19	regulation of DNA binding	-2.67134	2.30804	3.43434	24155	124	1266	15	1.18483	0.304105	602|1054|1869|3148|3398|3673|4751|4760|4830|6497|9355|22933|25942|55355|81620	BCL3|CEBPG|E2F1|HMGB2|ID2|ITGA2|NEK2|NEUROD1|NME1|SKI|LHX2|SIRT2|SIN3A|HJURP|CDT1	-1.04317	0	81	1	1	-2.67134	2.30804
1	-2.66856	GO:0016482	M1	1	0	GO Biological Processes	19	cytosolic transport	-2.66856	2.11998	3.36373	24155	162	1266	18	1.4218	0.332731	5605|5962|7260|7813|9341|9581|9648|10228|11267|25963|27252|51479|51560|55111|55823|64145|80128|112936	MAP2K2|RDX|EIPR1|EVI5|VAMP3|PREPL|GCC2|STX6|SNF8|TMEM87A|KLHL20|ANKFY1|RAB6B|PLEKHJ1|VPS11|RBSN|TRIM46|VPS26B	-1.04317	0	82	1	1	-2.66856	2.48867
1	-2.66738	GO:0045732	M1	1	0	GO Biological Processes	19	positive regulation of protein catabolic process	-2.66738	1.95235	3.29877	24155	215	1266	22	1.73776	0.367258	324|2822|4946|5347|5704|5886|5962|6449|6790|9655|9695|11267|22933|23640|25820|28952|55743|55823|144165|153769|257364|440730	APC|GPLD1|OAZ1|PLK1|PSMC4|RAD23A|RDX|SGTA|AURKA|SOCS5|EDEM1|SNF8|SIRT2|HSPBP1|ARIH1|CCDC22|CHFR|VPS11|PRICKLE1|SH3RF2|SNX33|TRIM67	-1.04315	0	14	0	0	-6.44798	2.55948
1	-2.65994	GO:0051785	M1	1	0	GO Biological Processes	19	positive regulation of nuclear division	-2.65994	2.89088	3.61762	24155	66	1266	10	0.789889	0.248796	5902|6790|9555|9700|11065|22933|51203|51433|51529|81620	RANBP1|AURKA|MACROH2A1|ESPL1|UBE2C|SIRT2|NUSAP1|ANAPC5|ANAPC11|CDT1	-1.03685	0	22	0	0	-5.09181	8.4799
1	-2.65084	GO:0042593	M1	1	0	GO Biological Processes	19	glucose homeostasis	-2.65084	1.88442	3.25876	24155	243	1266	24	1.89573	0.38328	1408|1535|2822|2867|4760|4830|5106|5443|5581|6934|7425|8655|9515|22841|25942|26056|26291|55011|55777|56943|65985|79058|221395|222546	CRY2|CYBA|GPLD1|FFAR2|NEUROD1|NME1|PCK2|POMC|PRKCE|TCF7L2|VGF|DYNLL1|STXBP5L|RAB11FIP2|SIN3A|RAB11FIP5|FGF21|PIH1D1|MBD5|ENY2|AACS|ASPSCR1|ADGRF5|RFX6	-1.0289	0	34	0	0	-4.54004	2.1358
1	-2.639	GO:1902600	M1	1	0	GO Biological Processes	19	proton transmembrane transport	-2.639	2.10697	3.33499	24155	163	1266	18	1.4218	0.332731	476|489|495|514|518|534|538|1337|1537|7351|9296|10063|10105|11182|29988|56901|57282|155066	ATP1A1|ATP2A3|ATP4A|ATP5F1E|ATP5MC3|ATP6V1G2|ATP7A|COX6A1|CYC1|UCP2|ATP6V1F|COX17|PPIF|SLC2A6|SLC2A8|NDUFA4L2|SLC4A10|ATP6V0E2	-1.01821	0	36	0	0	-4.26206	2.10697
1	-2.63573	GO:0070126	M1	1	0	GO Biological Processes	19	mitochondrial translational termination	-2.63573	2.57255	3.4954	24155	89	1266	12	0.947867	0.272326	3396|6182|6183|26284|28998|51116|51258|51642|57129|63875|90480|122704	MRPL58|MRPL12|MRPS12|ERAL1|MRPL13|MRPS2|MRPL51|MRPL48|MRPL47|MRPL17|GADD45GIP1|MRPL52	-1.01608	0	65	0	0	-3.13858	2.78693
1	-2.63077	GO:0045740	M1	1	0	GO Biological Processes	19	positive regulation of DNA replication	-2.63077	3.70996	3.82677	24155	36	1266	7	0.552923	0.208407	546|983|1956|3265|5111|80174|81620	ATRX|CDK1|EGFR|HRAS|PCNA|DBF4B|CDT1	-1.0138	0	25	0	0	-4.90815	3.70996
1	-2.63005	GO:0009649	M1	1	0	GO Biological Processes	19	entrainment of circadian clock	-2.63005	4.23995	3.96148	24155	27	1266	6	0.473934	0.193024	1408|2776|3398|8863|26224|220202	CRY2|GNAQ|ID2|PER3|FBXL3|ATOH7	-1.0138	0	26	0	0	-4.88157	4.23995
1	-2.63127	GO:0006913	M1	1	0	GO Biological Processes	19	nucleocytoplasmic transport	-2.63127	1.72441	3.17784	24155	343	1266	31	2.44866	0.434374	1432|3838|3843|4760|6427|6628|6632|6636|6637|6934|8106|8480|8683|10189|10204|10212|10768|11142|11214|23225|23633|29107|51512|51684|55110|56943|64062|79760|79902|84271|144165	MAPK14|KPNA2|IPO5|NEUROD1|SRSF2|SNRPB|SNRPD1|SNRPF|SNRPG|TCF7L2|PABPN1|RAE1|SRSF9|ALYREF|NUTF2|DDX39A|AHCYL1|PKIG|AKAP13|NUP210|KPNA6|NXT1|GTSE1|SUFU|MAGOHB|ENY2|RBM26|GEMIN7|NUP85|POLDIP3|PRICKLE1	-1.0138	0	78	0	0	-2.73514	1.83329
1	-2.6263	GO:0060828	M1	1	0	GO Biological Processes	19	regulation of canonical Wnt signaling pathway	-2.6263	1.80124	3.20572	24155	286	1266	27	2.1327	0.406038	324|1432|1500|1501|1956|2348|2776|4163|4851|5300|5688|5691|5692|5694|5704|5719|6934|8796|8945|9101|10076|10856|65125|130612|144165|205147|441478	APC|MAPK14|CTNND1|CTNND2|EGFR|FOLR1|GNAQ|MCC|NOTCH1|PIN1|PSMA7|PSMB3|PSMB4|PSMB6|PSMC4|PSMD13|TCF7L2|SCEL|BTRC|USP8|PTPRU|RUVBL2|WNK1|TMEM198|PRICKLE1|AMER3|NRARP	-1.01319	0	30	0	0	-4.72472	1.80124
1	-2.62739	GO:0033500	M1	1	0	GO Biological Processes	19	carbohydrate homeostasis	-2.62739	1.8767	3.23702	24155	244	1266	24	1.89573	0.38328	1408|1535|2822|2867|4760|4830|5106|5443|5581|6934|7425|8655|9515|22841|25942|26056|26291|55011|55777|56943|65985|79058|221395|222546	CRY2|CYBA|GPLD1|FFAR2|NEUROD1|NME1|PCK2|POMC|PRKCE|TCF7L2|VGF|DYNLL1|STXBP5L|RAB11FIP2|SIN3A|RAB11FIP5|FGF21|PIH1D1|MBD5|ENY2|AACS|ASPSCR1|ADGRF5|RFX6	-1.01319	0	34	0	0	-4.54004	2.1358
1	-2.62493	GO:0048488	M1	1	0	GO Biological Processes	19	synaptic vesicle endocytosis	-2.62493	3.06639	3.64087	24155	56	1266	9	0.7109	0.236123	1056|1759|4983|5874|6855|8301|8867|29993|115548	CEL|DNM1|OPHN1|RAB27B|SYP|PICALM|SYNJ1|PACSIN1|FCHO2	-1.01319	0	83	1	1	-2.62493	3.06639
1	-2.62493	GO:0140238	M1	1	0	GO Biological Processes	19	presynaptic endocytosis	-2.62493	3.06639	3.64087	24155	56	1266	9	0.7109	0.236123	1056|1759|4983|5874|6855|8301|8867|29993|115548	CEL|DNM1|OPHN1|RAB27B|SYP|PICALM|SYNJ1|PACSIN1|FCHO2	-1.01319	0	83	0	0	-2.62493	3.06639
1	-2.61981	GO:0031344	M1	1	0	GO Biological Processes	19	regulation of cell projection organization	-2.61981	1.48219	3.06257	24155	708	1266	55	4.34439	0.572932	324|538|688|816|991|1136|1141|1969|2059|2146|2664|2803|3265|3475|3673|4070|4830|5216|5780|5962|5979|6239|6474|6616|6860|7226|7337|7429|7813|8655|8814|9001|9148|10083|10253|10512|22941|23077|25942|29993|50618|50674|51188|51256|57498|65009|80128|84446|115703|124925|221914|347733|348110|375790|440730	APC|ATP7A|KLF5|CAMK2B|CDC20|CHRNA3|CHRNB2|EPHA2|EPS8|EZH2|GDI1|GOLGA4|HRAS|IFRD1|ITGA2|TACSTD2|NME1|PFN1|PTPN9|RDX|RET|RREB1|SHOX2|SNAP25|SYT4|TRPM2|UBE3A|VIL1|EVI5|DYNLL1|CDKL1|HAP1|NEURL1|USH1C|SPRY2|SEMA3C|SHANK2|MYCBP2|SIN3A|PACSIN1|ITSN2|NEUROG3|SS18L2|TBC1D7|KIDINS220|NDRG4|TRIM46|BRSK1|ARHGAP33|SEZ6|GPC2|TUBB2B|ARPIN|AGRN|TRIM67	-1.01252	0	19	0	0	-5.53981	1.81575
1	-2.62046	GO:0061008	M1	1	0	GO Biological Processes	19	hepaticobiliary system development	-2.62046	2.21215	3.35841	24155	138	1266	16	1.26382	0.313953	440|538|1054|1956|2146|3077|3673|4851|5106|5111|6790|6928|7298|10370|57817|65985	ASNS|ATP7A|CEBPG|EGFR|EZH2|HFE|ITGA2|NOTCH1|PCK2|PCNA|AURKA|HNF1B|TYMS|CITED2|HAMP|AACS	-1.01252	0	43	0	0	-4.01421	4.45195
1	-2.62127	GO:0051259	M1	1	0	GO Biological Processes	19	protein complex oligomerization	-2.62127	1.54519	3.09233	24155	568	1266	46	3.63349	0.525906	324|329|330|581|638|858|1141|1495|2040|2193|2643|3028|3265|3276|3746|4077|4985|5888|6241|6472|6497|6767|7186|7226|7915|8192|8352|8363|8968|9312|9702|9908|10015|10721|23210|23590|27433|53834|53840|60684|79026|79187|80146|89122|255022|493829	APC|BIRC2|BIRC3|BAX|BIK|CAV2|CHRNB2|CTNNA1|STOM|FARSA|GCH1|HSD17B10|HRAS|PRMT1|KCNC1|NBR1|OPRD1|RAD51|RRM2|SHMT2|SKI|ST13|TRAF2|TRPM2|ALDH5A1|CLPP|H3C3|H4C11|H3C7|KCNB2|CEP57|G3BP2|PDCD6IP|POLQ|JMJD6|PDSS1|TOR2A|FGFRL1|TRIM34|TRAPPC11|AHNAK|FSD1|UXS1|TRIM4|CALHM1|TRIM72	-1.01252	0	84	1	1	-2.62127	2.07067
1	-2.62046	GO:0008584	M1	1	0	GO Biological Processes	19	male gonad development	-2.62046	2.21215	3.35841	24155	138	1266	16	1.26382	0.313953	546|581|596|638|1495|2175|3148|4521|5926|7098|7110|7812|9985|10370|51742|192670	ATRX|BAX|BCL2|BIK|CTNNA1|FANCA|HMGB2|NUDT1|ARID4A|TLR3|TMF1|CSDE1|REC8|CITED2|ARID4B|AGO4	-1.01252	0	85	1	1	-2.62046	2.21215
[truncated: 207 more rows]
