# Supplementary material for: A Division of Labor between YAP and TAZ in Non–Small Cell Lung Cancer
Source: Oxford University Press journal article supplement (doi:10.1158/0008-5472.can-20-0125), 2020-08-14
Supplement: 00085472can200125-sup-235469_2_supp_6451214_qrjr2t.xlsx [file 00085472can200125-sup-235469_2_supp_6451214_qrjr2t.xlsx]

## Sheet: RT-qPCR Primers
Gene	Forward primer	Reverse primer
GAPDH	ACCCACTCCTCCACCTTTGA	CTGTTGCTGTAGCCAAATTCGT
HPRT	CTGAGGATTTGGAAAGGGTGT	CATCTCGAGCAAGACGTTCA
YAP	GCCGGAGCCCAAATCC	GCAGAGAAGCTGGAGAGGAATG
TAZ	CGATGACCCCAGACATGAGA	CTCGAATGATATGGCCCTCC
PLK1	AAAGGGCACAGTTTCGAGGT	TGGTTTGCCCACTAACAAGG
CIT	TGCTGAAGTGCAGGTGGTAA	TGTTCCGCTCTTCCTCAAAA
KI23	CCTAACGTCCCGCAGTCTT	AGGTTTCCGGGGTGTCTTAG
CDC20	CTGTCTGAGTGCCGTGGAT	TCCTTGTAATGGGGAGACCA
ITGB8	GTCATCTTTGCAGTTCAAGGAAA	AGGTTTGCAGCCTTTGATTCT
LAMA3	ATTTGGGCGGGAGGCAAATA	GGACACCACAACCTCACCAT
SYNPO	CAGCCAGGACTGGGATGTAG	TTCTCCGTGAGGCTAGTGCT
CLDN5	AGCTCGTACTTCTGCGACAC	GAGGCGTGCTCTACCTGTTT
CYR61	CAGGACTGTGAAGATGCGGT	GCCTGTAGAAGGGAAACGCT
ANKRD1	AGTAGAGGAACTGGTCACTGG	TGGGCTAGAAGTGTCTTCAGAT
CDK1	AGGAAGGGGTTCCTAGTACTGC	TGGAATCCTGCATAAGCACA
NUF2	ACAGGAGCTGATGGTAAAAACCT	AAAATGTTCCAGTCGAATTCCATA

## Sheet: siRNA oligos
siGENOME SMARTpool human:
Catalog #	Target	Sequences
D-001210-05	negative control	UGGUUUACAUGUCGACUAA
M-012200-00	YAP	GCACCUAUCACUCUCGAGA; GAACAUAGAAGGAGAGGAG; CCACCAAGCUAGAUAAAGA; GGUCAGAGAUACUUCUUAA
M-016083-00	TAZ	AAGCCUAGCUCGUGGCGGA; AGGAACAAACGUUGACUUA; GGACAAACACCCAUGAACA; GACAUGAGAUCCAUCACUA
M-003290-01	PLK1	CAACCAAAGUCGAAUAUGA; CAAGAAGAAUGAAUACAGU; GAAGAUGUCCAUGGAAAUA; CAACACGCCUCAUCCUCUA
siGENOME Individual siRNA oligos human:
Catalog #	Target	Sequences
D-012200-02	YAP	CCACCAAGCUAGAUAAAGA
D-012200-04	YAP	GCACCUAUCACUCUCGAGA
D-016083-02	TAZ	GGACAAACACCCAUGAACA
D-016083-04	TAZ	AAGCCUAGCUCGUGGCGGA
